# Supplementary material for: Neuropathological and transcriptomic characteristics of the aged brain
Source: eLife. 2017 Nov 9;6:e31126. doi: 10.7554/eLife.31126 (PMC5679757; doi:10.7554/eLife.31126)
Supplement: Figure 4—source data 1. [file elife-31126-fig4-data1.xlsx]

## Sheet: SourceData1
Gene	HIP	HIP_kME	TCx	TCx_kME	PCx	PCx_kME	FWM	FWM_kME
A1BG-AS1	HIP_M00	0.319138	TCx_M00	0.303364	PCx_M00	0.154832	FWM_M00	0.186334
A2M	HIP_M00	0.39063	TCx_M20	0.530859	PCx_M00	0.392873	FWM_M17	0.618267
A2M-AS1	HIP_M00	0.303448	TCx_M10	0.468087	PCx_M11	0.431773	FWM_M00	0.37376
A2ML1	HIP_M00	0.395076	TCx_M00	0.267591	PCx_M00	0.173845	FWM_M00	0.107068
AAAS	HIP_M19	0.512013	TCx_M00	0.270598	PCx_M00	0.307484	FWM_M15	0.709207
AACS	HIP_M02	0.624783	TCx_M02	0.678814	PCx_M03	0.572739	FWM_M01	0.909799
AADAT	HIP_M19	0.502154	TCx_M00	0.250304	PCx_M00	0.369807	FWM_M00	0.256675
AAED1	HIP_M20	0.466048	TCx_M18	0.455035	PCx_M16	0.455548	FWM_M15	0.599575
AAGAB	HIP_M06	0.555617	TCx_M04	0.599899	PCx_M00	0.339485	FWM_M01	0.453039
AAK1	HIP_M02	0.720574	TCx_M01	0.725864	PCx_M03	0.840456	FWM_M01	0.952709
AAMDC	HIP_M19	0.550987	TCx_M19	0.45195	PCx_M19	0.444749	FWM_M15	0.798609
AAMP	HIP_M06	0.428257	TCx_M04	0.577595	PCx_M04	0.580995	FWM_M08	0.562143
AAR2	HIP_M00	0.303942	TCx_M00	0.301188	PCx_M18	0.407095	FWM_M15	0.580444
AARS	HIP_M05	0.577111	TCx_M01	0.574443	PCx_M03	0.546664	FWM_M01	0.599832
AARS2	HIP_M14	0.608964	TCx_M13	0.639132	PCx_M14	0.568794	FWM_M08	0.598637
AARSD1	HIP_M06	0.771084	TCx_M04	0.681024	PCx_M04	0.534319	FWM_M01	0.684852
AASDH	HIP_M00	0.311619	TCx_M00	0.249175	PCx_M00	0.21603	FWM_M00	0.157085
AASDHPPT	HIP_M10	0.875407	TCx_M08	0.843967	PCx_M09	0.630394	FWM_M01	0.725974
AASS	HIP_M15	0.829384	TCx_M19	0.615898	PCx_M19	0.76809	FWM_M15	0.92433
AATF	HIP_M16	0.42293	TCx_M00	0.267873	PCx_M07	0.440697	FWM_M12	0.751507
AATK	HIP_M14	0.836203	TCx_M13	0.864605	PCx_M14	0.726521	FWM_M10	0.926292
ABAT	HIP_M03	0.439443	TCx_M04	0.511348	PCx_M00	0.259329	FWM_M01	0.869508
ABCA1	HIP_M17	0.404499	TCx_M17	0.729947	PCx_M17	0.779202	FWM_M16	0.700365
ABCA10	HIP_M10	0.583905	TCx_M15	0.483981	PCx_M16	0.409628	FWM_M01	0.828161
ABCA11P	HIP_M06	0.690446	TCx_M15	0.750755	PCx_M16	0.83869	FWM_M01	0.404332
ABCA2	HIP_M14	0.773598	TCx_M13	0.68072	PCx_M19	0.683456	FWM_M12	0.932292
ABCA3	HIP_M14	0.73826	TCx_M13	0.837026	PCx_M14	0.830356	FWM_M09	0.865439
ABCA5	HIP_M10	0.773689	TCx_M01	0.582207	PCx_M09	0.700674	FWM_M01	0.707002
ABCA6	HIP_M20	0.40564	TCx_M19	0.453618	PCx_M19	0.576896	FWM_M16	0.603315
ABCA7	HIP_M14	0.649762	TCx_M13	0.719751	PCx_M14	0.716917	FWM_M09	0.759066
ABCA8	HIP_M19	0.616338	TCx_M19	0.797524	PCx_M19	0.822608	FWM_M16	0.893686
ABCA9	HIP_M00	0.263746	TCx_M00	0.31558	PCx_M08	0.414751	FWM_M00	0.297033
ABCB1	HIP_M00	0.256883	TCx_M17	0.472387	PCx_M17	0.465706	FWM_M00	0.360158
ABCB10	HIP_M10	0.697653	TCx_M08	0.609778	PCx_M09	0.699477	FWM_M00	0.385729
ABCB5	HIP_M08	0.493502	TCx_M00	0.355909	PCx_M00	0.338479	FWM_M00	0.23633
ABCB6	HIP_M14	0.510072	TCx_M13	0.491226	PCx_M14	0.64474	FWM_M09	0.671999
ABCB7	HIP_M00	0.377265	TCx_M00	0.311118	PCx_M00	0.376908	FWM_M17	0.531092
ABCB8	HIP_M14	0.795951	TCx_M13	0.775144	PCx_M14	0.724502	FWM_M10	0.650023
ABCB9	HIP_M14	0.6029	TCx_M13	0.681413	PCx_M14	0.775263	FWM_M09	0.872638
ABCC1	HIP_M00	0.332774	TCx_M13	0.423873	PCx_M14	0.5433	FWM_M01	0.687719
ABCC10	HIP_M14	0.482248	TCx_M13	0.546536	PCx_M14	0.574209	FWM_M09	0.519764
ABCC4	HIP_M20	0.593041	TCx_M20	0.635441	PCx_M16	0.537872	FWM_M17	0.769185
ABCC5	HIP_M05	0.4387	TCx_M10	0.424806	PCx_M03	0.474182	FWM_M01	0.463481
ABCC8	HIP_M01	0.583094	TCx_M00	0.378718	PCx_M02	0.421368	FWM_M01	0.900108
ABCC9	HIP_M15	0.522142	TCx_M18	0.428924	PCx_M16	0.432014	FWM_M00	0.259721
ABCD2	HIP_M10	0.637429	TCx_M08	0.567847	PCx_M09	0.47078	FWM_M01	0.900719
ABCD3	HIP_M06	0.556455	TCx_M15	0.684411	PCx_M16	0.789714	FWM_M15	0.806546
ABCD4	HIP_M15	0.492704	TCx_M18	0.480608	PCx_M18	0.53566	FWM_M12	0.681817
ABCE1	HIP_M06	0.783126	TCx_M04	0.619861	PCx_M16	0.684696	FWM_M15	0.490031
ABCF1	HIP_M09	0.404912	TCx_M00	0.396452	PCx_M07	0.628807	FWM_M04	0.48669
ABCF2	HIP_M05	0.444081	TCx_M04	0.591514	PCx_M00	0.265558	FWM_M01	0.748383
ABCF3	HIP_M02	0.485484	TCx_M02	0.596533	PCx_M03	0.592767	FWM_M09	0.734683
ABCG1	HIP_M03	0.410346	TCx_M00	0.3131	PCx_M00	0.274432	FWM_M12	0.530319
ABCG2	HIP_M00	0.316751	TCx_M00	0.263148	PCx_M00	0.330955	FWM_M00	0.376939
ABCG4	HIP_M02	0.631041	TCx_M02	0.655626	PCx_M03	0.48126	FWM_M01	0.94717
ABHD10	HIP_M10	0.714388	TCx_M04	0.74112	PCx_M09	0.674691	FWM_M00	0.399624
ABHD11	HIP_M08	0.464187	TCx_M15	0.415944	PCx_M01	0.506748	FWM_M00	0.318758
ABHD12	HIP_M02	0.612016	TCx_M03	0.582103	PCx_M00	0.293379	FWM_M00	0.371654
ABHD12B	HIP_M00	0.290943	TCx_M00	0.218034	PCx_M00	0.297035	FWM_M01	0.590796
ABHD13	HIP_M10	0.851994	TCx_M08	0.834987	PCx_M09	0.735095	FWM_M01	0.527792
ABHD14A	HIP_M02	0.50697	TCx_M02	0.581811	PCx_M14	0.472607	FWM_M09	0.81624
ABHD14B	HIP_M15	0.612446	TCx_M15	0.452234	PCx_M16	0.419135	FWM_M15	0.464404
ABHD15	HIP_M16	0.57322	TCx_M16	0.745853	PCx_M00	0.304329	FWM_M12	0.664375
ABHD16A	HIP_M14	0.559581	TCx_M02	0.50561	PCx_M14	0.521384	FWM_M08	0.616845
ABHD17A	HIP_M14	0.948508	TCx_M13	0.953999	PCx_M14	0.935205	FWM_M08	0.939517
ABHD17B	HIP_M19	0.601416	TCx_M19	0.638474	PCx_M19	0.766614	FWM_M15	0.869029
ABHD17C	HIP_M05	0.418305	TCx_M17	0.409637	PCx_M00	0.370261	FWM_M01	0.650701
ABHD2	HIP_M02	0.539025	TCx_M00	0.354224	PCx_M00	0.357975	FWM_M01	0.791268
ABHD3	HIP_M12	0.743309	TCx_M10	0.680173	PCx_M11	0.603888	FWM_M06	0.757318
ABHD4	HIP_M16	0.667869	TCx_M19	0.511889	PCx_M17	0.754813	FWM_M16	0.768692
ABHD5	HIP_M19	0.441168	TCx_M19	0.413229	PCx_M19	0.5413	FWM_M15	0.778108
ABHD6	HIP_M05	0.585018	TCx_M10	0.414223	PCx_M11	0.481019	FWM_M16	0.729588
ABHD8	HIP_M14	0.891608	TCx_M13	0.855652	PCx_M14	0.882701	FWM_M09	0.884925
ABI1	HIP_M02	0.734494	TCx_M08	0.576874	PCx_M00	0.393069	FWM_M01	0.503591
ABI2	HIP_M02	0.734102	TCx_M08	0.796147	PCx_M09	0.624573	FWM_M01	0.885586
ABI3	HIP_M20	0.860938	TCx_M20	0.645239	PCx_M20	0.757475	FWM_M17	0.845462
ABI3BP	HIP_M17	0.61658	TCx_M17	0.472218	PCx_M13	0.441105	FWM_M15	0.771215
ABL1	HIP_M14	0.738592	TCx_M16	0.817439	PCx_M19	0.580721	FWM_M12	0.944275
ABL2	HIP_M05	0.691823	TCx_M03	0.554606	PCx_M03	0.503258	FWM_M01	0.498271
ABLIM1	HIP_M00	0.392393	TCx_M17	0.703588	PCx_M17	0.553786	FWM_M01	0.492401
ABLIM2	HIP_M03	0.490182	TCx_M02	0.641938	PCx_M03	0.674692	FWM_M01	0.962653
ABLIM3	HIP_M00	0.329859	TCx_M00	0.255753	PCx_M00	0.31931	FWM_M01	0.42419
ABR	HIP_M00	0.288697	TCx_M02	0.481001	PCx_M14	0.404541	FWM_M01	0.88705
ABRACL	HIP_M10	0.629632	TCx_M04	0.614732	PCx_M03	0.413953	FWM_M01	0.836471
ABT1	HIP_M00	0.349057	TCx_M00	0.342957	PCx_M04	0.687439	FWM_M08	0.542677
ABTB1	HIP_M14	0.700827	TCx_M13	0.728903	PCx_M14	0.738937	FWM_M09	0.773117
ABTB2	HIP_M16	0.458005	TCx_M16	0.715039	PCx_M00	0.332705	FWM_M12	0.701911
ACAA1	HIP_M15	0.628017	TCx_M13	0.405595	PCx_M16	0.552972	FWM_M12	0.804996
ACAA2	HIP_M15	0.785059	TCx_M15	0.703708	PCx_M16	0.764548	FWM_M15	0.772337
ACACA	HIP_M02	0.694965	TCx_M03	0.494571	PCx_M03	0.502127	FWM_M01	0.762645
ACACB	HIP_M17	0.634506	TCx_M19	0.401023	PCx_M19	0.481807	FWM_M12	0.691414
ACAD10	HIP_M00	0.399698	TCx_M00	0.305253	PCx_M00	0.323967	FWM_M12	0.783978
ACAD11	HIP_M00	0.27181	TCx_M19	0.451498	PCx_M19	0.443074	FWM_M16	0.735495
ACAD8	HIP_M00	0.373839	TCx_M04	0.478943	PCx_M00	0.370733	FWM_M09	0.439907
ACAD9	HIP_M06	0.527274	TCx_M15	0.467967	PCx_M16	0.467123	FWM_M00	0.324591
ACADL	HIP_M15	0.563202	TCx_M00	0.390685	PCx_M13	0.510861	FWM_M07	0.535336
ACADM	HIP_M10	0.606088	TCx_M15	0.535125	PCx_M09	0.647006	FWM_M00	0.180627
ACADS	HIP_M15	0.762466	TCx_M13	0.638334	PCx_M14	0.59122	FWM_M10	0.803093
ACADSB	HIP_M06	0.537697	TCx_M15	0.683114	PCx_M16	0.751098	FWM_M00	0.309601
ACADVL	HIP_M16	0.538366	TCx_M00	0.370476	PCx_M00	0.279376	FWM_M12	0.52808
ACAP2	HIP_M10	0.7001	TCx_M08	0.664685	PCx_M09	0.711429	FWM_M00	0.340014
ACAP3	HIP_M14	0.873838	TCx_M13	0.91215	PCx_M14	0.913003	FWM_M08	0.833436
ACAT1	HIP_M15	0.577753	TCx_M15	0.581309	PCx_M16	0.67326	FWM_M00	0.349607
ACAT2	HIP_M06	0.615327	TCx_M04	0.645123	PCx_M04	0.582184	FWM_M00	0.279538
ACBD3	HIP_M10	0.730033	TCx_M08	0.778382	PCx_M09	0.767765	FWM_M02	0.412509
ACBD4	HIP_M15	0.438461	TCx_M13	0.430556	PCx_M00	0.337239	FWM_M09	0.44341
ACBD5	HIP_M19	0.516291	TCx_M08	0.538411	PCx_M09	0.657131	FWM_M15	0.775094
ACBD6	HIP_M06	0.418854	TCx_M00	0.220902	PCx_M04	0.486905	FWM_M00	0.321901
ACBD7	HIP_M15	0.510284	TCx_M15	0.580455	PCx_M16	0.605696	FWM_M01	0.494686
ACCS	HIP_M15	0.603502	TCx_M15	0.602528	PCx_M16	0.716606	FWM_M00	0.20862
ACD	HIP_M14	0.705034	TCx_M13	0.76987	PCx_M14	0.750347	FWM_M09	0.712457
ACER1	HIP_M00	0.270271	TCx_M00	0.242738	PCx_M00	0.367403	FWM_M00	0.326647
ACER2	HIP_M12	0.470829	TCx_M00	0.363709	PCx_M11	0.468095	FWM_M00	0.381737
ACER3	HIP_M19	0.564301	TCx_M19	0.581538	PCx_M19	0.684365	FWM_M16	0.883551
ACHE	HIP_M14	0.575218	TCx_M13	0.6873	PCx_M14	0.6872	FWM_M09	0.840191
ACIN1	HIP_M12	0.529465	TCx_M10	0.530491	PCx_M11	0.555347	FWM_M06	0.648066
ACKR1	HIP_M00	0.330807	TCx_M18	0.52358	PCx_M00	0.331075	FWM_M00	0.285317
ACKR3	HIP_M18	0.598763	TCx_M17	0.595631	PCx_M00	0.321085	FWM_M00	0.30415
ACKR4	HIP_M00	0.271833	TCx_M07	0.44716	PCx_M09	0.411831	FWM_M00	0.155368
ACLY	HIP_M06	0.616547	TCx_M04	0.753901	PCx_M04	0.606976	FWM_M00	0.386239
ACO1	HIP_M00	0.368466	TCx_M00	0.21828	PCx_M00	0.283803	FWM_M01	0.457356
ACO2	HIP_M06	0.464169	TCx_M02	0.767488	PCx_M14	0.612737	FWM_M09	0.520406
ACOT1	HIP_M00	0.234828	TCx_M00	0.172241	PCx_M00	0.225932	FWM_M00	0.154527
ACOT11	HIP_M15	0.723535	TCx_M13	0.634271	PCx_M14	0.518089	FWM_M08	0.526067
ACOT13	HIP_M05	0.449939	TCx_M08	0.509433	PCx_M09	0.466808	FWM_M00	0.232188
ACOT2	HIP_M00	0.236213	TCx_M00	0.190888	PCx_M04	0.403288	FWM_M01	0.494242
ACOT4	HIP_M00	0.138333	TCx_M00	0.288172	PCx_M00	0.278475	FWM_M01	0.795351
ACOT6	HIP_M00	0.214776	TCx_M10	0.517734	PCx_M11	0.424168	FWM_M01	0.668087
ACOT7	HIP_M02	0.646024	TCx_M02	0.822818	PCx_M14	0.665224	FWM_M01	0.926063
ACOT8	HIP_M14	0.518198	TCx_M13	0.579344	PCx_M14	0.624809	FWM_M09	0.657718
ACOT9	HIP_M06	0.588712	TCx_M15	0.554426	PCx_M04	0.601547	FWM_M01	0.707621
ACOX1	HIP_M15	0.60781	TCx_M15	0.651866	PCx_M16	0.733223	FWM_M00	0.120741
ACOX2	HIP_M16	0.456216	TCx_M17	0.616419	PCx_M00	0.361585	FWM_M00	0.148157
ACOX3	HIP_M14	0.532329	TCx_M13	0.42276	PCx_M00	0.387349	FWM_M08	0.57781
ACP1	HIP_M06	0.66025	TCx_M04	0.86979	PCx_M04	0.612637	FWM_M00	0.23498
ACP2	HIP_M06	0.758102	TCx_M15	0.695489	PCx_M16	0.725628	FWM_M00	0.391326
ACP6	HIP_M00	0.392208	TCx_M00	0.22123	PCx_M00	0.203105	FWM_M00	0.258369
ACRC	HIP_M12	0.748586	TCx_M10	0.864255	PCx_M11	0.892098	FWM_M06	0.774538
ACSBG1	HIP_M15	0.788207	TCx_M15	0.644485	PCx_M16	0.597848	FWM_M00	0.233697
ACSF2	HIP_M15	0.643426	TCx_M17	0.669377	PCx_M17	0.565218	FWM_M00	0.37037
ACSF3	HIP_M14	0.635345	TCx_M13	0.692443	PCx_M14	0.645802	FWM_M08	0.657201
ACSL1	HIP_M18	0.670199	TCx_M18	0.640659	PCx_M19	0.63976	FWM_M16	0.882022
ACSL3	HIP_M10	0.710718	TCx_M08	0.71157	PCx_M09	0.519927	FWM_M01	0.600621
ACSL4	HIP_M02	0.806177	TCx_M08	0.868681	PCx_M09	0.712391	FWM_M00	0.257712
ACSL5	HIP_M18	0.58814	TCx_M18	0.636855	PCx_M18	0.621999	FWM_M13	0.634083
ACSL6	HIP_M02	0.690627	TCx_M04	0.601205	PCx_M09	0.476616	FWM_M01	0.883267
ACSM5	HIP_M15	0.731696	TCx_M17	0.621275	PCx_M16	0.597723	FWM_M15	0.564494
ACSS1	HIP_M15	0.640326	TCx_M16	0.467521	PCx_M00	0.392641	FWM_M15	0.547549
ACSS2	HIP_M19	0.473497	TCx_M19	0.562101	PCx_M19	0.539152	FWM_M15	0.893479
ACSS3	HIP_M15	0.587473	TCx_M17	0.672458	PCx_M00	0.374886	FWM_M00	0.0909088
ACTA2	HIP_M00	0.199847	TCx_M12	0.928206	PCx_M13	0.903034	FWM_M07	0.91309
ACTA2-AS1	HIP_M00	0.363092	TCx_M00	0.386771	PCx_M03	0.496373	FWM_M01	0.873514
ACTB	HIP_M06	0.59006	TCx_M15	0.52121	PCx_M04	0.581224	FWM_M14	0.486617
ACTBP3	HIP_M04	0.533917	TCx_M00	0.227223	PCx_M00	0.267327	FWM_M00	0.245903
ACTBP4	HIP_M00	0.338911	TCx_M00	0.295865	PCx_M00	0.329252	FWM_M16	0.446136
ACTBP7	HIP_M19	0.496841	TCx_M19	0.524664	PCx_M00	0.311642	FWM_M16	0.793614
ACTG1	HIP_M06	0.701448	TCx_M15	0.67921	PCx_M04	0.715297	FWM_M10	0.501768
ACTG1P12	HIP_M01	0.638264	TCx_M01	0.542067	PCx_M03	0.45834	FWM_M01	0.898414
ACTG1P17	HIP_M08	0.432564	TCx_M00	0.323508	PCx_M01	0.638731	FWM_M00	0.290168
ACTG1P18	HIP_M01	0.563329	TCx_M00	0.160881	PCx_M00	0.318031	FWM_M01	0.879653
ACTG1P20	HIP_M00	0.207557	TCx_M00	0.238701	PCx_M00	0.39793	FWM_M00	0.143919
ACTG1P3	HIP_M00	0.380205	TCx_M00	0.293176	PCx_M00	0.377433	FWM_M00	0.235259
ACTG1P4	HIP_M15	0.405879	TCx_M15	0.486295	PCx_M16	0.489154	FWM_M00	0.333454
ACTL6A	HIP_M20	0.440878	TCx_M19	0.563907	PCx_M19	0.548941	FWM_M16	0.889594
ACTL6B	HIP_M02	0.791319	TCx_M01	0.805081	PCx_M03	0.6719	FWM_M01	0.947527
ACTN1	HIP_M05	0.449069	TCx_M13	0.416294	PCx_M14	0.545834	FWM_M01	0.865945
ACTN2	HIP_M02	0.536671	TCx_M01	0.616149	PCx_M00	0.352452	FWM_M00	0.262118
ACTN4	HIP_M14	0.799622	TCx_M13	0.80864	PCx_M14	0.772458	FWM_M10	0.876409
ACTR10	HIP_M06	0.832864	TCx_M04	0.836335	PCx_M16	0.551828	FWM_M01	0.571428
ACTR1A	HIP_M02	0.696006	TCx_M04	0.742755	PCx_M04	0.428794	FWM_M01	0.621259
ACTR1B	HIP_M06	0.640561	TCx_M02	0.591518	PCx_M14	0.48601	FWM_M09	0.686762
ACTR2	HIP_M10	0.760309	TCx_M08	0.654106	PCx_M09	0.682338	FWM_M01	0.534549
ACTR3	HIP_M10	0.729263	TCx_M08	0.723838	PCx_M09	0.687307	FWM_M02	0.5102
ACTR3B	HIP_M04	0.738888	TCx_M04	0.772032	PCx_M03	0.472194	FWM_M01	0.882292
ACTR3C	HIP_M05	0.548863	TCx_M10	0.630373	PCx_M11	0.654203	FWM_M01	0.866753
ACTR5	HIP_M00	0.306368	TCx_M00	0.301627	PCx_M00	0.188635	FWM_M12	0.565045
ACTR6	HIP_M10	0.703066	TCx_M04	0.660392	PCx_M09	0.620771	FWM_M00	0.267139
ACTR8	HIP_M02	0.444444	TCx_M00	0.387705	PCx_M00	0.152438	FWM_M00	0.144223
ACVR1	HIP_M05	0.702473	TCx_M17	0.513332	PCx_M17	0.58397	FWM_M07	0.45813
ACVR1B	HIP_M02	0.628034	TCx_M03	0.700008	PCx_M03	0.670831	FWM_M01	0.937846
ACVR1C	HIP_M02	0.712262	TCx_M08	0.660859	PCx_M09	0.513037	FWM_M00	0.234094
ACVR2A	HIP_M05	0.510611	TCx_M01	0.59721	PCx_M00	0.334797	FWM_M01	0.618714
ACVR2B	HIP_M19	0.569289	TCx_M08	0.514188	PCx_M09	0.435442	FWM_M16	0.659613
ACVRL1	HIP_M00	0.386496	TCx_M17	0.649606	PCx_M17	0.749291	FWM_M07	0.46713
ACY1	HIP_M15	0.457382	TCx_M00	0.294994	PCx_M00	0.278034	FWM_M15	0.47839
ACY3	HIP_M15	0.440995	TCx_M00	0.260377	PCx_M00	0.24425	FWM_M00	0.336155
ACYP1	HIP_M02	0.437265	TCx_M01	0.552883	PCx_M00	0.265244	FWM_M00	0.345474
ACYP2	HIP_M10	0.707917	TCx_M08	0.697658	PCx_M09	0.583435	FWM_M00	0.252086
ADA	HIP_M00	0.379323	TCx_M18	0.4007	PCx_M04	0.436152	FWM_M15	0.682991
ADAL	HIP_M00	0.329962	TCx_M00	0.224166	PCx_M00	0.167768	FWM_M00	0.231685
ADAM10	HIP_M10	0.65487	TCx_M19	0.46658	PCx_M19	0.587311	FWM_M16	0.860613
ADAM11	HIP_M02	0.562372	TCx_M02	0.825478	PCx_M14	0.753708	FWM_M01	0.939327
ADAM15	HIP_M15	0.554945	TCx_M15	0.450153	PCx_M16	0.504566	FWM_M10	0.67434
ADAM17	HIP_M00	0.22824	TCx_M15	0.431853	PCx_M15	0.46822	FWM_M16	0.536824
ADAM19	HIP_M00	0.276671	TCx_M00	0.382242	PCx_M00	0.347273	FWM_M09	0.499851
ADAM1A	HIP_M00	0.397882	TCx_M00	0.199393	PCx_M00	0.282818	FWM_M00	0.190503
ADAM20	HIP_M00	0.38841	TCx_M01	0.60076	PCx_M03	0.507873	FWM_M01	0.801974
ADAM20P1	HIP_M00	0.398325	TCx_M01	0.547592	PCx_M03	0.48972	FWM_M01	0.823928
ADAM21	HIP_M00	0.385939	TCx_M00	0.297435	PCx_M00	0.373214	FWM_M01	0.812
ADAM22	HIP_M02	0.834793	TCx_M01	0.863795	PCx_M03	0.820978	FWM_M01	0.870068
ADAM23	HIP_M02	0.769472	TCx_M01	0.899545	PCx_M03	0.737722	FWM_M01	0.937834
ADAM28	HIP_M20	0.620812	TCx_M20	0.727446	PCx_M20	0.695019	FWM_M17	0.886155
ADAM32	HIP_M10	0.456706	TCx_M08	0.535194	PCx_M00	0.253784	FWM_M00	0.374684
ADAM33	HIP_M16	0.557926	TCx_M16	0.406321	PCx_M00	0.393662	FWM_M07	0.446657
ADAM9	HIP_M18	0.562604	TCx_M08	0.427326	PCx_M00	0.393946	FWM_M14	0.730943
ADAMTS1	HIP_M18	0.688577	TCx_M18	0.70834	PCx_M18	0.775001	FWM_M02	0.759587
ADAMTS10	HIP_M14	0.690465	TCx_M13	0.747879	PCx_M14	0.695847	FWM_M09	0.816549
ADAMTS13	HIP_M14	0.627301	TCx_M13	0.667462	PCx_M14	0.613418	FWM_M09	0.696345
ADAMTS14	HIP_M19	0.516248	TCx_M19	0.554464	PCx_M19	0.743314	FWM_M15	0.759596
ADAMTS16	HIP_M01	0.860199	TCx_M00	0.206645	PCx_M11	0.534809	FWM_M01	0.84439
ADAMTS18	HIP_M00	0.37931	TCx_M00	0.315908	PCx_M19	0.532636	FWM_M15	0.431093
ADAMTS19	HIP_M01	0.570495	TCx_M14	0.404517	PCx_M00	0.180453	FWM_M01	0.485589
ADAMTS2	HIP_M00	0.317009	TCx_M13	0.469086	PCx_M14	0.45146	FWM_M09	0.618114
ADAMTS3	HIP_M00	0.38558	TCx_M00	0.370222	PCx_M03	0.455456	FWM_M01	0.823106
ADAMTS4	HIP_M19	0.635606	TCx_M19	0.664473	PCx_M19	0.756176	FWM_M15	0.930604
ADAMTS6	HIP_M00	0.25619	TCx_M00	0.193326	PCx_M13	0.428737	FWM_M07	0.509184
ADAMTS8	HIP_M01	0.493516	TCx_M02	0.423455	PCx_M14	0.499196	FWM_M09	0.458734
ADAMTS9	HIP_M18	0.76699	TCx_M18	0.826028	PCx_M18	0.848155	FWM_M13	0.896498
ADAMTS9-AS2	HIP_M16	0.625647	TCx_M00	0.265184	PCx_M00	0.329186	FWM_M00	0.389706
ADAMTSL2	HIP_M14	0.517761	TCx_M13	0.784803	PCx_M14	0.752048	FWM_M08	0.705621
ADAMTSL3	HIP_M16	0.616833	TCx_M19	0.531571	PCx_M19	0.628249	FWM_M16	0.862458
ADAP1	HIP_M14	0.813149	TCx_M13	0.911258	PCx_M14	0.913176	FWM_M08	0.817148
ADAP2	HIP_M20	0.671019	TCx_M20	0.713991	PCx_M20	0.635295	FWM_M17	0.782385
ADAR	HIP_M05	0.541319	TCx_M03	0.553937	PCx_M03	0.481906	FWM_M01	0.714483
ADARB1	HIP_M01	0.773499	TCx_M01	0.627184	PCx_M03	0.707548	FWM_M01	0.936985
ADARB2	HIP_M19	0.627109	TCx_M19	0.516413	PCx_M19	0.659007	FWM_M16	0.780084
ADARB2-AS1	HIP_M14	0.411213	TCx_M00	0.261675	PCx_M00	0.226554	FWM_M00	0.312052
ADAT1	HIP_M00	0.310514	TCx_M00	0.24841	PCx_M00	0.325911	FWM_M15	0.459604
ADAT2	HIP_M06	0.513919	TCx_M15	0.555049	PCx_M16	0.540665	FWM_M00	0.251027
ADCK1	HIP_M19	0.422993	TCx_M15	0.445126	PCx_M16	0.544685	FWM_M15	0.644546
ADCK2	HIP_M14	0.421312	TCx_M00	0.397619	PCx_M11	0.424655	FWM_M08	0.483091
ADCK3	HIP_M14	0.651084	TCx_M13	0.561902	PCx_M14	0.432832	FWM_M10	0.594108
ADCK4	HIP_M14	0.707441	TCx_M13	0.811985	PCx_M14	0.697729	FWM_M10	0.770523
ADCK5	HIP_M14	0.693891	TCx_M13	0.830847	PCx_M14	0.857212	FWM_M09	0.784754
ADCY1	HIP_M01	0.629576	TCx_M02	0.701252	PCx_M03	0.608872	FWM_M01	0.943684
ADCY10P1	HIP_M12	0.42794	TCx_M19	0.582925	PCx_M19	0.521952	FWM_M16	0.883386
ADCY2	HIP_M17	0.504455	TCx_M17	0.563475	PCx_M00	0.339027	FWM_M01	0.612765
ADCY3	HIP_M14	0.656345	TCx_M13	0.565706	PCx_M14	0.581198	FWM_M09	0.560687
ADCY5	HIP_M14	0.546553	TCx_M13	0.717961	PCx_M14	0.652021	FWM_M08	0.564107
ADCY6	HIP_M14	0.459677	TCx_M13	0.614484	PCx_M14	0.622663	FWM_M01	0.864812
ADCY7	HIP_M16	0.561399	TCx_M10	0.569156	PCx_M11	0.484031	FWM_M17	0.732117
ADCY8	HIP_M17	0.508408	TCx_M15	0.40446	PCx_M00	0.299733	FWM_M00	0.274262
ADCY9	HIP_M12	0.502425	TCx_M13	0.513053	PCx_M11	0.605524	FWM_M01	0.852369
ADCYAP1	HIP_M03	0.541208	TCx_M14	0.558636	PCx_M15	0.50631	FWM_M01	0.805548
ADCYAP1R1	HIP_M15	0.448549	TCx_M17	0.715677	PCx_M17	0.761131	FWM_M01	0.456748
ADD1	HIP_M06	0.4081	TCx_M15	0.456078	PCx_M16	0.538212	FWM_M15	0.461004
ADD2	HIP_M02	0.784778	TCx_M01	0.810655	PCx_M03	0.719018	FWM_M01	0.949148
ADD3	HIP_M15	0.675701	TCx_M17	0.700752	PCx_M17	0.74532	FWM_M15	0.738912
ADGRA1	HIP_M04	0.554079	TCx_M02	0.544398	PCx_M14	0.595919	FWM_M01	0.914469
ADGRA2	HIP_M14	0.543634	TCx_M16	0.537207	PCx_M14	0.552318	FWM_M09	0.556146
ADGRA3	HIP_M15	0.496193	TCx_M17	0.565064	PCx_M00	0.181642	FWM_M00	0.0711353
ADGRB1	HIP_M14	0.762023	TCx_M13	0.815867	PCx_M14	0.815118	FWM_M09	0.87947
ADGRB2	HIP_M14	0.796938	TCx_M13	0.843097	PCx_M14	0.87868	FWM_M09	0.941285
ADGRB3	HIP_M04	0.776768	TCx_M01	0.609155	PCx_M03	0.400059	FWM_M01	0.85071
ADGRD1	HIP_M00	0.303816	TCx_M17	0.64068	PCx_M17	0.636961	FWM_M00	0.396946
ADGRE2	HIP_M20	0.681374	TCx_M18	0.729	PCx_M18	0.706713	FWM_M14	0.748582
ADGRE5	HIP_M19	0.491097	TCx_M19	0.51356	PCx_M19	0.575698	FWM_M15	0.852579
ADGRF5	HIP_M00	0.28971	TCx_M17	0.6958	PCx_M17	0.791605	FWM_M07	0.461831
ADGRF5P1	HIP_M00	0.279248	TCx_M00	0.168307	PCx_M00	0.152056	FWM_M00	0.254135
ADGRG1	HIP_M18	0.573444	TCx_M18	0.471595	PCx_M18	0.523838	FWM_M13	0.724217
ADGRL1	HIP_M14	0.761601	TCx_M13	0.720398	PCx_M14	0.845081	FWM_M09	0.90484
ADGRL2	HIP_M05	0.570348	TCx_M01	0.834342	PCx_M03	0.85402	FWM_M01	0.960049
ADGRL3	HIP_M05	0.496397	TCx_M04	0.517066	PCx_M00	0.392855	FWM_M01	0.888487
ADGRL4	HIP_M00	0.24661	TCx_M17	0.568711	PCx_M17	0.525314	FWM_M07	0.487767
ADGRV1	HIP_M00	0.200617	TCx_M17	0.699203	PCx_M00	0.381746	FWM_M01	0.484833
ADH1B	HIP_M00	0.358864	TCx_M12	0.696519	PCx_M13	0.647315	FWM_M07	0.778679
ADH5	HIP_M06	0.583823	TCx_M04	0.626683	PCx_M04	0.571838	FWM_M01	0.461857
ADH5P3	HIP_M00	0.272815	TCx_M00	0.241651	PCx_M00	0.228274	FWM_M01	0.811008
ADHFE1	HIP_M15	0.789755	TCx_M15	0.739741	PCx_M16	0.81456	FWM_M15	0.595077
ADI1	HIP_M00	0.344635	TCx_M17	0.590654	PCx_M00	0.370382	FWM_M00	0.375253
ADIPOR1	HIP_M00	0.35505	TCx_M00	0.341171	PCx_M04	0.468978	FWM_M02	0.689716
ADIPOR2	HIP_M16	0.591282	TCx_M19	0.766173	PCx_M19	0.799987	FWM_M16	0.958719
ADIRF	HIP_M15	0.588617	TCx_M15	0.493512	PCx_M04	0.477236	FWM_M10	0.558376
ADK	HIP_M10	0.647259	TCx_M08	0.545564	PCx_M09	0.516209	FWM_M01	0.596901
ADM	HIP_M18	0.642099	TCx_M18	0.496091	PCx_M18	0.609549	FWM_M11	0.849383
ADNP	HIP_M05	0.644568	TCx_M10	0.584291	PCx_M11	0.615616	FWM_M06	0.645283
ADNP-AS1	HIP_M00	0.384662	TCx_M08	0.464087	PCx_M09	0.428692	FWM_M00	0.335553
ADNP2	HIP_M00	0.371352	TCx_M10	0.493922	PCx_M15	0.585779	FWM_M00	0.293276
ADO	HIP_M10	0.428352	TCx_M08	0.649	PCx_M09	0.470985	FWM_M15	0.594011
ADORA1	HIP_M00	0.387101	TCx_M13	0.528012	PCx_M00	0.371477	FWM_M10	0.518498
ADORA2B	HIP_M04	0.524894	TCx_M18	0.428508	PCx_M18	0.414856	FWM_M01	0.574499
ADORA3	HIP_M20	0.748909	TCx_M20	0.749993	PCx_M20	0.642562	FWM_M17	0.854773
ADPGK	HIP_M06	0.545019	TCx_M15	0.528884	PCx_M16	0.458655	FWM_M02	0.708054
ADPRHL1	HIP_M12	0.574614	TCx_M00	0.324979	PCx_M00	0.316994	FWM_M01	0.909357
ADPRHL2	HIP_M18	0.435556	TCx_M00	0.327664	PCx_M00	0.355545	FWM_M10	0.672502
ADPRM	HIP_M00	0.300486	TCx_M15	0.409167	PCx_M16	0.487796	FWM_M15	0.50066
ADRA1A	HIP_M01	0.855776	TCx_M00	0.290925	PCx_M01	0.551269	FWM_M00	0.221499
ADRA1B	HIP_M01	0.747311	TCx_M00	0.391962	PCx_M11	0.458497	FWM_M01	0.86243
ADRA1D	HIP_M04	0.661548	TCx_M02	0.447318	PCx_M00	0.238943	FWM_M01	0.563104
ADRB1	HIP_M04	0.421654	TCx_M14	0.461984	PCx_M15	0.63735	FWM_M01	0.902637
ADRB2	HIP_M00	0.295163	TCx_M16	0.570314	PCx_M00	0.335683	FWM_M16	0.781791
ADRBK1	HIP_M14	0.654438	TCx_M13	0.723663	PCx_M14	0.763482	FWM_M01	0.909283
ADRBK2	HIP_M02	0.791884	TCx_M03	0.86114	PCx_M03	0.780254	FWM_M01	0.93338
ADRM1	HIP_M14	0.793398	TCx_M13	0.816775	PCx_M14	0.767302	FWM_M08	0.8136
ADSL	HIP_M05	0.405574	TCx_M00	0.329192	PCx_M04	0.53576	FWM_M00	0.212155
ADSS	HIP_M10	0.585199	TCx_M08	0.518542	PCx_M16	0.549449	FWM_M15	0.677955
ADSSL1	HIP_M00	0.395642	TCx_M15	0.420896	PCx_M16	0.578325	FWM_M15	0.64555
ADTRP	HIP_M03	0.61332	TCx_M00	0.314167	PCx_M00	0.342327	FWM_M01	0.68742
AEBP1	HIP_M16	0.758688	TCx_M18	0.425922	PCx_M18	0.48648	FWM_M06	0.468009
AEBP2	HIP_M10	0.802372	TCx_M08	0.865205	PCx_M09	0.771746	FWM_M00	0.38535
AEN	HIP_M18	0.548769	TCx_M16	0.63324	PCx_M18	0.456064	FWM_M13	0.419169
AES	HIP_M04	0.499576	TCx_M02	0.7296	PCx_M14	0.60598	FWM_M01	0.905556
AFAP1	HIP_M00	0.368459	TCx_M14	0.507063	PCx_M00	0.319008	FWM_M01	0.575605
AFAP1L1	HIP_M12	0.463549	TCx_M00	0.214135	PCx_M00	0.347408	FWM_M00	0.310958
AFAP1L2	HIP_M12	0.499587	TCx_M16	0.411823	PCx_M00	0.371386	FWM_M00	0.347318
AFF1	HIP_M16	0.507924	TCx_M17	0.559675	PCx_M07	0.521311	FWM_M16	0.631915
AFF2	HIP_M02	0.692767	TCx_M01	0.653656	PCx_M03	0.639768	FWM_M01	0.946455
AFF3	HIP_M02	0.598301	TCx_M07	0.425281	PCx_M11	0.505016	FWM_M01	0.920047
AFF4	HIP_M10	0.694989	TCx_M08	0.660238	PCx_M09	0.52685	FWM_M11	0.571858
AFG3L1P	HIP_M09	0.47353	TCx_M07	0.616884	PCx_M07	0.542283	FWM_M16	0.718443
AFG3L2	HIP_M06	0.763087	TCx_M04	0.86481	PCx_M04	0.559268	FWM_M01	0.574106
AFG3L2P1	HIP_M09	0.700786	TCx_M07	0.688555	PCx_M08	0.73857	FWM_M04	0.550982
AFMID	HIP_M19	0.734917	TCx_M19	0.693552	PCx_M19	0.655516	FWM_M15	0.899436
AFTPH	HIP_M05	0.742451	TCx_M03	0.618836	PCx_M03	0.440157	FWM_M01	0.605776
AGA	HIP_M15	0.774106	TCx_M15	0.65337	PCx_M16	0.770277	FWM_M15	0.782404
AGAP1	HIP_M12	0.423879	TCx_M10	0.475339	PCx_M11	0.478488	FWM_M16	0.719872
AGAP1-IT1	HIP_M00	0.244111	TCx_M00	0.378412	PCx_M19	0.50636	FWM_M15	0.640567
AGAP2	HIP_M14	0.497783	TCx_M13	0.709773	PCx_M14	0.746145	FWM_M01	0.924938
AGAP3	HIP_M14	0.800178	TCx_M13	0.851921	PCx_M14	0.860391	FWM_M09	0.915388
AGAP4	HIP_M09	0.46532	TCx_M00	0.348581	PCx_M00	0.332414	FWM_M00	0.27553
AGAP5	HIP_M00	0.221099	TCx_M00	0.388742	PCx_M00	0.342045	FWM_M16	0.490598
AGAP6	HIP_M00	0.376665	TCx_M15	0.401183	PCx_M16	0.429515	FWM_M00	0.262299
AGAP7P	HIP_M00	0.222462	TCx_M00	0.177845	PCx_M00	0.198858	FWM_M00	0.056947
AGAP9	HIP_M00	0.164764	TCx_M00	0.300715	PCx_M00	0.376856	FWM_M00	0.255436
AGBL3	HIP_M15	0.409348	TCx_M15	0.609447	PCx_M16	0.645108	FWM_M15	0.614393
AGBL4	HIP_M02	0.731788	TCx_M01	0.839395	PCx_M03	0.646921	FWM_M01	0.951675
AGBL5	HIP_M00	0.205088	TCx_M00	0.253757	PCx_M00	0.376045	FWM_M00	0.174978
AGFG1	HIP_M10	0.882288	TCx_M08	0.852976	PCx_M09	0.802154	FWM_M00	0.227453
AGFG2	HIP_M16	0.481474	TCx_M16	0.718669	PCx_M00	0.366128	FWM_M09	0.440414
AGGF1	HIP_M10	0.682089	TCx_M04	0.676585	PCx_M09	0.536752	FWM_M00	0.277623
AGK	HIP_M06	0.668079	TCx_M04	0.706915	PCx_M16	0.546181	FWM_M01	0.531089
AGKP1	HIP_M11	0.989335	TCx_M09	0.991272	PCx_M10	0.98989	FWM_M05	0.984987
AGL	HIP_M06	0.739223	TCx_M15	0.779538	PCx_M16	0.871587	FWM_M00	0.239892
AGMAT	HIP_M00	0.239298	TCx_M00	0.172603	PCx_M01	0.507626	FWM_M00	0.165701
AGMO	HIP_M19	0.582433	TCx_M19	0.574703	PCx_M19	0.538609	FWM_M16	0.703946
AGO1	HIP_M09	0.647453	TCx_M07	0.577957	PCx_M07	0.57848	FWM_M04	0.547349
AGO2	HIP_M16	0.517098	TCx_M19	0.460452	PCx_M15	0.516017	FWM_M16	0.880997
AGO3	HIP_M12	0.584289	TCx_M10	0.582876	PCx_M11	0.496749	FWM_M16	0.911235
AGO4	HIP_M15	0.476532	TCx_M15	0.553923	PCx_M16	0.603523	FWM_M15	0.515069
AGPAT1	HIP_M00	0.394383	TCx_M14	0.415809	PCx_M00	0.254641	FWM_M01	0.49789
AGPAT2	HIP_M14	0.636885	TCx_M13	0.758028	PCx_M14	0.755481	FWM_M09	0.720478
AGPAT3	HIP_M14	0.655748	TCx_M13	0.595679	PCx_M14	0.596001	FWM_M09	0.730846
AGPAT4	HIP_M06	0.527525	TCx_M19	0.514709	PCx_M19	0.435812	FWM_M15	0.861247
AGPAT4-IT1	HIP_M15	0.485886	TCx_M19	0.587659	PCx_M19	0.625291	FWM_M15	0.884954
AGPAT5	HIP_M10	0.596877	TCx_M08	0.631251	PCx_M09	0.702684	FWM_M15	0.623907
AGPAT6	HIP_M16	0.433095	TCx_M00	0.335384	PCx_M00	0.265866	FWM_M13	0.601246
AGPAT9	HIP_M00	0.262378	TCx_M01	0.550472	PCx_M00	0.355782	FWM_M01	0.604123
AGPS	HIP_M10	0.463068	TCx_M00	0.334182	PCx_M00	0.382684	FWM_M15	0.800513
AGRN	HIP_M14	0.788114	TCx_M13	0.911383	PCx_M14	0.89048	FWM_M08	0.799994
AGT	HIP_M15	0.910838	TCx_M15	0.687552	PCx_M16	0.7489	FWM_M15	0.657971
AGTPBP1	HIP_M19	0.636088	TCx_M19	0.534349	PCx_M19	0.734692	FWM_M15	0.901431
AGTRAP	HIP_M18	0.591338	TCx_M18	0.573699	PCx_M19	0.484904	FWM_M12	0.792064
AHCTF1	HIP_M05	0.720997	TCx_M10	0.61336	PCx_M11	0.503071	FWM_M06	0.535207
AHCY	HIP_M14	0.532166	TCx_M13	0.471884	PCx_M04	0.654093	FWM_M10	0.676539
AHCYL1	HIP_M15	0.787883	TCx_M15	0.679154	PCx_M16	0.702646	FWM_M00	0.329368
AHCYL2	HIP_M00	0.253895	TCx_M17	0.611308	PCx_M08	0.40269	FWM_M01	0.604149
AHDC1	HIP_M14	0.85471	TCx_M13	0.851853	PCx_M14	0.871471	FWM_M09	0.883018
AHI1	HIP_M01	0.543526	TCx_M15	0.51847	PCx_M16	0.509153	FWM_M01	0.76083
AHNAK	HIP_M17	0.691468	TCx_M17	0.842252	PCx_M17	0.553659	FWM_M16	0.598137
AHNAK2	HIP_M00	0.390203	TCx_M02	0.731137	PCx_M14	0.546516	FWM_M01	0.896421
AHR	HIP_M18	0.626698	TCx_M18	0.451684	PCx_M09	0.487755	FWM_M15	0.688182
AHSA1	HIP_M12	0.881838	TCx_M10	0.805093	PCx_M11	0.84477	FWM_M06	0.896938
AHSA2	HIP_M12	0.504847	TCx_M10	0.446077	PCx_M00	0.316044	FWM_M16	0.755351
AIDA	HIP_M19	0.41461	TCx_M19	0.462355	PCx_M19	0.526122	FWM_M16	0.765007
AIF1	HIP_M20	0.768554	TCx_M20	0.808575	PCx_M20	0.866798	FWM_M14	0.83599
AIF1L	HIP_M19	0.779252	TCx_M19	0.768478	PCx_M19	0.85488	FWM_M15	0.903484
AIFM1	HIP_M00	0.353956	TCx_M04	0.459805	PCx_M00	0.341596	FWM_M00	0.249125
AIFM2	HIP_M15	0.40237	TCx_M00	0.379589	PCx_M02	0.407733	FWM_M09	0.43577
AIFM3	HIP_M14	0.651035	TCx_M13	0.806702	PCx_M14	0.772361	FWM_M09	0.853091
AIG1	HIP_M06	0.656501	TCx_M15	0.631966	PCx_M16	0.662546	FWM_M15	0.468174
AIMP1	HIP_M06	0.555832	TCx_M08	0.45326	PCx_M09	0.596704	FWM_M15	0.809578
AIMP1P1	HIP_M00	0.338478	TCx_M07	0.431286	PCx_M08	0.540264	FWM_M01	0.73304
AIMP2	HIP_M06	0.488676	TCx_M00	0.291138	PCx_M04	0.493362	FWM_M10	0.457731
AIP	HIP_M14	0.707842	TCx_M13	0.715559	PCx_M14	0.721098	FWM_M10	0.729757
AIPL1	HIP_M00	0.301171	TCx_M00	0.233557	PCx_M00	0.338968	FWM_M00	0.356148
AJAP1	HIP_M02	0.623999	TCx_M10	0.552598	PCx_M11	0.674264	FWM_M01	0.884405
AK1	HIP_M17	0.665234	TCx_M13	0.528118	PCx_M04	0.442595	FWM_M08	0.583448
AK2	HIP_M18	0.62663	TCx_M18	0.533782	PCx_M18	0.46233	FWM_M15	0.877067
AK3	HIP_M00	0.36552	TCx_M00	0.324956	PCx_M09	0.598457	FWM_M16	0.624958
AK3P2	HIP_M11	0.44037	TCx_M00	0.115401	PCx_M00	0.354737	FWM_M00	0.282253
AK3P3	HIP_M00	0.297695	TCx_M00	0.199471	PCx_M00	0.331563	FWM_M00	0.241815
AK3P5	HIP_M12	0.498251	TCx_M10	0.43965	PCx_M11	0.437867	FWM_M00	0.351813
AK3P6	HIP_M09	0.424395	TCx_M07	0.510337	PCx_M08	0.499561	FWM_M01	0.583748
AK4	HIP_M05	0.594733	TCx_M17	0.420466	PCx_M00	0.384782	FWM_M01	0.660397
AK4P1	HIP_M00	0.326472	TCx_M00	0.198812	PCx_M00	0.261549	FWM_M16	0.568659
AK5	HIP_M02	0.704537	TCx_M01	0.544563	PCx_M03	0.497745	FWM_M01	0.663516
AK6	HIP_M10	0.612529	TCx_M04	0.558247	PCx_M09	0.478463	FWM_M00	0.23318
AK7	HIP_M17	0.802513	TCx_M00	0.215262	PCx_M00	0.266376	FWM_M15	0.435303
AK9	HIP_M00	0.343852	TCx_M00	0.309545	PCx_M07	0.555782	FWM_M16	0.607703
AKAP1	HIP_M00	0.352333	TCx_M00	0.380012	PCx_M00	0.21972	FWM_M01	0.520063
AKAP10	HIP_M00	0.274596	TCx_M00	0.324288	PCx_M00	0.322316	FWM_M00	0.292541
AKAP11	HIP_M02	0.743739	TCx_M03	0.549553	PCx_M03	0.479435	FWM_M01	0.766819
AKAP12	HIP_M03	0.490925	TCx_M03	0.582825	PCx_M03	0.472254	FWM_M01	0.903691
AKAP13	HIP_M18	0.438184	TCx_M00	0.325795	PCx_M15	0.458412	FWM_M01	0.566372
AKAP17A	HIP_M14	0.730464	TCx_M13	0.594677	PCx_M14	0.51532	FWM_M10	0.752208
AKAP2	HIP_M00	0.356267	TCx_M00	0.295213	PCx_M09	0.420295	FWM_M00	0.337241
AKAP5	HIP_M04	0.862401	TCx_M08	0.827811	PCx_M03	0.702134	FWM_M01	0.939638
AKAP6	HIP_M02	0.690759	TCx_M01	0.628263	PCx_M03	0.538136	FWM_M01	0.442716
AKAP7	HIP_M10	0.477983	TCx_M00	0.193933	PCx_M00	0.378032	FWM_M02	0.568862
AKAP8	HIP_M00	0.246027	TCx_M00	0.318542	PCx_M00	0.364565	FWM_M10	0.402409
AKAP8L	HIP_M16	0.430742	TCx_M18	0.461144	PCx_M18	0.408097	FWM_M13	0.477256
AKAP9	HIP_M00	0.397868	TCx_M07	0.482739	PCx_M07	0.512215	FWM_M04	0.486966
AKIP1	HIP_M00	0.283759	TCx_M02	0.433646	PCx_M00	0.277803	FWM_M03	0.401517
AKIRIN1	HIP_M05	0.612533	TCx_M14	0.478956	PCx_M15	0.463593	FWM_M15	0.478048
AKIRIN2	HIP_M05	0.641813	TCx_M08	0.410258	PCx_M11	0.455776	FWM_M01	0.450025
AKNA	HIP_M16	0.584163	TCx_M18	0.476229	PCx_M20	0.486233	FWM_M14	0.809783
AKR1A1	HIP_M06	0.777317	TCx_M04	0.598708	PCx_M04	0.609299	FWM_M00	0.338592
AKR1B1	HIP_M00	0.317697	TCx_M04	0.588297	PCx_M00	0.362741	FWM_M17	0.447302
AKR1B15	HIP_M09	0.527898	TCx_M07	0.489293	PCx_M01	0.455255	FWM_M00	0.174558
AKR1B1P6	HIP_M00	0.27906	TCx_M00	0.0828426	PCx_M00	0.280088	FWM_M00	0.368693
AKR1C1	HIP_M16	0.64439	TCx_M00	0.274079	PCx_M00	0.212759	FWM_M00	0.245313
AKR1C2	HIP_M16	0.484861	TCx_M00	0.237426	PCx_M00	0.236497	FWM_M01	0.436947
AKR1C3	HIP_M16	0.70037	TCx_M00	0.340935	PCx_M00	0.299511	FWM_M00	0.245906
AKR1E2	HIP_M00	0.181129	TCx_M00	0.205611	PCx_M00	0.306579	FWM_M01	0.632564
AKR7A2	HIP_M15	0.571949	TCx_M13	0.445182	PCx_M16	0.421987	FWM_M10	0.675432
AKR7A2P1	HIP_M19	0.424797	TCx_M00	0.368802	PCx_M00	0.334276	FWM_M00	0.201493
AKR7A3	HIP_M14	0.456671	TCx_M13	0.560644	PCx_M14	0.447343	FWM_M08	0.447108
AKT1	HIP_M14	0.77882	TCx_M13	0.797476	PCx_M14	0.642765	FWM_M08	0.704574
AKT1S1	HIP_M16	0.587981	TCx_M16	0.488629	PCx_M11	0.574131	FWM_M12	0.610788
AKT2	HIP_M14	0.58644	TCx_M13	0.609642	PCx_M14	0.477999	FWM_M10	0.722512
AKT3	HIP_M02	0.507838	TCx_M04	0.489209	PCx_M00	0.359342	FWM_M00	0.384471
AKTIP	HIP_M05	0.528627	TCx_M08	0.536592	PCx_M00	0.368093	FWM_M00	0.122681
ALAD	HIP_M15	0.614634	TCx_M17	0.521639	PCx_M19	0.642404	FWM_M15	0.827782
ALAS1	HIP_M05	0.464433	TCx_M04	0.615744	PCx_M18	0.407139	FWM_M01	0.466475
ALCAM	HIP_M19	0.680266	TCx_M19	0.653856	PCx_M19	0.822569	FWM_M16	0.912727
ALDH18A1	HIP_M05	0.522212	TCx_M04	0.458731	PCx_M04	0.483844	FWM_M01	0.675931
ALDH1A1	HIP_M15	0.689719	TCx_M15	0.534312	PCx_M16	0.667259	FWM_M15	0.652053
ALDH1A2	HIP_M01	0.491706	TCx_M00	0.341522	PCx_M00	0.329411	FWM_M00	0.393114
ALDH1A3	HIP_M00	0.292327	TCx_M03	0.477515	PCx_M00	0.140827	FWM_M00	0.369056
ALDH1B1	HIP_M20	0.415894	TCx_M00	0.361238	PCx_M13	0.505518	FWM_M09	0.490048
ALDH1L1	HIP_M15	0.693245	TCx_M15	0.647106	PCx_M16	0.61904	FWM_M09	0.422264
ALDH1L2	HIP_M00	0.266204	TCx_M00	0.164615	PCx_M00	0.250621	FWM_M01	0.607527
ALDH2	HIP_M15	0.592287	TCx_M15	0.538378	PCx_M16	0.447519	FWM_M00	0.215886
ALDH3A2	HIP_M00	0.250944	TCx_M00	0.379607	PCx_M00	0.29372	FWM_M13	0.566398
ALDH3B1	HIP_M15	0.438863	TCx_M00	0.312123	PCx_M00	0.224981	FWM_M15	0.643503
ALDH4A1	HIP_M15	0.587838	TCx_M13	0.445115	PCx_M17	0.548447	FWM_M10	0.423757
ALDH5A1	HIP_M06	0.500735	TCx_M04	0.559654	PCx_M16	0.414993	FWM_M01	0.805478
ALDH6A1	HIP_M15	0.572689	TCx_M17	0.636579	PCx_M16	0.548658	FWM_M15	0.707558
ALDH7A1	HIP_M15	0.648285	TCx_M15	0.48617	PCx_M16	0.59975	FWM_M15	0.71011
ALDH7A1P1	HIP_M01	0.673826	TCx_M00	0.32468	PCx_M00	0.364629	FWM_M11	0.411014
ALDH8A1	HIP_M00	0.118502	TCx_M00	0.293654	PCx_M00	0.176477	FWM_M00	0.288336
ALDH9A1	HIP_M15	0.732409	TCx_M15	0.745205	PCx_M16	0.778942	FWM_M15	0.640148
ALDOA	HIP_M14	0.550605	TCx_M02	0.808013	PCx_M14	0.649332	FWM_M01	0.839083
ALDOB	HIP_M00	0.357784	TCx_M00	0.326781	PCx_M00	0.380292	FWM_M01	0.486696
ALDOC	HIP_M06	0.721706	TCx_M15	0.680662	PCx_M16	0.567602	FWM_M01	0.605132
ALG1	HIP_M15	0.440209	TCx_M00	0.359148	PCx_M00	0.349344	FWM_M00	0.262487
ALG10	HIP_M10	0.697358	TCx_M08	0.682864	PCx_M09	0.705697	FWM_M00	0.259597
ALG10B	HIP_M10	0.69428	TCx_M08	0.627541	PCx_M09	0.761394	FWM_M00	0.325317
ALG11	HIP_M00	0.337107	TCx_M00	0.323954	PCx_M00	0.375577	FWM_M15	0.615858
ALG12	HIP_M14	0.749883	TCx_M13	0.622409	PCx_M14	0.578199	FWM_M10	0.716591
ALG13	HIP_M10	0.591583	TCx_M08	0.523705	PCx_M09	0.663131	FWM_M15	0.549654
ALG14	HIP_M06	0.491443	TCx_M15	0.494288	PCx_M16	0.510658	FWM_M15	0.562732
ALG1L12P	HIP_M00	0.240334	TCx_M00	0.226772	PCx_M02	0.917618	FWM_M01	0.614555
ALG1L6P	HIP_M00	0.397518	TCx_M00	0.209575	PCx_M00	0.381309	FWM_M00	0.175068
ALG1L7P	HIP_M00	0.355211	TCx_M00	0.250765	PCx_M01	0.492866	FWM_M00	0.338856
ALG1L8P	HIP_M15	0.407284	TCx_M00	0.261856	PCx_M01	0.578039	FWM_M00	0.0687285
ALG1L9P	HIP_M00	0.363282	TCx_M15	0.55086	PCx_M02	0.841112	FWM_M00	0.351986
ALG2	HIP_M05	0.667577	TCx_M08	0.476432	PCx_M00	0.384455	FWM_M06	0.541629
ALG3	HIP_M00	0.278703	TCx_M00	0.247808	PCx_M00	0.382691	FWM_M00	0.261661
ALG5	HIP_M06	0.636258	TCx_M15	0.577351	PCx_M16	0.627013	FWM_M15	0.792925
ALG6	HIP_M10	0.56518	TCx_M15	0.595953	PCx_M16	0.616037	FWM_M00	0.314012
ALG8	HIP_M00	0.338861	TCx_M00	0.298966	PCx_M00	0.304046	FWM_M02	0.421906
ALG9	HIP_M06	0.429849	TCx_M04	0.537057	PCx_M04	0.450743	FWM_M00	0.235395
ALKBH1	HIP_M00	0.392327	TCx_M00	0.297637	PCx_M00	0.331992	FWM_M00	0.364029
ALKBH2	HIP_M18	0.615862	TCx_M04	0.433883	PCx_M04	0.619886	FWM_M10	0.578729
ALKBH3	HIP_M06	0.604549	TCx_M15	0.478701	PCx_M16	0.503417	FWM_M00	0.28952
ALKBH4	HIP_M14	0.601162	TCx_M13	0.618855	PCx_M14	0.553032	FWM_M08	0.490343
ALKBH5	HIP_M14	0.573878	TCx_M13	0.489815	PCx_M14	0.52214	FWM_M06	0.594458
ALKBH6	HIP_M06	0.573159	TCx_M02	0.537968	PCx_M14	0.528009	FWM_M09	0.493019
ALKBH7	HIP_M14	0.796825	TCx_M13	0.758115	PCx_M14	0.789473	FWM_M10	0.814655
ALKBH8	HIP_M06	0.480367	TCx_M04	0.472183	PCx_M16	0.432403	FWM_M01	0.401233
ALMS1	HIP_M00	0.311827	TCx_M00	0.325199	PCx_M16	0.426947	FWM_M15	0.565795
ALMS1-IT1	HIP_M19	0.485886	TCx_M00	0.34019	PCx_M16	0.512789	FWM_M15	0.752803
ALMS1P	HIP_M00	0.323093	TCx_M00	0.350617	PCx_M00	0.269794	FWM_M01	0.594441
ALOX12-AS1	HIP_M00	0.13324	TCx_M00	0.300971	PCx_M00	0.279125	FWM_M16	0.702464
ALOX12P1	HIP_M09	0.407884	TCx_M07	0.432938	PCx_M08	0.589426	FWM_M00	0.237229
ALOX12P2	HIP_M01	0.617307	TCx_M00	0.291591	PCx_M00	0.286188	FWM_M01	0.667671
ALOX5	HIP_M20	0.870059	TCx_M18	0.768752	PCx_M20	0.816753	FWM_M14	0.858903
ALOX5AP	HIP_M20	0.803999	TCx_M18	0.728842	PCx_M20	0.787679	FWM_M17	0.886806
ALPK1	HIP_M04	0.468291	TCx_M20	0.61011	PCx_M20	0.556071	FWM_M14	0.745152
ALPL	HIP_M14	0.410415	TCx_M17	0.500252	PCx_M17	0.414417	FWM_M07	0.415553
ALS2	HIP_M02	0.647816	TCx_M01	0.610364	PCx_M03	0.555989	FWM_M01	0.820483
ALS2CL	HIP_M16	0.500687	TCx_M13	0.483835	PCx_M14	0.51409	FWM_M01	0.856554
ALS2CR11	HIP_M00	0.37319	TCx_M00	0.332437	PCx_M16	0.619097	FWM_M15	0.805911
ALS2CR12	HIP_M09	0.453822	TCx_M00	0.273668	PCx_M00	0.298164	FWM_M01	0.618714
ALYREF	HIP_M18	0.524034	TCx_M13	0.446723	PCx_M04	0.720892	FWM_M10	0.57028
AMACR	HIP_M06	0.428139	TCx_M04	0.566809	PCx_M00	0.386516	FWM_M01	0.433762
AMBRA1	HIP_M14	0.44138	TCx_M00	0.282683	PCx_M00	0.333096	FWM_M12	0.490369
AMD1	HIP_M10	0.582601	TCx_M08	0.565247	PCx_M09	0.455475	FWM_M15	0.772211
AMDHD2	HIP_M14	0.81137	TCx_M13	0.831501	PCx_M14	0.788782	FWM_M08	0.770376
AMER1	HIP_M00	0.28943	TCx_M00	0.263715	PCx_M00	0.341739	FWM_M01	0.494423
AMER2	HIP_M19	0.734995	TCx_M19	0.752554	PCx_M19	0.760477	FWM_M16	0.956298
AMER3	HIP_M02	0.601098	TCx_M02	0.807371	PCx_M14	0.669998	FWM_M01	0.968461
AMFR	HIP_M18	0.43095	TCx_M04	0.534363	PCx_M00	0.328797	FWM_M10	0.562601
AMIGO1	HIP_M02	0.749892	TCx_M03	0.678231	PCx_M03	0.666059	FWM_M01	0.94769
AMIGO2	HIP_M16	0.549955	TCx_M00	0.390497	PCx_M15	0.601338	FWM_M00	0.192488
AMIGO3	HIP_M14	0.727171	TCx_M13	0.773663	PCx_M14	0.671058	FWM_M09	0.568351
AMMECR1	HIP_M10	0.462856	TCx_M08	0.423029	PCx_M09	0.436453	FWM_M01	0.563917
AMMECR1L	HIP_M00	0.136721	TCx_M10	0.489383	PCx_M00	0.253212	FWM_M00	0.305025
AMMECR1LP1	HIP_M04	0.537344	TCx_M01	0.4264	PCx_M03	0.420404	FWM_M01	0.88782
AMN1	HIP_M10	0.78513	TCx_M08	0.770716	PCx_M09	0.672621	FWM_M01	0.416076
AMOT	HIP_M15	0.721556	TCx_M17	0.73561	PCx_M17	0.480555	FWM_M00	0.128051
AMOTL1	HIP_M00	0.340094	TCx_M14	0.593552	PCx_M00	0.376471	FWM_M01	0.501481
AMOTL2	HIP_M19	0.746757	TCx_M19	0.692485	PCx_M19	0.705787	FWM_M15	0.885434
AMPD2	HIP_M02	0.518453	TCx_M13	0.637786	PCx_M14	0.576406	FWM_M01	0.839938
AMPD3	HIP_M19	0.573421	TCx_M19	0.578408	PCx_M19	0.708531	FWM_M15	0.812841
AMPH	HIP_M02	0.722044	TCx_M01	0.856103	PCx_M03	0.800477	FWM_M01	0.944754
AMT	HIP_M15	0.618942	TCx_M00	0.36584	PCx_M16	0.516044	FWM_M09	0.467517
AMY2B	HIP_M06	0.588733	TCx_M15	0.599519	PCx_M16	0.689178	FWM_M00	0.291409
AMZ1	HIP_M14	0.512703	TCx_M13	0.497441	PCx_M14	0.473007	FWM_M08	0.424071
AMZ2	HIP_M15	0.430006	TCx_M15	0.457468	PCx_M16	0.497348	FWM_M00	0.308848
AMZ2P1	HIP_M10	0.440804	TCx_M04	0.55234	PCx_M16	0.519157	FWM_M00	0.264119
ANAPC1	HIP_M06	0.582952	TCx_M04	0.717512	PCx_M00	0.385916	FWM_M00	0.189528
ANAPC10	HIP_M06	0.444456	TCx_M00	0.332517	PCx_M00	0.396185	FWM_M00	0.113026
ANAPC11	HIP_M14	0.714429	TCx_M13	0.722416	PCx_M14	0.657736	FWM_M08	0.810359
ANAPC13	HIP_M06	0.55625	TCx_M04	0.743842	PCx_M04	0.444099	FWM_M01	0.405915
ANAPC15	HIP_M06	0.466952	TCx_M04	0.450036	PCx_M04	0.438419	FWM_M00	0.368472
ANAPC16	HIP_M12	0.569301	TCx_M10	0.689402	PCx_M11	0.607666	FWM_M06	0.73948
ANAPC2	HIP_M14	0.86428	TCx_M13	0.864478	PCx_M14	0.8367	FWM_M10	0.810283
ANAPC4	HIP_M00	0.38381	TCx_M15	0.490612	PCx_M16	0.489822	FWM_M15	0.495256
ANAPC5	HIP_M06	0.597287	TCx_M00	0.378718	PCx_M19	0.439904	FWM_M15	0.740437
ANAPC7	HIP_M02	0.624068	TCx_M04	0.647418	PCx_M00	0.278517	FWM_M00	0.37722
ANGEL1	HIP_M00	0.354736	TCx_M00	0.359828	PCx_M00	0.391264	FWM_M15	0.532713
ANGEL2	HIP_M10	0.754802	TCx_M08	0.749145	PCx_M09	0.679636	FWM_M00	0.293201
ANGPT1	HIP_M17	0.519826	TCx_M12	0.434643	PCx_M13	0.671473	FWM_M16	0.583847
ANGPT2	HIP_M00	0.34046	TCx_M00	0.371961	PCx_M17	0.500858	FWM_M00	0.398475
ANGPTL1	HIP_M00	0.327557	TCx_M00	0.297276	PCx_M00	0.395134	FWM_M00	0.285324
ANGPTL2	HIP_M19	0.556894	TCx_M19	0.642605	PCx_M19	0.721772	FWM_M15	0.851922
ANGPTL4	HIP_M18	0.745183	TCx_M18	0.747637	PCx_M18	0.751746	FWM_M13	0.763516
ANK1	HIP_M03	0.468551	TCx_M02	0.56385	PCx_M03	0.52732	FWM_M01	0.921175
ANK2	HIP_M02	0.705892	TCx_M01	0.690545	PCx_M03	0.746928	FWM_M01	0.817837
ANK3	HIP_M02	0.768213	TCx_M01	0.627138	PCx_M08	0.429187	FWM_M15	0.635781
ANKAR	HIP_M15	0.467252	TCx_M00	0.291765	PCx_M19	0.487699	FWM_M15	0.739463
ANKDD1A	HIP_M00	0.266802	TCx_M00	0.312545	PCx_M00	0.305597	FWM_M01	0.714767
ANKFN1	HIP_M17	0.641688	TCx_M17	0.59158	PCx_M16	0.470777	FWM_M16	0.499845
ANKFY1	HIP_M15	0.649896	TCx_M17	0.594608	PCx_M19	0.619095	FWM_M16	0.861842
ANKH	HIP_M12	0.524821	TCx_M03	0.541821	PCx_M11	0.703448	FWM_M01	0.52353
ANKHD1	HIP_M15	0.413442	TCx_M15	0.526329	PCx_M16	0.735843	FWM_M15	0.79302
ANKHD1-EIF4EBP3	HIP_M00	0.391378	TCx_M00	0.329803	PCx_M00	0.281159	FWM_M00	0.390582
ANKIB1	HIP_M19	0.554868	TCx_M19	0.670776	PCx_M19	0.781883	FWM_M16	0.931556
ANKLE1	HIP_M00	0.211682	TCx_M00	0.268947	PCx_M01	0.446793	FWM_M00	0.373184
ANKLE2	HIP_M00	0.394796	TCx_M00	0.269144	PCx_M15	0.46877	FWM_M00	0.376917
ANKMY1	HIP_M15	0.590587	TCx_M15	0.654352	PCx_M16	0.671632	FWM_M15	0.767082
ANKMY2	HIP_M06	0.788233	TCx_M04	0.7742	PCx_M04	0.556646	FWM_M01	0.857138
ANKRA2	HIP_M06	0.592521	TCx_M15	0.667895	PCx_M16	0.670133	FWM_M15	0.781286
ANKRD10	HIP_M00	0.370719	TCx_M00	0.392951	PCx_M00	0.357567	FWM_M16	0.687395
ANKRD11	HIP_M12	0.595368	TCx_M16	0.487636	PCx_M11	0.673948	FWM_M09	0.580438
ANKRD12	HIP_M09	0.601364	TCx_M07	0.803028	PCx_M07	0.842756	FWM_M04	0.714856
ANKRD13A	HIP_M19	0.725668	TCx_M19	0.606961	PCx_M19	0.810505	FWM_M15	0.937066
ANKRD13B	HIP_M14	0.49311	TCx_M13	0.670248	PCx_M14	0.649026	FWM_M12	0.512728
ANKRD13C	HIP_M06	0.480101	TCx_M04	0.515327	PCx_M16	0.476775	FWM_M00	0.313016
ANKRD13D	HIP_M14	0.737259	TCx_M13	0.821544	PCx_M14	0.812929	FWM_M09	0.774416
ANKRD16	HIP_M00	0.372123	TCx_M02	0.54248	PCx_M14	0.441874	FWM_M09	0.557287
ANKRD17	HIP_M05	0.609633	TCx_M07	0.562567	PCx_M07	0.72494	FWM_M04	0.661903
ANKRD18A	HIP_M19	0.626121	TCx_M19	0.588809	PCx_M19	0.600228	FWM_M16	0.769504
ANKRD18B	HIP_M00	0.307901	TCx_M00	0.227976	PCx_M00	0.233376	FWM_M01	0.811142
ANKRD19P	HIP_M01	0.561218	TCx_M00	0.343941	PCx_M02	0.450124	FWM_M01	0.889435
ANKRD20A1	HIP_M00	0.394397	TCx_M00	0.274676	PCx_M00	0.340917	FWM_M01	0.787096
ANKRD20A16P	HIP_M07	0.663634	TCx_M05	0.690597	PCx_M05	0.688296	FWM_M00	0.131476
ANKRD20A17P	HIP_M07	0.545728	TCx_M05	0.564619	PCx_M05	0.569737	FWM_M00	0.100395
ANKRD20A18P	HIP_M10	0.536949	TCx_M10	0.594604	PCx_M11	0.545316	FWM_M01	0.451239
ANKRD20A19P	HIP_M01	0.690041	TCx_M00	0.135116	PCx_M00	0.192908	FWM_M00	0.315315
ANKRD20A2	HIP_M00	0.397314	TCx_M00	0.202162	PCx_M00	0.332316	FWM_M01	0.85851
ANKRD20A20P	HIP_M10	0.520932	TCx_M08	0.45103	PCx_M03	0.459379	FWM_M01	0.763685
ANKRD20A3	HIP_M00	0.272629	TCx_M00	0.304408	PCx_M00	0.300388	FWM_M01	0.711613
ANKRD20A4	HIP_M00	0.266331	TCx_M00	0.247535	PCx_M00	0.18148	FWM_M00	0.278834
ANKRD20A5P	HIP_M00	0.314224	TCx_M00	0.295958	PCx_M00	0.298016	FWM_M01	0.822871
ANKRD20A6P	HIP_M07	0.788074	TCx_M05	0.754166	PCx_M05	0.814854	FWM_M00	0.243597
ANKRD20A7P	HIP_M00	0.380768	TCx_M00	0.106378	PCx_M00	0.172772	FWM_M01	0.583788
ANKRD20A8P	HIP_M00	0.238979	TCx_M00	0.186402	PCx_M00	0.319486	FWM_M01	0.538777
ANKRD20A9P	HIP_M10	0.440421	TCx_M08	0.499608	PCx_M03	0.508464	FWM_M01	0.771976
ANKRD23	HIP_M16	0.523841	TCx_M16	0.462994	PCx_M00	0.390222	FWM_M12	0.859471
ANKRD24	HIP_M00	0.371947	TCx_M13	0.588007	PCx_M14	0.562638	FWM_M01	0.902677
ANKRD26	HIP_M00	0.367832	TCx_M07	0.4322	PCx_M08	0.536912	FWM_M01	0.844072
ANKRD26P3	HIP_M01	0.621823	TCx_M00	0.165312	PCx_M00	0.174514	FWM_M01	0.641795
ANKRD27	HIP_M04	0.453837	TCx_M00	0.2141	PCx_M00	0.28448	FWM_M01	0.604117
ANKRD28	HIP_M06	0.522354	TCx_M15	0.702196	PCx_M16	0.785892	FWM_M15	0.877265
ANKRD29	HIP_M02	0.619411	TCx_M03	0.627344	PCx_M03	0.415968	FWM_M01	0.88792
ANKRD30B	HIP_M00	0.281788	TCx_M15	0.423629	PCx_M16	0.416254	FWM_M01	0.881874
ANKRD30BL	HIP_M00	0.377601	TCx_M00	0.235951	PCx_M00	0.300201	FWM_M01	0.910562
ANKRD30BP1	HIP_M09	0.449879	TCx_M07	0.458362	PCx_M08	0.686048	FWM_M01	0.711346
ANKRD30BP2	HIP_M00	0.359146	TCx_M15	0.445553	PCx_M00	0.366938	FWM_M01	0.674872
ANKRD32	HIP_M10	0.642258	TCx_M01	0.628839	PCx_M03	0.585801	FWM_M01	0.927221
ANKRD33B	HIP_M04	0.668406	TCx_M14	0.752733	PCx_M15	0.711659	FWM_M01	0.941239
ANKRD34A	HIP_M04	0.48466	TCx_M00	0.345228	PCx_M03	0.499585	FWM_M01	0.920648
ANKRD34C	HIP_M05	0.575719	TCx_M03	0.675708	PCx_M03	0.644562	FWM_M01	0.901144
ANKRD34C-AS1	HIP_M00	0.38998	TCx_M02	0.439904	PCx_M00	0.36658	FWM_M01	0.800841
ANKRD35	HIP_M15	0.536582	TCx_M00	0.281347	PCx_M00	0.279747	FWM_M01	0.681756
ANKRD36	HIP_M00	0.287157	TCx_M00	0.341988	PCx_M00	0.389212	FWM_M00	0.127838
ANKRD36B	HIP_M19	0.405489	TCx_M00	0.333397	PCx_M00	0.29607	FWM_M00	0.310773
ANKRD36BP1	HIP_M10	0.729769	TCx_M17	0.644651	PCx_M09	0.581901	FWM_M15	0.791179
ANKRD36BP2	HIP_M01	0.552043	TCx_M00	0.313634	PCx_M00	0.184015	FWM_M01	0.615817
ANKRD36C	HIP_M19	0.448433	TCx_M20	0.416802	PCx_M16	0.546615	FWM_M15	0.536989
ANKRD36P1	HIP_M10	0.453931	TCx_M00	0.390902	PCx_M09	0.475873	FWM_M00	0.292321
ANKRD37	HIP_M12	0.70646	TCx_M10	0.586051	PCx_M11	0.709719	FWM_M06	0.771546
ANKRD39	HIP_M14	0.49888	TCx_M13	0.577674	PCx_M14	0.68538	FWM_M10	0.615384
ANKRD40	HIP_M19	0.644384	TCx_M17	0.660167	PCx_M17	0.72575	FWM_M16	0.914885
ANKRD42	HIP_M02	0.822934	TCx_M03	0.646619	PCx_M03	0.608245	FWM_M01	0.896518
ANKRD44	HIP_M19	0.610259	TCx_M19	0.494851	PCx_M19	0.694081	FWM_M16	0.917237
ANKRD45	HIP_M00	0.3431	TCx_M00	0.206185	PCx_M00	0.241981	FWM_M00	0.287371
ANKRD46	HIP_M10	0.941886	TCx_M08	0.927927	PCx_M09	0.835818	FWM_M01	0.650847
ANKRD49	HIP_M10	0.476921	TCx_M08	0.409425	PCx_M09	0.547532	FWM_M00	0.228584
ANKRD50	HIP_M10	0.697422	TCx_M08	0.470248	PCx_M09	0.527219	FWM_M01	0.561821
ANKRD52	HIP_M05	0.501474	TCx_M10	0.443711	PCx_M11	0.527313	FWM_M01	0.781864
ANKRD54	HIP_M14	0.444526	TCx_M02	0.492526	PCx_M14	0.47381	FWM_M09	0.736965
ANKRD57P1	HIP_M07	0.798616	TCx_M05	0.796552	PCx_M05	0.800095	FWM_M00	0.302785
ANKRD6	HIP_M05	0.432164	TCx_M00	0.174876	PCx_M00	0.24962	FWM_M01	0.50013
ANKRD60	HIP_M00	0.303301	TCx_M00	0.259512	PCx_M01	0.637263	FWM_M00	0.223374
ANKRD62	HIP_M01	0.433206	TCx_M15	0.413764	PCx_M16	0.424406	FWM_M01	0.576718
ANKRD65	HIP_M15	0.477561	TCx_M00	0.330917	PCx_M04	0.417476	FWM_M15	0.744815
ANKRD9	HIP_M12	0.614919	TCx_M16	0.655136	PCx_M11	0.583139	FWM_M09	0.481244
ANKS1A	HIP_M00	0.376945	TCx_M00	0.334244	PCx_M00	0.277813	FWM_M01	0.68197
ANKS1B	HIP_M04	0.862416	TCx_M01	0.782456	PCx_M03	0.596217	FWM_M00	0.243837
ANKS3	HIP_M14	0.702528	TCx_M13	0.707477	PCx_M14	0.764515	FWM_M08	0.76976
ANKS4B	HIP_M00	0.290204	TCx_M00	0.24883	PCx_M01	0.54276	FWM_M00	0.067143
ANKS6	HIP_M01	0.441831	TCx_M00	0.388329	PCx_M00	0.350538	FWM_M00	0.253216
ANKZF1	HIP_M16	0.529035	TCx_M19	0.467203	PCx_M00	0.37328	FWM_M16	0.682693
ANLN	HIP_M19	0.681038	TCx_M19	0.809609	PCx_M19	0.804189	FWM_M16	0.94176
ANO10	HIP_M06	0.436401	TCx_M15	0.530386	PCx_M16	0.550481	FWM_M00	0.158749
ANO2	HIP_M16	0.441645	TCx_M16	0.599054	PCx_M17	0.542484	FWM_M14	0.449704
ANO3	HIP_M02	0.729699	TCx_M01	0.817443	PCx_M03	0.660522	FWM_M01	0.921923
ANO4	HIP_M03	0.461602	TCx_M19	0.482645	PCx_M19	0.641267	FWM_M15	0.719038
ANO5	HIP_M04	0.687772	TCx_M03	0.81753	PCx_M03	0.646535	FWM_M01	0.917534
ANO6	HIP_M18	0.69516	TCx_M18	0.664285	PCx_M18	0.624343	FWM_M13	0.67673
ANO8	HIP_M14	0.624783	TCx_M13	0.762875	PCx_M14	0.652512	FWM_M08	0.614884
ANP32A	HIP_M00	0.35776	TCx_M07	0.453002	PCx_M07	0.601602	FWM_M16	0.764815
ANP32A-IT1	HIP_M16	0.482517	TCx_M10	0.563398	PCx_M11	0.452692	FWM_M16	0.770896
ANP32B	HIP_M09	0.783749	TCx_M07	0.755013	PCx_M07	0.780825	FWM_M16	0.795859
ANP32C	HIP_M00	0.381735	TCx_M00	0.334953	PCx_M00	0.304799	FWM_M16	0.680674
ANP32E	HIP_M10	0.707188	TCx_M08	0.513977	PCx_M09	0.667559	FWM_M00	0.326027
ANTXR1	HIP_M17	0.689941	TCx_M17	0.617582	PCx_M16	0.518499	FWM_M15	0.699296
ANTXR2	HIP_M16	0.745839	TCx_M00	0.286548	PCx_M00	0.393495	FWM_M07	0.427283
ANXA1	HIP_M18	0.710788	TCx_M18	0.63778	PCx_M18	0.577886	FWM_M13	0.579447
ANXA11	HIP_M05	0.455163	TCx_M00	0.399811	PCx_M11	0.507183	FWM_M01	0.903931
ANXA2	HIP_M18	0.830948	TCx_M18	0.798678	PCx_M18	0.641802	FWM_M13	0.737639
ANXA2P1	HIP_M19	0.590396	TCx_M19	0.635002	PCx_M19	0.680405	FWM_M15	0.840215
ANXA3	HIP_M00	0.363513	TCx_M00	0.318867	PCx_M00	0.367212	FWM_M00	0.330694
ANXA4	HIP_M15	0.661928	TCx_M15	0.602304	PCx_M16	0.751618	FWM_M15	0.912874
ANXA5	HIP_M18	0.648978	TCx_M18	0.641822	PCx_M17	0.543575	FWM_M15	0.828693
ANXA6	HIP_M02	0.661764	TCx_M04	0.808916	PCx_M03	0.630406	FWM_M01	0.910665
ANXA7	HIP_M06	0.893174	TCx_M15	0.783628	PCx_M16	0.81089	FWM_M00	0.192472
ANXA9	HIP_M19	0.708962	TCx_M19	0.772786	PCx_M19	0.731255	FWM_M16	0.929939
AOAH	HIP_M20	0.553744	TCx_M20	0.682661	PCx_M20	0.696763	FWM_M17	0.89604
AOC2	HIP_M12	0.648627	TCx_M10	0.725003	PCx_M11	0.727018	FWM_M06	0.409414
AP1AR	HIP_M10	0.799329	TCx_M08	0.769994	PCx_M09	0.764438	FWM_M01	0.464971
AP1B1	HIP_M14	0.65075	TCx_M13	0.730104	PCx_M14	0.657303	FWM_M09	0.641552
AP1G1	HIP_M05	0.623658	TCx_M01	0.450238	PCx_M07	0.454645	FWM_M16	0.446786
AP1G2	HIP_M09	0.546071	TCx_M00	0.376849	PCx_M08	0.46526	FWM_M01	0.838435
AP1M1	HIP_M14	0.679439	TCx_M13	0.723452	PCx_M14	0.760866	FWM_M09	0.875928
AP1S1	HIP_M05	0.634093	TCx_M04	0.614377	PCx_M03	0.500678	FWM_M01	0.900843
AP1S2	HIP_M10	0.659482	TCx_M08	0.827907	PCx_M09	0.818259	FWM_M16	0.60672
AP1S3	HIP_M00	0.340087	TCx_M00	0.242489	PCx_M01	0.770701	FWM_M00	0.237912
AP2A1	HIP_M14	0.802276	TCx_M13	0.86563	PCx_M14	0.875294	FWM_M09	0.934845
AP2A2	HIP_M14	0.510613	TCx_M02	0.711819	PCx_M14	0.641221	FWM_M01	0.907369
AP2B1	HIP_M02	0.722294	TCx_M03	0.523113	PCx_M03	0.49612	FWM_M01	0.757494
AP2M1	HIP_M02	0.705727	TCx_M04	0.864821	PCx_M03	0.602292	FWM_M01	0.796455
AP2S1	HIP_M02	0.588536	TCx_M04	0.609962	PCx_M06	0.512058	FWM_M01	0.735972
AP3B1	HIP_M19	0.579285	TCx_M19	0.622109	PCx_M19	0.724201	FWM_M16	0.898177
AP3B2	HIP_M02	0.764571	TCx_M01	0.779383	PCx_M03	0.672102	FWM_M01	0.967484
AP3D1	HIP_M14	0.772316	TCx_M13	0.839733	PCx_M14	0.834105	FWM_M09	0.913845
AP3M1	HIP_M09	0.430334	TCx_M10	0.534129	PCx_M07	0.53219	FWM_M16	0.570351
AP3M2	HIP_M02	0.733325	TCx_M04	0.794028	PCx_M03	0.588636	FWM_M01	0.830112
AP3S1	HIP_M10	0.841512	TCx_M08	0.817883	PCx_M09	0.737667	FWM_M01	0.635677
AP3S2	HIP_M06	0.48251	TCx_M00	0.382252	PCx_M16	0.449773	FWM_M00	0.152773
AP4B1	HIP_M01	0.420298	TCx_M04	0.437191	PCx_M00	0.20827	FWM_M00	0.329989
AP4B1-AS1	HIP_M00	0.275226	TCx_M00	0.274779	PCx_M00	0.396671	FWM_M00	0.315324
AP4E1	HIP_M10	0.420341	TCx_M10	0.470368	PCx_M09	0.452738	FWM_M16	0.748659
AP4M1	HIP_M14	0.518256	TCx_M02	0.516263	PCx_M14	0.675008	FWM_M08	0.483892
AP4S1	HIP_M02	0.508036	TCx_M01	0.475592	PCx_M01	0.582543	FWM_M01	0.636399
AP5B1	HIP_M14	0.524257	TCx_M13	0.469666	PCx_M14	0.589984	FWM_M09	0.728833
AP5M1	HIP_M10	0.880712	TCx_M08	0.804941	PCx_M09	0.660378	FWM_M01	0.427664
AP5S1	HIP_M15	0.536285	TCx_M13	0.67402	PCx_M14	0.542732	FWM_M08	0.579391
AP5Z1	HIP_M14	0.867784	TCx_M13	0.868063	PCx_M14	0.879401	FWM_M08	0.822974
APAF1	HIP_M10	0.695233	TCx_M08	0.647304	PCx_M09	0.566353	FWM_M00	0.317281
APBA1	HIP_M02	0.669102	TCx_M02	0.534202	PCx_M03	0.7139	FWM_M01	0.965306
APBA2	HIP_M02	0.528027	TCx_M02	0.742414	PCx_M14	0.732085	FWM_M09	0.805736
APBA3	HIP_M14	0.758031	TCx_M13	0.673033	PCx_M14	0.723206	FWM_M10	0.802949
APBB1	HIP_M14	0.496658	TCx_M04	0.681296	PCx_M14	0.449312	FWM_M08	0.540945
APBB1IP	HIP_M20	0.726216	TCx_M20	0.829283	PCx_M20	0.722358	FWM_M17	0.860883
APBB2	HIP_M19	0.628373	TCx_M19	0.705349	PCx_M19	0.793531	FWM_M15	0.90541
APBB3	HIP_M06	0.467706	TCx_M02	0.675968	PCx_M14	0.425295	FWM_M09	0.595728
APC	HIP_M02	0.467268	TCx_M00	0.323237	PCx_M00	0.364059	FWM_M01	0.753826
APC2	HIP_M14	0.913418	TCx_M13	0.95363	PCx_M14	0.914349	FWM_M08	0.872961
APCDD1	HIP_M15	0.527705	TCx_M17	0.774858	PCx_M17	0.807672	FWM_M15	0.40369
APEH	HIP_M06	0.590102	TCx_M15	0.540272	PCx_M16	0.544063	FWM_M09	0.666931
APEX1	HIP_M06	0.635863	TCx_M15	0.640747	PCx_M16	0.736136	FWM_M00	0.218657
APEX2	HIP_M00	0.355656	TCx_M00	0.314853	PCx_M04	0.444382	FWM_M17	0.469536
APH1A	HIP_M15	0.797188	TCx_M15	0.751349	PCx_M16	0.789082	FWM_M15	0.765012
APH1B	HIP_M15	0.729188	TCx_M15	0.702798	PCx_M16	0.864289	FWM_M15	0.681377
API5	HIP_M10	0.596111	TCx_M08	0.54237	PCx_M07	0.520416	FWM_M00	0.27292
APIP	HIP_M00	0.295465	TCx_M00	0.332361	PCx_M19	0.458461	FWM_M15	0.841815
APITD1	HIP_M00	0.333999	TCx_M00	0.225601	PCx_M00	0.221789	FWM_M01	0.728774
APLF	HIP_M04	0.617907	TCx_M00	0.321699	PCx_M19	0.416929	FWM_M16	0.719679
APLN	HIP_M15	0.528433	TCx_M00	0.301579	PCx_M00	0.156646	FWM_M15	0.621241
APLNR	HIP_M15	0.762837	TCx_M18	0.680452	PCx_M18	0.530052	FWM_M15	0.805916
APLP1	HIP_M14	0.674162	TCx_M13	0.604587	PCx_M14	0.482827	FWM_M16	0.782654
APLP2	HIP_M02	0.611698	TCx_M04	0.739498	PCx_M03	0.529774	FWM_M01	0.866424
APMAP	HIP_M02	0.641056	TCx_M04	0.828869	PCx_M04	0.481797	FWM_M01	0.461174
APOA1-AS	HIP_M00	0.281634	TCx_M00	0.319847	PCx_M00	0.334419	FWM_M16	0.735102
APOA1BP	HIP_M15	0.428538	TCx_M00	0.340271	PCx_M00	0.351491	FWM_M10	0.570572
APOBEC3A	HIP_M08	0.63709	TCx_M06	0.588465	PCx_M06	0.492242	FWM_M03	0.425793
APOBEC3D	HIP_M08	0.475459	TCx_M00	0.339379	PCx_M01	0.546304	FWM_M12	0.43013
APOBEC4	HIP_M04	0.426744	TCx_M00	0.296625	PCx_M00	0.388785	FWM_M01	0.800517
APOC1	HIP_M20	0.671567	TCx_M18	0.615725	PCx_M20	0.690939	FWM_M17	0.836408
APOC2	HIP_M20	0.777937	TCx_M20	0.639806	PCx_M20	0.735379	FWM_M17	0.830221
APOD	HIP_M09	0.559041	TCx_M07	0.667361	PCx_M07	0.644523	FWM_M16	0.833572
APOE	HIP_M14	0.759289	TCx_M13	0.85002	PCx_M14	0.773872	FWM_M10	0.775459
APOL1	HIP_M18	0.465202	TCx_M00	0.227435	PCx_M00	0.283377	FWM_M13	0.42437
APOL2	HIP_M00	0.290419	TCx_M01	0.571752	PCx_M03	0.582915	FWM_M01	0.792734
APOL3	HIP_M20	0.50191	TCx_M17	0.471661	PCx_M17	0.694358	FWM_M07	0.455559
APOL4	HIP_M18	0.637244	TCx_M00	0.375746	PCx_M00	0.39568	FWM_M11	0.577012
APOL6	HIP_M18	0.644425	TCx_M18	0.694142	PCx_M18	0.672611	FWM_M13	0.785774
APOLD1	HIP_M00	0.382465	TCx_M18	0.479346	PCx_M18	0.52773	FWM_M13	0.55349
APOO	HIP_M02	0.79498	TCx_M04	0.484953	PCx_M00	0.380626	FWM_M01	0.82414
APOOL	HIP_M02	0.570948	TCx_M00	0.221925	PCx_M00	0.183674	FWM_M00	0.353735
APOPT1	HIP_M00	0.301798	TCx_M00	0.299658	PCx_M00	0.275825	FWM_M08	0.440358
APP	HIP_M02	0.665129	TCx_M01	0.727743	PCx_M03	0.560089	FWM_M00	0.212457
APPBP2	HIP_M10	0.832276	TCx_M08	0.78692	PCx_M09	0.787554	FWM_M15	0.466619
APPL1	HIP_M10	0.90602	TCx_M08	0.907798	PCx_M09	0.809278	FWM_M00	0.344126
APPL2	HIP_M17	0.599665	TCx_M17	0.774015	PCx_M00	0.395174	FWM_M16	0.714299
APRT	HIP_M14	0.577288	TCx_M13	0.555142	PCx_M04	0.662134	FWM_M10	0.648416
APTR	HIP_M00	0.33343	TCx_M00	0.25033	PCx_M00	0.253216	FWM_M06	0.439166
APTX	HIP_M05	0.461348	TCx_M04	0.498968	PCx_M04	0.442762	FWM_M02	0.506201
AQP1	HIP_M18	0.536778	TCx_M19	0.674281	PCx_M19	0.787096	FWM_M15	0.843906
AQP11	HIP_M00	0.381817	TCx_M00	0.313314	PCx_M09	0.403369	FWM_M00	0.252279
AQP3	HIP_M05	0.599615	TCx_M00	0.310972	PCx_M18	0.4318	FWM_M09	0.460783
AQP4	HIP_M15	0.664603	TCx_M18	0.480524	PCx_M16	0.530214	FWM_M15	0.445431
AQP4-AS1	HIP_M00	0.361724	TCx_M00	0.265122	PCx_M00	0.384954	FWM_M00	0.252717
AQP6	HIP_M00	0.26005	TCx_M00	0.307271	PCx_M01	0.670148	FWM_M15	0.481492
AQP9	HIP_M00	0.365113	TCx_M00	0.38754	PCx_M00	0.348776	FWM_M07	0.401697
AQR	HIP_M00	0.335814	TCx_M04	0.422769	PCx_M12	0.401966	FWM_M00	0.29337
ARAF	HIP_M16	0.533513	TCx_M00	0.365714	PCx_M19	0.434844	FWM_M12	0.799041
ARAP1	HIP_M16	0.767945	TCx_M16	0.665232	PCx_M11	0.481733	FWM_M12	0.827935
ARAP2	HIP_M19	0.785589	TCx_M19	0.761	PCx_M19	0.790764	FWM_M15	0.928017
ARAP3	HIP_M16	0.465473	TCx_M15	0.562789	PCx_M16	0.576829	FWM_M00	0.302426
ARC	HIP_M00	0.380799	TCx_M14	0.85597	PCx_M15	0.908289	FWM_M09	0.459348
ARCN1	HIP_M06	0.575644	TCx_M04	0.68246	PCx_M04	0.502311	FWM_M02	0.572477
AREL1	HIP_M02	0.708498	TCx_M04	0.467583	PCx_M00	0.22473	FWM_M01	0.452425
ARF1	HIP_M14	0.53167	TCx_M02	0.770845	PCx_M14	0.6428	FWM_M09	0.827509
ARF1P2	HIP_M00	0.157196	TCx_M00	0.332688	PCx_M00	0.188223	FWM_M16	0.470072
ARF3	HIP_M02	0.89516	TCx_M04	0.755432	PCx_M03	0.615005	FWM_M01	0.947891
ARF4	HIP_M10	0.721903	TCx_M08	0.741781	PCx_M09	0.681207	FWM_M00	0.253883
ARF4P2	HIP_M00	0.306394	TCx_M00	0.251284	PCx_M00	0.187258	FWM_M00	0.247395
ARF5	HIP_M06	0.791688	TCx_M04	0.751692	PCx_M04	0.514478	FWM_M01	0.801802
ARF6	HIP_M10	0.621059	TCx_M08	0.648157	PCx_M09	0.641215	FWM_M00	0.37264
ARFGAP1	HIP_M14	0.843293	TCx_M13	0.891728	PCx_M14	0.853812	FWM_M08	0.810098
ARFGAP2	HIP_M06	0.823751	TCx_M15	0.777301	PCx_M16	0.786452	FWM_M00	0.380695
ARFGAP3	HIP_M18	0.603271	TCx_M18	0.458652	PCx_M18	0.640835	FWM_M13	0.641286
ARFGEF1	HIP_M05	0.595372	TCx_M08	0.475539	PCx_M07	0.46542	FWM_M00	0.368381
ARFGEF2	HIP_M02	0.633365	TCx_M04	0.659843	PCx_M03	0.469711	FWM_M01	0.800543
ARFGEF3	HIP_M01	0.691363	TCx_M00	0.377897	PCx_M00	0.383783	FWM_M16	0.749382
ARFIP1	HIP_M10	0.594457	TCx_M08	0.503459	PCx_M09	0.687469	FWM_M15	0.786648
ARFIP2	HIP_M00	0.395664	TCx_M04	0.652458	PCx_M04	0.421282	FWM_M09	0.609361
ARFRP1	HIP_M14	0.813872	TCx_M13	0.877179	PCx_M14	0.836898	FWM_M08	0.865679
ARG2	HIP_M05	0.782189	TCx_M03	0.475452	PCx_M11	0.579962	FWM_M01	0.458188
ARGFX	HIP_M00	0.208507	TCx_M00	0.24402	PCx_M01	0.845243	FWM_M00	0.234522
ARGFXP2	HIP_M12	0.40901	TCx_M00	0.372549	PCx_M11	0.417736	FWM_M00	0.298199
ARGLU1	HIP_M10	0.533602	TCx_M08	0.573135	PCx_M09	0.597531	FWM_M16	0.787143
ARHGAP1	HIP_M15	0.763529	TCx_M19	0.576175	PCx_M19	0.709105	FWM_M15	0.871462
ARHGAP10	HIP_M00	0.249325	TCx_M00	0.299119	PCx_M00	0.331847	FWM_M07	0.526425
ARHGAP11A	HIP_M00	0.2672	TCx_M00	0.193428	PCx_M00	0.305888	FWM_M16	0.621584
ARHGAP12	HIP_M10	0.559688	TCx_M08	0.475688	PCx_M09	0.544996	FWM_M00	0.243289
ARHGAP15	HIP_M20	0.534235	TCx_M20	0.621717	PCx_M20	0.520382	FWM_M17	0.883923
ARHGAP17	HIP_M16	0.518978	TCx_M19	0.631519	PCx_M19	0.600339	FWM_M16	0.869914
ARHGAP18	HIP_M10	0.42174	TCx_M18	0.53894	PCx_M20	0.440066	FWM_M14	0.540665
ARHGAP19	HIP_M15	0.536251	TCx_M15	0.510444	PCx_M16	0.663233	FWM_M15	0.895264
ARHGAP20	HIP_M02	0.729814	TCx_M01	0.816881	PCx_M03	0.765989	FWM_M01	0.919568
ARHGAP21	HIP_M19	0.438469	TCx_M19	0.682853	PCx_M19	0.738728	FWM_M16	0.916032
ARHGAP22	HIP_M14	0.569205	TCx_M13	0.606855	PCx_M19	0.566589	FWM_M12	0.883021
ARHGAP23	HIP_M19	0.658759	TCx_M19	0.696307	PCx_M19	0.675102	FWM_M12	0.907531
ARHGAP23P1	HIP_M19	0.560815	TCx_M19	0.576442	PCx_M19	0.547784	FWM_M16	0.895443
ARHGAP24	HIP_M04	0.689177	TCx_M03	0.423195	PCx_M00	0.318174	FWM_M01	0.817453
ARHGAP25	HIP_M20	0.668299	TCx_M20	0.55509	PCx_M20	0.500449	FWM_M17	0.693674
ARHGAP26	HIP_M05	0.461772	TCx_M03	0.549597	PCx_M03	0.440527	FWM_M01	0.810865
ARHGAP26-IT1	HIP_M00	0.376058	TCx_M00	0.276092	PCx_M00	0.364459	FWM_M00	0.359865
ARHGAP27	HIP_M20	0.644576	TCx_M13	0.497833	PCx_M14	0.408233	FWM_M17	0.518296
ARHGAP29	HIP_M00	0.316117	TCx_M17	0.486269	PCx_M17	0.65804	FWM_M01	0.437063
ARHGAP30	HIP_M20	0.895163	TCx_M20	0.681006	PCx_M20	0.715904	FWM_M17	0.868062
ARHGAP31	HIP_M17	0.554369	TCx_M17	0.876332	PCx_M17	0.875051	FWM_M00	0.340308
ARHGAP32	HIP_M02	0.605969	TCx_M01	0.611079	PCx_M03	0.66399	FWM_M01	0.946922
ARHGAP33	HIP_M14	0.668993	TCx_M13	0.7067	PCx_M14	0.685724	FWM_M08	0.616375
ARHGAP35	HIP_M05	0.61786	TCx_M10	0.448079	PCx_M11	0.497686	FWM_M01	0.651234
ARHGAP36	HIP_M05	0.402308	TCx_M00	0.385894	PCx_M16	0.444848	FWM_M00	0.348566
ARHGAP39	HIP_M14	0.872917	TCx_M13	0.917054	PCx_M14	0.928089	FWM_M09	0.8158
ARHGAP4	HIP_M14	0.660126	TCx_M13	0.601108	PCx_M20	0.498157	FWM_M14	0.756082
ARHGAP42	HIP_M17	0.446367	TCx_M17	0.771318	PCx_M17	0.833827	FWM_M00	0.294212
ARHGAP42P3	HIP_M09	0.787958	TCx_M07	0.716219	PCx_M08	0.949091	FWM_M04	0.644979
ARHGAP44	HIP_M02	0.663248	TCx_M01	0.773635	PCx_M03	0.737147	FWM_M01	0.968584
ARHGAP5	HIP_M10	0.46961	TCx_M17	0.640919	PCx_M17	0.549943	FWM_M16	0.669388
ARHGAP5-AS1	HIP_M00	0.216488	TCx_M17	0.490072	PCx_M00	0.359668	FWM_M00	0.151818
ARHGAP6	HIP_M00	0.3681	TCx_M20	0.492056	PCx_M00	0.339354	FWM_M17	0.669081
ARHGAP9	HIP_M16	0.558541	TCx_M00	0.36731	PCx_M20	0.491833	FWM_M17	0.547554
ARHGDIA	HIP_M14	0.805661	TCx_M13	0.81606	PCx_M14	0.743061	FWM_M08	0.766695
ARHGDIB	HIP_M20	0.78256	TCx_M20	0.781684	PCx_M20	0.768878	FWM_M17	0.89977
ARHGDIG	HIP_M14	0.68112	TCx_M13	0.814329	PCx_M14	0.822149	FWM_M01	0.880986
ARHGEF1	HIP_M14	0.715269	TCx_M13	0.756685	PCx_M14	0.593424	FWM_M10	0.860981
ARHGEF10	HIP_M16	0.748266	TCx_M19	0.793727	PCx_M17	0.662733	FWM_M12	0.87191
ARHGEF10L	HIP_M14	0.762796	TCx_M13	0.853727	PCx_M14	0.856841	FWM_M09	0.810056
ARHGEF11	HIP_M02	0.52462	TCx_M02	0.559983	PCx_M03	0.534086	FWM_M01	0.924723
ARHGEF12	HIP_M05	0.641036	TCx_M08	0.634286	PCx_M03	0.483771	FWM_M01	0.897826
ARHGEF17	HIP_M01	0.598514	TCx_M13	0.736828	PCx_M14	0.763451	FWM_M01	0.83526
ARHGEF18	HIP_M14	0.821906	TCx_M13	0.776811	PCx_M14	0.810754	FWM_M10	0.8655
ARHGEF2	HIP_M19	0.635799	TCx_M19	0.461535	PCx_M19	0.54323	FWM_M15	0.901651
ARHGEF25	HIP_M02	0.620022	TCx_M01	0.743943	PCx_M03	0.803616	FWM_M01	0.955158
ARHGEF26	HIP_M16	0.467421	TCx_M17	0.70179	PCx_M00	0.353198	FWM_M00	0.130211
ARHGEF26-AS1	HIP_M09	0.523091	TCx_M07	0.429456	PCx_M08	0.738203	FWM_M01	0.50815
ARHGEF28	HIP_M01	0.522813	TCx_M00	0.258612	PCx_M03	0.449457	FWM_M01	0.892213
ARHGEF3	HIP_M02	0.742746	TCx_M01	0.845553	PCx_M03	0.732302	FWM_M01	0.859281
ARHGEF33	HIP_M00	0.314696	TCx_M00	0.339884	PCx_M11	0.496643	FWM_M01	0.864428
ARHGEF37	HIP_M19	0.864269	TCx_M19	0.797911	PCx_M19	0.868264	FWM_M15	0.930934
ARHGEF39	HIP_M00	0.285423	TCx_M00	0.145332	PCx_M00	0.261041	FWM_M00	0.287212
ARHGEF4	HIP_M14	0.73731	TCx_M13	0.87952	PCx_M14	0.877363	FWM_M09	0.828571
ARHGEF40	HIP_M16	0.673943	TCx_M16	0.766972	PCx_M14	0.448839	FWM_M12	0.818381
ARHGEF6	HIP_M17	0.428402	TCx_M17	0.685264	PCx_M07	0.491978	FWM_M17	0.656145
ARHGEF7	HIP_M04	0.579523	TCx_M01	0.624108	PCx_M03	0.623397	FWM_M06	0.583217
ARHGEF9	HIP_M02	0.862646	TCx_M01	0.91325	PCx_M03	0.82139	FWM_M01	0.9477
ARID1A	HIP_M09	0.710728	TCx_M07	0.555168	PCx_M07	0.579181	FWM_M16	0.659402
ARID1B	HIP_M05	0.570805	TCx_M10	0.529991	PCx_M11	0.556317	FWM_M04	0.470887
ARID2	HIP_M00	0.397016	TCx_M07	0.5744	PCx_M07	0.568926	FWM_M16	0.920322
ARID4A	HIP_M10	0.582306	TCx_M07	0.500902	PCx_M07	0.485522	FWM_M00	0.376954
ARID4B	HIP_M09	0.504918	TCx_M07	0.670137	PCx_M07	0.671357	FWM_M16	0.785008
ARID5A	HIP_M18	0.745227	TCx_M18	0.643544	PCx_M18	0.736193	FWM_M13	0.771611
ARID5B	HIP_M12	0.575649	TCx_M10	0.445258	PCx_M15	0.590293	FWM_M06	0.645631
ARIH1	HIP_M05	0.644487	TCx_M03	0.698381	PCx_M09	0.429769	FWM_M01	0.510416
ARIH2	HIP_M06	0.442041	TCx_M15	0.461012	PCx_M19	0.555549	FWM_M15	0.881318
ARIH2OS	HIP_M14	0.504821	TCx_M13	0.411841	PCx_M14	0.509173	FWM_M10	0.667041
ARL1	HIP_M10	0.824597	TCx_M08	0.757658	PCx_M09	0.678319	FWM_M01	0.580783
ARL10	HIP_M05	0.478781	TCx_M00	0.286161	PCx_M00	0.33246	FWM_M00	0.333563
ARL13B	HIP_M10	0.507287	TCx_M15	0.531553	PCx_M16	0.630412	FWM_M15	0.642444
ARL14EP	HIP_M10	0.791319	TCx_M08	0.803093	PCx_M09	0.613785	FWM_M01	0.796147
ARL15	HIP_M04	0.691415	TCx_M08	0.583393	PCx_M09	0.457521	FWM_M01	0.6661
ARL16	HIP_M00	0.386726	TCx_M15	0.412878	PCx_M04	0.523594	FWM_M08	0.510784
ARL17A	HIP_M00	0.316344	TCx_M00	0.284816	PCx_M00	0.326329	FWM_M00	0.2286
ARL17B	HIP_M00	0.221861	TCx_M00	0.153178	PCx_M00	0.233668	FWM_M00	0.11057
ARL2	HIP_M14	0.624488	TCx_M13	0.592166	PCx_M14	0.656878	FWM_M10	0.74858
ARL2-SNX15	HIP_M00	0.258303	TCx_M00	0.275309	PCx_M00	0.213015	FWM_M00	0.206112
ARL2BP	HIP_M05	0.535577	TCx_M03	0.596419	PCx_M09	0.50316	FWM_M01	0.564054
ARL2BPP10	HIP_M00	0.310989	TCx_M00	0.304695	PCx_M00	0.329798	FWM_M00	0.275068
ARL2BPP9	HIP_M00	0.190759	TCx_M00	0.226168	PCx_M01	0.450648	FWM_M00	0.266384
ARL3	HIP_M02	0.519606	TCx_M04	0.554252	PCx_M03	0.559178	FWM_M01	0.924756
ARL4A	HIP_M03	0.411275	TCx_M08	0.594849	PCx_M03	0.56532	FWM_M01	0.857352
ARL4C	HIP_M03	0.543833	TCx_M03	0.835701	PCx_M03	0.731286	FWM_M01	0.850099
ARL4D	HIP_M06	0.403196	TCx_M14	0.697286	PCx_M15	0.687091	FWM_M01	0.833164
ARL5A	HIP_M10	0.856002	TCx_M08	0.845818	PCx_M09	0.904766	FWM_M00	0.396727
ARL5AP1	HIP_M09	0.661401	TCx_M07	0.643739	PCx_M08	0.627121	FWM_M04	0.518048
ARL5B	HIP_M10	0.765201	TCx_M08	0.861556	PCx_M09	0.634515	FWM_M00	0.359543
ARL6	HIP_M10	0.770889	TCx_M08	0.742463	PCx_M03	0.509498	FWM_M01	0.813211
ARL6IP1	HIP_M10	0.808337	TCx_M08	0.826549	PCx_M09	0.675522	FWM_M01	0.865399
ARL6IP4	HIP_M14	0.650447	TCx_M13	0.719688	PCx_M14	0.623787	FWM_M08	0.720196
ARL6IP5	HIP_M10	0.741123	TCx_M08	0.813821	PCx_M09	0.670502	FWM_M00	0.296592
ARL6IP6	HIP_M16	0.405928	TCx_M16	0.450842	PCx_M17	0.455165	FWM_M16	0.67913
ARL8A	HIP_M00	0.377026	TCx_M00	0.387763	PCx_M19	0.503428	FWM_M15	0.83817
ARL8B	HIP_M10	0.863324	TCx_M08	0.891356	PCx_M09	0.743095	FWM_M01	0.670942
ARMC1	HIP_M10	0.889765	TCx_M08	0.803118	PCx_M09	0.812536	FWM_M15	0.491204
ARMC10	HIP_M10	0.727748	TCx_M08	0.619321	PCx_M09	0.555938	FWM_M15	0.561641
ARMC10P1	HIP_M00	0.275279	TCx_M00	0.246579	PCx_M00	0.280618	FWM_M00	0.201558
ARMC2	HIP_M00	0.321478	TCx_M00	0.388322	PCx_M00	0.304595	FWM_M01	0.73231
ARMC3	HIP_M17	0.921273	TCx_M00	0.371678	PCx_M00	0.386266	FWM_M16	0.54772
ARMC5	HIP_M14	0.841355	TCx_M13	0.862306	PCx_M14	0.824238	FWM_M08	0.790835
ARMC6	HIP_M14	0.756631	TCx_M13	0.83281	PCx_M14	0.79391	FWM_M08	0.800418
ARMC7	HIP_M00	0.290067	TCx_M13	0.40485	PCx_M00	0.364099	FWM_M09	0.488874
ARMC8	HIP_M10	0.725816	TCx_M08	0.64129	PCx_M09	0.646765	FWM_M00	0.222492
ARMC9	HIP_M04	0.493161	TCx_M00	0.390666	PCx_M11	0.436769	FWM_M01	0.961349
ARMCX1	HIP_M10	0.599832	TCx_M04	0.662545	PCx_M09	0.505591	FWM_M01	0.716182
ARMCX2	HIP_M05	0.774016	TCx_M01	0.462067	PCx_M03	0.523029	FWM_M01	0.8327
ARMCX3	HIP_M10	0.741833	TCx_M04	0.759985	PCx_M09	0.591019	FWM_M00	0.296761
ARMCX4	HIP_M06	0.427456	TCx_M01	0.649683	PCx_M00	0.373105	FWM_M01	0.539333
ARMCX5	HIP_M06	0.861191	TCx_M04	0.723901	PCx_M16	0.635926	FWM_M01	0.523342
ARMCX5-GPRASP2	HIP_M05	0.606327	TCx_M00	0.389059	PCx_M11	0.459702	FWM_M01	0.647914
ARMCX6	HIP_M06	0.473107	TCx_M18	0.446693	PCx_M04	0.512599	FWM_M02	0.653182
ARMT1	HIP_M10	0.840837	TCx_M08	0.793434	PCx_M09	0.621242	FWM_M01	0.672396
ARNT	HIP_M00	0.329236	TCx_M07	0.555226	PCx_M07	0.616058	FWM_M16	0.455337
ARNT2	HIP_M04	0.440676	TCx_M04	0.458586	PCx_M03	0.550284	FWM_M01	0.916084
ARNTL	HIP_M12	0.541267	TCx_M10	0.547663	PCx_M11	0.689395	FWM_M01	0.871556
ARNTL2	HIP_M04	0.698658	TCx_M01	0.644655	PCx_M03	0.630392	FWM_M01	0.957629
ARPC1A	HIP_M04	0.733295	TCx_M04	0.763896	PCx_M03	0.412157	FWM_M01	0.718883
ARPC1B	HIP_M20	0.658044	TCx_M18	0.666617	PCx_M20	0.582946	FWM_M14	0.789365
ARPC2	HIP_M04	0.65467	TCx_M04	0.716243	PCx_M04	0.564607	FWM_M01	0.601508
ARPC3	HIP_M06	0.647299	TCx_M04	0.597458	PCx_M04	0.636857	FWM_M14	0.409256
ARPC3P1	HIP_M00	0.289455	TCx_M00	0.373519	PCx_M00	0.225166	FWM_M00	0.269549
ARPC4	HIP_M06	0.644852	TCx_M04	0.741626	PCx_M04	0.705073	FWM_M00	0.30458
ARPC4-TTLL3	HIP_M16	0.467372	TCx_M00	0.35498	PCx_M00	0.300585	FWM_M15	0.475703
ARPC5	HIP_M10	0.532036	TCx_M18	0.413379	PCx_M09	0.589488	FWM_M15	0.85783
ARPC5L	HIP_M05	0.602706	TCx_M04	0.805059	PCx_M03	0.524649	FWM_M01	0.821486
ARPIN	HIP_M15	0.742336	TCx_M17	0.556676	PCx_M16	0.754667	FWM_M15	0.697675
ARPP19	HIP_M10	0.782078	TCx_M08	0.789393	PCx_M09	0.750508	FWM_M02	0.45303
ARPP21	HIP_M05	0.636522	TCx_M01	0.824381	PCx_M15	0.662491	FWM_M01	0.951595
ARRB1	HIP_M00	0.386534	TCx_M16	0.454034	PCx_M03	0.427521	FWM_M01	0.848396
ARRB2	HIP_M09	0.476608	TCx_M00	0.331257	PCx_M07	0.497386	FWM_M17	0.453468
ARRDC1	HIP_M14	0.858132	TCx_M13	0.826054	PCx_M14	0.828052	FWM_M09	0.746656
ARRDC1-AS1	HIP_M14	0.613424	TCx_M13	0.659243	PCx_M14	0.604872	FWM_M08	0.581265
ARRDC2	HIP_M16	0.538533	TCx_M19	0.64623	PCx_M19	0.625863	FWM_M12	0.874138
ARRDC3	HIP_M18	0.563121	TCx_M00	0.362921	PCx_M18	0.48138	FWM_M16	0.742915
ARRDC3-AS1	HIP_M00	0.286129	TCx_M07	0.477382	PCx_M07	0.407992	FWM_M11	0.489277
ARRDC4	HIP_M15	0.629957	TCx_M19	0.598338	PCx_M16	0.696376	FWM_M15	0.840118
ARSA	HIP_M14	0.819383	TCx_M13	0.809598	PCx_M14	0.757277	FWM_M10	0.784492
ARSB	HIP_M00	0.168501	TCx_M00	0.20819	PCx_M00	0.268049	FWM_M16	0.471611
ARSD	HIP_M15	0.840855	TCx_M15	0.703908	PCx_M16	0.809221	FWM_M15	0.493775
ARSDP1	HIP_M11	0.94326	TCx_M09	0.939354	PCx_M10	0.958568	FWM_M05	0.737458
ARSF	HIP_M00	0.323181	TCx_M00	0.291967	PCx_M00	0.211922	FWM_M00	0.254191
ARSG	HIP_M06	0.554008	TCx_M15	0.737675	PCx_M16	0.669454	FWM_M01	0.568736
ARSJ	HIP_M12	0.51043	TCx_M10	0.607116	PCx_M11	0.589674	FWM_M01	0.725844
ARSK	HIP_M05	0.598189	TCx_M10	0.472223	PCx_M11	0.513418	FWM_M01	0.701629
ART3	HIP_M19	0.660088	TCx_M00	0.294305	PCx_M00	0.280598	FWM_M00	0.0730843
ARV1	HIP_M02	0.592827	TCx_M04	0.493979	PCx_M00	0.315873	FWM_M00	0.228372
ARVCF	HIP_M14	0.704606	TCx_M13	0.80279	PCx_M14	0.729241	FWM_M08	0.741514
AS3MT	HIP_M00	0.25594	TCx_M00	0.245005	PCx_M00	0.242537	FWM_M00	0.217116
ASAH1	HIP_M10	0.525266	TCx_M15	0.523839	PCx_M16	0.609975	FWM_M15	0.722994
ASAH2B	HIP_M10	0.626784	TCx_M01	0.693058	PCx_M03	0.418528	FWM_M01	0.827636
ASAP1	HIP_M09	0.513686	TCx_M07	0.612687	PCx_M08	0.645729	FWM_M01	0.733975
ASAP1-IT1	HIP_M00	0.395862	TCx_M00	0.399199	PCx_M15	0.503798	FWM_M00	0.245252
ASAP1-IT2	HIP_M00	0.385394	TCx_M00	0.206281	PCx_M00	0.310528	FWM_M00	0.354212
ASAP2	HIP_M03	0.495916	TCx_M00	0.353862	PCx_M00	0.366054	FWM_M01	0.486683
ASAP3	HIP_M18	0.676796	TCx_M18	0.524964	PCx_M18	0.610723	FWM_M13	0.612685
ASB1	HIP_M02	0.439569	TCx_M00	0.292198	PCx_M00	0.354034	FWM_M00	0.366839
ASB11	HIP_M08	0.498223	TCx_M06	0.477956	PCx_M01	0.474056	FWM_M12	0.430916
ASB13	HIP_M15	0.479425	TCx_M04	0.514885	PCx_M00	0.323219	FWM_M01	0.593714
ASB14	HIP_M00	0.258054	TCx_M00	0.268334	PCx_M09	0.431687	FWM_M00	0.374127
ASB16-AS1	HIP_M00	0.171947	TCx_M00	0.200593	PCx_M00	0.266755	FWM_M00	0.371655
ASB2	HIP_M00	0.320849	TCx_M02	0.481557	PCx_M03	0.408639	FWM_M01	0.855179
ASB3	HIP_M10	0.55488	TCx_M08	0.569724	PCx_M09	0.576321	FWM_M00	0.32445
ASB4	HIP_M15	0.480689	TCx_M17	0.587772	PCx_M19	0.420397	FWM_M15	0.628281
ASB6	HIP_M14	0.710157	TCx_M13	0.735897	PCx_M14	0.694972	FWM_M09	0.598355
ASB7	HIP_M10	0.42309	TCx_M00	0.366701	PCx_M00	0.248256	FWM_M00	0.0668712
ASB8	HIP_M03	0.440698	TCx_M00	0.370349	PCx_M00	0.362887	FWM_M01	0.509958
ASCC1	HIP_M17	0.439954	TCx_M19	0.502811	PCx_M19	0.522762	FWM_M16	0.911369
ASCC2	HIP_M14	0.50586	TCx_M13	0.517911	PCx_M19	0.462799	FWM_M15	0.761512
ASCC3	HIP_M10	0.556812	TCx_M00	0.33142	PCx_M09	0.50307	FWM_M16	0.529385
ASCL1	HIP_M17	0.444574	TCx_M00	0.246193	PCx_M00	0.264939	FWM_M00	0.291733
ASF1A	HIP_M10	0.605636	TCx_M08	0.515446	PCx_M09	0.602447	FWM_M15	0.484346
ASH1L	HIP_M05	0.523387	TCx_M07	0.473971	PCx_M07	0.595319	FWM_M04	0.544848
ASH1L-AS1	HIP_M14	0.445299	TCx_M00	0.346582	PCx_M14	0.456804	FWM_M12	0.610527
ASH2L	HIP_M06	0.775396	TCx_M04	0.604431	PCx_M16	0.516183	FWM_M01	0.477653
ASIC1	HIP_M09	0.413575	TCx_M13	0.42839	PCx_M00	0.367456	FWM_M01	0.514256
ASIC2	HIP_M03	0.730078	TCx_M01	0.735661	PCx_M03	0.655511	FWM_M01	0.939562
ASIC3	HIP_M00	0.342562	TCx_M00	0.313458	PCx_M00	0.260299	FWM_M12	0.564873
ASIC4	HIP_M14	0.52442	TCx_M00	0.397816	PCx_M14	0.487498	FWM_M00	0.348239
ASL	HIP_M15	0.742725	TCx_M15	0.633363	PCx_M16	0.635708	FWM_M08	0.474324
ASLP1	HIP_M00	0.327482	TCx_M00	0.215466	PCx_M00	0.32494	FWM_M00	0.345257
ASMTL	HIP_M15	0.60224	TCx_M02	0.513662	PCx_M10	0.51817	FWM_M08	0.505575
ASMTL-AS1	HIP_M00	0.357979	TCx_M00	0.384245	PCx_M00	0.387362	FWM_M00	0.207386
ASNA1	HIP_M06	0.434023	TCx_M04	0.676418	PCx_M04	0.463376	FWM_M09	0.613957
ASNS	HIP_M02	0.723256	TCx_M01	0.722344	PCx_M03	0.533445	FWM_M01	0.846644
ASNSD1	HIP_M05	0.629627	TCx_M08	0.533318	PCx_M00	0.306157	FWM_M00	0.31461
ASPA	HIP_M19	0.819262	TCx_M19	0.865311	PCx_M19	0.923602	FWM_M16	0.890764
ASPDH	HIP_M14	0.606473	TCx_M13	0.704446	PCx_M14	0.811362	FWM_M09	0.773716
ASPH	HIP_M15	0.468233	TCx_M15	0.590202	PCx_M16	0.581618	FWM_M01	0.568478
ASPHD1	HIP_M14	0.777645	TCx_M13	0.861393	PCx_M14	0.806471	FWM_M10	0.723647
ASPHD2	HIP_M05	0.773863	TCx_M03	0.608013	PCx_M11	0.655114	FWM_M01	0.901586
ASPRV1	HIP_M16	0.424691	TCx_M00	0.399992	PCx_M11	0.462242	FWM_M16	0.670557
ASPSCR1	HIP_M14	0.832043	TCx_M13	0.821579	PCx_M14	0.748447	FWM_M10	0.835532
ASRGL1	HIP_M15	0.438737	TCx_M00	0.37622	PCx_M00	0.315064	FWM_M09	0.461764
ASS1	HIP_M15	0.553769	TCx_M04	0.526603	PCx_M04	0.51519	FWM_M09	0.412341
ASS1P10	HIP_M01	0.657215	TCx_M00	0.230098	PCx_M00	0.255068	FWM_M01	0.640066
ASTE1	HIP_M00	0.150561	TCx_M00	0.309205	PCx_M00	0.141609	FWM_M15	0.452767
ASTN1	HIP_M02	0.693186	TCx_M02	0.658701	PCx_M03	0.530524	FWM_M01	0.938237
ASTN2	HIP_M09	0.62123	TCx_M07	0.578343	PCx_M08	0.835609	FWM_M04	0.48649
ASUN	HIP_M00	0.348591	TCx_M07	0.476705	PCx_M07	0.609968	FWM_M16	0.827025
ASXL1	HIP_M16	0.688056	TCx_M00	0.368053	PCx_M00	0.297442	FWM_M16	0.736342
ASXL2	HIP_M09	0.651801	TCx_M07	0.664983	PCx_M08	0.548803	FWM_M16	0.532589
ASXL3	HIP_M03	0.648343	TCx_M00	0.284172	PCx_M08	0.434724	FWM_M01	0.779597
ATAD1	HIP_M06	0.741064	TCx_M04	0.763918	PCx_M16	0.557844	FWM_M01	0.660433
ATAD2	HIP_M00	0.195023	TCx_M00	0.281237	PCx_M00	0.308221	FWM_M01	0.771529
ATAD2B	HIP_M00	0.364932	TCx_M15	0.40647	PCx_M16	0.53585	FWM_M15	0.875402
ATAD3A	HIP_M14	0.842044	TCx_M13	0.85086	PCx_M14	0.785956	FWM_M08	0.887494
ATAD3B	HIP_M14	0.8325	TCx_M13	0.823577	PCx_M14	0.793612	FWM_M08	0.847644
ATAD3C	HIP_M00	0.360296	TCx_M00	0.355967	PCx_M00	0.389796	FWM_M16	0.618186
ATAD5	HIP_M00	0.227185	TCx_M00	0.216238	PCx_M00	0.344581	FWM_M00	0.187486
ATAT1	HIP_M09	0.45395	TCx_M07	0.453452	PCx_M07	0.435094	FWM_M12	0.501518
ATCAY	HIP_M02	0.751259	TCx_M01	0.78863	PCx_M03	0.795636	FWM_M01	0.971834
ATE1	HIP_M10	0.745645	TCx_M08	0.737504	PCx_M09	0.612588	FWM_M02	0.422102
ATE1-AS1	HIP_M00	0.384917	TCx_M00	0.345837	PCx_M00	0.258869	FWM_M16	0.402768
ATF1	HIP_M10	0.601499	TCx_M08	0.586108	PCx_M09	0.526473	FWM_M06	0.476966
ATF1P1	HIP_M00	0.261795	TCx_M13	0.431419	PCx_M00	0.313807	FWM_M00	0.303686
ATF2	HIP_M05	0.778851	TCx_M08	0.809911	PCx_M03	0.620988	FWM_M01	0.755123
ATF3	HIP_M18	0.599807	TCx_M14	0.537119	PCx_M15	0.695774	FWM_M11	0.814194
ATF4	HIP_M12	0.700051	TCx_M10	0.571555	PCx_M11	0.560983	FWM_M06	0.726303
ATF5	HIP_M00	0.295813	TCx_M00	0.358496	PCx_M00	0.377137	FWM_M14	0.480657
ATF6	HIP_M20	0.483363	TCx_M00	0.344882	PCx_M20	0.413326	FWM_M17	0.628454
ATF6B	HIP_M00	0.364106	TCx_M00	0.382235	PCx_M00	0.377459	FWM_M00	0.357434
ATF7	HIP_M16	0.533113	TCx_M07	0.583905	PCx_M19	0.62712	FWM_M16	0.868845
ATF7IP	HIP_M09	0.516086	TCx_M07	0.584157	PCx_M07	0.595039	FWM_M16	0.74013
ATF7IP2	HIP_M02	0.504782	TCx_M00	0.29881	PCx_M00	0.315399	FWM_M01	0.728564
ATG10	HIP_M00	0.359201	TCx_M00	0.193942	PCx_M00	0.307563	FWM_M00	0.191218
ATG101	HIP_M05	0.507133	TCx_M00	0.303522	PCx_M00	0.380238	FWM_M00	0.364595
ATG12	HIP_M10	0.830649	TCx_M08	0.782833	PCx_M09	0.73427	FWM_M16	0.431468
ATG12P1	HIP_M00	0.290862	TCx_M00	0.285383	PCx_M00	0.16026	FWM_M16	0.491353
ATG12P2	HIP_M00	0.280286	TCx_M00	0.310944	PCx_M00	0.380435	FWM_M11	0.611617
ATG13	HIP_M19	0.482565	TCx_M00	0.394336	PCx_M19	0.405975	FWM_M15	0.69262
ATG14	HIP_M06	0.47373	TCx_M15	0.612361	PCx_M16	0.62717	FWM_M15	0.57783
ATG16L1	HIP_M05	0.60162	TCx_M01	0.759875	PCx_M03	0.59037	FWM_M01	0.740493
ATG16L2	HIP_M16	0.68398	TCx_M13	0.577899	PCx_M14	0.549707	FWM_M12	0.433176
ATG2A	HIP_M14	0.812496	TCx_M13	0.793698	PCx_M14	0.715483	FWM_M08	0.734292
ATG2B	HIP_M10	0.435624	TCx_M01	0.616272	PCx_M09	0.400996	FWM_M00	0.272214
ATG3	HIP_M06	0.546663	TCx_M08	0.406109	PCx_M19	0.625372	FWM_M15	0.884818
ATG4A	HIP_M00	0.392153	TCx_M00	0.373147	PCx_M00	0.263997	FWM_M16	0.489021
ATG4B	HIP_M14	0.734	TCx_M13	0.747015	PCx_M14	0.757708	FWM_M08	0.630915
ATG4C	HIP_M19	0.648355	TCx_M19	0.704949	PCx_M19	0.747384	FWM_M16	0.935698
ATG4D	HIP_M14	0.776887	TCx_M13	0.761513	PCx_M14	0.776311	FWM_M08	0.709477
ATG5	HIP_M10	0.625283	TCx_M08	0.688117	PCx_M03	0.481758	FWM_M01	0.568162
ATG7	HIP_M03	0.413428	TCx_M04	0.557952	PCx_M00	0.335512	FWM_M00	0.200112
ATG9A	HIP_M14	0.649713	TCx_M13	0.557387	PCx_M14	0.56007	FWM_M09	0.780007
ATHL1	HIP_M16	0.569631	TCx_M18	0.437561	PCx_M20	0.453013	FWM_M02	0.72224
ATIC	HIP_M00	0.292456	TCx_M00	0.184919	PCx_M00	0.283928	FWM_M00	0.183585
ATL1	HIP_M02	0.797397	TCx_M01	0.699936	PCx_M03	0.58791	FWM_M01	0.770621
ATL2	HIP_M10	0.740454	TCx_M03	0.744738	PCx_M03	0.657896	FWM_M01	0.911123
ATL3	HIP_M10	0.427714	TCx_M17	0.544783	PCx_M09	0.643644	FWM_M16	0.838413
ATM	HIP_M00	0.334103	TCx_M19	0.595117	PCx_M19	0.585088	FWM_M16	0.946583
ATMIN	HIP_M10	0.630975	TCx_M04	0.669354	PCx_M09	0.50016	FWM_M01	0.412848
ATN1	HIP_M09	0.64829	TCx_M16	0.521708	PCx_M00	0.368135	FWM_M09	0.517712
ATOH8	HIP_M16	0.670918	TCx_M17	0.695163	PCx_M18	0.401128	FWM_M12	0.693065
ATOX1	HIP_M06	0.531314	TCx_M15	0.5463	PCx_M04	0.739787	FWM_M15	0.761734
ATP10A	HIP_M17	0.479371	TCx_M17	0.529495	PCx_M17	0.562319	FWM_M00	0.305009
ATP10B	HIP_M19	0.854994	TCx_M19	0.757368	PCx_M19	0.833583	FWM_M15	0.952932
ATP10D	HIP_M17	0.469614	TCx_M17	0.63024	PCx_M00	0.384265	FWM_M17	0.556538
ATP11A	HIP_M16	0.67123	TCx_M19	0.765597	PCx_M19	0.709344	FWM_M16	0.925333
ATP11A-AS1	HIP_M00	0.292385	TCx_M00	0.389963	PCx_M00	0.39819	FWM_M16	0.831739
ATP11B	HIP_M10	0.418405	TCx_M08	0.489573	PCx_M11	0.418844	FWM_M16	0.822907
ATP11C	HIP_M16	0.507493	TCx_M18	0.51392	PCx_M20	0.525373	FWM_M16	0.846972
ATP13A1	HIP_M14	0.794019	TCx_M13	0.808205	PCx_M14	0.776287	FWM_M08	0.596156
ATP13A2	HIP_M14	0.829318	TCx_M13	0.864332	PCx_M14	0.849302	FWM_M09	0.922703
ATP13A3	HIP_M06	0.544174	TCx_M04	0.573056	PCx_M00	0.393172	FWM_M13	0.530007
ATP13A4	HIP_M15	0.7094	TCx_M15	0.574525	PCx_M16	0.606643	FWM_M00	0.199285
ATP1A1	HIP_M02	0.805843	TCx_M01	0.829324	PCx_M03	0.725997	FWM_M01	0.879915
ATP1A1-AS1	HIP_M17	0.414261	TCx_M00	0.286471	PCx_M19	0.400604	FWM_M16	0.661653
ATP1A2	HIP_M15	0.511479	TCx_M00	0.26121	PCx_M00	0.213139	FWM_M00	0.349015
ATP1A3	HIP_M02	0.777764	TCx_M02	0.831385	PCx_M03	0.675185	FWM_M01	0.935378
ATP1B1	HIP_M02	0.911148	TCx_M01	0.742646	PCx_M03	0.622857	FWM_M01	0.587115
ATP1B1P1	HIP_M00	0.200529	TCx_M00	0.260913	PCx_M00	0.346249	FWM_M16	0.42428
ATP1B2	HIP_M09	0.508429	TCx_M07	0.471976	PCx_M07	0.420289	FWM_M00	0.309717
ATP1B3	HIP_M05	0.617112	TCx_M03	0.478074	PCx_M03	0.436722	FWM_M11	0.549993
ATP2A2	HIP_M02	0.758234	TCx_M03	0.865733	PCx_M03	0.74346	FWM_M01	0.869344
ATP2B1	HIP_M02	0.889734	TCx_M01	0.928127	PCx_M03	0.869723	FWM_M01	0.920121
ATP2B2	HIP_M02	0.691445	TCx_M02	0.725543	PCx_M03	0.75076	FWM_M01	0.955794
ATP2B3	HIP_M02	0.745729	TCx_M01	0.761565	PCx_M03	0.691677	FWM_M01	0.962564
ATP2B4	HIP_M03	0.503404	TCx_M00	0.293822	PCx_M03	0.466393	FWM_M01	0.853578
ATP2C1	HIP_M05	0.673824	TCx_M08	0.643257	PCx_M11	0.533593	FWM_M06	0.57865
ATP5A1	HIP_M06	0.820673	TCx_M04	0.917465	PCx_M04	0.541819	FWM_M01	0.860455
ATP5B	HIP_M02	0.746876	TCx_M04	0.825297	PCx_M03	0.455517	FWM_M01	0.80865
ATP5C1	HIP_M06	0.763639	TCx_M04	0.811768	PCx_M04	0.622332	FWM_M00	0.333339
ATP5D	HIP_M14	0.915704	TCx_M13	0.914663	PCx_M14	0.89012	FWM_M09	0.835792
ATP5E	HIP_M10	0.565056	TCx_M04	0.632616	PCx_M04	0.624444	FWM_M02	0.645804
ATP5F1	HIP_M06	0.856372	TCx_M04	0.855181	PCx_M04	0.718169	FWM_M00	0.360181
ATP5F1P1	HIP_M00	0.234963	TCx_M00	0.23634	PCx_M00	0.397814	FWM_M16	0.662942
ATP5G1	HIP_M06	0.63916	TCx_M04	0.778691	PCx_M00	0.348635	FWM_M01	0.690704
ATP5G2	HIP_M09	0.406437	TCx_M00	0.390458	PCx_M07	0.558655	FWM_M02	0.695268
ATP5G2P3	HIP_M00	0.305954	TCx_M00	0.270834	PCx_M00	0.163006	FWM_M16	0.648924
ATP5G3	HIP_M02	0.750932	TCx_M04	0.832647	PCx_M04	0.443429	FWM_M01	0.83748
ATP5H	HIP_M06	0.685846	TCx_M04	0.880356	PCx_M04	0.584165	FWM_M01	0.688892
ATP5HP4	HIP_M00	0.353816	TCx_M00	0.35265	PCx_M00	0.277413	FWM_M00	0.393976
ATP5I	HIP_M06	0.534368	TCx_M00	0.317402	PCx_M04	0.648667	FWM_M02	0.796745
ATP5J	HIP_M05	0.526721	TCx_M04	0.472494	PCx_M07	0.640867	FWM_M04	0.512216
ATP5J2	HIP_M06	0.595878	TCx_M04	0.721188	PCx_M04	0.545848	FWM_M01	0.789303
ATP5J2-PTCD1	HIP_M00	0.252656	TCx_M00	0.227672	PCx_M00	0.24926	FWM_M00	0.167683
ATP5L	HIP_M06	0.620422	TCx_M04	0.746048	PCx_M04	0.477275	FWM_M01	0.570936
ATP5O	HIP_M06	0.734038	TCx_M04	0.79581	PCx_M04	0.492008	FWM_M01	0.672999
ATP5S	HIP_M06	0.522171	TCx_M08	0.452784	PCx_M16	0.624183	FWM_M15	0.662786
ATP5SL	HIP_M14	0.511756	TCx_M13	0.543011	PCx_M14	0.573717	FWM_M09	0.660018
ATP6	HIP_M09	0.896306	TCx_M07	0.943804	PCx_M07	0.952131	FWM_M04	0.980296
ATP6AP1	HIP_M02	0.672248	TCx_M04	0.616866	PCx_M03	0.544278	FWM_M01	0.486167
ATP6AP1L	HIP_M00	0.252903	TCx_M00	0.226676	PCx_M00	0.357952	FWM_M00	0.30013
ATP6AP2	HIP_M10	0.803582	TCx_M04	0.82101	PCx_M09	0.615883	FWM_M01	0.700972
ATP6V0A1	HIP_M02	0.850854	TCx_M01	0.760792	PCx_M03	0.706463	FWM_M01	0.861192
ATP6V0A2	HIP_M00	0.238926	TCx_M00	0.346053	PCx_M16	0.450107	FWM_M15	0.621654
ATP6V0B	HIP_M05	0.520064	TCx_M04	0.648289	PCx_M14	0.546771	FWM_M08	0.503013
ATP6V0C	HIP_M14	0.719308	TCx_M02	0.807946	PCx_M14	0.75439	FWM_M09	0.87575
ATP6V0D1	HIP_M02	0.779747	TCx_M02	0.649684	PCx_M03	0.518516	FWM_M01	0.837158
ATP6V0E1	HIP_M18	0.613038	TCx_M18	0.608335	PCx_M20	0.544112	FWM_M16	0.735189
ATP6V0E1P1	HIP_M00	0.148517	TCx_M00	0.147785	PCx_M00	0.171509	FWM_M00	0.202289
ATP6V0E2	HIP_M14	0.500969	TCx_M02	0.732622	PCx_M14	0.64702	FWM_M09	0.743678
ATP6V0E2-AS1	HIP_M00	0.390867	TCx_M00	0.371666	PCx_M00	0.351599	FWM_M00	0.262495
ATP6V1A	HIP_M02	0.88281	TCx_M03	0.845465	PCx_M03	0.789127	FWM_M01	0.885975
ATP6V1B2	HIP_M02	0.851242	TCx_M03	0.849843	PCx_M03	0.766922	FWM_M01	0.864166
ATP6V1C1	HIP_M02	0.826611	TCx_M03	0.788021	PCx_M03	0.801043	FWM_M01	0.894882
ATP6V1D	HIP_M02	0.771992	TCx_M04	0.856429	PCx_M03	0.508381	FWM_M01	0.866953
ATP6V1E1	HIP_M06	0.771578	TCx_M04	0.931375	PCx_M04	0.53352	FWM_M01	0.623452
ATP6V1E2	HIP_M00	0.237756	TCx_M00	0.255763	PCx_M00	0.229944	FWM_M00	0.196159
ATP6V1F	HIP_M02	0.653116	TCx_M04	0.565531	PCx_M04	0.415674	FWM_M01	0.785638
ATP6V1G1	HIP_M10	0.743262	TCx_M08	0.712069	PCx_M09	0.591454	FWM_M01	0.574427
ATP6V1G1P4	HIP_M00	0.255497	TCx_M00	0.24677	PCx_M00	0.225453	FWM_M00	0.386013
ATP6V1G1P7	HIP_M00	0.342619	TCx_M00	0.330307	PCx_M08	0.541824	FWM_M00	0.113729
ATP6V1G2	HIP_M02	0.923299	TCx_M01	0.89852	PCx_M03	0.745588	FWM_M01	0.887634
ATP6V1G2-DDX39B	HIP_M00	0.326565	TCx_M00	0.376041	PCx_M07	0.466753	FWM_M00	0.364609
ATP6V1H	HIP_M02	0.869976	TCx_M04	0.654971	PCx_M03	0.540803	FWM_M01	0.874297
ATP7A	HIP_M19	0.419986	TCx_M15	0.514386	PCx_M19	0.641746	FWM_M15	0.921417
ATP7B	HIP_M04	0.522005	TCx_M14	0.40048	PCx_M00	0.220884	FWM_M01	0.72336
ATP8	HIP_M09	0.839657	TCx_M07	0.923952	PCx_M07	0.944386	FWM_M04	0.921956
ATP8A1	HIP_M02	0.732041	TCx_M01	0.507231	PCx_M19	0.49773	FWM_M16	0.76892
ATP8A2	HIP_M02	0.83272	TCx_M01	0.916959	PCx_M03	0.790229	FWM_M01	0.9539
ATP8A2P2	HIP_M12	0.755989	TCx_M10	0.494717	PCx_M11	0.589615	FWM_M06	0.717956
ATP8B1	HIP_M00	0.323911	TCx_M08	0.414125	PCx_M15	0.494898	FWM_M01	0.768227
ATP8B2	HIP_M00	0.276051	TCx_M00	0.277313	PCx_M14	0.439999	FWM_M01	0.812902
ATP8B4	HIP_M13	0.480151	TCx_M20	0.60802	PCx_M20	0.522604	FWM_M17	0.799259
ATP9A	HIP_M02	0.76003	TCx_M04	0.55103	PCx_M03	0.65064	FWM_M01	0.836882
ATP9B	HIP_M00	0.26277	TCx_M00	0.175026	PCx_M00	0.220656	FWM_M02	0.58633
ATPAF1	HIP_M10	0.417505	TCx_M04	0.521101	PCx_M00	0.252021	FWM_M01	0.405828
ATPAF2	HIP_M16	0.477807	TCx_M00	0.39746	PCx_M14	0.418471	FWM_M00	0.36583
ATPIF1	HIP_M06	0.707339	TCx_M04	0.749367	PCx_M04	0.570206	FWM_M01	0.767899
ATR	HIP_M06	0.721423	TCx_M15	0.683287	PCx_M16	0.731934	FWM_M00	0.331112
ATRAID	HIP_M15	0.559313	TCx_M15	0.543892	PCx_M04	0.619959	FWM_M15	0.847993
ATRIP	HIP_M00	0.280927	TCx_M00	0.202234	PCx_M00	0.301526	FWM_M00	0.362973
ATRN	HIP_M02	0.721447	TCx_M04	0.823405	PCx_M03	0.562501	FWM_M01	0.56333
ATRNL1	HIP_M04	0.775966	TCx_M03	0.748687	PCx_M03	0.629611	FWM_M01	0.774076
ATRX	HIP_M09	0.532935	TCx_M07	0.642197	PCx_M07	0.754913	FWM_M04	0.689896
ATXN1	HIP_M04	0.681411	TCx_M08	0.58682	PCx_M03	0.576347	FWM_M01	0.560755
ATXN10	HIP_M02	0.752436	TCx_M04	0.723369	PCx_M00	0.37441	FWM_M01	0.579241
ATXN1L	HIP_M09	0.515498	TCx_M17	0.626751	PCx_M17	0.641771	FWM_M15	0.735705
ATXN2	HIP_M09	0.810731	TCx_M07	0.862891	PCx_M07	0.861336	FWM_M04	0.804667
ATXN2L	HIP_M09	0.622843	TCx_M13	0.427508	PCx_M11	0.415565	FWM_M09	0.459095
ATXN3	HIP_M10	0.701602	TCx_M08	0.748875	PCx_M09	0.762313	FWM_M00	0.146519
ATXN7	HIP_M09	0.637651	TCx_M07	0.691141	PCx_M08	0.686422	FWM_M04	0.543468
ATXN7L1	HIP_M09	0.678141	TCx_M07	0.590015	PCx_M08	0.597265	FWM_M04	0.465998
ATXN7L2	HIP_M00	0.352329	TCx_M00	0.332122	PCx_M11	0.562682	FWM_M01	0.636482
ATXN7L3	HIP_M04	0.510658	TCx_M02	0.70358	PCx_M03	0.64849	FWM_M01	0.953874
ATXN7L3B	HIP_M02	0.549818	TCx_M04	0.824407	PCx_M03	0.538566	FWM_M01	0.820074
AUH	HIP_M10	0.437349	TCx_M04	0.573544	PCx_M00	0.368342	FWM_M00	0.286556
AUP1	HIP_M16	0.604826	TCx_M16	0.498141	PCx_M11	0.511621	FWM_M12	0.6031
AURKAIP1	HIP_M14	0.775559	TCx_M13	0.822743	PCx_M14	0.75818	FWM_M08	0.841577
AURKAPS1	HIP_M00	0.14568	TCx_M00	0.307858	PCx_M00	0.197136	FWM_M00	0.175689
AURKAPS2	HIP_M08	0.521469	TCx_M00	0.215682	PCx_M00	0.316216	FWM_M00	0.24913
AUTS2	HIP_M00	0.299397	TCx_M00	0.276385	PCx_M00	0.316034	FWM_M00	0.219949
AVEN	HIP_M16	0.500741	TCx_M00	0.192187	PCx_M00	0.277027	FWM_M00	0.253127
AVIL	HIP_M00	0.337762	TCx_M00	0.327553	PCx_M00	0.365403	FWM_M00	0.140183
AVL9	HIP_M02	0.714837	TCx_M04	0.811825	PCx_M03	0.509076	FWM_M01	0.783876
AVPI1	HIP_M14	0.496354	TCx_M03	0.46783	PCx_M14	0.611208	FWM_M09	0.603434
AXIN1	HIP_M14	0.709952	TCx_M13	0.696791	PCx_M14	0.733827	FWM_M10	0.662304
AXIN2	HIP_M00	0.38268	TCx_M00	0.393424	PCx_M00	0.272079	FWM_M01	0.83603
AXL	HIP_M15	0.574378	TCx_M17	0.538222	PCx_M00	0.273451	FWM_M17	0.454949
AZGP1	HIP_M00	0.38998	TCx_M19	0.575031	PCx_M00	0.36026	FWM_M12	0.579875
AZGP1P1	HIP_M00	0.350025	TCx_M19	0.526446	PCx_M00	0.298511	FWM_M12	0.481834
AZI2	HIP_M10	0.655116	TCx_M04	0.63196	PCx_M09	0.530495	FWM_M00	0.38645
AZIN1	HIP_M10	0.614971	TCx_M08	0.756686	PCx_M09	0.566973	FWM_M00	0.392214
AZIN2	HIP_M04	0.454538	TCx_M00	0.347915	PCx_M00	0.240639	FWM_M15	0.605941
B2M	HIP_M13	0.805198	TCx_M11	0.665047	PCx_M12	0.681069	FWM_M17	0.727511
B3GALNT1	HIP_M10	0.707828	TCx_M08	0.748727	PCx_M09	0.564561	FWM_M01	0.914111
B3GALNT1P1	HIP_M00	0.334474	TCx_M00	0.34603	PCx_M00	0.249791	FWM_M00	0.243439
B3GALNT2	HIP_M00	0.286237	TCx_M00	0.385765	PCx_M00	0.20624	FWM_M01	0.453967
B3GALT1	HIP_M02	0.767674	TCx_M01	0.551919	PCx_M03	0.591304	FWM_M01	0.926222
B3GALT2	HIP_M03	0.723617	TCx_M08	0.499926	PCx_M00	0.3977	FWM_M01	0.724215
B3GALT4	HIP_M14	0.522712	TCx_M13	0.527888	PCx_M00	0.34639	FWM_M10	0.492691
B3GALT5	HIP_M01	0.402537	TCx_M00	0.288463	PCx_M00	0.185997	FWM_M00	0.0931038
B3GALT5-AS1	HIP_M00	0.361123	TCx_M00	0.171506	PCx_M00	0.274497	FWM_M00	0.155504
B3GALT6	HIP_M14	0.447415	TCx_M13	0.539321	PCx_M14	0.423609	FWM_M08	0.436933
B3GALTL	HIP_M17	0.477546	TCx_M00	0.286389	PCx_M00	0.205148	FWM_M01	0.579787
B3GAT1	HIP_M14	0.487212	TCx_M13	0.63305	PCx_M14	0.636032	FWM_M12	0.810145
B3GAT2	HIP_M14	0.448852	TCx_M00	0.343076	PCx_M00	0.37932	FWM_M12	0.764215
B3GAT3	HIP_M14	0.822638	TCx_M13	0.781709	PCx_M14	0.776034	FWM_M08	0.696153
B3GNT2	HIP_M10	0.728099	TCx_M08	0.722196	PCx_M09	0.592864	FWM_M00	0.379073
B3GNT4	HIP_M00	0.395715	TCx_M00	0.399563	PCx_M14	0.504145	FWM_M01	0.81542
B3GNT5	HIP_M10	0.422585	TCx_M00	0.365554	PCx_M09	0.57199	FWM_M11	0.535254
B3GNT7	HIP_M00	0.366758	TCx_M18	0.412542	PCx_M17	0.524803	FWM_M15	0.611676
B3GNT9	HIP_M15	0.694112	TCx_M19	0.563402	PCx_M19	0.627981	FWM_M12	0.868976
B3GNTL1	HIP_M00	0.393043	TCx_M00	0.275434	PCx_M00	0.332854	FWM_M09	0.433401
B4GALNT1	HIP_M02	0.712569	TCx_M01	0.647763	PCx_M03	0.69209	FWM_M01	0.952374
B4GALNT3	HIP_M00	0.373942	TCx_M00	0.3922	PCx_M14	0.469528	FWM_M01	0.897755
B4GALNT4	HIP_M14	0.841107	TCx_M13	0.86488	PCx_M14	0.85489	FWM_M09	0.77824
B4GALT1	HIP_M18	0.598329	TCx_M18	0.577076	PCx_M18	0.55362	FWM_M13	0.776748
B4GALT2	HIP_M14	0.691247	TCx_M13	0.693674	PCx_M14	0.740528	FWM_M09	0.701894
B4GALT3	HIP_M12	0.463428	TCx_M10	0.479998	PCx_M00	0.357988	FWM_M09	0.498758
B4GALT4	HIP_M18	0.491633	TCx_M00	0.275239	PCx_M00	0.323783	FWM_M13	0.482258
B4GALT5	HIP_M05	0.762315	TCx_M03	0.591783	PCx_M03	0.571941	FWM_M01	0.748733
B4GALT6	HIP_M02	0.86405	TCx_M03	0.910556	PCx_M03	0.771179	FWM_M01	0.946154
B4GALT7	HIP_M14	0.657501	TCx_M13	0.688927	PCx_M14	0.616715	FWM_M08	0.709442
B4GAT1	HIP_M02	0.700998	TCx_M02	0.702319	PCx_M14	0.580117	FWM_M01	0.883871
B9D1	HIP_M15	0.545029	TCx_M15	0.594289	PCx_M16	0.609906	FWM_M00	0.379161
B9D2	HIP_M16	0.540199	TCx_M13	0.4833	PCx_M14	0.446593	FWM_M09	0.576424
bA255A11.4	HIP_M00	0.344744	TCx_M00	0.366921	PCx_M00	0.303812	FWM_M00	0.363882
BAALC	HIP_M06	0.692452	TCx_M15	0.525783	PCx_M16	0.50396	FWM_M01	0.56283
BAALC-AS1	HIP_M18	0.640038	TCx_M18	0.720066	PCx_M18	0.743825	FWM_M13	0.66834
BAATP1	HIP_M00	0.34104	TCx_M00	0.275991	PCx_M00	0.283104	FWM_M00	0.309493
BABAM1	HIP_M02	0.591703	TCx_M04	0.648686	PCx_M03	0.445924	FWM_M01	0.818549
BACE1	HIP_M19	0.559787	TCx_M19	0.624548	PCx_M19	0.692042	FWM_M15	0.923607
BACE1-AS	HIP_M00	0.277454	TCx_M00	0.145137	PCx_M00	0.207124	FWM_M00	0.217377
BACE2	HIP_M12	0.713171	TCx_M10	0.690539	PCx_M11	0.67361	FWM_M06	0.696103
BACH1	HIP_M18	0.561763	TCx_M00	0.303981	PCx_M20	0.533097	FWM_M02	0.749898
BACH2	HIP_M00	0.344276	TCx_M00	0.36669	PCx_M00	0.302146	FWM_M16	0.859804
BAD	HIP_M14	0.909598	TCx_M13	0.894408	PCx_M14	0.885211	FWM_M08	0.93255
BAG1	HIP_M18	0.414039	TCx_M06	0.452917	PCx_M04	0.580191	FWM_M02	0.694498
BAG2	HIP_M12	0.73076	TCx_M10	0.77226	PCx_M11	0.778729	FWM_M06	0.790671
BAG3	HIP_M12	0.704204	TCx_M10	0.536323	PCx_M18	0.648639	FWM_M06	0.808014
BAG4	HIP_M10	0.82168	TCx_M08	0.771914	PCx_M03	0.694697	FWM_M01	0.884161
BAG5	HIP_M10	0.697916	TCx_M08	0.668005	PCx_M09	0.553412	FWM_M00	0.392185
BAG6	HIP_M14	0.599255	TCx_M13	0.63217	PCx_M14	0.62459	FWM_M09	0.701604
BAHCC1	HIP_M14	0.827842	TCx_M13	0.830003	PCx_M14	0.78383	FWM_M12	0.62787
BAHD1	HIP_M12	0.536648	TCx_M10	0.507115	PCx_M11	0.555034	FWM_M00	0.342972
BAIAP2	HIP_M14	0.622735	TCx_M13	0.703065	PCx_M14	0.717247	FWM_M09	0.729704
BAIAP2-AS1	HIP_M00	0.292885	TCx_M02	0.591528	PCx_M00	0.399076	FWM_M01	0.841053
BAIAP3	HIP_M14	0.73489	TCx_M13	0.717437	PCx_M14	0.777922	FWM_M09	0.834479
BAK1	HIP_M18	0.555159	TCx_M00	0.303162	PCx_M18	0.429789	FWM_M00	0.367961
BAMBI	HIP_M12	0.527311	TCx_M17	0.525068	PCx_M19	0.48029	FWM_M16	0.837137
BANF1	HIP_M12	0.571177	TCx_M00	0.329044	PCx_M00	0.337653	FWM_M06	0.71609
BANF1P3	HIP_M00	0.347852	TCx_M00	0.216048	PCx_M00	0.212345	FWM_M00	0.277356
BANP	HIP_M12	0.819691	TCx_M10	0.738825	PCx_M11	0.809004	FWM_M06	0.841813
BAP1	HIP_M04	0.529067	TCx_M13	0.735438	PCx_M14	0.73497	FWM_M01	0.896427
BARD1	HIP_M19	0.505315	TCx_M00	0.247031	PCx_M00	0.381288	FWM_M02	0.770351
BASP1	HIP_M02	0.798552	TCx_M01	0.82708	PCx_M03	0.711384	FWM_M01	0.945707
BATF3	HIP_M00	0.283835	TCx_M00	0.318709	PCx_M00	0.303927	FWM_M14	0.524506
BAX	HIP_M00	0.378919	TCx_M16	0.430348	PCx_M00	0.196553	FWM_M12	0.564326
BAZ1A	HIP_M18	0.601408	TCx_M18	0.617059	PCx_M19	0.531414	FWM_M16	0.896496
BAZ1B	HIP_M09	0.567225	TCx_M07	0.704836	PCx_M07	0.785468	FWM_M16	0.67242
BAZ2A	HIP_M09	0.677907	TCx_M07	0.576289	PCx_M07	0.497548	FWM_M04	0.583313
BAZ2B	HIP_M19	0.590836	TCx_M07	0.618455	PCx_M07	0.609876	FWM_M15	0.86866
BBIP1	HIP_M10	0.663519	TCx_M08	0.479677	PCx_M09	0.709903	FWM_M15	0.839179
BBOX1	HIP_M15	0.718068	TCx_M15	0.599424	PCx_M16	0.531102	FWM_M00	0.209012
BBOX1-AS1	HIP_M14	0.604823	TCx_M13	0.625639	PCx_M14	0.609553	FWM_M09	0.618961
BBS1	HIP_M00	0.389043	TCx_M00	0.321999	PCx_M00	0.244375	FWM_M01	0.884839
BBS10	HIP_M10	0.691608	TCx_M08	0.739794	PCx_M09	0.600983	FWM_M16	0.474263
BBS12	HIP_M05	0.537825	TCx_M04	0.432524	PCx_M03	0.49338	FWM_M01	0.848464
BBS2	HIP_M15	0.678522	TCx_M15	0.511918	PCx_M16	0.636903	FWM_M15	0.740278
BBS4	HIP_M06	0.737672	TCx_M15	0.636716	PCx_M16	0.733545	FWM_M00	0.131882
BBS5	HIP_M14	0.741977	TCx_M13	0.815651	PCx_M14	0.767501	FWM_M08	0.720291
BBS7	HIP_M02	0.629232	TCx_M01	0.678976	PCx_M03	0.577896	FWM_M01	0.857179
BBS9	HIP_M00	0.356647	TCx_M00	0.317354	PCx_M00	0.346643	FWM_M16	0.665147
BBX	HIP_M19	0.506359	TCx_M19	0.653655	PCx_M19	0.682133	FWM_M16	0.945408
BCAM	HIP_M14	0.644395	TCx_M16	0.65238	PCx_M14	0.469846	FWM_M07	0.466309
BCAN	HIP_M14	0.494512	TCx_M13	0.6	PCx_M14	0.42658	FWM_M10	0.69015
BCAP29	HIP_M10	0.644313	TCx_M04	0.634894	PCx_M09	0.570215	FWM_M01	0.778367
BCAP31	HIP_M05	0.670171	TCx_M04	0.521282	PCx_M00	0.383567	FWM_M01	0.773392
BCAR1	HIP_M14	0.914823	TCx_M13	0.879963	PCx_M14	0.831232	FWM_M10	0.870073
BCAR3	HIP_M17	0.551035	TCx_M17	0.572932	PCx_M17	0.432386	FWM_M00	0.328223
BCAS1	HIP_M19	0.745733	TCx_M19	0.747624	PCx_M19	0.837591	FWM_M15	0.894314
BCAS2	HIP_M06	0.65219	TCx_M04	0.838628	PCx_M04	0.465099	FWM_M01	0.431336
BCAS2P1	HIP_M14	0.90602	TCx_M13	0.907906	PCx_M14	0.909022	FWM_M08	0.858464
BCAS3	HIP_M19	0.465573	TCx_M04	0.477696	PCx_M00	0.350879	FWM_M00	0.370821
BCAS4	HIP_M02	0.488115	TCx_M02	0.636595	PCx_M14	0.510455	FWM_M01	0.925617
BCAT1	HIP_M10	0.610979	TCx_M03	0.733898	PCx_M09	0.594016	FWM_M01	0.508005
BCAT2	HIP_M16	0.629758	TCx_M13	0.494807	PCx_M14	0.47733	FWM_M10	0.625815
BCCIP	HIP_M00	0.274881	TCx_M10	0.460877	PCx_M07	0.494089	FWM_M06	0.499801
BCDIN3D	HIP_M00	0.368764	TCx_M00	0.186253	PCx_M00	0.38879	FWM_M15	0.552466
BCDIN3D-AS1	HIP_M00	0.211777	TCx_M15	0.445733	PCx_M02	0.453243	FWM_M00	0.287728
BCHE	HIP_M00	0.374789	TCx_M00	0.305932	PCx_M19	0.520339	FWM_M15	0.753326
BCKDHA	HIP_M15	0.654101	TCx_M13	0.577239	PCx_M04	0.682104	FWM_M10	0.739159
BCKDHB	HIP_M15	0.717721	TCx_M15	0.65827	PCx_M16	0.725647	FWM_M15	0.795525
BCKDK	HIP_M14	0.760401	TCx_M13	0.717469	PCx_M14	0.742872	FWM_M09	0.689349
BCL10	HIP_M05	0.539266	TCx_M08	0.456164	PCx_M15	0.450162	FWM_M00	0.323554
BCL11A	HIP_M04	0.523942	TCx_M01	0.689074	PCx_M03	0.610825	FWM_M01	0.92529
BCL11B	HIP_M04	0.767886	TCx_M01	0.55819	PCx_M03	0.465093	FWM_M01	0.900456
BCL2	HIP_M17	0.448787	TCx_M17	0.668058	PCx_M17	0.455386	FWM_M16	0.658133
BCL2A1	HIP_M18	0.783746	TCx_M18	0.756257	PCx_M18	0.762833	FWM_M14	0.868086
BCL2L1	HIP_M16	0.629412	TCx_M00	0.394117	PCx_M00	0.278989	FWM_M16	0.728067
BCL2L11	HIP_M16	0.457256	TCx_M10	0.471847	PCx_M11	0.408647	FWM_M16	0.713999
BCL2L13	HIP_M00	0.33283	TCx_M00	0.398506	PCx_M03	0.408913	FWM_M01	0.700019
BCL2L2	HIP_M03	0.427375	TCx_M03	0.697765	PCx_M03	0.554071	FWM_M01	0.587759
BCL2L2-PABPN1	HIP_M00	0.229611	TCx_M00	0.39638	PCx_M00	0.345578	FWM_M00	0.350461
BCL6	HIP_M16	0.674769	TCx_M10	0.549586	PCx_M18	0.738135	FWM_M13	0.866836
BCL7A	HIP_M00	0.335589	TCx_M02	0.549465	PCx_M03	0.53457	FWM_M01	0.898406
BCL7B	HIP_M04	0.414042	TCx_M00	0.355864	PCx_M03	0.40565	FWM_M01	0.802752
BCL7C	HIP_M14	0.622205	TCx_M16	0.614565	PCx_M14	0.461056	FWM_M10	0.839541
BCL9	HIP_M09	0.661701	TCx_M07	0.461148	PCx_M07	0.492597	FWM_M04	0.481118
BCL9L	HIP_M16	0.664627	TCx_M16	0.812909	PCx_M14	0.648196	FWM_M09	0.611248
BCLAF1	HIP_M10	0.500219	TCx_M04	0.426097	PCx_M16	0.454922	FWM_M11	0.416483
BCO1	HIP_M00	0.377307	TCx_M18	0.420399	PCx_M00	0.357948	FWM_M00	0.227928
BCO2	HIP_M12	0.590804	TCx_M10	0.602705	PCx_M11	0.568996	FWM_M06	0.786002
BCOR	HIP_M00	0.328393	TCx_M10	0.49722	PCx_M15	0.679164	FWM_M16	0.626355
BCORL1	HIP_M09	0.658439	TCx_M07	0.515293	PCx_M11	0.457818	FWM_M04	0.566847
BCR	HIP_M14	0.506281	TCx_M13	0.62632	PCx_M14	0.672109	FWM_M09	0.835448
BCS1L	HIP_M00	0.275552	TCx_M00	0.285001	PCx_M00	0.345419	FWM_M00	0.356663
BCYRN1	HIP_M00	0.387163	TCx_M07	0.428706	PCx_M07	0.446949	FWM_M00	0.370983
BCYRN1P1	HIP_M09	0.530724	TCx_M07	0.557917	PCx_M07	0.506056	FWM_M04	0.539587
BCYRN1P3	HIP_M00	0.13077	TCx_M00	0.212415	PCx_M00	0.207287	FWM_M00	0.243391
BDH1	HIP_M06	0.527514	TCx_M15	0.583064	PCx_M16	0.49469	FWM_M01	0.865672
BDH2	HIP_M15	0.48849	TCx_M00	0.270761	PCx_M00	0.366897	FWM_M16	0.696073
BDNF	HIP_M01	0.696939	TCx_M14	0.76488	PCx_M15	0.72579	FWM_M01	0.625579
BDNF-AS	HIP_M01	0.640158	TCx_M15	0.727856	PCx_M16	0.556356	FWM_M15	0.795692
BDP1	HIP_M09	0.441076	TCx_M07	0.576529	PCx_M07	0.610173	FWM_M04	0.644294
BEAN1	HIP_M00	0.259984	TCx_M00	0.336445	PCx_M14	0.475685	FWM_M09	0.541085
BECN1	HIP_M06	0.712822	TCx_M04	0.728626	PCx_M16	0.550596	FWM_M00	0.319385
BECN1P2	HIP_M17	0.552488	TCx_M19	0.454784	PCx_M19	0.514216	FWM_M15	0.611743
BEGAIN	HIP_M14	0.768662	TCx_M13	0.763604	PCx_M14	0.849787	FWM_M09	0.84807
BEND3P3	HIP_M09	0.520295	TCx_M00	0.325511	PCx_M00	0.316464	FWM_M04	0.456268
BEND5	HIP_M00	0.362877	TCx_M14	0.693311	PCx_M15	0.483585	FWM_M01	0.828329
BEND6	HIP_M02	0.697741	TCx_M03	0.772482	PCx_M03	0.620708	FWM_M01	0.86769
BEND7	HIP_M16	0.452873	TCx_M00	0.252463	PCx_M00	0.260917	FWM_M01	0.422329
BEND7P1	HIP_M12	0.457235	TCx_M10	0.441194	PCx_M11	0.414308	FWM_M01	0.470063
BEST1	HIP_M15	0.768986	TCx_M19	0.767047	PCx_M19	0.82678	FWM_M15	0.930231
BEST3	HIP_M00	0.312838	TCx_M07	0.450294	PCx_M19	0.420808	FWM_M14	0.60369
BET1	HIP_M10	0.81888	TCx_M08	0.773462	PCx_M09	0.70462	FWM_M00	0.395877
BET1L	HIP_M19	0.440768	TCx_M00	0.221693	PCx_M00	0.342278	FWM_M12	0.480441
BEX1	HIP_M02	0.834902	TCx_M01	0.864076	PCx_M03	0.603578	FWM_M01	0.830192
BEX2	HIP_M02	0.82791	TCx_M01	0.710364	PCx_M04	0.523754	FWM_M01	0.793553
BEX4	HIP_M02	0.768963	TCx_M04	0.786414	PCx_M09	0.515177	FWM_M01	0.553497
BEX5	HIP_M02	0.774057	TCx_M03	0.682486	PCx_M03	0.471853	FWM_M01	0.844902
BFAR	HIP_M18	0.444995	TCx_M00	0.396522	PCx_M00	0.301891	FWM_M02	0.511439
BGN	HIP_M16	0.649312	TCx_M18	0.414863	PCx_M13	0.504492	FWM_M12	0.813119
BHLHB9	HIP_M05	0.880193	TCx_M03	0.685848	PCx_M03	0.689971	FWM_M01	0.835398
BHLHE22	HIP_M04	0.646299	TCx_M03	0.452271	PCx_M03	0.493167	FWM_M01	0.682454
BHLHE40	HIP_M18	0.466565	TCx_M14	0.57155	PCx_M15	0.682795	FWM_M11	0.620549
BHLHE40-AS1	HIP_M00	0.210773	TCx_M00	0.378784	PCx_M00	0.298508	FWM_M00	0.0582686
BHLHE41	HIP_M00	0.390563	TCx_M07	0.476187	PCx_M07	0.420444	FWM_M16	0.792012
BHMT2	HIP_M00	0.251971	TCx_M00	0.243241	PCx_M01	0.423335	FWM_M00	0.238518
BICC1	HIP_M00	0.29484	TCx_M03	0.436297	PCx_M00	0.369032	FWM_M01	0.79774
BICD1	HIP_M00	0.398015	TCx_M08	0.465047	PCx_M08	0.529742	FWM_M01	0.805266
BICD2	HIP_M14	0.596991	TCx_M13	0.562405	PCx_M14	0.588981	FWM_M10	0.52778
BID	HIP_M00	0.310969	TCx_M03	0.636834	PCx_M03	0.611064	FWM_M01	0.821445
BIN1	HIP_M14	0.631948	TCx_M19	0.73918	PCx_M19	0.744719	FWM_M15	0.908132
BIN2	HIP_M20	0.63717	TCx_M20	0.720544	PCx_M20	0.663641	FWM_M17	0.85892
BIN3	HIP_M14	0.442299	TCx_M00	0.374826	PCx_M00	0.383524	FWM_M09	0.436324
BIRC2	HIP_M10	0.539867	TCx_M08	0.66139	PCx_M09	0.659216	FWM_M16	0.759895
BIRC3	HIP_M00	0.397607	TCx_M00	0.327343	PCx_M19	0.441496	FWM_M06	0.591576
BIRC6	HIP_M06	0.545257	TCx_M15	0.458011	PCx_M19	0.698895	FWM_M15	0.915277
BIRC6-AS2	HIP_M00	0.164165	TCx_M00	0.163179	PCx_M00	0.184441	FWM_M00	0.336724
BISPR	HIP_M00	0.345513	TCx_M00	0.229987	PCx_M00	0.270256	FWM_M16	0.447021
BIVM	HIP_M10	0.529039	TCx_M08	0.60113	PCx_M09	0.483375	FWM_M01	0.561044
BIVM-ERCC5	HIP_M00	0.305027	TCx_M07	0.558643	PCx_M07	0.56116	FWM_M04	0.490815
BLCAP	HIP_M05	0.80469	TCx_M03	0.612573	PCx_M03	0.659617	FWM_M01	0.956829
BLID	HIP_M00	0.381055	TCx_M19	0.517064	PCx_M19	0.54209	FWM_M16	0.817369
BLM	HIP_M00	0.272711	TCx_M00	0.349218	PCx_M00	0.357001	FWM_M02	0.414943
BLMH	HIP_M00	0.370073	TCx_M04	0.453289	PCx_M04	0.458604	FWM_M00	0.321197
BLNK	HIP_M00	0.399846	TCx_M20	0.680991	PCx_M20	0.478151	FWM_M17	0.749791
BLOC1S1	HIP_M06	0.698621	TCx_M15	0.472092	PCx_M04	0.652958	FWM_M10	0.619158
BLOC1S1-RDH5	HIP_M00	0.335654	TCx_M00	0.178812	PCx_M00	0.204399	FWM_M15	0.567965
BLOC1S2	HIP_M10	0.643815	TCx_M04	0.722069	PCx_M09	0.523911	FWM_M01	0.532694
BLOC1S3	HIP_M00	0.271614	TCx_M00	0.203442	PCx_M00	0.22484	FWM_M16	0.488842
BLOC1S4	HIP_M00	0.274485	TCx_M00	0.346615	PCx_M00	0.35338	FWM_M00	0.387716
BLOC1S5	HIP_M00	0.384262	TCx_M00	0.334853	PCx_M00	0.358299	FWM_M00	0.358103
BLOC1S5-TXNDC5	HIP_M00	0.226726	TCx_M00	0.253005	PCx_M00	0.276852	FWM_M00	0.205263
BLOC1S6	HIP_M10	0.84818	TCx_M08	0.855675	PCx_M09	0.750335	FWM_M01	0.457878
BLVRA	HIP_M06	0.519957	TCx_M04	0.737443	PCx_M04	0.495415	FWM_M01	0.807264
BLVRB	HIP_M14	0.627333	TCx_M13	0.57716	PCx_M04	0.626312	FWM_M08	0.660108
BLZF1	HIP_M10	0.496348	TCx_M08	0.553909	PCx_M09	0.436878	FWM_M00	0.210574
BLZF2P	HIP_M08	0.467608	TCx_M00	0.323373	PCx_M01	0.63746	FWM_M12	0.408569
BMI1	HIP_M12	0.568709	TCx_M10	0.595176	PCx_M11	0.537427	FWM_M16	0.705124
BMP1	HIP_M16	0.631763	TCx_M16	0.494254	PCx_M14	0.490267	FWM_M12	0.788007
BMP2	HIP_M01	0.410955	TCx_M00	0.274855	PCx_M18	0.508795	FWM_M13	0.667537
BMP2K	HIP_M15	0.659207	TCx_M20	0.588544	PCx_M16	0.569465	FWM_M17	0.77481
BMP2KL	HIP_M06	0.425305	TCx_M15	0.61788	PCx_M16	0.527571	FWM_M01	0.748249
BMP4	HIP_M12	0.599185	TCx_M00	0.357567	PCx_M11	0.403667	FWM_M01	0.630671
BMP6	HIP_M00	0.287948	TCx_M17	0.599918	PCx_M13	0.471498	FWM_M07	0.648454
BMP7	HIP_M00	0.292925	TCx_M16	0.602558	PCx_M00	0.27773	FWM_M12	0.619609
BMP8A	HIP_M00	0.225234	TCx_M00	0.369723	PCx_M00	0.232496	FWM_M15	0.575174
BMP8B	HIP_M00	0.328371	TCx_M19	0.598782	PCx_M00	0.386609	FWM_M15	0.777162
BMPER	HIP_M03	0.815466	TCx_M01	0.58514	PCx_M03	0.470043	FWM_M01	0.906582
BMPR1A	HIP_M12	0.424891	TCx_M10	0.428384	PCx_M00	0.335454	FWM_M13	0.521517
BMPR1B	HIP_M15	0.549586	TCx_M17	0.663782	PCx_M16	0.48812	FWM_M00	0.246173
BMPR2	HIP_M05	0.748296	TCx_M03	0.737056	PCx_M03	0.666322	FWM_M01	0.945365
BMS1	HIP_M05	0.422726	TCx_M03	0.450801	PCx_M07	0.458451	FWM_M01	0.561808
BMS1P10	HIP_M00	0.346373	TCx_M00	0.367667	PCx_M08	0.428606	FWM_M01	0.462782
BMS1P17	HIP_M01	0.420676	TCx_M00	0.290347	PCx_M00	0.244265	FWM_M01	0.479427
BMS1P18	HIP_M01	0.420676	TCx_M00	0.290347	PCx_M00	0.244265	FWM_M01	0.479427
BMS1P20	HIP_M00	0.298932	TCx_M00	0.351162	PCx_M00	0.366972	FWM_M00	0.387364
BMS1P4	HIP_M00	0.241461	TCx_M00	0.394912	PCx_M19	0.423082	FWM_M15	0.625897
BMS1P5	HIP_M00	0.343407	TCx_M00	0.251511	PCx_M09	0.452286	FWM_M00	0.222979
BMS1P6	HIP_M00	0.328594	TCx_M15	0.441048	PCx_M16	0.53283	FWM_M00	0.338152
BMS1P7	HIP_M00	0.369143	TCx_M15	0.448041	PCx_M16	0.463878	FWM_M00	0.0993883
BMS1P9	HIP_M00	0.335765	TCx_M00	0.330257	PCx_M00	0.395477	FWM_M01	0.528546
BNC2	HIP_M00	0.267313	TCx_M20	0.412031	PCx_M00	0.375307	FWM_M17	0.764625
BNIP1	HIP_M00	0.370682	TCx_M00	0.338848	PCx_M00	0.353841	FWM_M00	0.251846
BNIP2	HIP_M10	0.541251	TCx_M17	0.651633	PCx_M09	0.559926	FWM_M15	0.774319
BNIP3	HIP_M10	0.670141	TCx_M08	0.699202	PCx_M09	0.618764	FWM_M00	0.349769
BNIP3L	HIP_M10	0.761679	TCx_M08	0.695084	PCx_M09	0.738134	FWM_M15	0.757387
BNIP3P10	HIP_M00	0.109458	TCx_M00	0.221705	PCx_M00	0.3416	FWM_M00	0.291652
BNIP3P25	HIP_M00	0.255006	TCx_M19	0.479412	PCx_M19	0.608102	FWM_M15	0.785414
BNIP3P40	HIP_M00	0.338118	TCx_M00	0.176939	PCx_M09	0.425078	FWM_M00	0.18948
BNIP3P5	HIP_M00	0.369607	TCx_M00	0.204192	PCx_M00	0.345143	FWM_M00	0.378306
BNIPL	HIP_M12	0.400428	TCx_M00	0.293486	PCx_M01	0.593892	FWM_M06	0.519973
BOC	HIP_M16	0.650644	TCx_M16	0.608798	PCx_M18	0.423775	FWM_M13	0.56631
BOD1	HIP_M00	0.39585	TCx_M04	0.577294	PCx_M00	0.39266	FWM_M02	0.46842
BOD1L1	HIP_M09	0.600701	TCx_M07	0.698001	PCx_M07	0.742973	FWM_M04	0.621375
BOK	HIP_M19	0.56912	TCx_M19	0.724503	PCx_M19	0.664003	FWM_M12	0.906057
BOLA1	HIP_M14	0.510725	TCx_M13	0.47176	PCx_M14	0.412219	FWM_M10	0.553047
BOLA2	HIP_M00	0.247179	TCx_M00	0.264546	PCx_M00	0.35158	FWM_M00	0.223504
BOLA2B	HIP_M14	0.617828	TCx_M13	0.647485	PCx_M14	0.626258	FWM_M10	0.752287
BOLA3	HIP_M10	0.459027	TCx_M04	0.709763	PCx_M04	0.424955	FWM_M01	0.54246
BOLA3-AS1	HIP_M00	0.36099	TCx_M00	0.270457	PCx_M03	0.421825	FWM_M01	0.650924
BOP1	HIP_M14	0.827744	TCx_M13	0.908854	PCx_M14	0.90023	FWM_M09	0.863857
BPGM	HIP_M06	0.52301	TCx_M04	0.583962	PCx_M16	0.506321	FWM_M15	0.408127
BPHL	HIP_M00	0.325347	TCx_M04	0.419976	PCx_M16	0.414434	FWM_M00	0.271458
BPIFB5P	HIP_M12	0.433745	TCx_M10	0.629275	PCx_M11	0.568218	FWM_M00	0.264094
BPIFB9P	HIP_M12	0.483954	TCx_M10	0.57053	PCx_M11	0.693134	FWM_M01	0.401092
BPNT1	HIP_M06	0.607213	TCx_M00	0.371578	PCx_M16	0.5128	FWM_M15	0.504979
BPTF	HIP_M09	0.668026	TCx_M07	0.666314	PCx_M07	0.670802	FWM_M16	0.844814
BRAF	HIP_M02	0.486369	TCx_M04	0.469324	PCx_M07	0.539532	FWM_M01	0.628499
BRAP	HIP_M00	0.379246	TCx_M08	0.476569	PCx_M00	0.349971	FWM_M00	0.188409
BRAT1	HIP_M14	0.900503	TCx_M13	0.892988	PCx_M14	0.893137	FWM_M08	0.903665
BRCA1	HIP_M19	0.55383	TCx_M19	0.705445	PCx_M19	0.604796	FWM_M16	0.896936
BRCA1P1	HIP_M00	0.143015	TCx_M00	0.202956	PCx_M01	0.561522	FWM_M00	0.180713
BRCC3	HIP_M02	0.580761	TCx_M00	0.381726	PCx_M00	0.337773	FWM_M01	0.784468
BRCC3P1	HIP_M00	0.278823	TCx_M10	0.491179	PCx_M11	0.554817	FWM_M01	0.520536
BRD1	HIP_M14	0.737991	TCx_M13	0.80449	PCx_M14	0.718973	FWM_M08	0.757309
BRD2	HIP_M09	0.560416	TCx_M07	0.640745	PCx_M07	0.690019	FWM_M11	0.654744
BRD3	HIP_M14	0.454566	TCx_M13	0.570423	PCx_M00	0.3313	FWM_M12	0.611531
BRD4	HIP_M09	0.598982	TCx_M16	0.591223	PCx_M11	0.49517	FWM_M09	0.521199
BRD7	HIP_M00	0.389674	TCx_M07	0.456337	PCx_M07	0.496974	FWM_M16	0.86723
BRD7P3	HIP_M00	0.267012	TCx_M10	0.450723	PCx_M08	0.404739	FWM_M00	0.195135
BRD7P4	HIP_M09	0.485092	TCx_M00	0.286215	PCx_M08	0.406191	FWM_M00	0.349479
BRD8	HIP_M09	0.485502	TCx_M07	0.416703	PCx_M07	0.490764	FWM_M04	0.463594
BRD9	HIP_M14	0.403472	TCx_M00	0.291305	PCx_M00	0.34427	FWM_M10	0.662128
BRE	HIP_M06	0.666252	TCx_M15	0.654095	PCx_M16	0.468114	FWM_M01	0.686835
BRF1	HIP_M14	0.878834	TCx_M13	0.876471	PCx_M14	0.852847	FWM_M10	0.813345
BRF2	HIP_M06	0.495257	TCx_M04	0.622586	PCx_M04	0.548319	FWM_M09	0.407777
BRI3	HIP_M00	0.329362	TCx_M16	0.420733	PCx_M00	0.215138	FWM_M17	0.6056
BRI3BP	HIP_M14	0.605317	TCx_M13	0.628411	PCx_M14	0.658205	FWM_M09	0.823296
BRICD5	HIP_M14	0.654609	TCx_M13	0.770327	PCx_M14	0.783033	FWM_M08	0.67879
BRINP1	HIP_M02	0.763125	TCx_M03	0.762682	PCx_M03	0.585444	FWM_M01	0.933782
BRINP2	HIP_M00	0.384282	TCx_M02	0.679075	PCx_M03	0.604226	FWM_M01	0.937743
BRINP3	HIP_M03	0.707718	TCx_M00	0.292713	PCx_M00	0.398017	FWM_M01	0.811818
BRIP1	HIP_M08	0.499671	TCx_M13	0.495736	PCx_M00	0.328397	FWM_M00	0.390227
BRIX1	HIP_M06	0.50123	TCx_M04	0.497999	PCx_M04	0.568966	FWM_M15	0.569864
BRK1	HIP_M06	0.502864	TCx_M04	0.646689	PCx_M00	0.382597	FWM_M01	0.646981
BRMS1	HIP_M14	0.537867	TCx_M13	0.405262	PCx_M04	0.571997	FWM_M10	0.784404
BRMS1L	HIP_M10	0.822132	TCx_M08	0.790654	PCx_M09	0.69075	FWM_M01	0.620181
BROX	HIP_M10	0.587703	TCx_M08	0.425414	PCx_M09	0.645533	FWM_M15	0.791058
BRPF1	HIP_M14	0.496841	TCx_M13	0.438222	PCx_M14	0.434413	FWM_M10	0.476919
BRPF3	HIP_M12	0.612746	TCx_M00	0.384264	PCx_M11	0.637115	FWM_M01	0.457816
BRSK1	HIP_M14	0.636139	TCx_M13	0.781251	PCx_M14	0.828928	FWM_M09	0.88231
BRSK2	HIP_M14	0.704505	TCx_M13	0.841789	PCx_M14	0.839439	FWM_M09	0.911408
BRWD1	HIP_M10	0.851935	TCx_M08	0.798057	PCx_M09	0.745789	FWM_M01	0.514692
BRWD3	HIP_M00	0.393181	TCx_M00	0.247915	PCx_M00	0.359104	FWM_M11	0.624368
BSCL2	HIP_M02	0.825743	TCx_M03	0.778441	PCx_M03	0.736198	FWM_M01	0.926978
BSDC1	HIP_M00	0.310482	TCx_M00	0.274674	PCx_M00	0.317652	FWM_M12	0.450982
BSG	HIP_M14	0.792445	TCx_M13	0.76243	PCx_M14	0.668574	FWM_M09	0.766817
BSN	HIP_M14	0.448252	TCx_M13	0.505425	PCx_M14	0.527521	FWM_M01	0.919903
BSN-AS2	HIP_M00	0.358205	TCx_M00	0.218143	PCx_M01	0.514409	FWM_M00	0.262561
BST2	HIP_M12	0.49856	TCx_M18	0.51474	PCx_M20	0.438898	FWM_M13	0.568131
BTAF1	HIP_M06	0.535622	TCx_M15	0.481873	PCx_M16	0.530894	FWM_M15	0.827271
BTBD1	HIP_M10	0.827069	TCx_M08	0.805098	PCx_M09	0.718774	FWM_M00	0.197008
BTBD10	HIP_M02	0.585635	TCx_M04	0.678146	PCx_M03	0.492951	FWM_M01	0.799632
BTBD10P2	HIP_M00	0.161106	TCx_M00	0.144546	PCx_M00	0.134881	FWM_M00	0.364808
BTBD11	HIP_M03	0.691332	TCx_M03	0.751147	PCx_M03	0.625577	FWM_M01	0.858091
BTBD16	HIP_M15	0.453991	TCx_M19	0.494902	PCx_M19	0.624887	FWM_M15	0.780323
BTBD18	HIP_M12	0.476576	TCx_M00	0.376365	PCx_M00	0.365049	FWM_M00	0.324148
BTBD2	HIP_M14	0.868251	TCx_M13	0.904079	PCx_M14	0.931474	FWM_M09	0.956351
BTBD3	HIP_M02	0.760712	TCx_M03	0.640551	PCx_M03	0.53371	FWM_M15	0.500877
BTBD6	HIP_M00	0.354655	TCx_M13	0.502131	PCx_M14	0.518878	FWM_M01	0.826336
BTBD7	HIP_M00	0.361094	TCx_M08	0.440073	PCx_M00	0.291319	FWM_M00	0.310885
BTBD7P1	HIP_M00	0.288296	TCx_M00	0.305297	PCx_M00	0.205934	FWM_M00	0.300541
BTBD8	HIP_M19	0.602162	TCx_M00	0.338812	PCx_M19	0.492381	FWM_M16	0.830268
BTBD9	HIP_M01	0.847119	TCx_M03	0.577209	PCx_M03	0.573471	FWM_M01	0.94112
BTD	HIP_M15	0.629898	TCx_M00	0.36962	PCx_M16	0.562635	FWM_M15	0.762533
BTF3	HIP_M06	0.631943	TCx_M04	0.515099	PCx_M04	0.733436	FWM_M02	0.870173
BTF3L4	HIP_M10	0.817413	TCx_M08	0.725706	PCx_M09	0.702044	FWM_M00	0.263573
BTF3L4P2	HIP_M00	0.212169	TCx_M00	0.269711	PCx_M00	0.359869	FWM_M16	0.77529
BTF3P12	HIP_M00	0.30915	TCx_M00	0.231797	PCx_M00	0.213788	FWM_M00	0.313143
BTF3P16	HIP_M00	0.355447	TCx_M00	0.308413	PCx_M00	0.322664	FWM_M00	0.394253
BTF3P3	HIP_M00	0.346895	TCx_M00	0.374856	PCx_M00	0.184657	FWM_M00	0.145135
BTG1	HIP_M05	0.413185	TCx_M08	0.532552	PCx_M18	0.518991	FWM_M11	0.749495
BTG2	HIP_M18	0.740418	TCx_M18	0.633935	PCx_M18	0.718921	FWM_M13	0.793661
BTG3	HIP_M18	0.561453	TCx_M18	0.513929	PCx_M18	0.556548	FWM_M15	0.728894
BTK	HIP_M20	0.75896	TCx_M20	0.721727	PCx_M20	0.731028	FWM_M17	0.914483
BTN2A1	HIP_M05	0.593173	TCx_M00	0.393516	PCx_M11	0.466247	FWM_M00	0.355568
BTN2A2	HIP_M12	0.407487	TCx_M10	0.551565	PCx_M11	0.486586	FWM_M06	0.485227
BTN3A1	HIP_M13	0.768796	TCx_M11	0.674905	PCx_M12	0.726604	FWM_M17	0.595694
BTN3A2	HIP_M13	0.508094	TCx_M11	0.4707	PCx_M12	0.438868	FWM_M17	0.596375
BTN3A3	HIP_M13	0.579293	TCx_M11	0.520805	PCx_M12	0.408288	FWM_M00	0.396988
BTNL9	HIP_M01	0.448842	TCx_M16	0.498805	PCx_M00	0.31189	FWM_M00	0.0937686
BTRC	HIP_M02	0.721631	TCx_M03	0.576597	PCx_M03	0.687178	FWM_M01	0.929781
BUB3	HIP_M00	0.298813	TCx_M00	0.35992	PCx_M04	0.430145	FWM_M16	0.783925
BUD13	HIP_M19	0.412206	TCx_M00	0.2952	PCx_M00	0.354684	FWM_M15	0.653674
BUD31	HIP_M18	0.411827	TCx_M04	0.478053	PCx_M04	0.473668	FWM_M00	0.393413
BVES	HIP_M19	0.498748	TCx_M19	0.700641	PCx_M19	0.615807	FWM_M16	0.896084
BYSL	HIP_M00	0.386517	TCx_M00	0.291616	PCx_M00	0.384669	FWM_M00	0.352327
BZRAP1	HIP_M14	0.597189	TCx_M13	0.708269	PCx_M14	0.794771	FWM_M01	0.955738
BZW1	HIP_M06	0.670156	TCx_M04	0.59696	PCx_M16	0.551253	FWM_M15	0.595582
BZW1P2	HIP_M00	0.399504	TCx_M00	0.196093	PCx_M08	0.469843	FWM_M01	0.741129
BZW2	HIP_M06	0.709862	TCx_M01	0.642917	PCx_M04	0.457062	FWM_M01	0.738405
C10orf10	HIP_M18	0.815838	TCx_M18	0.774134	PCx_M18	0.795565	FWM_M13	0.756775
C10orf105	HIP_M17	0.641881	TCx_M17	0.766492	PCx_M17	0.670098	FWM_M16	0.710572
C10orf107	HIP_M15	0.669213	TCx_M15	0.690025	PCx_M16	0.602576	FWM_M15	0.5019
C10orf11	HIP_M15	0.413531	TCx_M00	0.325671	PCx_M00	0.312525	FWM_M17	0.564222
C10orf113	HIP_M12	0.413756	TCx_M00	0.256973	PCx_M00	0.240787	FWM_M00	0.357133
C10orf12	HIP_M12	0.475098	TCx_M00	0.330041	PCx_M07	0.420368	FWM_M16	0.690897
C10orf128	HIP_M19	0.585767	TCx_M19	0.71216	PCx_M19	0.744316	FWM_M16	0.945584
C10orf2	HIP_M00	0.388544	TCx_M00	0.312702	PCx_M00	0.308853	FWM_M00	0.219932
C10orf32	HIP_M10	0.768578	TCx_M08	0.662775	PCx_M09	0.689788	FWM_M00	0.219262
C10orf35	HIP_M02	0.705412	TCx_M04	0.616684	PCx_M03	0.451297	FWM_M01	0.896525
C10orf54	HIP_M16	0.600366	TCx_M17	0.689709	PCx_M17	0.763146	FWM_M14	0.419558
C10orf76	HIP_M00	0.198303	TCx_M00	0.199378	PCx_M00	0.334634	FWM_M00	0.2096
C10orf88	HIP_M10	0.692815	TCx_M08	0.579233	PCx_M09	0.424741	FWM_M00	0.383341
C10orf90	HIP_M19	0.889574	TCx_M19	0.934196	PCx_M19	0.941302	FWM_M16	0.929815
C11orf1	HIP_M06	0.554894	TCx_M00	0.388858	PCx_M16	0.441403	FWM_M00	0.228775
C11orf24	HIP_M18	0.420358	TCx_M15	0.438991	PCx_M19	0.563893	FWM_M15	0.726656
C11orf30	HIP_M09	0.733264	TCx_M07	0.792362	PCx_M07	0.714355	FWM_M16	0.658036
C11orf31	HIP_M14	0.621455	TCx_M02	0.641998	PCx_M14	0.610089	FWM_M09	0.714521
C11orf39	HIP_M19	0.573537	TCx_M19	0.634369	PCx_M19	0.797853	FWM_M16	0.876387
C11orf42	HIP_M12	0.573655	TCx_M10	0.474206	PCx_M11	0.524682	FWM_M01	0.645883
C11orf49	HIP_M02	0.470364	TCx_M00	0.386866	PCx_M14	0.465838	FWM_M01	0.736279
C11orf54	HIP_M19	0.43334	TCx_M00	0.23634	PCx_M19	0.514415	FWM_M15	0.73899
C11orf57	HIP_M05	0.433538	TCx_M04	0.545681	PCx_M00	0.252612	FWM_M00	0.13144
C11orf58	HIP_M10	0.803051	TCx_M08	0.696256	PCx_M09	0.803571	FWM_M15	0.554769
C11orf63	HIP_M17	0.443596	TCx_M00	0.231212	PCx_M08	0.486157	FWM_M01	0.696872
C11orf65	HIP_M19	0.495662	TCx_M00	0.313959	PCx_M19	0.409591	FWM_M15	0.71765
C11orf68	HIP_M14	0.565684	TCx_M13	0.535042	PCx_M14	0.564336	FWM_M09	0.813224
C11orf70	HIP_M17	0.770884	TCx_M00	0.264676	PCx_M00	0.239014	FWM_M00	0.350942
C11orf71	HIP_M19	0.456156	TCx_M00	0.311738	PCx_M19	0.641062	FWM_M15	0.816679
C11orf72	HIP_M00	0.270252	TCx_M00	0.369677	PCx_M00	0.224418	FWM_M00	0.3843
C11orf73	HIP_M05	0.580583	TCx_M04	0.485174	PCx_M00	0.337843	FWM_M02	0.447143
C11orf74	HIP_M00	0.338026	TCx_M04	0.541421	PCx_M00	0.284684	FWM_M01	0.719743
C11orf80	HIP_M00	0.29428	TCx_M00	0.314679	PCx_M00	0.378465	FWM_M01	0.902237
C11orf84	HIP_M12	0.818344	TCx_M10	0.704066	PCx_M11	0.785767	FWM_M06	0.698356
C11orf87	HIP_M02	0.744956	TCx_M01	0.792101	PCx_M03	0.768477	FWM_M01	0.953642
C11orf88	HIP_M17	0.817574	TCx_M00	0.215465	PCx_M00	0.176938	FWM_M00	0.328926
C11orf95	HIP_M04	0.526791	TCx_M13	0.418346	PCx_M14	0.463909	FWM_M01	0.90878
C11orf96	HIP_M18	0.6988	TCx_M18	0.603731	PCx_M18	0.733266	FWM_M13	0.762522
C11orf98	HIP_M00	0.299961	TCx_M00	0.399717	PCx_M04	0.581447	FWM_M02	0.502332
C12orf10	HIP_M06	0.457306	TCx_M02	0.630103	PCx_M14	0.657992	FWM_M09	0.78018
C12orf29	HIP_M10	0.916141	TCx_M08	0.870555	PCx_M09	0.78938	FWM_M00	0.231159
C12orf4	HIP_M02	0.483717	TCx_M04	0.507637	PCx_M00	0.249332	FWM_M01	0.694938
C12orf43	HIP_M02	0.565179	TCx_M02	0.489252	PCx_M00	0.334087	FWM_M01	0.865891
C12orf45	HIP_M02	0.681234	TCx_M04	0.459877	PCx_M00	0.371627	FWM_M00	0.326489
C12orf49	HIP_M05	0.499151	TCx_M03	0.53235	PCx_M15	0.474229	FWM_M01	0.448289
C12orf5	HIP_M05	0.594515	TCx_M10	0.502062	PCx_M11	0.628047	FWM_M01	0.579849
C12orf50	HIP_M09	0.654286	TCx_M07	0.579625	PCx_M08	0.683999	FWM_M04	0.458405
C12orf57	HIP_M14	0.775115	TCx_M13	0.816973	PCx_M14	0.787369	FWM_M08	0.788034
C12orf60	HIP_M10	0.549384	TCx_M08	0.462779	PCx_M09	0.529109	FWM_M16	0.433012
C12orf65	HIP_M08	0.50624	TCx_M06	0.411917	PCx_M01	0.589395	FWM_M00	0.30752
C12orf66	HIP_M00	0.3172	TCx_M00	0.343336	PCx_M16	0.408505	FWM_M15	0.815623
C12orf73	HIP_M06	0.421097	TCx_M00	0.363382	PCx_M00	0.324211	FWM_M00	0.190461
C12orf75	HIP_M03	0.41045	TCx_M00	0.261546	PCx_M00	0.344029	FWM_M17	0.50814
C12orf76	HIP_M10	0.565739	TCx_M08	0.616864	PCx_M00	0.374308	FWM_M15	0.751556
C14orf1	HIP_M02	0.480773	TCx_M00	0.347201	PCx_M00	0.22231	FWM_M00	0.198125
C14orf105	HIP_M00	0.224443	TCx_M00	0.27301	PCx_M00	0.379485	FWM_M15	0.576268
C14orf119	HIP_M05	0.48061	TCx_M00	0.354942	PCx_M00	0.264243	FWM_M02	0.476516
C14orf132	HIP_M04	0.719764	TCx_M03	0.498069	PCx_M03	0.479268	FWM_M01	0.619306
C14orf142	HIP_M00	0.372185	TCx_M08	0.449895	PCx_M00	0.217535	FWM_M01	0.573367
C14orf159	HIP_M15	0.60183	TCx_M00	0.256097	PCx_M00	0.231738	FWM_M00	0.325347
C14orf166	HIP_M06	0.461594	TCx_M04	0.607398	PCx_M04	0.65223	FWM_M02	0.662131
C14orf169	HIP_M00	0.235216	TCx_M00	0.20543	PCx_M00	0.226147	FWM_M00	0.364452
C14orf2	HIP_M02	0.67974	TCx_M01	0.677222	PCx_M04	0.560113	FWM_M01	0.751641
C14orf28	HIP_M10	0.444416	TCx_M15	0.60305	PCx_M16	0.741964	FWM_M15	0.467604
C14orf37	HIP_M06	0.438905	TCx_M15	0.505622	PCx_M16	0.522315	FWM_M01	0.813178
C14orf79	HIP_M06	0.521355	TCx_M15	0.498687	PCx_M16	0.477733	FWM_M01	0.684164
C14orf80	HIP_M14	0.733019	TCx_M13	0.78955	PCx_M14	0.78318	FWM_M08	0.799682
C14orf93	HIP_M19	0.443778	TCx_M00	0.380947	PCx_M00	0.387006	FWM_M16	0.766146
C15orf27	HIP_M01	0.495138	TCx_M02	0.590782	PCx_M14	0.449146	FWM_M01	0.880971
C15orf38-AP3S2	HIP_M00	0.359136	TCx_M13	0.45097	PCx_M00	0.370424	FWM_M08	0.490494
C15orf40	HIP_M00	0.285053	TCx_M00	0.333977	PCx_M00	0.32844	FWM_M15	0.530525
C15orf41	HIP_M19	0.405038	TCx_M00	0.185132	PCx_M00	0.177384	FWM_M16	0.687485
C15orf52	HIP_M16	0.443904	TCx_M19	0.511003	PCx_M19	0.525652	FWM_M15	0.782548
C15orf57	HIP_M02	0.417715	TCx_M00	0.352555	PCx_M00	0.313547	FWM_M00	0.0717391
C15orf59	HIP_M00	0.358374	TCx_M13	0.45256	PCx_M11	0.567382	FWM_M01	0.867066
C15orf61	HIP_M05	0.476659	TCx_M03	0.509982	PCx_M00	0.378639	FWM_M01	0.717349
C15orf62	HIP_M16	0.459535	TCx_M00	0.337698	PCx_M00	0.31084	FWM_M00	0.382663
C15orf65	HIP_M00	0.301093	TCx_M00	0.257841	PCx_M00	0.292655	FWM_M01	0.573975
C16orf13	HIP_M14	0.705575	TCx_M13	0.77662	PCx_M14	0.673568	FWM_M09	0.855937
C16orf45	HIP_M02	0.848733	TCx_M03	0.785415	PCx_M03	0.669599	FWM_M01	0.926968
C16orf46	HIP_M04	0.552438	TCx_M00	0.325613	PCx_M11	0.450463	FWM_M00	0.387624
C16orf52	HIP_M10	0.851013	TCx_M08	0.847397	PCx_M09	0.658173	FWM_M01	0.81675
C16orf58	HIP_M06	0.633929	TCx_M15	0.708559	PCx_M16	0.634113	FWM_M09	0.453774
C16orf62	HIP_M19	0.506886	TCx_M19	0.40238	PCx_M19	0.653756	FWM_M15	0.896268
C16orf70	HIP_M02	0.645564	TCx_M01	0.532132	PCx_M00	0.330348	FWM_M00	0.274065
C16orf72	HIP_M10	0.724221	TCx_M08	0.761412	PCx_M09	0.671572	FWM_M01	0.485844
C16orf74	HIP_M00	0.379987	TCx_M00	0.399081	PCx_M00	0.320914	FWM_M00	0.211118
C16orf87	HIP_M10	0.666905	TCx_M08	0.68893	PCx_M09	0.549939	FWM_M01	0.705801
C16orf89	HIP_M15	0.425083	TCx_M17	0.453283	PCx_M16	0.443552	FWM_M00	0.1567
C16orf91	HIP_M14	0.405024	TCx_M04	0.446944	PCx_M14	0.407144	FWM_M09	0.668406
C16orf93	HIP_M14	0.434913	TCx_M02	0.4657	PCx_M14	0.582219	FWM_M01	0.795764
C17orf100	HIP_M00	0.183017	TCx_M00	0.272167	PCx_M00	0.387576	FWM_M00	0.389105
C17orf102	HIP_M06	0.515027	TCx_M15	0.621969	PCx_M16	0.556296	FWM_M01	0.729488
C17orf104	HIP_M10	0.760206	TCx_M08	0.664534	PCx_M09	0.556369	FWM_M01	0.596237
C17orf107	HIP_M14	0.478716	TCx_M02	0.509808	PCx_M14	0.539553	FWM_M01	0.810999
C17orf49	HIP_M06	0.55873	TCx_M15	0.517495	PCx_M16	0.459602	FWM_M00	0.317727
C17orf51	HIP_M02	0.69198	TCx_M03	0.529231	PCx_M03	0.655286	FWM_M01	0.935903
C17orf58	HIP_M06	0.558736	TCx_M04	0.661085	PCx_M16	0.565498	FWM_M00	0.356828
C17orf59	HIP_M14	0.774511	TCx_M13	0.702961	PCx_M14	0.776397	FWM_M08	0.72231
C17orf62	HIP_M14	0.635695	TCx_M13	0.575357	PCx_M04	0.553993	FWM_M12	0.814426
C17orf67	HIP_M12	0.846488	TCx_M10	0.748823	PCx_M11	0.686935	FWM_M06	0.885694
C17orf70	HIP_M14	0.827782	TCx_M13	0.867433	PCx_M14	0.791266	FWM_M08	0.788334
C17orf75	HIP_M10	0.439575	TCx_M04	0.71103	PCx_M00	0.285943	FWM_M01	0.49923
C17orf80	HIP_M00	0.244913	TCx_M00	0.302898	PCx_M00	0.288686	FWM_M01	0.42818
C17orf85	HIP_M19	0.762321	TCx_M19	0.514708	PCx_M19	0.572584	FWM_M15	0.860923
C17orf89	HIP_M00	0.33149	TCx_M00	0.383992	PCx_M04	0.436241	FWM_M02	0.468334
C17orf96	HIP_M00	0.369291	TCx_M00	0.360923	PCx_M15	0.431668	FWM_M01	0.871245
C17orf97	HIP_M00	0.333334	TCx_M00	0.254377	PCx_M00	0.214647	FWM_M01	0.689767
C18orf21	HIP_M05	0.521476	TCx_M00	0.339828	PCx_M00	0.380304	FWM_M00	0.275181
C18orf25	HIP_M05	0.683405	TCx_M03	0.699855	PCx_M03	0.559623	FWM_M01	0.79808
C18orf32	HIP_M10	0.75137	TCx_M08	0.593854	PCx_M16	0.656162	FWM_M15	0.758603
C18orf42	HIP_M02	0.559125	TCx_M04	0.624638	PCx_M03	0.449099	FWM_M01	0.76356
C18orf54	HIP_M19	0.573818	TCx_M00	0.386573	PCx_M19	0.554238	FWM_M16	0.844644
C18orf8	HIP_M00	0.342074	TCx_M04	0.42003	PCx_M00	0.252763	FWM_M00	0.263351
C19orf12	HIP_M02	0.606462	TCx_M03	0.514257	PCx_M03	0.574381	FWM_M01	0.904927
C19orf24	HIP_M14	0.766739	TCx_M13	0.746694	PCx_M14	0.657405	FWM_M10	0.770214
C19orf25	HIP_M14	0.909674	TCx_M13	0.855486	PCx_M14	0.779762	FWM_M08	0.867132
C19orf26	HIP_M14	0.805908	TCx_M13	0.789844	PCx_M14	0.79483	FWM_M09	0.803239
C19orf43	HIP_M00	0.371702	TCx_M04	0.460757	PCx_M00	0.397981	FWM_M08	0.406441
C19orf44	HIP_M00	0.368912	TCx_M00	0.322293	PCx_M00	0.236488	FWM_M00	0.359446
C19orf47	HIP_M14	0.666562	TCx_M13	0.747604	PCx_M14	0.722455	FWM_M10	0.699921
C19orf48	HIP_M15	0.588788	TCx_M15	0.52463	PCx_M04	0.632115	FWM_M10	0.699185
C19orf52	HIP_M14	0.48293	TCx_M13	0.418007	PCx_M14	0.517221	FWM_M08	0.542608
C19orf53	HIP_M14	0.461103	TCx_M00	0.357945	PCx_M04	0.444297	FWM_M10	0.478677
C19orf54	HIP_M00	0.392314	TCx_M00	0.26168	PCx_M00	0.285547	FWM_M16	0.648976
C19orf60	HIP_M14	0.862078	TCx_M13	0.813234	PCx_M14	0.771799	FWM_M08	0.843245
C19orf66	HIP_M00	0.343554	TCx_M02	0.437088	PCx_M00	0.341273	FWM_M01	0.712518
C19orf70	HIP_M14	0.704662	TCx_M13	0.772381	PCx_M14	0.665049	FWM_M08	0.806277
C19orf71	HIP_M14	0.609276	TCx_M13	0.694476	PCx_M14	0.502526	FWM_M10	0.587243
C1D	HIP_M10	0.869443	TCx_M08	0.797889	PCx_M09	0.814542	FWM_M00	0.262293
C1GALT1	HIP_M10	0.631379	TCx_M08	0.566051	PCx_M09	0.73515	FWM_M15	0.825298
C1GALT1C1	HIP_M10	0.518184	TCx_M00	0.298074	PCx_M00	0.339845	FWM_M15	0.538974
C1orf101	HIP_M06	0.446775	TCx_M15	0.479892	PCx_M16	0.449918	FWM_M02	0.516804
C1orf109	HIP_M10	0.495271	TCx_M04	0.597117	PCx_M00	0.393179	FWM_M01	0.566163
C1orf111	HIP_M12	0.504228	TCx_M10	0.483228	PCx_M00	0.323692	FWM_M00	0.392367
C1orf112	HIP_M19	0.412291	TCx_M00	0.363608	PCx_M00	0.367827	FWM_M16	0.788787
C1orf115	HIP_M05	0.561057	TCx_M03	0.81087	PCx_M03	0.774227	FWM_M01	0.948294
C1orf122	HIP_M14	0.611453	TCx_M13	0.547212	PCx_M14	0.555217	FWM_M10	0.764526
C1orf123	HIP_M06	0.576877	TCx_M15	0.495818	PCx_M16	0.586794	FWM_M15	0.507336
C1orf131	HIP_M00	0.387263	TCx_M04	0.416412	PCx_M00	0.397378	FWM_M15	0.439734
C1orf132	HIP_M12	0.820335	TCx_M10	0.776323	PCx_M11	0.856239	FWM_M06	0.594498
C1orf159	HIP_M14	0.716226	TCx_M13	0.626942	PCx_M14	0.618845	FWM_M08	0.630278
C1orf162	HIP_M20	0.784906	TCx_M18	0.66121	PCx_M20	0.720208	FWM_M14	0.801821
C1orf174	HIP_M00	0.252005	TCx_M00	0.268308	PCx_M00	0.199028	FWM_M02	0.416272
C1orf194	HIP_M17	0.62384	TCx_M00	0.355767	PCx_M00	0.326264	FWM_M00	0.29694
C1orf198	HIP_M18	0.594461	TCx_M19	0.7668	PCx_M19	0.771225	FWM_M15	0.929643
C1orf204	HIP_M00	0.233724	TCx_M00	0.278307	PCx_M00	0.307512	FWM_M00	0.315692
C1orf21	HIP_M04	0.719778	TCx_M03	0.665746	PCx_M03	0.70278	FWM_M01	0.931487
C1orf210	HIP_M00	0.146721	TCx_M00	0.192715	PCx_M00	0.218051	FWM_M00	0.222818
C1orf216	HIP_M02	0.753395	TCx_M03	0.716132	PCx_M03	0.691482	FWM_M01	0.890096
C1orf220	HIP_M00	0.263723	TCx_M00	0.313777	PCx_M00	0.345021	FWM_M01	0.507431
C1orf226	HIP_M12	0.522387	TCx_M10	0.510301	PCx_M11	0.507319	FWM_M06	0.595873
C1orf228	HIP_M15	0.591402	TCx_M00	0.345736	PCx_M00	0.303516	FWM_M00	0.22038
C1orf229	HIP_M00	0.259043	TCx_M13	0.418274	PCx_M14	0.437559	FWM_M10	0.657014
C1orf233	HIP_M14	0.765192	TCx_M13	0.780265	PCx_M14	0.721068	FWM_M01	0.828584
C1orf27	HIP_M06	0.522952	TCx_M15	0.622109	PCx_M16	0.735987	FWM_M15	0.731448
C1orf35	HIP_M14	0.630699	TCx_M13	0.600165	PCx_M14	0.663672	FWM_M08	0.692754
C1orf43	HIP_M12	0.406412	TCx_M04	0.528992	PCx_M04	0.409801	FWM_M02	0.683236
C1orf50	HIP_M06	0.465986	TCx_M04	0.409885	PCx_M16	0.42908	FWM_M02	0.465713
C1orf52	HIP_M05	0.84337	TCx_M08	0.602845	PCx_M11	0.530537	FWM_M01	0.492254
C1orf54	HIP_M06	0.429379	TCx_M15	0.473665	PCx_M00	0.378077	FWM_M17	0.433203
C1orf56	HIP_M16	0.415216	TCx_M00	0.260645	PCx_M11	0.422775	FWM_M12	0.702955
C1orf61	HIP_M15	0.591857	TCx_M15	0.735301	PCx_M16	0.721281	FWM_M00	0.257115
C1orf64	HIP_M16	0.519708	TCx_M16	0.568866	PCx_M18	0.460847	FWM_M13	0.40154
C1orf74	HIP_M06	0.515611	TCx_M04	0.423376	PCx_M16	0.533857	FWM_M00	0.178212
C1orf86	HIP_M14	0.708891	TCx_M13	0.63727	PCx_M14	0.613827	FWM_M08	0.405361
C1orf87	HIP_M17	0.841816	TCx_M18	0.599453	PCx_M20	0.527723	FWM_M13	0.493743
C1orf95	HIP_M02	0.447521	TCx_M00	0.325709	PCx_M00	0.273265	FWM_M01	0.660774
C1QA	HIP_M20	0.795554	TCx_M18	0.809869	PCx_M20	0.86404	FWM_M14	0.895236
C1QB	HIP_M20	0.822512	TCx_M18	0.839197	PCx_M20	0.890311	FWM_M14	0.933583
C1QBP	HIP_M06	0.581295	TCx_M04	0.720384	PCx_M04	0.63727	FWM_M00	0.201066
C1QC	HIP_M20	0.835959	TCx_M18	0.812069	PCx_M20	0.87694	FWM_M14	0.938666
C1QL1	HIP_M14	0.64457	TCx_M13	0.670601	PCx_M14	0.583916	FWM_M08	0.670433
C1QL2	HIP_M00	0.308873	TCx_M13	0.42213	PCx_M14	0.549913	FWM_M09	0.513282
C1QL3	HIP_M05	0.693779	TCx_M01	0.588817	PCx_M03	0.703744	FWM_M01	0.949867
C1QTNF1	HIP_M15	0.422381	TCx_M18	0.449728	PCx_M13	0.540697	FWM_M07	0.434075
C1QTNF3	HIP_M19	0.426609	TCx_M19	0.555081	PCx_M19	0.605324	FWM_M15	0.908259
C1QTNF3-AMACR	HIP_M00	0.328996	TCx_M00	0.256999	PCx_M00	0.225268	FWM_M16	0.446279
C1QTNF4	HIP_M14	0.893298	TCx_M13	0.888535	PCx_M14	0.912823	FWM_M09	0.852392
C1QTNF5	HIP_M15	0.586531	TCx_M16	0.521344	PCx_M00	0.394792	FWM_M12	0.736005
C1QTNF6	HIP_M16	0.408198	TCx_M10	0.542498	PCx_M00	0.372101	FWM_M16	0.714694
C1QTNF9B	HIP_M01	0.68031	TCx_M00	0.259853	PCx_M00	0.328002	FWM_M00	0.134398
C1R	HIP_M18	0.818496	TCx_M18	0.870944	PCx_M18	0.766837	FWM_M13	0.78082
C1RL	HIP_M18	0.597894	TCx_M18	0.619969	PCx_M18	0.562307	FWM_M13	0.567672
C1S	HIP_M18	0.767741	TCx_M18	0.744839	PCx_M20	0.618803	FWM_M13	0.644825
C2	HIP_M18	0.575765	TCx_M18	0.562383	PCx_M20	0.541955	FWM_M14	0.576054
C20orf194	HIP_M00	0.256142	TCx_M00	0.365556	PCx_M16	0.482975	FWM_M15	0.516781
C20orf196	HIP_M00	0.255197	TCx_M00	0.219984	PCx_M00	0.262483	FWM_M00	0.334538
C20orf203	HIP_M00	0.227063	TCx_M00	0.396288	PCx_M00	0.27905	FWM_M01	0.645636
C20orf24	HIP_M05	0.549651	TCx_M04	0.430789	PCx_M00	0.302291	FWM_M00	0.23804
C20orf27	HIP_M14	0.752156	TCx_M13	0.761863	PCx_M14	0.759648	FWM_M09	0.745739
C20orf96	HIP_M09	0.417174	TCx_M00	0.359237	PCx_M11	0.456737	FWM_M01	0.435168
C21orf2	HIP_M14	0.827814	TCx_M13	0.823459	PCx_M14	0.821832	FWM_M08	0.767271
C21orf33	HIP_M00	0.12056	TCx_M00	0.143821	PCx_M00	0.165109	FWM_M00	0.202227
C21orf59	HIP_M06	0.484582	TCx_M01	0.455049	PCx_M04	0.461586	FWM_M01	0.586426
C21orf62	HIP_M16	0.539557	TCx_M00	0.386196	PCx_M01	0.554611	FWM_M16	0.787078
C21orf62-AS1	HIP_M00	0.347208	TCx_M00	0.331133	PCx_M00	0.349792	FWM_M16	0.790915
C21orf91	HIP_M19	0.640103	TCx_M19	0.803551	PCx_M19	0.885104	FWM_M16	0.900587
C22orf23	HIP_M19	0.444012	TCx_M19	0.737583	PCx_M19	0.823644	FWM_M15	0.904273
C22orf24	HIP_M01	0.69789	TCx_M00	0.277166	PCx_M11	0.453275	FWM_M01	0.797561
C22orf29	HIP_M01	0.548963	TCx_M00	0.239811	PCx_M00	0.292935	FWM_M01	0.858008
C22orf39	HIP_M02	0.414105	TCx_M04	0.478936	PCx_M00	0.375418	FWM_M01	0.706006
C22orf46	HIP_M09	0.668737	TCx_M07	0.677513	PCx_M07	0.644522	FWM_M04	0.653072
C2CD2	HIP_M16	0.480399	TCx_M00	0.345725	PCx_M00	0.369142	FWM_M00	0.284441
C2CD2L	HIP_M02	0.479256	TCx_M02	0.72687	PCx_M14	0.677757	FWM_M01	0.908794
C2CD3	HIP_M00	0.328427	TCx_M00	0.346185	PCx_M00	0.36536	FWM_M06	0.402748
C2CD4C	HIP_M14	0.472205	TCx_M13	0.727781	PCx_M14	0.816725	FWM_M09	0.877576
C2CD5	HIP_M10	0.583064	TCx_M01	0.746607	PCx_M03	0.470095	FWM_M01	0.883844
C2orf15	HIP_M00	0.182001	TCx_M00	0.138963	PCx_M00	0.173163	FWM_M00	0.284062
C2orf40	HIP_M00	0.399095	TCx_M00	0.39592	PCx_M00	0.236593	FWM_M00	0.398137
C2orf42	HIP_M05	0.522644	TCx_M10	0.50315	PCx_M11	0.443507	FWM_M06	0.657995
C2orf43	HIP_M00	0.313958	TCx_M00	0.360701	PCx_M00	0.311039	FWM_M00	0.374975
C2orf44	HIP_M12	0.594825	TCx_M10	0.561311	PCx_M11	0.471155	FWM_M00	0.312136
C2orf47	HIP_M00	0.331544	TCx_M02	0.438115	PCx_M00	0.22704	FWM_M00	0.377424
C2orf49	HIP_M00	0.207943	TCx_M00	0.230342	PCx_M00	0.229906	FWM_M15	0.704204
C2orf50	HIP_M00	0.254584	TCx_M00	0.216786	PCx_M00	0.359413	FWM_M01	0.791404
C2orf68	HIP_M19	0.692749	TCx_M19	0.566232	PCx_M19	0.567173	FWM_M15	0.880492
C2orf69	HIP_M10	0.895	TCx_M08	0.900788	PCx_M09	0.874593	FWM_M00	0.265758
C2orf72	HIP_M00	0.254748	TCx_M00	0.256424	PCx_M00	0.28817	FWM_M01	0.558073
C2orf74	HIP_M00	0.300005	TCx_M00	0.232846	PCx_M00	0.318408	FWM_M00	0.369724
C2orf76	HIP_M00	0.351898	TCx_M00	0.305411	PCx_M16	0.443651	FWM_M15	0.783012
C2orf80	HIP_M02	0.678817	TCx_M01	0.776439	PCx_M03	0.671408	FWM_M01	0.92048
C2orf82	HIP_M14	0.496968	TCx_M00	0.372608	PCx_M00	0.313476	FWM_M10	0.637443
C2orf83	HIP_M00	0.289502	TCx_M00	0.228324	PCx_M00	0.397144	FWM_M00	0.347587
C2orf88	HIP_M17	0.413009	TCx_M10	0.745165	PCx_M11	0.545375	FWM_M16	0.870443
C2orf91	HIP_M09	0.592099	TCx_M07	0.589569	PCx_M08	0.655647	FWM_M00	0.389118
C3	HIP_M20	0.813988	TCx_M20	0.904851	PCx_M20	0.852377	FWM_M17	0.887028
C3AR1	HIP_M20	0.803206	TCx_M20	0.728511	PCx_M20	0.718965	FWM_M17	0.900951
C3orf14	HIP_M05	0.665826	TCx_M08	0.682337	PCx_M03	0.553113	FWM_M01	0.815862
C3orf17	HIP_M06	0.671323	TCx_M15	0.648158	PCx_M16	0.739063	FWM_M15	0.596529
C3orf18	HIP_M15	0.518386	TCx_M04	0.609071	PCx_M00	0.373134	FWM_M01	0.721098
C3orf33	HIP_M00	0.396738	TCx_M00	0.363597	PCx_M09	0.511305	FWM_M00	0.0760808
C3orf35	HIP_M00	0.189895	TCx_M00	0.174094	PCx_M00	0.0922872	FWM_M01	0.517184
C3orf38	HIP_M10	0.719585	TCx_M08	0.552415	PCx_M09	0.643804	FWM_M15	0.606583
C3orf58	HIP_M19	0.584658	TCx_M08	0.693241	PCx_M09	0.819852	FWM_M15	0.590294
C3orf62	HIP_M12	0.453723	TCx_M10	0.594804	PCx_M11	0.744235	FWM_M06	0.424279
C3orf70	HIP_M10	0.413948	TCx_M15	0.511338	PCx_M17	0.752241	FWM_M00	0.382521
C3orf80	HIP_M03	0.691737	TCx_M08	0.765815	PCx_M03	0.611266	FWM_M01	0.910845
C4A	HIP_M18	0.445772	TCx_M18	0.58713	PCx_M18	0.503904	FWM_M02	0.549726
C4B	HIP_M16	0.674347	TCx_M18	0.730554	PCx_M20	0.622663	FWM_M12	0.594219
C4BPB	HIP_M00	0.299175	TCx_M00	0.332984	PCx_M01	0.625532	FWM_M00	0.142874
C4orf19	HIP_M00	0.153382	TCx_M17	0.489443	PCx_M17	0.539301	FWM_M00	0.324123
C4orf22	HIP_M17	0.621701	TCx_M00	0.234203	PCx_M00	0.214899	FWM_M00	0.204236
C4orf26	HIP_M00	0.278718	TCx_M00	0.393092	PCx_M01	0.686432	FWM_M00	0.248218
C4orf27	HIP_M06	0.569135	TCx_M04	0.628969	PCx_M16	0.520841	FWM_M00	0.394337
C4orf29	HIP_M06	0.478842	TCx_M15	0.613894	PCx_M16	0.603401	FWM_M00	0.384156
C4orf3	HIP_M10	0.692473	TCx_M08	0.584081	PCx_M09	0.651916	FWM_M02	0.63174
C4orf32	HIP_M10	0.668115	TCx_M08	0.465781	PCx_M09	0.691712	FWM_M15	0.697886
C4orf33	HIP_M06	0.60553	TCx_M04	0.493834	PCx_M00	0.285505	FWM_M00	0.243059
C4orf46	HIP_M10	0.564349	TCx_M00	0.366985	PCx_M19	0.416414	FWM_M15	0.703704
C4orf47	HIP_M17	0.625234	TCx_M10	0.498981	PCx_M11	0.666823	FWM_M06	0.430359
C4orf48	HIP_M14	0.832294	TCx_M13	0.779795	PCx_M14	0.776214	FWM_M08	0.845897
C4orf50	HIP_M05	0.475027	TCx_M01	0.480165	PCx_M03	0.549629	FWM_M01	0.959017
C5	HIP_M15	0.757813	TCx_M15	0.608624	PCx_M16	0.78552	FWM_M15	0.850621
C5AR1	HIP_M18	0.645909	TCx_M18	0.542554	PCx_M18	0.745793	FWM_M11	0.78552
C5orf15	HIP_M10	0.741042	TCx_M08	0.637399	PCx_M09	0.776083	FWM_M15	0.745892
C5orf22	HIP_M10	0.643888	TCx_M04	0.583725	PCx_M09	0.416914	FWM_M01	0.742767
C5orf24	HIP_M10	0.865494	TCx_M08	0.805429	PCx_M09	0.863186	FWM_M00	0.223127
C5orf28	HIP_M10	0.66696	TCx_M08	0.729563	PCx_M09	0.748728	FWM_M00	0.260791
C5orf30	HIP_M10	0.784757	TCx_M08	0.816859	PCx_M09	0.775191	FWM_M00	0.281153
C5orf34	HIP_M06	0.435345	TCx_M00	0.364528	PCx_M16	0.437075	FWM_M01	0.445271
C5orf42	HIP_M10	0.442093	TCx_M15	0.510682	PCx_M16	0.592811	FWM_M01	0.536053
C5orf45	HIP_M15	0.407621	TCx_M00	0.339287	PCx_M00	0.396292	FWM_M09	0.507391
C5orf49	HIP_M17	0.599178	TCx_M00	0.280299	PCx_M00	0.280602	FWM_M01	0.717382
C5orf51	HIP_M10	0.42907	TCx_M00	0.356289	PCx_M09	0.603069	FWM_M16	0.761523
C5orf56	HIP_M00	0.284852	TCx_M00	0.386156	PCx_M00	0.224742	FWM_M02	0.543222
C5orf63	HIP_M17	0.54782	TCx_M00	0.314795	PCx_M00	0.393275	FWM_M00	0.300624
C5orf64	HIP_M19	0.720485	TCx_M19	0.679067	PCx_M19	0.765311	FWM_M15	0.887718
C5orf66	HIP_M00	0.254648	TCx_M00	0.29291	PCx_M00	0.343919	FWM_M15	0.520079
C6orf1	HIP_M14	0.512758	TCx_M13	0.506253	PCx_M14	0.60167	FWM_M08	0.574104
C6orf106	HIP_M05	0.616832	TCx_M03	0.568082	PCx_M03	0.588228	FWM_M01	0.903507
C6orf118	HIP_M17	0.509525	TCx_M17	0.496315	PCx_M00	0.258128	FWM_M00	0.253612
C6orf120	HIP_M10	0.689108	TCx_M04	0.610549	PCx_M09	0.540847	FWM_M00	0.176421
C6orf136	HIP_M00	0.399936	TCx_M03	0.497927	PCx_M03	0.400246	FWM_M01	0.759972
C6orf163	HIP_M00	0.276576	TCx_M00	0.334223	PCx_M00	0.302685	FWM_M01	0.403786
C6orf165	HIP_M17	0.591879	TCx_M00	0.236167	PCx_M00	0.310684	FWM_M01	0.792881
C6orf203	HIP_M10	0.527828	TCx_M00	0.355519	PCx_M00	0.322261	FWM_M01	0.457698
C6orf226	HIP_M14	0.48987	TCx_M13	0.597318	PCx_M14	0.467941	FWM_M10	0.639341
C6orf47	HIP_M20	0.532186	TCx_M00	0.228116	PCx_M04	0.410767	FWM_M15	0.533021
C6orf48	HIP_M15	0.549441	TCx_M15	0.488129	PCx_M16	0.66553	FWM_M02	0.884297
C6orf62	HIP_M10	0.685648	TCx_M08	0.586522	PCx_M09	0.709573	FWM_M15	0.417534
C6orf89	HIP_M06	0.56474	TCx_M04	0.431879	PCx_M16	0.4638	FWM_M00	0.331412
C7	HIP_M18	0.41941	TCx_M18	0.59304	PCx_M20	0.592068	FWM_M07	0.642727
C7orf13	HIP_M05	0.526513	TCx_M00	0.371178	PCx_M00	0.303438	FWM_M00	0.391337
C7orf25	HIP_M05	0.485061	TCx_M00	0.228157	PCx_M00	0.190858	FWM_M00	0.0779346
C7orf26	HIP_M14	0.449819	TCx_M13	0.509686	PCx_M14	0.460774	FWM_M10	0.601625
C7orf43	HIP_M14	0.472211	TCx_M13	0.642312	PCx_M14	0.451954	FWM_M01	0.73419
C7orf49	HIP_M16	0.590215	TCx_M19	0.499464	PCx_M19	0.600619	FWM_M16	0.88293
C7orf50	HIP_M14	0.722337	TCx_M13	0.74953	PCx_M14	0.657273	FWM_M08	0.759805
C7orf55	HIP_M00	0.354594	TCx_M00	0.314817	PCx_M01	0.485618	FWM_M15	0.65427
C7orf55-LUC7L2	HIP_M14	0.424612	TCx_M13	0.489821	PCx_M00	0.349622	FWM_M10	0.496499
C7orf60	HIP_M05	0.799215	TCx_M10	0.693929	PCx_M11	0.649061	FWM_M01	0.720298
C7orf61	HIP_M12	0.841436	TCx_M10	0.75723	PCx_M11	0.746157	FWM_M06	0.804131
C7orf73	HIP_M10	0.526481	TCx_M08	0.455502	PCx_M09	0.708109	FWM_M15	0.534332
C8orf33	HIP_M15	0.708205	TCx_M15	0.663954	PCx_M16	0.743201	FWM_M00	0.329107
C8orf34	HIP_M01	0.513163	TCx_M00	0.318719	PCx_M00	0.351491	FWM_M01	0.447206
C8orf37	HIP_M15	0.591939	TCx_M00	0.391496	PCx_M16	0.478768	FWM_M15	0.440879
C8orf4	HIP_M06	0.422365	TCx_M15	0.443757	PCx_M00	0.398608	FWM_M00	0.396083
C8orf44	HIP_M00	0.23722	TCx_M00	0.351018	PCx_M00	0.328223	FWM_M00	0.20538
C8orf44-SGK3	HIP_M00	0.246789	TCx_M00	0.201054	PCx_M00	0.148488	FWM_M06	0.465918
C8orf46	HIP_M04	0.852087	TCx_M08	0.741692	PCx_M09	0.401548	FWM_M15	0.508625
C8orf48	HIP_M00	0.326612	TCx_M16	0.416862	PCx_M00	0.239774	FWM_M00	0.3922
C8orf58	HIP_M18	0.44993	TCx_M16	0.548956	PCx_M00	0.374095	FWM_M00	0.238314
C8orf59	HIP_M06	0.48096	TCx_M04	0.498231	PCx_M04	0.513742	FWM_M02	0.466177
C8orf76	HIP_M05	0.583032	TCx_M00	0.394648	PCx_M11	0.438076	FWM_M01	0.408533
C8orf82	HIP_M14	0.666784	TCx_M13	0.755617	PCx_M14	0.633593	FWM_M10	0.728309
C8orf86	HIP_M00	0.300316	TCx_M00	0.184944	PCx_M00	0.369729	FWM_M00	0.298668
C8orf88	HIP_M00	0.303849	TCx_M00	0.378348	PCx_M20	0.417524	FWM_M16	0.641182
C9orf114	HIP_M16	0.637788	TCx_M16	0.595016	PCx_M11	0.526621	FWM_M06	0.512926
C9orf116	HIP_M00	0.318427	TCx_M00	0.134052	PCx_M00	0.188955	FWM_M01	0.628923
C9orf117	HIP_M17	0.772537	TCx_M00	0.227326	PCx_M00	0.207889	FWM_M00	0.350156
C9orf129	HIP_M14	0.487606	TCx_M02	0.582428	PCx_M00	0.371044	FWM_M01	0.7211
C9orf131	HIP_M12	0.521062	TCx_M10	0.493412	PCx_M00	0.38691	FWM_M00	0.377786
C9orf139	HIP_M19	0.45174	TCx_M19	0.509271	PCx_M00	0.316475	FWM_M12	0.768264
C9orf142	HIP_M14	0.837484	TCx_M13	0.848639	PCx_M14	0.803878	FWM_M10	0.871854
C9orf156	HIP_M15	0.589534	TCx_M15	0.464003	PCx_M16	0.622853	FWM_M15	0.613046
C9orf16	HIP_M14	0.830649	TCx_M13	0.890235	PCx_M14	0.895271	FWM_M09	0.907973
C9orf172	HIP_M14	0.851982	TCx_M13	0.820519	PCx_M14	0.867418	FWM_M09	0.731155
C9orf24	HIP_M17	0.72768	TCx_M02	0.419125	PCx_M00	0.351608	FWM_M01	0.775213
C9orf3	HIP_M00	0.300201	TCx_M19	0.494095	PCx_M19	0.567769	FWM_M15	0.874397
C9orf40	HIP_M05	0.538025	TCx_M08	0.676858	PCx_M09	0.490996	FWM_M00	0.350201
C9orf41	HIP_M10	0.683247	TCx_M08	0.650102	PCx_M03	0.43593	FWM_M01	0.468371
C9orf64	HIP_M00	0.26552	TCx_M00	0.260671	PCx_M00	0.373747	FWM_M15	0.649058
C9orf69	HIP_M14	0.803809	TCx_M13	0.838447	PCx_M14	0.79975	FWM_M09	0.841944
C9orf72	HIP_M10	0.561128	TCx_M08	0.686334	PCx_M09	0.687897	FWM_M00	0.288666
C9orf78	HIP_M00	0.260593	TCx_M04	0.523953	PCx_M04	0.412238	FWM_M02	0.65015
C9orf84	HIP_M12	0.633038	TCx_M10	0.688562	PCx_M11	0.622164	FWM_M06	0.641086
C9orf85	HIP_M00	0.346872	TCx_M00	0.315045	PCx_M16	0.469201	FWM_M15	0.848753
C9orf89	HIP_M14	0.643885	TCx_M13	0.562166	PCx_M14	0.538479	FWM_M10	0.585085
C9orf9	HIP_M15	0.463635	TCx_M00	0.345326	PCx_M00	0.326478	FWM_M00	0.285402
C9orf91	HIP_M04	0.734144	TCx_M03	0.638707	PCx_M03	0.827564	FWM_M01	0.952119
CA10	HIP_M01	0.735264	TCx_M01	0.677398	PCx_M03	0.662615	FWM_M01	0.895891
CA11	HIP_M04	0.727108	TCx_M02	0.438407	PCx_M03	0.515661	FWM_M01	0.847608
CA12	HIP_M00	0.193928	TCx_M00	0.265663	PCx_M00	0.267531	FWM_M00	0.395623
CA13	HIP_M00	0.394726	TCx_M08	0.545951	PCx_M09	0.470265	FWM_M01	0.557116
CA14	HIP_M19	0.70503	TCx_M19	0.645785	PCx_M19	0.758468	FWM_M15	0.913162
CA15P2	HIP_M00	0.358946	TCx_M00	0.296815	PCx_M00	0.234559	FWM_M00	0.274557
CA2	HIP_M12	0.435947	TCx_M19	0.531439	PCx_M19	0.49961	FWM_M16	0.748101
CA4	HIP_M06	0.466837	TCx_M00	0.301007	PCx_M00	0.37643	FWM_M01	0.786468
CA5B	HIP_M00	0.37489	TCx_M19	0.456257	PCx_M19	0.502138	FWM_M15	0.754225
CA5BP1	HIP_M12	0.447314	TCx_M16	0.407353	PCx_M11	0.440104	FWM_M06	0.409006
CA7	HIP_M04	0.611896	TCx_M02	0.510557	PCx_M11	0.58294	FWM_M01	0.928144
CA8	HIP_M00	0.250456	TCx_M00	0.340232	PCx_M00	0.33607	FWM_M00	0.367258
CAAP1	HIP_M10	0.75514	TCx_M08	0.596305	PCx_M09	0.714776	FWM_M00	0.200618
CAB39	HIP_M10	0.820604	TCx_M08	0.82873	PCx_M09	0.615748	FWM_M01	0.659098
CAB39L	HIP_M00	0.338699	TCx_M00	0.155641	PCx_M00	0.227363	FWM_M00	0.394986
CABIN1	HIP_M00	0.385666	TCx_M13	0.474856	PCx_M14	0.52611	FWM_M09	0.445461
CABLES1	HIP_M00	0.183626	TCx_M17	0.536425	PCx_M00	0.394973	FWM_M01	0.883755
CABLES2	HIP_M00	0.275709	TCx_M07	0.456465	PCx_M15	0.436008	FWM_M01	0.767414
CABP1	HIP_M04	0.784299	TCx_M02	0.823537	PCx_M03	0.685342	FWM_M01	0.936225
CABP4	HIP_M00	0.162628	TCx_M00	0.178325	PCx_M01	0.746229	FWM_M00	0.345544
CABP7	HIP_M04	0.798392	TCx_M18	0.416339	PCx_M00	0.330429	FWM_M00	0.332941
CABYR	HIP_M12	0.582462	TCx_M10	0.627632	PCx_M11	0.522398	FWM_M06	0.632498
CACFD1	HIP_M14	0.632013	TCx_M13	0.675062	PCx_M14	0.617315	FWM_M12	0.630413
CACHD1	HIP_M00	0.370412	TCx_M17	0.692237	PCx_M17	0.638892	FWM_M01	0.761931
CACNA1A	HIP_M09	0.469959	TCx_M00	0.312164	PCx_M08	0.509507	FWM_M01	0.909535
CACNA1B	HIP_M01	0.665984	TCx_M02	0.617369	PCx_M14	0.553878	FWM_M01	0.940909
CACNA1C	HIP_M01	0.684711	TCx_M02	0.410679	PCx_M00	0.322496	FWM_M01	0.956707
CACNA1C-AS4	HIP_M01	0.506388	TCx_M00	0.389057	PCx_M00	0.334862	FWM_M01	0.730899
CACNA1D	HIP_M01	0.689812	TCx_M01	0.588047	PCx_M03	0.491115	FWM_M01	0.919336
CACNA1E	HIP_M02	0.823585	TCx_M01	0.716773	PCx_M03	0.738837	FWM_M01	0.951369
CACNA1G	HIP_M03	0.440539	TCx_M13	0.645709	PCx_M14	0.707749	FWM_M01	0.924153
CACNA1H	HIP_M14	0.581623	TCx_M13	0.43103	PCx_M14	0.521311	FWM_M01	0.670466
CACNA1I	HIP_M01	0.654836	TCx_M13	0.576556	PCx_M14	0.605919	FWM_M01	0.89877
CACNA2D1	HIP_M04	0.805967	TCx_M01	0.785159	PCx_M03	0.737615	FWM_M01	0.760932
CACNA2D2	HIP_M03	0.670972	TCx_M01	0.469227	PCx_M00	0.399937	FWM_M01	0.957155
CACNA2D3	HIP_M02	0.775714	TCx_M01	0.815956	PCx_M03	0.612386	FWM_M01	0.896289
CACNA2D3-AS1	HIP_M00	0.321337	TCx_M00	0.308764	PCx_M03	0.502989	FWM_M01	0.772804
CACNB1	HIP_M02	0.621798	TCx_M02	0.772993	PCx_M03	0.481397	FWM_M01	0.939078
CACNB2	HIP_M04	0.761767	TCx_M03	0.737173	PCx_M03	0.721905	FWM_M01	0.962566
CACNB3	HIP_M00	0.387885	TCx_M02	0.693676	PCx_M14	0.61055	FWM_M01	0.935565
CACNB4	HIP_M03	0.58235	TCx_M01	0.863868	PCx_M03	0.80023	FWM_M01	0.923501
CACNG2	HIP_M01	0.774727	TCx_M07	0.469882	PCx_M03	0.679339	FWM_M01	0.965503
CACNG3	HIP_M04	0.708517	TCx_M01	0.738902	PCx_M03	0.659588	FWM_M01	0.949716
CACNG4	HIP_M04	0.46449	TCx_M00	0.224724	PCx_M00	0.264805	FWM_M00	0.297248
CACNG5	HIP_M00	0.319548	TCx_M00	0.393844	PCx_M00	0.256369	FWM_M02	0.452293
CACNG7	HIP_M14	0.693955	TCx_M13	0.69357	PCx_M14	0.77003	FWM_M09	0.835828
CACNG8	HIP_M02	0.674612	TCx_M01	0.647678	PCx_M03	0.611618	FWM_M01	0.946327
CACTIN	HIP_M14	0.884297	TCx_M13	0.891543	PCx_M14	0.86234	FWM_M08	0.872194
CACUL1	HIP_M10	0.678899	TCx_M08	0.75862	PCx_M09	0.654198	FWM_M00	0.238189
CACYBP	HIP_M05	0.839884	TCx_M10	0.683517	PCx_M11	0.727154	FWM_M06	0.762164
CACYBPP1	HIP_M00	0.280413	TCx_M00	0.300528	PCx_M01	0.561046	FWM_M00	0.0995561
CAD	HIP_M16	0.496877	TCx_M13	0.523085	PCx_M00	0.391603	FWM_M12	0.405851
CADM1	HIP_M05	0.521605	TCx_M17	0.444653	PCx_M00	0.374596	FWM_M00	0.036084
CADM2	HIP_M10	0.898841	TCx_M08	0.813911	PCx_M09	0.903066	FWM_M01	0.661072
CADM2-AS1	HIP_M10	0.524172	TCx_M08	0.500482	PCx_M03	0.459848	FWM_M01	0.588957
CADM2-AS2	HIP_M00	0.174171	TCx_M00	0.316338	PCx_M00	0.275833	FWM_M00	0.130294
CADM3	HIP_M02	0.68077	TCx_M01	0.708202	PCx_M03	0.712158	FWM_M01	0.962685
CADM3-AS1	HIP_M00	0.340677	TCx_M07	0.48276	PCx_M00	0.385831	FWM_M01	0.916859
CADM4	HIP_M19	0.701294	TCx_M13	0.513787	PCx_M19	0.680822	FWM_M15	0.914358
CADPS	HIP_M02	0.909538	TCx_M01	0.91324	PCx_M03	0.677855	FWM_M01	0.925295
CADPS2	HIP_M04	0.794449	TCx_M01	0.819382	PCx_M03	0.746204	FWM_M01	0.923865
CAHM	HIP_M15	0.526018	TCx_M00	0.393318	PCx_M16	0.547728	FWM_M15	0.839428
CALB1	HIP_M01	0.598534	TCx_M03	0.62652	PCx_M03	0.60045	FWM_M01	0.847672
CALB2	HIP_M03	0.647572	TCx_M04	0.419778	PCx_M03	0.514648	FWM_M01	0.811901
CALCOCO1	HIP_M16	0.495426	TCx_M00	0.388154	PCx_M11	0.470242	FWM_M04	0.405829
CALCOCO2	HIP_M17	0.499185	TCx_M07	0.654615	PCx_M07	0.675628	FWM_M16	0.6745
CALCRL	HIP_M10	0.463769	TCx_M08	0.593744	PCx_M09	0.520015	FWM_M16	0.437011
CALD1	HIP_M16	0.569205	TCx_M17	0.741753	PCx_M13	0.767035	FWM_M07	0.643943
CALHM2	HIP_M16	0.533719	TCx_M16	0.438888	PCx_M00	0.361292	FWM_M00	0.382009
CALM1	HIP_M02	0.78043	TCx_M03	0.862337	PCx_M03	0.805788	FWM_M01	0.912623
CALM2	HIP_M10	0.757951	TCx_M04	0.862243	PCx_M09	0.56005	FWM_M00	0.390238
CALM2P2	HIP_M10	0.630316	TCx_M08	0.490646	PCx_M09	0.473995	FWM_M00	0.332979
CALM3	HIP_M02	0.755628	TCx_M01	0.859702	PCx_M03	0.704791	FWM_M01	0.951171
CALML4	HIP_M00	0.232539	TCx_M00	0.326885	PCx_M00	0.228033	FWM_M00	0.325422
CALN1	HIP_M02	0.817608	TCx_M03	0.676541	PCx_M03	0.594917	FWM_M01	0.805063
CALR	HIP_M18	0.507493	TCx_M18	0.506462	PCx_M18	0.572063	FWM_M13	0.547793
CALU	HIP_M04	0.434762	TCx_M18	0.453492	PCx_M07	0.431163	FWM_M13	0.600586
CALY	HIP_M14	0.550819	TCx_M02	0.864127	PCx_M03	0.535059	FWM_M01	0.906333
CAMK1	HIP_M02	0.611926	TCx_M02	0.624055	PCx_M03	0.443057	FWM_M01	0.917807
CAMK1D	HIP_M02	0.788217	TCx_M03	0.583896	PCx_M03	0.661873	FWM_M01	0.960176
CAMK1G	HIP_M04	0.815899	TCx_M01	0.745806	PCx_M03	0.542727	FWM_M01	0.950649
CAMK2A	HIP_M02	0.603085	TCx_M02	0.587161	PCx_M03	0.619903	FWM_M01	0.939941
CAMK2B	HIP_M02	0.695472	TCx_M02	0.843476	PCx_M03	0.680769	FWM_M01	0.951875
CAMK2D	HIP_M03	0.591262	TCx_M01	0.604962	PCx_M03	0.548566	FWM_M01	0.816476
CAMK2G	HIP_M03	0.492257	TCx_M03	0.524728	PCx_M03	0.502637	FWM_M01	0.914172
CAMK2N1	HIP_M01	0.720564	TCx_M03	0.56115	PCx_M03	0.584584	FWM_M01	0.721475
CAMK2N2	HIP_M01	0.406841	TCx_M02	0.504782	PCx_M14	0.503282	FWM_M01	0.889153
CAMK4	HIP_M02	0.758477	TCx_M03	0.749504	PCx_M03	0.704136	FWM_M01	0.907229
CAMKK1	HIP_M01	0.5969	TCx_M02	0.671567	PCx_M03	0.595187	FWM_M01	0.958651
CAMKK2	HIP_M04	0.608928	TCx_M03	0.832389	PCx_M03	0.773693	FWM_M01	0.967107
CAMKMT	HIP_M00	0.270837	TCx_M00	0.361241	PCx_M07	0.4298	FWM_M00	0.296611
CAMKV	HIP_M02	0.754333	TCx_M01	0.72426	PCx_M03	0.680263	FWM_M01	0.940541
CAMLG	HIP_M10	0.59798	TCx_M08	0.667011	PCx_M09	0.463667	FWM_M01	0.594358
CAMSAP1	HIP_M02	0.665298	TCx_M02	0.676793	PCx_M03	0.599777	FWM_M09	0.733878
CAMSAP2	HIP_M05	0.776803	TCx_M08	0.762424	PCx_M03	0.592331	FWM_M01	0.814867
CAMSAP3	HIP_M14	0.841743	TCx_M13	0.888316	PCx_M14	0.909371	FWM_M01	0.857412
CAMTA1	HIP_M10	0.654319	TCx_M03	0.75745	PCx_M03	0.673236	FWM_M01	0.910034
CAMTA2	HIP_M04	0.433133	TCx_M13	0.506074	PCx_M14	0.530303	FWM_M01	0.854493
CAND1	HIP_M10	0.76662	TCx_M01	0.714144	PCx_M09	0.601315	FWM_M01	0.725651
CAND2	HIP_M14	0.574222	TCx_M13	0.753025	PCx_M14	0.766107	FWM_M09	0.741384
CANT1	HIP_M00	0.393521	TCx_M10	0.510307	PCx_M00	0.368272	FWM_M00	0.390649
CANX	HIP_M10	0.47835	TCx_M08	0.624684	PCx_M09	0.567898	FWM_M02	0.633653
CAP1	HIP_M18	0.517097	TCx_M18	0.49885	PCx_M04	0.584454	FWM_M02	0.740043
CAP1P1	HIP_M00	0.390637	TCx_M01	0.63268	PCx_M03	0.412759	FWM_M01	0.880706
CAP2	HIP_M02	0.818855	TCx_M01	0.832852	PCx_M03	0.76825	FWM_M01	0.900982
CAPG	HIP_M20	0.612128	TCx_M20	0.619491	PCx_M20	0.569274	FWM_M17	0.78392
CAPN1	HIP_M14	0.766481	TCx_M13	0.782765	PCx_M14	0.787157	FWM_M09	0.838692
CAPN10	HIP_M14	0.89658	TCx_M13	0.912974	PCx_M14	0.821228	FWM_M08	0.854348
CAPN10-AS1	HIP_M00	0.204359	TCx_M00	0.144592	PCx_M00	0.20138	FWM_M00	0.382953
CAPN13	HIP_M19	0.691004	TCx_M19	0.692887	PCx_M19	0.861248	FWM_M15	0.907409
CAPN15	HIP_M14	0.909008	TCx_M13	0.881714	PCx_M14	0.902212	FWM_M09	0.762323
CAPN2	HIP_M16	0.709005	TCx_M00	0.396822	PCx_M17	0.471322	FWM_M12	0.528683
CAPN3	HIP_M19	0.772721	TCx_M19	0.829851	PCx_M19	0.888323	FWM_M16	0.873698
CAPN5	HIP_M14	0.471245	TCx_M13	0.521633	PCx_M14	0.445733	FWM_M01	0.745005
CAPN7	HIP_M13	0.444708	TCx_M08	0.428135	PCx_M00	0.267764	FWM_M16	0.685238
CAPNS1	HIP_M06	0.436182	TCx_M04	0.4607	PCx_M07	0.564741	FWM_M04	0.438031
CAPRIN1	HIP_M05	0.631007	TCx_M04	0.641117	PCx_M00	0.322486	FWM_M00	0.279635
CAPRIN2	HIP_M02	0.472388	TCx_M15	0.470473	PCx_M08	0.474395	FWM_M01	0.896684
CAPS	HIP_M17	0.750645	TCx_M16	0.752785	PCx_M00	0.38426	FWM_M12	0.783086
CAPS2	HIP_M10	0.436704	TCx_M01	0.527747	PCx_M00	0.276856	FWM_M01	0.695924
CAPSL	HIP_M17	0.81638	TCx_M00	0.167721	PCx_M00	0.227429	FWM_M00	0.216595
CAPZA1	HIP_M10	0.499151	TCx_M18	0.453709	PCx_M04	0.593508	FWM_M02	0.62704
CAPZA2	HIP_M10	0.845352	TCx_M08	0.867681	PCx_M09	0.812178	FWM_M01	0.602492
CAPZB	HIP_M06	0.669471	TCx_M15	0.702921	PCx_M16	0.62653	FWM_M00	0.33352
CARD16	HIP_M18	0.495185	TCx_M18	0.406921	PCx_M20	0.435972	FWM_M14	0.696362
CARD6	HIP_M20	0.499881	TCx_M17	0.482169	PCx_M17	0.453669	FWM_M17	0.555448
CARD8	HIP_M20	0.534841	TCx_M17	0.612041	PCx_M17	0.528028	FWM_M16	0.79616
CARD8-AS1	HIP_M00	0.232692	TCx_M00	0.203586	PCx_M00	0.361589	FWM_M17	0.435481
CARF	HIP_M19	0.535031	TCx_M15	0.659638	PCx_M16	0.808231	FWM_M15	0.879251
CARHSP1	HIP_M19	0.526894	TCx_M16	0.69244	PCx_M19	0.474404	FWM_M15	0.822097
CARKD	HIP_M15	0.524987	TCx_M04	0.521158	PCx_M04	0.546737	FWM_M08	0.604259
CARM1	HIP_M14	0.612424	TCx_M13	0.582245	PCx_M14	0.619219	FWM_M09	0.83876
CARNS1	HIP_M15	0.756733	TCx_M19	0.736294	PCx_M19	0.837747	FWM_M15	0.882518
CARS	HIP_M05	0.419073	TCx_M04	0.421203	PCx_M00	0.313683	FWM_M13	0.481474
CARS2	HIP_M14	0.472027	TCx_M13	0.491443	PCx_M00	0.374692	FWM_M08	0.45844
CARTPT	HIP_M00	0.395901	TCx_M04	0.416769	PCx_M00	0.353186	FWM_M01	0.61654
CASC1	HIP_M17	0.595605	TCx_M00	0.287885	PCx_M07	0.473685	FWM_M01	0.72419
CASC10	HIP_M12	0.508541	TCx_M16	0.632758	PCx_M00	0.361999	FWM_M09	0.416516
CASC2	HIP_M17	0.530685	TCx_M15	0.56452	PCx_M16	0.571692	FWM_M00	0.252149
CASC3	HIP_M16	0.686882	TCx_M17	0.599298	PCx_M07	0.598379	FWM_M16	0.811698
CASC4	HIP_M10	0.610947	TCx_M08	0.515036	PCx_M09	0.777926	FWM_M15	0.52518
CASC6	HIP_M01	0.674498	TCx_M00	0.225542	PCx_M00	0.223039	FWM_M00	0.317805
CASD1	HIP_M10	0.86957	TCx_M08	0.786259	PCx_M09	0.788582	FWM_M01	0.437117
CASK	HIP_M02	0.462249	TCx_M08	0.588617	PCx_M03	0.486478	FWM_M00	0.238561
CASKIN1	HIP_M14	0.903621	TCx_M13	0.92913	PCx_M14	0.931804	FWM_M09	0.930959
CASKIN2	HIP_M14	0.776529	TCx_M13	0.749849	PCx_M14	0.567212	FWM_M12	0.857478
CASP1	HIP_M18	0.562164	TCx_M18	0.591827	PCx_M20	0.626819	FWM_M14	0.784721
CASP10	HIP_M00	0.224517	TCx_M07	0.471471	PCx_M00	0.39732	FWM_M17	0.690672
CASP2	HIP_M09	0.622718	TCx_M00	0.398485	PCx_M00	0.253469	FWM_M16	0.702472
CASP3	HIP_M10	0.45988	TCx_M08	0.481366	PCx_M09	0.464338	FWM_M00	0.377132
CASP4	HIP_M18	0.7299	TCx_M18	0.723597	PCx_M18	0.69436	FWM_M13	0.832511
CASP6	HIP_M00	0.223336	TCx_M00	0.239981	PCx_M00	0.232007	FWM_M00	0.251995
CASP7	HIP_M12	0.578576	TCx_M10	0.622444	PCx_M11	0.49873	FWM_M06	0.680554
CASP8	HIP_M00	0.380094	TCx_M00	0.270391	PCx_M00	0.238744	FWM_M00	0.335928
CASP8AP2	HIP_M00	0.352959	TCx_M00	0.316798	PCx_M00	0.365846	FWM_M16	0.587795
CASP9	HIP_M00	0.215609	TCx_M00	0.204615	PCx_M00	0.351396	FWM_M06	0.40373
CASQ1	HIP_M00	0.322428	TCx_M04	0.574341	PCx_M03	0.450727	FWM_M01	0.812608
CAST	HIP_M18	0.602316	TCx_M00	0.326836	PCx_M18	0.455369	FWM_M13	0.66868
CAT	HIP_M19	0.50401	TCx_M19	0.456551	PCx_M16	0.496777	FWM_M15	0.784547
CATSPER2	HIP_M06	0.436557	TCx_M00	0.379289	PCx_M00	0.25645	FWM_M01	0.433119
CATSPER2P1	HIP_M01	0.400508	TCx_M00	0.290808	PCx_M00	0.334603	FWM_M01	0.66704
CAV1	HIP_M00	0.262795	TCx_M12	0.424004	PCx_M13	0.468797	FWM_M16	0.547956
CAV2	HIP_M10	0.505431	TCx_M15	0.418316	PCx_M19	0.601024	FWM_M15	0.57885
CBFA2T2	HIP_M00	0.29476	TCx_M00	0.246724	PCx_M00	0.38997	FWM_M16	0.689329
CBFA2T3	HIP_M00	0.36305	TCx_M00	0.398588	PCx_M11	0.512279	FWM_M01	0.710718
CBFB	HIP_M10	0.512889	TCx_M19	0.523678	PCx_M19	0.647626	FWM_M16	0.888821
CBL	HIP_M05	0.70906	TCx_M10	0.579799	PCx_M11	0.599618	FWM_M00	0.369731
CBLB	HIP_M00	0.350385	TCx_M07	0.538963	PCx_M07	0.574004	FWM_M16	0.819736
CBLL1	HIP_M10	0.841295	TCx_M08	0.730101	PCx_M09	0.755218	FWM_M00	0.241526
CBLN2	HIP_M02	0.477512	TCx_M01	0.721219	PCx_M03	0.677374	FWM_M01	0.932009
CBLN4	HIP_M03	0.566829	TCx_M03	0.682685	PCx_M03	0.71263	FWM_M01	0.923707
CBR1	HIP_M15	0.637231	TCx_M19	0.648187	PCx_M19	0.746133	FWM_M15	0.833097
CBR3	HIP_M15	0.463091	TCx_M18	0.41032	PCx_M00	0.367135	FWM_M01	0.575418
CBR3-AS1	HIP_M10	0.427783	TCx_M00	0.390594	PCx_M16	0.532582	FWM_M00	0.151014
CBR4	HIP_M10	0.597492	TCx_M08	0.589043	PCx_M09	0.563944	FWM_M00	0.340274
CBS	HIP_M00	0.187732	TCx_M00	0.163411	PCx_M00	0.28145	FWM_M00	0.273636
CBWD1	HIP_M00	0.209759	TCx_M00	0.25809	PCx_M00	0.239601	FWM_M00	0.298705
CBWD2	HIP_M10	0.505255	TCx_M08	0.413305	PCx_M00	0.399612	FWM_M01	0.501555
CBWD3	HIP_M01	0.414478	TCx_M00	0.245658	PCx_M00	0.265733	FWM_M01	0.461748
CBWD5	HIP_M02	0.632803	TCx_M04	0.405314	PCx_M00	0.358524	FWM_M00	0.320386
CBWD6	HIP_M00	0.33524	TCx_M00	0.348189	PCx_M00	0.345748	FWM_M01	0.631044
CBX1	HIP_M00	0.332957	TCx_M04	0.41547	PCx_M07	0.618678	FWM_M04	0.464428
CBX1P1	HIP_M00	0.348091	TCx_M01	0.475786	PCx_M00	0.377251	FWM_M01	0.751317
CBX1P2	HIP_M00	0.355732	TCx_M07	0.419384	PCx_M00	0.345518	FWM_M00	0.260144
CBX3	HIP_M10	0.777146	TCx_M08	0.594115	PCx_M09	0.525869	FWM_M02	0.450708
CBX3P3	HIP_M00	0.275226	TCx_M00	0.379791	PCx_M00	0.33362	FWM_M00	0.2522
CBX3P4	HIP_M00	0.131336	TCx_M00	0.186294	PCx_M00	0.196155	FWM_M00	0.251498
CBX4	HIP_M14	0.700708	TCx_M13	0.650155	PCx_M14	0.665173	FWM_M10	0.675086
CBX5	HIP_M00	0.374625	TCx_M08	0.463225	PCx_M08	0.471204	FWM_M04	0.413463
CBX5P1	HIP_M00	0.295648	TCx_M00	0.273589	PCx_M00	0.244301	FWM_M16	0.514684
CBX6	HIP_M04	0.531537	TCx_M13	0.653039	PCx_M14	0.727755	FWM_M01	0.94332
CBX7	HIP_M14	0.482979	TCx_M02	0.621496	PCx_M14	0.621626	FWM_M01	0.843972
CBY1	HIP_M15	0.513244	TCx_M00	0.36334	PCx_M02	0.408253	FWM_M00	0.292202
CC2D1A	HIP_M14	0.80125	TCx_M13	0.818282	PCx_M14	0.749672	FWM_M09	0.727862
CC2D1B	HIP_M16	0.602545	TCx_M13	0.516795	PCx_M19	0.579559	FWM_M12	0.882904
CC2D2A	HIP_M15	0.413992	TCx_M17	0.423769	PCx_M00	0.391925	FWM_M00	0.196108
CCAR1	HIP_M09	0.659177	TCx_M07	0.724187	PCx_M07	0.736461	FWM_M16	0.657071
CCAR2	HIP_M14	0.459	TCx_M02	0.567765	PCx_M14	0.485785	FWM_M09	0.776057
CCBE1	HIP_M04	0.788964	TCx_M00	0.330649	PCx_M00	0.270978	FWM_M00	0.335687
CCBL1	HIP_M16	0.492931	TCx_M13	0.429467	PCx_M14	0.515253	FWM_M10	0.534837
CCBL2	HIP_M06	0.574782	TCx_M15	0.549764	PCx_M16	0.665353	FWM_M00	0.195546
CCDC101	HIP_M16	0.607178	TCx_M13	0.405069	PCx_M00	0.245451	FWM_M12	0.636473
CCDC102B	HIP_M06	0.479946	TCx_M15	0.435246	PCx_M16	0.520613	FWM_M00	0.284913
CCDC103	HIP_M15	0.475915	TCx_M00	0.390921	PCx_M00	0.390544	FWM_M00	0.189425
CCDC106	HIP_M14	0.821553	TCx_M13	0.858475	PCx_M14	0.848048	FWM_M09	0.880125
CCDC107	HIP_M14	0.459083	TCx_M13	0.427569	PCx_M14	0.509922	FWM_M08	0.519281
CCDC109B	HIP_M18	0.556189	TCx_M18	0.485898	PCx_M04	0.483462	FWM_M13	0.552477
CCDC112	HIP_M10	0.445625	TCx_M15	0.475032	PCx_M16	0.585433	FWM_M15	0.617738
CCDC113	HIP_M06	0.477484	TCx_M15	0.606889	PCx_M16	0.514169	FWM_M01	0.642779
CCDC115	HIP_M06	0.655513	TCx_M04	0.675785	PCx_M16	0.51165	FWM_M00	0.259307
CCDC117	HIP_M12	0.90291	TCx_M10	0.87395	PCx_M11	0.828486	FWM_M06	0.895176
CCDC12	HIP_M00	0.398772	TCx_M00	0.342594	PCx_M00	0.310925	FWM_M08	0.524263
CCDC120	HIP_M00	0.343892	TCx_M10	0.425814	PCx_M11	0.509901	FWM_M09	0.439956
[truncated: 17,231 more rows]
