# Supplementary material for: Neuropathological and transcriptomic characteristics of the aged brain
Source: eLife. 2017 Nov 9;6:e31126. doi: 10.7554/eLife.31126 (PMC5679757; doi:10.7554/eLife.31126)
Supplement: Figure 4—source data 2. — Cell type gene lists are derived from Zhang et al. (2014) and NeuroExpresso in the left and right panels, respectively, and enrichment p-values for each module are calculated using a hypergeometric test and are Bonferroni-corrected. [file elife-31126-fig4-data2.xlsx]

## Sheet: SourceData2
Cell type overlap using markers from Zhang et al. 2014					Cell type overlap using markers from NeuroExpresso (only cells with >=10 markers shown)
Module	Neuron	Astrocytes	Myelinating Oligodendrocytes	Microglia	Pyramidal Thy1	Dentate Granule	Gaba SSTReln	Astrocyte	Oligodendrocyte	Microglia	Microglia activation	Microglia deactivation
HIP_M01	3.67334e-09	1	1	1	0.677034	0.00140426	1	1	1	1	1	1
HIP_M02	5.6756e-183	1	1	1	0.00562884	1	0.348596	1	1	1	1	1
HIP_M03	1.81673e-36	1	1	1	1	1	1.21885e-09	1	1	1	1	1
HIP_M04	1.35894e-34	1	1	1	0.465427	1	1	1	1	1	1	1
HIP_M05	1	1	1	1	1	1	1	1	1	1	1	1
HIP_M06	1	1	1	1	1	1	1	1	1	1	1	1
HIP_M07	1	1	1	1	1	1	1	1	1	1	1	1
HIP_M08	1	1	1	1	1	1	1	1	1	1	1	1
HIP_M09	1	1	1	1	1	1	1	1	1	1	1	1
HIP_M10	1	0.0619398	1	1	1	1	1	1	1	1	1	1
HIP_M11	1	1	1	1	1	1	1	1	1	1	1	1
HIP_M12	1	1	1	1	1	1	1	1	1	1	1	1
HIP_M13	1	1	1	1	1	1	1	1	1	1	0.000199067	1
HIP_M14	1.72893e-06	1	0.0256985	5.43033e-15	1	1	1	1	1	1	1	1
HIP_M15	1	1.94248e-33	1	0.0152051	1	1	1	9.91058e-18	1	1	1	1
HIP_M16	1	3.83598e-08	1	4.89347e-16	1	1	1	0.0401548	1	1	1	0.220948
HIP_M17	1	1.04856e-18	1	1	1	1	1	7.01581e-05	1	1	1	1
HIP_M18	1	0.460377	1	1.94697e-77	1	1	1	1	1	6.49187e-08	2.97642e-18	0.792819
HIP_M19	1	1	9.43141e-64	1	1	1	1	1	4.42737e-25	1	1	1
HIP_M20	1	1	1	3.18771e-139	1	1	1	1	1	9.68799e-42	6.57162e-23	1.72214e-38
TCx_M01	1.81519e-189	1	1	1	NA	NA	NA	1	1	1	1	1
TCx_M02	2.54664e-42	1	1	1	NA	NA	NA	1	1	1	1	1
TCx_M03	2.23709e-27	1	1	1	NA	NA	NA	1	1	1	1	1
TCx_M04	1	1	1	1	NA	NA	NA	1	1	1	1	1
TCx_M05	1	1	1	1	NA	NA	NA	1	1	1	1	1
TCx_M06	1	1	1	1	NA	NA	NA	1	1	1	1	1
TCx_M07	1	1	1	1	NA	NA	NA	1	1	1	1	1
TCx_M08	1	1	1	1	NA	NA	NA	1	1	1	1	1
TCx_M09	1	1	1	1	NA	NA	NA	1	1	1	1	1
TCx_M10	1	1	1	1	NA	NA	NA	1	1	1	1	1
TCx_M11	1	1	1	0.300781	NA	NA	NA	1	1	1	0.498878	1
TCx_M12	0.483194	0.000455167	1	1	NA	NA	NA	1	1	1	1	1
TCx_M13	2.84075e-05	1	0.205733	2.61308e-20	NA	NA	NA	1	1	1	1	1
TCx_M14	1	1	1	1	NA	NA	NA	1	1	1	1	1
TCx_M15	1	2.83438e-10	1	1	NA	NA	NA	0.00165781	1	1	1	1
TCx_M16	1	1.31547e-07	1	2.37871e-23	NA	NA	NA	3.01641e-08	1	1	1	1
TCx_M17	1	7.04473e-50	1	0.0112775	NA	NA	NA	3.0832e-15	0.140671	1	1	1
TCx_M18	1	0.000259672	1	4.92802e-98	NA	NA	NA	0.0387846	1.06716e-06	6.09156e-18	1.37248e-39	1
TCx_M19	1	0.528697	8.41417e-81	1	NA	NA	NA	1	1	1	1	1
TCx_M20	1	1	1	1.13042e-79	NA	NA	NA	1	5.91595e-28	9.71477e-34	0.00410657	1
PCx_M01	1	1	1	1	NA	NA	NA	1	1	1	1	1
PCx_M02	1	1	1	1	NA	NA	NA	1	1	1	1	1
PCx_M03	1.56784e-268	1	1	1	NA	NA	NA	1	1	1	1	1
PCx_M04	1	1	1	2.24415e-11	NA	NA	NA	1	1	1	1	1
PCx_M05	1	1	1	1	NA	NA	NA	1	1	1	1	1
PCx_M06	1	1	1	1	NA	NA	NA	1	1	1	1	1
PCx_M07	1	0.421733	1	1	NA	NA	NA	1	1	1	1	1
PCx_M08	1	1	1	1	NA	NA	NA	1	1	1	1	1
PCx_M09	1	0.382289	1	1	NA	NA	NA	1	1	1	1	1
PCx_M10	1	1	1	1	NA	NA	NA	1	1	1	1	1
PCx_M11	1	1	1	1	NA	NA	NA	1	1	1	1	1
PCx_M12	1	1	1	1	NA	NA	NA	1	1	1	0.0466995	1
PCx_M13	0.0111708	9.86675e-07	1	1	NA	NA	NA	1	1	1	1	1
PCx_M14	2.27274e-21	1	1	5.70205e-14	NA	NA	NA	1	1	1	1	1
PCx_M15	1	1	1	0.214049	NA	NA	NA	1	1	1	1	1
PCx_M16	1	6.86747e-13	1	1	NA	NA	NA	4.41106e-08	1	1	1	1
PCx_M17	1	7.52809e-23	1	6.52977e-08	NA	NA	NA	4.65059e-08	0.000475824	0.0890284	1	1
PCx_M18	1	1.35983e-08	1	5.33321e-50	NA	NA	NA	0.0310149	0.0280859	2.99726e-05	3.40394e-18	1
PCx_M19	1	0.164968	3.21369e-85	1	NA	NA	NA	1	1	1	1	1
PCx_M20	1	1	1	1.9396e-150	NA	NA	NA	1	2.02252e-33	1.32382e-51	8.31382e-28	1
FWM_M01	2.89885e-271	1	1	1	NA	NA	NA	1	1	1	1	1
FWM_M02	1	1	1	2.69918e-09	NA	NA	NA	1	1	1	1	1
FWM_M03	1	1	1	1	NA	NA	NA	1	1	1	1	1
FWM_M04	1	1	1	1	NA	NA	NA	1	1	1	1	1
FWM_M05	1	1	1	1	NA	NA	NA	1	1	1	1	1
FWM_M06	1	1	1	1	NA	NA	NA	1	1	1	1	1
FWM_M07	1	0.000517235	1	1	NA	NA	NA	1	1	1	1	1
FWM_M08	1	1	1	0.00144654	NA	NA	NA	1	1	1	1	1
FWM_M09	0.00236314	1	1	1	NA	NA	NA	1	1	1	1	1
FWM_M10	1	1	0.0109721	2.20335e-09	NA	NA	NA	1	1	1	1	1
FWM_M11	1	1	1	0.0367624	NA	NA	NA	1	0.212386	0.0052429	1	1
FWM_M12	1	1	2.42893e-10	8.40663e-10	NA	NA	NA	1	1	1	1	1
FWM_M13	1	0.000140298	1	1.84476e-36	NA	NA	NA	1	1	0.00127203	2.48819e-13	1
FWM_M14	1	1	1	5.78075e-70	NA	NA	NA	1	1.92552e-10	7.93074e-17	6.18994e-19	1
FWM_M15	1	0.0015163	6.24452e-26	1	NA	NA	NA	1	1	1	1	1
FWM_M16	1	6.54693e-07	1.39641e-08	1	NA	NA	NA	1	1	1	1	1
FWM_M17	1	1	1	5.21561e-118	NA	NA	NA	1	5.32121e-43	4.01977e-41	4.90024e-11	1
