# Supplementary material for: Neuropathological and transcriptomic characteristics of the aged brain
Source: eLife. 2017 Nov 9;6:e31126. doi: 10.7554/eLife.31126 (PMC5679757; doi:10.7554/eLife.31126)
Supplement: Figure 4—source data 3. — Module eigengene expression is compared with 24 demographic and pathology metrics (including Dementia/control, AD/control, sex, measures of tau and abeta pathology, and inflammatory markers) using SVA, and p-values are Bonferroni-corrected. [file elife-31126-fig4-data3.xlsx]

## Sheet: SourceData3
Module	Age	ACT demented	dsm_IV (has AD)	CASI irt	Braak stage	AT8 IHC (fresh frozen)	AT8 IHC (FFPE)	Tau2 IHC (FFPE)	ptau luminex (ng/mg)	tau luminex (ng/mg)	CERAD score	Abeta IHC (fresh frozen)	Abeta IHC (FFPE)	AB42 luminex (pg/mg)	TNF-a luminex (pg/mg)	IL-6 luminex (pg/mg)	MIP1a luminex (pg/mg)	MCP1 luminex (pg/mg)	Rantes luminex (pg/mg)	IL-7 luminex (pg/mg)	IBA1 IHC (FFPE)	GFAP IHC (FFPE)	Sex	ApoE4 allele	Education years
HIP_M01	1	1	1	1	1	1	1	1	1	1	1	1	1	1	1	1	1	1	1	1	1	1	1	1	1
HIP_M02	1	1	1	1	1	1	1	1	1	1	1	1	1	1	1	1	1	1	1	1	1	1	1	1	1
HIP_M03	1	1	1	1	1	1	1	1	1	1	1	1	1	1	1	1	1	1	1	1	1	1	1	1	1
HIP_M04	1	1	1	1	1	1	1	1	1	1	1	1	1	1	1	1	1	1	1	1	1	1	1	1	1
HIP_M05	1	1	1	1	1	1	1	1	1	1	1	1	1	1	1	1	1	1	1	1	1	1	1	1	1
HIP_M06	1	1	1	1	1	1	1	1	1	1	1	1	1	1	1	1	1	1	1	1	1	1	1	1	1
HIP_M07	1	1	1	1	1	1	1	1	1	1	1	1	1	1	1	1	1	1	1	1	1	1	1	1	1
HIP_M08	1	1	1	1	1	1	1	1	1	1	1	1	1	1	1	1	1	1	1	1	1	1	1	1	1
HIP_M09	1	1	1	1	1	1	1	1	1	1	1	1	1	1	1	1	1	1	1	1	1	1	1	1	1
HIP_M10	1	1	1	1	1	1	1	1	1	1	1	1	1	1	1	1	1	1	1	1	1	1	1	1	1
HIP_M11	1	1	1	1	1	1	1	1	1	1	1	1	1	1	1	1	1	1	1	1	1	1	0	1	1
HIP_M12	1	1	1	1	1	1	1	1	1	1	1	1	1	1	1	1	1	1	1	1	1	1	1	1	1
HIP_M13	1	1	1	1	1	1	1	1	1	1	1	1	1	1	1	1	1	1	1	1	1	1	1	1	1
HIP_M14	1	1	1	1	1	1	1	1	1	1	1	1	1	1	1	1	1	1	1	1	1	1	1	1	1
HIP_M15	1	1	1	1	1	1	1	1	1	1	1	1	1	1	1	1	1	1	1	1	1	1	1	1	1
HIP_M16	1	1	1	1	0.232049	0.000761946	1	1	1	1	1	1	1	1	1	1	1	1	1	1	1	1	1	1	1
HIP_M17	1	1	1	1	1	1	1	1	1	1	1	1	1	1	1	1	1	1	1	1	1	1	1	1	1
HIP_M18	1	1	1	1	1	1	1	1	1	1	1	1	1	1	1	1	8.52939e-06	1	1	1	1	1	1	1	1
HIP_M19	1	1	1	1	1	1	1	1	1	1	1	1	1	1	1	1	1	1	1	1	1	1	1	1	1
HIP_M20	1	1	1	1	1	1	1	1	1	1	1	1	1	1	1	1	1	1	1	1	1	1	1	1	1
TCx_M01	1	1	1	1	1	1	1	1	1	1	1	1	1	1	1	1	1	1	1	1	1	1	1	1	1
TCx_M02	1	1	1	1	1	1	1	1	1	1	1	1	1	1	1	1	1	1	1	1	1	1	1	1	1
TCx_M03	1	1	1	1	1	1	1	1	1	1	1	1	1	1	1	1	1	1	1	1	1	1	1	1	1
TCx_M04	1	1	1	1	1	1	1	1	1	1	1	1	1	1	1	1	1	1	1	1	1	1	1	1	1
TCx_M05	1	1	1	1	1	1	1	1	1	1	1	1	1	1	1	1	1	1	1	1	1	1	1	1	1
TCx_M06	1	1	1	1	1	1	1	1	1	1	1	1	1	1	1	1	1	1	1	1	1	1	1	1	1
TCx_M07	1	1	1	1	1	1	1	1	1	1	1	1	1	1	1	1	1	1	1	1	1	1	1	1	1
TCx_M08	1	1	1	1	1	1	1	1	1	1	1	1	1	1	1	1	1	1	1	1	1	1	1	1	1
TCx_M09	1	1	1	1	1	1	1	1	1	1	1	1	1	1	1	1	1	1	1	1	1	1	0	1	1
TCx_M10	1	1	1	1	1	1	1	1	0.34054	1	1	1	1	1	1	1	1	1	1	1	1	1	1	1	1
TCx_M11	1	1	1	1	1	1	1	1	1	1	1	1	1	1	1	1	1	1	1	1	1	1	1	1	1
TCx_M12	1	1	1	1	1	1	1	1	1	1	1	1	1	1	1	1	1	1	1	1	1	1	1	1	1
TCx_M13	1	1	1	1	1	1	1	1	1	1	1	1	1	1	1	1	1	1	1	1	1	1	1	1	1
TCx_M14	1	1	1	1	1	1	1	1	1	1	1	1	1	1	1	1	1	1	1	1	1	1	1	1	1
TCx_M15	1	1	1	1	1	1	1	1	1	1	1	1	1	1	1	1	1	1	1	1	1	1	1	1	1
TCx_M16	1	1	1	1	1	0.273792	1	0.275226	1	1	1	1	1	1	1	1	1	1	1	1	1	1	1	1	1
TCx_M17	1	1	1	1	1	1	1	1	1	1	1	1	1	1	1	1	1	1	1	1	1	1	1	1	1
TCx_M18	1	1	1	1	1	1	1	1	1	1	1	1	1	1	1	1.22018e-07	1	0.000520473	1	1	1	1	1	1	1
TCx_M19	1	1	1	1	1	1	1	1	1	1	1	1	1	1	1	1	1	1	1	1	1	1	1	1	1
TCx_M20	1	1	1	1	1	1	1	1	1	1	1	1	1	1	1	1	1	1	1	1	1	1	1	1	1
PCx_M01	1	1	1	1	1	1	1	1	1	1	1	1	1	1	1	1	1	1	1	1	1	1	1	1	1
PCx_M02	1	1	1	1	1	1	1	1	1	1	1	1	1	1	1	1	1	1	1	1	1	1	1	1	1
PCx_M03	1	1	1	1	1	1	1	1	1	1	1	1	1	1	1	1	1	1	1	1	1	1	1	1	1
PCx_M04	1	1	1	1	1	1	1	1	1	1	1	1	1	1	1	1	1	1	1	1	1	1	1	1	1
PCx_M05	1	1	1	1	1	1	1	1	1	1	1	1	1	1	1	1	1	1	1	1	1	1	1	1	1
PCx_M06	1	1	1	1	1	1	1	1	1	1	1	1	1	1	1	1	1	1	1	1	1	1	1	1	1
PCx_M07	1	1	1	1	1	1	1	1	1	1	1	1	1	1	1	1	1	1	1	1	1	1	1	1	1
PCx_M08	1	1	1	1	1	1	1	1	1	1	1	1	1	1	1	1	1	1	1	1	1	1	1	1	1
PCx_M09	1	1	1	1	1	1	1	1	1	1	1	1	1	1	1	1	1	1	1	1	1	1	1	1	1
PCx_M10	1	1	1	1	1	1	1	1	1	1	1	1	1	1	1	1	1	1	1	1	1	1	0	1	1
PCx_M11	1	1	1	1	1	1	1	1	1	1	1	1	1	1	1	1	1	1	1	1	1	1	1	1	1
PCx_M12	1	1	1	1	1	1	1	1	1	1	1	1	1	1	1	1	1	1	1	1	1	1	1	1	1
PCx_M13	1	1	1	1	1	1	1	1	1	1	1	1	1	1	1	1	1	1	1	1	1	1	1	1	1
PCx_M14	1	1	1	1	1	1	1	1	1	1	1	1	1	1	1	1	1	1	1	1	1	1	1	1	1
PCx_M15	1	1	1	1	1	1	1	1	1	1	1	1	1	1	1	1	1	1	1	1	1	1	1	1	1
PCx_M16	1	1	1	1	1	1	1	1	1	1	1	1	1	1	1	1	1	1	1	1	1	1	1	1	1
PCx_M17	1	1	1	1	1	1	1	1	1	1	1	1	1	1	1	1	1	1	1	1	1	1	1	1	1
PCx_M18	1	1	1	1	1	1	1	1	1	1	1	1	1	1	1	3.85274e-07	1	0.0272128	1	1	1	1	1	1	1
PCx_M19	1	1	1	1	1	1	1	1	1	1	1	1	1	1	1	1	1	1	1	1	1	1	1	1	1
PCx_M20	1	1	1	1	1	1	1	1	1	1	1	1	1	1	1	1	1	1	1	1	1	1	1	1	1
FWM_M01	1	1	1	1	1	1	1	1	1	1	1	1	1	1	1	1	1	1	1	1	1	1	1	1	1
FWM_M02	1	1	1	1	1	1	1	1	1	1	1	1	1	1	1	1	1	1	1	1	1	1	1	1	1
FWM_M03	1	1	1	1	1	1	1	1	1	1	1	1	1	1	1	1	1	1	1	1	1	1	1	1	1
FWM_M04	1	1	1	1	1	1	1	1	1	1	1	1	1	1	1	1	1	1	1	1	1	1	1	1	1
FWM_M05	1	1	1	1	1	1	1	1	1	1	1	1	1	1	1	1	1	1	1	1	1	1	0	1	1
FWM_M06	1	1	1	1	1	1	1	1	0.144409	1	1	1	1	1	1	1	1	1	1	1	1	1	1	1	1
FWM_M07	1	1	1	1	1	1	1	1	1	1	1	1	1	1	1	1	1	1	1	1	1	1	1	1	1
FWM_M08	1	1	1	1	1	1	0.450245	1	1	1	1	1	1	1	1	1	1	1	1	1	1	1	1	1	1
FWM_M09	1	1	1	1	1	1	0.257337	1	1	1	1	1	1	1	1	1	1	1	1	1	1	1	1	1	1
FWM_M10	1	1	1	1	1	1	1	1	1	1	1	1	1	1	1	1	1	1	1	1	1	1	1	1	1
FWM_M11	1	1	1	1	1	1	1	1	1	1	1	1	1	1	1	0.0101553	1	1	1	1	1	1	1	1	1
FWM_M12	1	1	1	1	1	1	1	1	1	1	1	1	1	1	1	1	1	1	1	1	1	1	1	1	1
FWM_M13	1	1	1	1	1	1	1	1	1	1	1	1	1	1	1	6.48619e-09	1	0.0260922	1	1	1	1	1	1	1
FWM_M14	1	1	1	1	1	1	1	1	1	1	1	1	1	1	1	0.000157892	1	1	1	1	1	1	1	1	1
FWM_M15	1	1	1	1	1	1	1	1	1	1	1	1	1	1	1	1	1	1	1	1	1	1	1	1	1
FWM_M16	1	1	1	1	1	1	1	1	1	1	1	1	1	1	1	1	1	1	1	1	1	1	1	1	1
FWM_M17	1	1	1	1	1	1	1	1	1	1	1	1	1	1	1	1	1	1	1	1	1	1	1	1	1
