# Supplementary material for: Neuropathological and transcriptomic characteristics of the aged brain
Source: eLife. 2017 Nov 9;6:e31126. doi: 10.7554/eLife.31126 (PMC5679757; doi:10.7554/eLife.31126)
Supplement: Figure 6—source data 2. [file elife-31126-fig6-data2.xlsx]

## Sheet: SourceData2
Gene	RIN corr. (HIP)	RIN corr. (TCx)	RIN corr. (PCx)	RIN corr. (FWM)	SVA Pvalue (HIP)	SVA Pvalue (TCx)	SVA Pvalue (PCx)	SVA Pvalue (FWM)	sig? (HIP)	sig? (TCx)	sig? (PCx)	sig? (FWM)	sig in ALL
A1BG-AS1	-0.0650938	-0.0953578	0.153841	0.00387353	0.590017	0.398357	0.179405	0.978646	0	0	0	0	0
A2M	-0.168571	-0.391094	-0.418914	-0.152859	0.138024	0.000132562	7.05963e-05	0.200753	0	0	0	0	0
A2M-AS1	-0.373548	-0.202332	-0.234978	-0.0302606	0.000431677	0.0613237	0.0348774	0.821947	0	0	0	0	0
A2ML1	-0.231071	-0.453235	-0.625219	-0.27628	0.0373511	6.30675e-06	1.29623e-10	0.0145574	0	0	-1	0	0
AAAS	0.207539	0.339667	0.463232	0.592268	0.0637667	0.00107602	8.31837e-06	3.24976e-09	0	0	0	1	0
AACS	0.600433	0.662775	0.713197	0.153805	7.50255e-10	5.26535e-13	1.25107e-14	0.197774	1	1	1	0	0
AADAT	0.159426	0.318215	0.228809	0.3747	0.162436	0.00233085	0.0403604	0.000593365	0	0	0	0	0
AAED1	0.318375	-0.00725988	0.137884	0.363595	0.00318921	0.952504	0.231858	0.000898849	0	0	0	0	0
AAGAB	0.711251	0.747333	0.770191	0.422316	9.19745e-15	0	0	8.24093e-05	1	1	1	0	0
AAK1	0.436393	0.472601	0.536716	-0.0210751	2.74805e-05	2.14299e-06	1.1285e-07	0.877397	0	0	1	0	0
AAMDC	0.347211	-0.0150346	0.0639035	0.456787	0.00117306	0.900034	0.594356	1.60938e-05	0	0	0	0	0
AAMP	0.804481	0.78507	0.820706	0.754854	0	0	0	0	1	1	1	1	1
AAR2	0.109689	0.134312	0.0220154	0.392543	0.348277	0.225942	0.858999	0.000293911	0	0	0	0	0
AARS	0.678991	0.82185	0.873186	0.694862	4.1825e-13	0	0	2.03912e-13	1	1	1	1	1
AARS2	-0.373429	-0.232589	-0.302713	-0.530926	0.000433709	0.0299457	0.00556432	2.42697e-07	0	0	0	-1	0
AARSD1	0.833877	0.84387	0.860162	0.517077	0	0	0	5.74852e-07	1	1	1	1	1
AASDH	0.0773952	0.0827073	0.155745	0.32503	0.518526	0.467278	0.173789	0.00342511	0	0	0	0	0
AASDHPPT	0.830827	0.888162	0.905968	0.746465	0	0	0	0	1	1	1	1	1
AASS	0.162879	-0.224415	-0.337273	0.211996	0.15284	0.0367093	0.00180282	0.0679831	0	0	0	0	0
AATF	0.154663	0.276129	0.246948	0.21001	0.176358	0.00904333	0.0260407	0.0709048	0	0	0	0	0
AATK	-0.196835	-0.252616	-0.341197	-0.113349	0.0798337	0.0176708	0.00157253	0.355624	0	0	0	0	0
ABAT	0.401668	0.297203	0.215788	-0.182906	0.000134604	0.00470601	0.0541463	0.119869	0	0	0	0	0
ABCA1	-0.492883	-0.708942	-0.71205	-0.284324	1.35175e-06	2.1558e-15	1.36936e-14	0.0116759	0	-1	-1	0	0
ABCA10	0.263435	0.553391	0.541062	-0.00512464	0.0164897	1.06101e-08	8.45215e-08	0.971422	0	1	1	0	0
ABCA11P	0.575742	0.512363	0.537967	0.306393	5.35829e-09	1.86586e-07	1.03917e-07	0.00614512	1	1	1	0	0
ABCA2	-0.31392	-0.366113	-0.412768	-0.0469341	0.00368784	0.000382955	9.28822e-05	0.719573	0	0	0	0	0
ABCA3	-0.158711	-0.169835	-0.187975	-0.355131	0.164454	0.120736	0.0965814	0.00122499	0	0	0	0	0
ABCA5	0.627191	0.754211	0.795089	0.447083	7.37379e-11	0	0	2.60463e-05	1	1	1	0	0
ABCA6	-0.0709199	0.066572	0.12536	0.142868	0.555473	0.561771	0.279303	0.234545	0	0	0	0	0
ABCA7	-0.314945	-0.335486	-0.451601	-0.414467	0.00356599	0.00125403	1.49911e-05	0.000116827	0	0	0	0	0
ABCA8	-0.0549852	-0.0297852	0.0729882	0.294214	0.651631	0.800673	0.540869	0.00879702	0	0	0	0	0
ABCA9	-0.329293	-0.0948245	-0.0510289	-0.150525	0.00220958	0.40111	0.672587	0.208487	0	0	0	0	0
ABCB1	-0.444236	-0.6305	-0.556446	-0.491739	1.86938e-05	1.47816e-11	2.95869e-08	2.53819e-06	0	-1	-1	0	0
ABCB10	0.237504	0.355718	0.318767	0.23135	0.0319924	0.000580557	0.00335306	0.0445783	0	0	0	0	0
ABCB5	-0.503512	-0.539324	-0.49879	-0.345053	7.23189e-07	2.96196e-08	1.17977e-06	0.00174859	-1	-1	0	0	0
ABCB6	0.264528	0.324561	0.38488	0.0981683	0.0160112	0.00186455	0.000302838	0.429646	0	0	0	0	0
ABCB7	0.536376	0.358074	0.417464	0.621392	8.94194e-08	0.000528898	7.53802e-05	2.95114e-10	1	0	0	1	0
ABCB8	-0.496151	-0.461416	-0.500512	-0.427952	1.11611e-06	4.0279e-06	1.06694e-06	6.3754e-05	0	0	-1	0	0
ABCB9	-0.0539517	0.00594284	0.0214133	-0.197923	0.658323	0.961286	0.862903	0.0904335	0	0	0	0	0
ABCC1	-0.348878	-0.220992	-0.208211	-0.290581	0.00110404	0.0398575	0.0639297	0.00978006	0	0	0	0	0
ABCC10	-0.570561	-0.573939	-0.526518	-0.547459	7.94043e-09	2.17243e-09	2.17394e-07	8.26203e-08	-1	-1	-1	-1	-1
ABCC4	0.052099	-0.205728	-0.1732	0.288395	0.670048	0.0568246	0.12799	0.0104075	0	0	0	0	0
ABCC5	-0.0191437	0.193834	0.354368	0.00747114	0.879603	0.0738185	0.000980333	0.957984	0	0	0	0	0
ABCC8	-0.0755099	-0.25514	-0.060045	-0.267037	0.529626	0.016496	0.618028	0.0186177	0	0	0	0	0
ABCC9	-0.128244	-0.499228	-0.470751	-0.190989	0.268159	4.33014e-07	5.60452e-06	0.103387	0	0	0	0	0
ABCD2	0.565538	0.522257	0.516785	-0.0524989	1.154e-08	9.68645e-08	4.01194e-07	0.686646	1	1	1	0	0
ABCD3	0.467883	0.233522	0.204332	0.389579	5.48025e-06	0.0292544	0.0693648	0.00033113	0	0	0	0	0
ABCD4	-0.33569	-0.504395	-0.535001	-0.0420243	0.00177286	3.12047e-07	1.26168e-07	0.748842	0	-1	-1	0	0
ABCE1	0.788744	0.83062	0.842422	0.765901	0	0	0	0	1	1	1	1	1
ABCF1	0.436397	0.589333	0.604311	0.450288	2.74793e-05	6.14093e-10	7.74422e-10	2.22233e-05	0	1	1	0	0
ABCF2	0.782734	0.857792	0.870775	0.625084	0	0	0	2.14612e-10	1	1	1	1	1
ABCF3	0.725577	0.786323	0.810985	0.449534	1.31544e-15	0	0	2.30638e-05	1	1	1	0	0
ABCG1	-0.384686	-0.208633	-0.206616	0.0230424	0.000274736	0.0532333	0.0661261	0.865817	0	0	0	0	0
ABCG2	-0.321156	-0.411705	-0.359353	-0.277027	0.00290825	5.14896e-05	0.000815982	0.014278	0	0	0	0	0
ABCG4	0.587198	0.565882	0.499953	-0.0341865	2.20005e-09	4.1087e-09	1.10185e-06	0.797528	1	1	0	0	0
ABHD10	0.726365	0.784785	0.843769	0.727359	1.31544e-15	0	0	5.46724e-15	1	1	1	1	1
ABHD11	-0.368938	-0.392892	-0.465946	-0.446517	0.000517014	0.000122361	7.22192e-06	2.67852e-05	0	0	0	0	0
ABHD12	0.62321	0.779901	0.813257	0.69691	1.05519e-10	0	0	1.62624e-13	1	1	1	1	1
ABHD12B	-0.114596	0.482351	0.554736	0.189989	0.326009	1.21438e-06	3.3234e-08	0.105311	0	0	1	0	0
ABHD13	0.111157	0.155044	0.191261	0.0807503	0.341487	0.158663	0.090532	0.522862	0	0	0	0	0
ABHD14A	0.730929	0.767	0.746859	0.356387	0	0	0	0.00117102	1	1	1	0	0
ABHD14B	-0.0922431	-0.0886789	-0.187392	0.0598765	0.436273	0.433783	0.0977016	0.642835	0	0	0	0	0
ABHD15	-0.496079	-0.712341	-0.752229	-0.346166	1.12057e-06	1.44989e-15	0	0.00168151	0	-1	-1	0	0
ABHD16A	0.623207	0.725684	0.775656	0.619561	1.05519e-10	0	0	3.4589e-10	1	1	1	1	1
ABHD17A	-0.309825	-0.30189	-0.400468	-0.414563	0.00421411	0.00404302	0.00015872	0.00011637	0	0	0	0	0
ABHD17B	0.437252	0.461121	0.433117	0.47405	2.63275e-05	4.09308e-06	3.67014e-05	6.63965e-06	0	0	0	0	0
ABHD17C	-0.299149	-0.595052	-0.592934	-0.355659	0.00588188	3.76062e-10	1.95088e-09	0.00120246	0	-1	-1	0	0
ABHD2	0.405284	-0.144764	-0.149838	-0.294571	0.000115158	0.190002	0.191712	0.00870534	0	0	0	0	0
ABHD3	-0.0945436	-0.309601	-0.205013	0.114923	0.424271	0.00312805	0.0684005	0.348686	0	0	0	0	0
ABHD4	-0.506656	-0.6664	-0.703001	-0.162131	5.96734e-07	3.53185e-13	4.25573e-14	0.172592	-1	-1	-1	0	0
ABHD5	0.137586	-0.161966	-0.107199	0.36727	0.232983	0.140073	0.359497	0.000786154	0	0	0	0	0
ABHD6	0.691171	0.678917	0.767483	0.692417	1.07127e-13	8.4505e-14	0	2.69616e-13	1	1	1	1	1
ABHD8	-0.130305	-0.0794449	-0.0894575	-0.324005	0.260244	0.485926	0.448816	0.00353807	0	0	0	0	0
ABI1	0.756726	0.436375	0.48433	0.35757	0	1.53247e-05	2.68352e-06	0.00112136	1	0	0	0	0
ABI2	0.73197	0.699348	0.745143	0.156523	0	6.8014e-15	0	0.189277	1	1	1	0	0
ABI3	0.0350494	-0.205299	-0.332653	5.94668e-05	0.777711	0.0573902	0.00211131	0.999853	0	0	0	0	0
ABI3BP	-0.211747	-0.262623	-0.218456	0.266898	0.0581355	0.0133799	0.0510687	0.0186894	0	0	0	0	0
ABL1	-0.655489	-0.739918	-0.78457	-0.11722	4.94404e-12	0	0	0.338357	-1	-1	-1	0	0
ABL2	0.377454	0.499989	0.493993	0.291487	0.000368804	4.12865e-07	1.55588e-06	0.00952647	0	0	0	0	0
ABLIM1	-0.361971	-0.583713	-0.570783	-0.396228	0.000677432	9.78949e-10	1.0581e-08	0.000252719	0	-1	-1	0	0
ABLIM2	0.224989	0.482014	0.514987	-0.06136	0.0430913	1.23823e-06	4.49057e-07	0.633853	0	0	1	0	0
ABLIM3	-0.486343	-0.31461	-0.369909	-0.388878	1.97392e-06	0.00263756	0.000546868	0.000340216	0	0	0	0	0
ABR	-0.260579	-0.209512	-0.263405	-0.408469	0.0178062	0.052165	0.0170623	0.000151826	0	0	0	0	0
ABRACL	0.700257	0.828168	0.867307	0.41846	3.72377e-14	0	0	9.80932e-05	1	1	1	0	0
ABT1	0.561505	0.620566	0.543966	0.333249	1.55159e-08	3.81563e-11	6.94805e-08	0.00261149	1	1	1	0	0
ABTB1	-0.26073	-0.324189	-0.240322	-0.454364	0.0177392	0.00188972	0.0306757	1.81432e-05	0	0	0	0	0
ABTB2	-0.655023	-0.742458	-0.715367	-0.363126	5.17994e-12	0	8.90096e-15	0.000915185	-1	-1	-1	0	0
ACAA1	0.350194	0.0533203	0.173158	0.346919	0.00105194	0.64571	0.12808	0.00163956	0	0	0	0	0
ACAA2	0.158979	-0.45714	-0.45225	0.0850413	0.163711	5.08713e-06	1.45105e-05	0.498672	0	0	0	0	0
ACACA	0.689257	0.720006	0.827979	0.586019	1.32792e-13	0	0	5.21124e-09	1	1	1	1	1
ACACB	-0.568581	-0.791319	-0.807341	-0.551381	9.21355e-09	0	0	6.34837e-08	-1	-1	-1	-1	-1
ACAD10	0.172553	-0.260926	-0.187867	0.0238371	0.128391	0.0140348	0.0967685	0.86148	0	0	0	0	0
ACAD11	0.181116	0.0179451	0.199892	0.402276	0.109201	0.880468	0.076031	0.00019682	0	0	0	0	0
ACAD8	0.766187	0.810588	0.819033	0.640123	0	0	0	5.55807e-11	1	1	1	1	1
ACAD9	0.59438	0.460314	0.563709	0.395339	1.23545e-09	4.27845e-06	1.76817e-08	0.000262163	1	0	1	0	0
ACADL	-0.0783515	-0.0679507	-0.0415011	0.00856784	0.513122	0.553707	0.732917	0.951816	0	0	0	0	0
ACADM	0.498098	0.475367	0.414642	0.374494	9.96338e-07	1.82775e-06	8.54381e-05	0.000598272	0	0	0	0	0
ACADS	0.114224	-0.274488	-0.26128	0.00182118	0.327641	0.00948682	0.0180468	0.990503	0	0	0	0	0
ACADSB	0.489106	0.459255	0.472288	0.421742	1.68168e-06	4.5394e-06	5.16432e-06	8.4651e-05	0	0	0	0	0
ACADVL	-0.265416	-0.619226	-0.614855	-0.259911	0.0156511	4.33011e-11	3.19755e-10	0.0223671	0	-1	-1	0	0
ACAP2	0.406976	0.218705	0.269624	0.528068	0.000106892	0.0420718	0.0144359	2.90578e-07	0	0	0	1	0
ACAP3	-0.478052	-0.478376	-0.507768	-0.545178	3.14562e-06	1.53607e-06	6.95902e-07	9.60687e-08	0	0	-1	-1	0
ACAT1	0.681659	0.723961	0.671984	0.76442	3.1239e-13	0	1.38858e-12	0	1	1	1	1	1
ACAT2	0.779667	0.844848	0.875457	0.825368	0	0	0	0	1	1	1	1	1
ACBD3	0.537562	0.604668	0.6053	0.47331	8.28725e-08	1.62733e-10	7.13103e-10	6.91051e-06	1	1	1	0	0
ACBD4	-0.393981	-0.38712	-0.36861	-0.505637	0.000186921	0.000157608	0.00057509	1.13943e-06	0	0	0	-1	0
ACBD5	0.00951146	-0.000159402	-0.0799898	0.0601403	0.942577	0.999017	0.500642	0.641321	0	0	0	0	0
ACBD6	0.639092	0.688185	0.75518	0.589542	2.44795e-11	2.80832e-14	0	4.01557e-09	1	1	1	1	1
ACBD7	-0.0380994	-0.461728	-0.508943	-0.444837	0.758374	3.95961e-06	6.4811e-07	2.90561e-05	0	0	-1	0	0
ACCS	0.0685688	0.0945301	0.0258172	0.0648378	0.569558	0.402605	0.834543	0.612766	0	0	0	0	0
ACD	-0.0319741	0.0374494	0.181524	-0.100764	0.796957	0.750138	0.109506	0.416361	0	0	0	0	0
ACER1	-0.481188	-0.504814	-0.488536	-0.422384	2.6463e-06	3.04057e-07	2.12205e-06	8.21778e-05	0	-1	0	0	0
ACER2	-0.503528	-0.481483	-0.580796	-0.543664	7.22583e-07	1.27763e-06	5.0158e-09	1.06134e-07	-1	0	-1	-1	0
ACER3	0.382056	0.333812	0.298803	0.4211	0.000306163	0.00133358	0.00625619	8.72218e-05	0	0	0	0	0
ACHE	0.0977709	0.00139803	0.201169	-0.180735	0.407478	0.991316	0.0740515	0.124765	0	0	0	0	0
ACIN1	-0.472426	-0.428054	-0.480906	-0.248688	4.28788e-06	2.33388e-05	3.24136e-06	0.0296214	0	0	0	0	0
ACKR1	-0.0228264	-0.053691	-0.0129515	-0.0443484	0.856071	0.643216	0.916895	0.73494	0	0	0	0	0
ACKR3	-0.316075	-0.641318	-0.662585	-0.392991	0.00343952	5.05732e-12	3.68572e-12	0.000288689	0	-1	-1	0	0
ACKR4	-0.091754	0.0895727	0.050817	0.215408	0.438932	0.429042	0.673989	0.0633302	0	0	0	0	0
ACLY	0.794062	0.865695	0.894082	0.773607	0	0	0	0	1	1	1	1	1
ACO1	0.492597	0.154587	-0.0119732	0.27341	1.37351e-06	0.16	0.922986	0.0157019	0	0	0	0	0
ACO2	0.4505	0.512955	0.483258	0.0854688	1.36037e-05	1.79395e-07	2.84845e-06	0.49655	0	1	0	0	0
ACOT1	0.126247	0.137254	0.164406	0.187137	0.276235	0.215383	0.149725	0.111045	0	0	0	0	0
ACOT11	-0.30358	-0.418239	-0.405583	-0.407953	0.00513137	3.77339e-05	0.000127422	0.000155229	0	0	0	0	0
ACOT13	0.258354	0.219768	0.216581	0.314301	0.0188873	0.0410493	0.0532001	0.00481979	0	0	0	0	0
ACOT2	0.415114	0.335273	0.235738	0.258716	7.43189e-05	0.0012632	0.0342336	0.0230624	0	0	0	0	0
ACOT4	-0.0236951	0.378337	0.24614	-0.0975288	0.850427	0.000230137	0.0265741	0.432956	0	0	0	0	0
ACOT6	-0.457405	-0.545382	-0.503528	-0.431821	9.51986e-06	1.90935e-08	8.94958e-07	5.34997e-05	0	-1	-1	0	0
ACOT7	0.462983	0.645524	0.698944	0.117949	7.1015e-06	3.29795e-12	6.81431e-14	0.335137	0	1	1	0	0
ACOT8	0.641476	0.629927	0.66521	0.372247	1.94943e-11	1.56285e-11	2.82223e-12	0.000651276	1	1	1	0	0
ACOT9	0.642493	0.687918	0.66177	0.253109	1.76784e-11	2.93071e-14	4.00745e-12	0.0265613	1	1	1	0	0
ACOX1	0.544424	0.254939	0.180312	0.328036	5.18339e-08	0.016586	0.112078	0.00310609	1	0	0	0	0
ACOX2	-0.544658	-0.720827	-0.748565	-0.609806	5.10253e-08	0	0	7.90661e-10	-1	-1	-1	-1	-1
ACOX3	-0.343925	-0.307241	-0.23375	-0.337232	0.00132221	0.00338609	0.0358973	0.00228792	0	0	0	0	0
ACP1	0.860286	0.864827	0.907589	0.835029	0	0	0	0	1	1	1	1	1
ACP2	0.51865	0.512472	0.567888	0.310822	2.84099e-07	1.85247e-07	1.30697e-08	0.00536013	1	1	1	0	0
ACP6	-0.18742	-0.391723	-0.405968	-0.415609	0.0966613	0.000128847	0.000125297	0.000111198	0	0	0	0	0
ACRC	-0.480942	-0.481855	-0.47568	-0.411006	2.68414e-06	1.25019e-06	4.29989e-06	0.000136101	0	0	0	0	0
ACSBG1	0.0169972	-0.443766	-0.453475	-0.312933	0.893412	1.0437e-05	1.36502e-05	0.00501906	0	0	0	0	0
ACSF2	-0.34338	-0.667761	-0.667064	-0.412028	0.00134827	3.03608e-13	2.32734e-12	0.000130009	0	-1	-1	0	0
ACSF3	-0.393517	-0.437821	-0.434643	-0.534729	0.000190531	1.42351e-05	3.41608e-05	1.9051e-07	0	0	0	-1	0
ACSL1	0.400582	0.240751	0.210274	0.434045	0.000141038	0.024291	0.0610975	4.82997e-05	0	0	0	0	0
ACSL3	0.702636	0.812888	0.854612	0.658095	2.75889e-14	0	0	1.0098e-11	1	1	1	1	1
ACSL4	0.784546	0.83173	0.883894	0.768415	0	0	0	0	1	1	1	1	1
ACSL5	-0.371538	-0.418619	-0.50324	-0.410482	0.000467143	3.70546e-05	9.10605e-07	0.000139183	0	0	-1	0	0
ACSL6	0.705695	0.709434	0.718004	0.145233	1.95768e-14	1.44989e-15	6.44224e-15	0.226197	1	1	1	0	0
ACSM5	0.0474213	-0.418202	-0.328483	-0.121429	0.698759	3.77994e-05	0.00243161	0.319897	0	0	0	0	0
ACSS1	-0.404899	-0.677598	-0.627944	-0.467621	0.000117126	9.80491e-14	1.01717e-10	9.31468e-06	0	-1	-1	0	0
ACSS2	0.578121	0.462658	0.596384	0.553256	4.45999e-09	3.76067e-06	1.48121e-09	5.59786e-08	1	0	1	1	0
ACSS3	-0.16681	-0.649891	-0.707873	-0.370688	0.142498	2.099e-12	2.3061e-14	0.000690948	0	-1	-1	0	0
ACTA2	-0.134339	-0.0493289	-0.14591	-0.0419268	0.245079	0.672234	0.20417	0.749373	0	0	0	0	0
ACTA2-AS1	-0.0626098	-0.153239	-0.160902	-0.237698	0.605108	0.163974	0.159098	0.0385119	0	0	0	0	0
ACTB	0.692183	0.769126	0.762317	0.687318	9.56094e-14	0	0	4.71502e-13	1	1	1	1	1
ACTBP3	0.0147005	-0.0409569	-0.254673	-0.133506	0.908141	0.726993	0.0214256	0.269494	0	0	0	0	0
ACTBP4	-0.429695	-0.244657	-0.414516	-0.261258	3.78958e-05	0.0219146	8.59234e-05	0.0216206	0	0	0	0	0
ACTBP7	-0.440862	-0.269505	-0.172747	0.0936602	2.20744e-05	0.0109636	0.129049	0.452628	0	0	0	0	0
ACTG1	0.600516	0.588435	0.577122	0.511349	7.45295e-10	6.62167e-10	6.63115e-09	8.13968e-07	1	1	1	1	1
ACTG1P12	-0.00472236	0.176376	0.211182	-0.104745	0.971875	0.10618	0.0599104	0.39657	0	0	0	0	0
ACTG1P17	-0.552673	-0.565883	-0.663807	-0.471475	2.93589e-08	4.1087e-09	3.25306e-12	7.60353e-06	-1	-1	-1	0	0
ACTG1P18	-0.0360679	0.0997026	-0.0301231	-0.275082	0.771272	0.376444	0.807356	0.0150316	0	0	0	0	0
ACTG1P20	-0.554729	-0.527853	-0.518628	-0.430007	2.53474e-08	6.61485e-08	3.58025e-07	5.81511e-05	-1	-1	-1	0	0
ACTG1P3	-0.155911	-0.263314	-0.291614	-0.285171	0.172691	0.0131227	0.0077485	0.0114089	0	0	0	0	0
ACTG1P4	0.181845	0.204125	0.131694	-0.0153962	0.107691	0.0589337	0.254604	0.911373	0	0	0	0	0
ACTL6A	0.100314	-0.245662	-0.294998	0.317935	0.394183	0.0213266	0.00701037	0.00430606	0	0	0	0	0
ACTL6B	0.783162	0.834915	0.834368	0.146551	0	0	0	0.22162	1	1	1	0	0
ACTN1	0.113345	-0.0556484	0.0244789	-0.214692	0.331585	0.630962	0.843232	0.0642614	0	0	0	0	0
ACTN2	0.657929	0.792708	0.821325	0.430724	3.85722e-12	0	0	5.62491e-05	1	1	1	0	0
ACTN4	-0.472924	-0.272024	-0.354619	-0.0763311	4.17444e-06	0.0101946	0.000971428	0.547128	0	0	0	0	0
ACTR10	0.820191	0.849188	0.890414	0.771728	0	0	0	0	1	1	1	1	1
ACTR1A	0.82603	0.897964	0.904422	0.789436	0	0	0	0	1	1	1	1	1
ACTR1B	0.555649	0.666131	0.623221	0.202509	2.37603e-08	3.63638e-13	1.54874e-10	0.0824972	1	1	1	0	0
ACTR2	0.687044	0.710494	0.73123	0.483756	1.7098e-13	1.44989e-15	1.37341e-15	3.9469e-06	1	1	1	0	0
ACTR3	0.775226	0.775394	0.776025	0.705769	0	0	0	5.69626e-14	1	1	1	1	1
ACTR3B	0.771354	0.8141	0.862852	0.227909	0	0	0	0.0481175	1	1	1	0	0
ACTR3C	-0.220614	-0.0972364	-0.203508	-0.327359	0.0476275	0.388848	0.0705617	0.00317694	0	0	0	0	0
ACTR5	-0.0229104	0.19499	0.377943	0.434247	0.855469	0.0720024	0.000400193	4.78339e-05	0	0	0	0	0
ACTR6	0.720761	0.832624	0.881407	0.751152	2.48975e-15	0	0	0	1	1	1	1	1
ACTR8	0.706506	0.762028	0.73472	0.566523	1.75536e-14	0	7.1499e-16	2.20774e-08	1	1	1	1	1
ACVR1	-0.00543223	-0.403194	-0.406024	-0.436629	0.967819	7.67593e-05	0.000124991	4.2728e-05	0	0	0	0	0
ACVR1B	0.697466	0.67047	0.669415	0.0838393	5.25653e-14	2.24032e-13	1.82189e-12	0.505433	1	1	1	0	0
ACVR1C	0.612098	0.667836	0.705532	0.464387	2.80039e-10	3.01406e-13	3.11236e-14	1.09923e-05	1	1	1	0	0
ACVR2A	0.479085	0.498111	0.345495	0.0774128	2.97367e-06	4.64602e-07	0.00135012	0.541389	0	0	0	0	0
ACVR2B	-0.338828	-0.14989	-0.146997	-0.0366115	0.00158506	0.174029	0.200654	0.782849	0	0	0	0	0
ACVRL1	-0.511007	-0.519438	-0.517049	-0.493375	4.57364e-07	1.1688e-07	3.95044e-07	2.31727e-06	-1	-1	-1	0	0
ACY1	0.0220754	0.0621057	-0.0296744	-0.106734	0.860805	0.589925	0.810285	0.387053	0	0	0	0	0
ACY3	0.100299	0.0388901	-0.0921961	0.0825732	0.394247	0.740659	0.434165	0.512409	0	0	0	0	0
ACYP1	0.681914	0.798865	0.851145	0.663072	3.04617e-13	0	0	6.13839e-12	1	1	1	1	1
ACYP2	0.70611	0.772527	0.82024	0.722132	1.85839e-14	0	0	8.10744e-15	1	1	1	1	1
ADA	0.182042	0.0588986	-0.0860638	0.317535	0.107326	0.610358	0.466906	0.00436156	0	0	0	0	0
ADAL	0.523199	0.476305	0.343028	0.348229	2.12602e-07	1.73135e-06	0.00147338	0.00156609	1	0	0	0	0
ADAM10	0.39525	0.0252341	0.0793699	0.279655	0.000177212	0.831566	0.504092	0.0132901	0	0	0	0	0
ADAM11	0.24921	0.282597	0.39821	-0.157397	0.0238908	0.00744018	0.000174733	0.186656	0	0	0	0	0
ADAM15	-0.113545	-0.178436	-0.135446	0.146914	0.330747	0.101867	0.24078	0.220369	0	0	0	0	0
ADAM17	0.137193	0.220844	0.132633	0.297606	0.234441	0.0399954	0.251071	0.0079779	0	0	0	0	0
ADAM19	0.0164629	0.286102	0.295378	0.0447334	0.896778	0.00668535	0.00693293	0.732725	0	0	0	0	0
ADAM1A	-0.047968	0.132238	0.0823713	-0.110759	0.695487	0.233641	0.487137	0.367681	0	0	0	0	0
ADAM20	0.226767	0.297641	0.365386	0.00366846	0.0413076	0.00463879	0.000649836	0.979957	0	0	0	0	0
ADAM20P1	0.285948	0.428561	0.535308	0.0863754	0.00878393	2.27733e-05	1.23692e-07	0.491581	0	0	1	0	0
ADAM21	0.380444	0.457183	0.53126	0.133242	0.000326605	5.07633e-06	1.6042e-07	0.270511	0	0	1	0	0
ADAM22	0.783999	0.874231	0.891226	0.404853	0	0	0	0.000176963	1	1	1	0	0
ADAM23	0.809665	0.858467	0.884464	0.21981	0	0	0	0.0576099	1	1	1	0	0
ADAM28	0.326474	-0.00496606	-0.188125	0.31548	0.002432	0.967785	0.0963017	0.00464714	0	0	0	0	0
ADAM32	0.175291	0.286703	0.353569	-0.0937602	0.12198	0.00656003	0.00100894	0.452176	0	0	0	0	0
ADAM33	-0.541578	-0.642254	-0.691981	-0.640162	6.30276e-08	4.59449e-12	1.5341e-13	5.54635e-11	-1	-1	-1	-1	-1
ADAM9	0.553411	0.655797	0.677066	0.62814	2.78661e-08	1.12378e-12	8.07934e-13	1.63344e-10	1	1	1	1	1
ADAMTS1	-0.0160983	-0.11555	-0.278925	0.0607589	0.899117	0.301244	0.0111495	0.637407	0	0	0	0	0
ADAMTS10	-0.470398	-0.6102	-0.665265	-0.579989	4.78541e-06	9.91632e-11	2.80569e-12	8.23786e-09	0	-1	-1	-1	0
ADAMTS13	-0.5107	-0.503575	-0.512447	-0.649232	4.65914e-07	3.28998e-07	5.23758e-07	2.35737e-11	-1	-1	-1	-1	-1
ADAMTS14	0.0661378	0.0350658	0.0628511	0.218935	0.583829	0.765976	0.600743	0.0587346	0	0	0	0	0
ADAMTS16	0.110574	0.143656	0.106923	-0.0815067	0.344168	0.193588	0.360729	0.518568	0	0	0	0	0
ADAMTS18	0.0833178	0.197554	0.142836	0.261162	0.485519	0.0681046	0.21449	0.0216745	0	0	0	0	0
ADAMTS19	0.145829	0.0052511	0.0416705	-0.147574	0.20443	0.965904	0.731836	0.21822	0	0	0	0	0
ADAMTS2	-0.276661	-0.325973	-0.486417	-0.367732	0.0114929	0.0017726	2.39039e-06	0.000773097	0	0	0	0	0
ADAMTS3	0.631622	0.561464	0.703197	0.247052	4.9236e-11	5.77268e-09	4.14096e-14	0.0308298	1	1	1	0	0
ADAMTS4	0.253793	0.194089	0.0804092	0.383149	0.0212272	0.0734254	0.49829	0.000427113	0	0	0	0	0
ADAMTS6	0.0665494	-0.0889586	-0.108028	-0.228367	0.581442	0.432268	0.355687	0.0476444	0	0	0	0	0
ADAMTS8	0.278963	0.27779	0.418924	0.233794	0.0107646	0.00860391	7.05708e-05	0.0421821	0	0	0	0	0
ADAMTS9	-0.0447453	-0.139912	-0.246019	0.00994038	0.715155	0.20614	0.0266492	0.944	0	0	0	0	0
ADAMTS9-AS2	-0.380895	-0.355207	-0.374385	-0.402498	0.000320573	0.000592393	0.000460041	0.000195043	0	0	0	0	0
ADAMTSL2	-0.477366	-0.36427	-0.469914	-0.336452	3.26702e-06	0.00041249	5.8604e-06	0.00235038	0	0	0	0	0
ADAMTSL3	-0.182287	0.00684949	-0.256933	0.118728	0.106823	0.955175	0.0202119	0.331823	0	0	0	0	0
ADAP1	-0.13789	0.111364	0.0632142	0.00287779	0.231877	0.319992	0.598662	0.984559	0	0	0	0	0
ADAP2	-0.243462	-0.460008	-0.517648	-0.117198	0.0276464	4.35307e-06	3.80692e-07	0.338431	0	0	-1	0	0
ADAR	0.630052	0.753158	0.773722	0.424196	5.67516e-11	0	0	7.5658e-05	1	1	1	0	0
ADARB1	0.132567	0.563918	0.527692	-0.108321	0.251608	4.78048e-09	2.01794e-07	0.379335	0	1	1	0	0
ADARB2	-0.083793	-0.16427	-0.148434	0.133163	0.482643	0.134266	0.196121	0.270776	0	0	0	0	0
ADARB2-AS1	-0.121358	-0.339471	-0.186176	-0.0978665	0.296753	0.00108329	0.100075	0.431177	0	0	0	0	0
ADAT1	-0.509793	-0.339028	-0.388566	-0.296821	4.93017e-07	0.00110116	0.000260844	0.00816137	-1	0	0	0	0
ADAT2	0.522191	0.358834	0.422939	0.352251	2.26596e-07	0.000513023	5.88504e-05	0.0013566	1	0	0	0	0
ADCK1	0.381047	0.473472	0.389501	0.3796	0.000318578	2.03835e-06	0.000251053	0.00049088	0	0	0	0	0
ADCK2	0.610499	0.595851	0.549027	0.595896	3.21538e-10	3.51324e-10	4.93466e-08	2.43525e-09	1	1	1	1	1
ADCK3	0.518307	0.51745	0.556826	0.377098	2.90109e-07	1.33245e-07	2.88116e-08	0.000540698	1	1	1	0	0
ADCK4	-0.201864	-0.308823	-0.320876	-0.302606	0.0720027	0.00321154	0.00313051	0.00688583	0	0	0	0	0
ADCK5	-0.278866	-0.122298	-0.117393	-0.419243	0.0107931	0.272482	0.313097	9.47035e-05	0	0	0	0	0
ADCY1	0.0236088	0.487443	0.490911	-0.208	0.850955	8.96077e-07	1.85422e-06	0.0739157	0	0	0	0	0
ADCY10P1	-0.488286	-0.504812	-0.446226	0.0738825	1.76361e-06	3.04057e-07	1.95343e-05	0.560774	0	-1	0	0	0
ADCY2	0.0681674	-0.341626	-0.320327	-0.316422	0.571825	0.000998971	0.00318622	0.00451658	0	0	0	0	0
ADCY3	0.128427	0.039938	0.0444307	-0.108934	0.267498	0.73379	0.714172	0.376573	0	0	0	0	0
ADCY5	-0.529885	-0.439018	-0.453414	-0.381367	1.3745e-07	1.33911e-05	1.36912e-05	0.000458001	-1	0	0	0	0
ADCY6	-0.417002	-0.481674	-0.453774	-0.492463	6.82575e-05	1.26319e-06	1.34517e-05	2.43848e-06	0	0	0	0	0
ADCY7	-0.499752	-0.536261	-0.49175	-0.19244	9.03848e-07	3.68152e-08	1.76621e-06	0.100591	0	-1	0	0	0
ADCY8	0.116419	0.158615	0.0846467	-0.113021	0.318082	0.14884	0.474654	0.357127	0	0	0	0	0
ADCY9	-0.336195	-0.455848	-0.449707	-0.441971	0.00174176	5.46227e-06	1.64529e-05	3.32269e-05	0	0	0	0	0
ADCYAP1	0.426848	0.627884	0.698629	0.197735	4.33025e-05	1.90284e-11	7.14534e-14	0.090778	0	1	1	0	0
ADCYAP1R1	-0.321336	-0.695821	-0.701921	-0.571454	0.00289139	1.06882e-14	4.81614e-14	1.55071e-08	0	-1	-1	-1	0
ADD1	0.537426	0.339609	0.390792	0.457776	8.35563e-08	0.0010782	0.000237951	1.53368e-05	1	0	0	0	0
ADD2	0.688535	0.71554	0.733112	0.0105246	1.44743e-13	7.56273e-16	1.37341e-15	0.940343	1	1	1	0	0
ADD3	0.0451733	-0.488905	-0.460495	0.0101807	0.712242	8.20264e-07	9.57207e-06	0.942646	0	0	0	0	0
ADGRA1	-0.185901	-0.272139	-0.20633	-0.328066	0.099581	0.0101621	0.0665115	0.0031031	0	0	0	0	0
ADGRA2	-0.691732	-0.755467	-0.776462	-0.710114	1.00894e-13	0	0	3.33587e-14	-1	-1	-1	-1	-1
ADGRA3	-0.273143	-0.687067	-0.713639	-0.311011	0.0126779	3.23575e-14	1.13194e-14	0.00533009	0	-1	-1	0	0
ADGRB1	-0.60365	-0.643523	-0.69433	-0.569492	5.75342e-10	4.04222e-12	1.17386e-13	1.78113e-08	-1	-1	-1	-1	-1
ADGRB2	-0.331813	-0.344799	-0.364786	-0.470239	0.00202909	0.000885976	0.000664837	8.12517e-06	0	0	0	0	0
ADGRB3	0.641267	0.73876	0.77689	0.088312	1.98775e-11	0	0	0.481396	1	1	1	0	0
ADGRD1	-0.575181	-0.677162	-0.668353	-0.58015	5.59336e-09	1.03795e-13	2.0378e-12	8.13944e-09	-1	-1	-1	-1	-1
ADGRE2	-0.0270782	-0.124682	-0.283885	0.0712535	0.828562	0.262948	0.0096951	0.57625	0	0	0	0	0
ADGRE5	-0.00496384	0.0347434	-0.172979	0.223436	0.970357	0.768085	0.128492	0.0531938	0	0	0	0	0
ADGRF5	-0.667361	-0.618885	-0.521463	-0.55986	1.45259e-12	4.47346e-11	2.99507e-07	3.54885e-08	-1	-1	-1	-1	-1
ADGRF5P1	0.179221	0.155865	0.173593	0.0770205	0.113258	0.156372	0.127071	0.543503	0	0	0	0	0
ADGRG1	-0.603469	-0.699288	-0.765839	-0.565797	5.83837e-10	6.8014e-15	0	2.3197e-08	-1	-1	-1	-1	-1
ADGRL1	-0.46241	-0.5426	-0.589397	-0.513128	7.31933e-06	2.3377e-08	2.58244e-09	7.29226e-07	0	-1	-1	-1	0
ADGRL2	0.412238	0.671558	0.626857	-0.0586257	8.46691e-05	1.97735e-13	1.11999e-10	0.650365	0	1	1	0	0
ADGRL3	0.505401	0.601849	0.574894	-0.0747056	6.44007e-07	2.08332e-10	7.8167e-09	0.556152	1	1	1	0	0
ADGRL4	-0.619473	-0.680331	-0.743068	-0.480645	1.46498e-10	7.18145e-14	0	4.66887e-06	-1	-1	-1	0	0
ADGRV1	-0.155007	-0.699228	-0.690287	-0.447214	0.175327	6.8014e-15	1.85744e-13	2.5887e-05	0	-1	-1	0	0
ADH1B	-0.131785	-0.21135	-0.278249	-0.198518	0.254529	0.0500253	0.0113601	0.0893622	0	0	0	0	0
ADH5	0.728918	0.635611	0.663279	0.644933	0	8.92643e-12	3.43536e-12	3.5414e-11	1	1	1	1	1
ADH5P3	-0.222085	-0.321794	-0.311179	-0.325694	0.0460653	0.00205666	0.00427121	0.00335128	0	0	0	0	0
ADHFE1	0.180451	-0.0495859	-0.121353	0.175943	0.110593	0.670543	0.295992	0.135961	0	0	0	0	0
ADI1	0.474538	-0.305123	-0.253146	0.274372	3.8201e-06	0.003631	0.0222767	0.0153066	0	0	0	0	0
ADIPOR1	0.672901	0.433582	0.457721	0.639542	8.09106e-13	1.76658e-05	1.10333e-05	5.86976e-11	1	0	0	1	0
ADIPOR2	-0.170299	-0.313508	-0.345429	0.248892	0.133762	0.00273986	0.00135325	0.0294847	0	0	0	0	0
ADIRF	-0.0129714	-0.353225	-0.380696	-0.237657	0.919611	0.000640159	0.000358626	0.0385463	0	0	0	0	0
ADK	0.715094	0.777778	0.810619	0.608844	5.96357e-15	0	0	8.57461e-10	1	1	1	1	1
ADM	-0.00696566	-0.181756	-0.166342	0.0892975	0.958539	0.0951538	0.144666	0.475751	0	0	0	0	0
ADNP	0.245186	0.00136271	0.0165688	0.282518	0.0264733	0.991437	0.893788	0.0122849	0	0	0	0	0
ADNP-AS1	0.0681738	0.101535	0.192442	0.244247	0.571814	0.367305	0.08843	0.0329899	0	0	0	0	0
ADNP2	0.247952	0.402609	0.341788	0.480905	0.0246611	7.88571e-05	0.00153966	4.60525e-06	0	0	0	0	0
ADO	0.551435	0.715076	0.818247	0.71041	3.19955e-08	7.56273e-16	0	3.33587e-14	1	1	1	1	1
ADORA1	0.144265	0.233688	0.190766	0.380515	0.209761	0.029136	0.0914379	0.000473432	0	0	0	0	0
ADORA2B	0.0827922	-0.573991	-0.60145	-0.457279	0.488448	2.16377e-09	9.81449e-10	1.57175e-05	0	-1	-1	0	0
ADORA3	0.151844	-0.149981	-0.290296	0.151286	0.185044	0.173772	0.00804991	0.206108	0	0	0	0	0
ADPGK	0.64908	0.724171	0.672391	0.630772	9.28586e-12	0	1.33137e-12	1.28367e-10	1	1	1	1	1
ADPRHL1	-0.164581	0.419688	0.547004	-0.0835797	0.148297	3.51924e-05	5.66159e-08	0.506868	0	0	1	0	0
ADPRHL2	0.415113	0.554452	0.574334	0.547916	7.43189e-05	9.79746e-09	8.15438e-09	8.00524e-08	0	1	1	1	0
ADPRM	0.31526	0.365842	0.452011	0.437708	0.00353124	0.000387221	1.46908e-05	4.0594e-05	0	0	0	0	0
ADRA1A	-0.205286	-0.724675	-0.758922	-0.521503	0.0669205	0	0	4.37668e-07	0	-1	-1	-1	0
ADRA1B	-0.267062	-0.19582	-0.0616258	-0.235926	0.0149719	0.0707058	0.608207	0.0401329	0	0	0	0	0
ADRA1D	0.299701	0.299207	0.372001	-0.0173314	0.00578457	0.00441071	0.00050482	0.899336	0	0	0	0	0
ADRB1	-0.239167	-0.110279	-0.065204	-0.2623	0.030716	0.324943	0.586643	0.0210413	0	0	0	0	0
ADRB2	-0.203576	-0.531875	-0.594749	0.0170946	0.0694073	5.01018e-08	1.68832e-09	0.900687	0	-1	-1	0	0
ADRBK1	-0.217604	0.18588	0.1329	-0.294999	0.0509493	0.0874185	0.250106	0.00859439	0	0	0	0	0
ADRBK2	0.683291	0.821932	0.832344	0.161149	2.61097e-13	0	0	0.175301	1	1	1	0	0
ADRM1	0.370618	0.434478	0.421933	0.301577	0.000484134	1.68759e-05	6.15785e-05	0.00710078	0	0	0	0	0
ADSL	0.529096	0.615479	0.670132	0.533591	1.44652e-07	6.12942e-11	1.68911e-12	2.04572e-07	1	1	1	1	1
ADSS	0.728549	0.875553	0.854941	0.74686	1.31544e-15	0	0	0	1	1	1	1	1
ADSSL1	0.200296	0.093671	0.0839866	0.39358	0.0743642	0.407012	0.478405	0.000281855	0	0	0	0	0
ADTRP	-0.00501933	0.263068	0.438581	0.0982647	0.97008	0.0132158	2.83137e-05	0.429198	0	0	0	0	0
AEBP1	-0.490729	-0.516789	-0.548688	-0.417854	1.53024e-06	1.39303e-07	5.04996e-08	0.000100813	0	-1	-1	0	0
AEBP2	0.000828785	0.294785	0.294972	-0.130805	0.994861	0.00508594	0.00701498	0.280365	0	0	0	0	0
AEN	-0.185391	-0.397888	-0.436716	-0.169322	0.100578	9.7676e-05	3.09703e-05	0.152778	0	0	0	0	0
AES	0.287001	0.501719	0.400528	-0.186055	0.00851601	3.70393e-07	0.000158327	0.113239	0	1	0	0	0
AFAP1	0.0667141	0.275466	0.204993	-0.15635	0.580435	0.0092205	0.0684207	0.189837	0	0	0	0	0
AFAP1L1	-0.622995	-0.631633	-0.668288	-0.637429	1.07519e-10	1.32298e-11	2.05179e-12	7.08708e-11	-1	-1	-1	-1	-1
AFAP1L2	-0.709333	-0.67538	-0.634629	-0.707655	1.23929e-14	1.27778e-13	5.5383e-11	4.61613e-14	-1	-1	-1	-1	-1
AFF1	-0.607526	-0.707237	-0.803357	-0.440879	4.14214e-10	2.83245e-15	0	3.49558e-05	-1	-1	-1	0	0
AFF2	0.416182	0.62923	0.666132	0.0603456	7.08323e-05	1.67252e-11	2.56343e-12	0.64001	0	1	1	0	0
AFF3	0.21164	-0.0670511	0.0766623	-0.158299	0.0582751	0.558912	0.519905	0.183853	0	0	0	0	0
AFF4	0.528022	0.136798	0.209716	0.417646	1.55201e-07	0.216966	0.0618504	0.000101776	1	0	0	0	0
AFG3L1P	-0.599198	-0.58475	-0.637753	-0.359714	8.30188e-10	8.99438e-10	4.14473e-11	0.00103612	-1	-1	-1	0	0
AFG3L2	0.861594	0.876749	0.900353	0.693076	0	0	0	2.48577e-13	1	1	1	1	1
AFG3L2P1	-0.134766	-0.0178727	0.0881257	-0.00322297	0.243484	0.880849	0.455851	0.982565	0	0	0	0	0
AFMID	0.237659	0.109403	0.240222	0.359615	0.0318766	0.329115	0.0307516	0.00103999	0	0	0	0	0
AFTPH	0.701104	0.797321	0.822999	0.607454	3.3506e-14	0	0	9.61404e-10	1	1	1	1	1
AGA	0.548432	0.514973	0.486832	0.623317	3.93929e-08	1.56887e-07	2.33553e-06	2.50758e-10	1	1	0	1	0
AGAP1	-0.621592	-0.507489	-0.570063	-0.292027	1.21843e-10	2.563e-07	1.11571e-08	0.00937774	-1	-1	-1	0	0
AGAP1-IT1	-0.741138	-0.537727	-0.573272	-0.0875583	0	3.32226e-08	8.81389e-09	0.48533	-1	-1	-1	0	0
AGAP2	-0.486603	-0.496781	-0.540669	-0.419882	1.94468e-06	5.04948e-07	8.67474e-08	9.21147e-05	0	0	-1	0	0
AGAP3	-0.310461	-0.368505	-0.406909	-0.47584	0.00413009	0.00034804	0.000120244	6.03603e-06	0	0	0	0	0
AGAP4	-0.335823	-0.25583	-0.262607	-0.0801065	0.00176433	0.0161935	0.0174227	0.526425	0	0	0	0	0
AGAP5	-0.432846	-0.180251	-0.284422	-0.0422428	3.26304e-05	0.098101	0.00954711	0.747633	0	0	0	0	0
AGAP6	0.00110501	0.135659	0.0403617	-0.00176109	0.993271	0.220937	0.740073	0.990703	0	0	0	0	0
AGAP7P	0.0803484	0.0549778	0.152507	0.106959	0.502049	0.635195	0.183532	0.385922	0	0	0	0	0
AGAP9	-0.0633344	-0.110887	-0.0977336	-0.0308935	0.600732	0.322219	0.405417	0.817728	0	0	0	0	0
AGBL3	0.294657	0.467831	0.334638	0.339601	0.00676526	2.81019e-06	0.00197341	0.00211367	0	0	0	0	0
AGBL4	0.683002	0.691086	0.754788	0.0677605	2.69754e-13	1.94677e-14	0	0.596593	1	1	1	0	0
AGBL5	-0.253548	-0.0366129	0.12668	-0.000483122	0.0213636	0.755569	0.274142	0.997701	0	0	0	0	0
AGFG1	0.482076	0.459586	0.510869	0.608158	2.51961e-06	4.45753e-06	5.76602e-07	9.09244e-10	0	0	1	1	0
AGFG2	-0.467741	-0.607876	-0.62663	-0.536464	5.52167e-06	1.22132e-10	1.14237e-10	1.70104e-07	0	-1	-1	-1	0
AGGF1	0.744932	0.795383	0.811674	0.671522	0	0	0	2.55284e-12	1	1	1	1	1
AGK	0.788174	0.848408	0.897594	0.672775	0	0	0	2.24023e-12	1	1	1	1	1
AGKP1	0.121764	0.00456429	0.0704149	-0.118809	0.294994	0.9704	0.555813	0.331469	0	0	0	0	0
AGL	0.473937	0.527568	0.472125	0.438321	3.95051e-06	6.74399e-08	5.20752e-06	3.94805e-05	0	1	0	0	0
AGMAT	-0.361838	-0.162949	-0.153282	-0.406144	0.000680767	0.137579	0.181157	0.000167537	0	0	0	0	0
AGMO	-0.154937	-0.291457	-0.372665	0.156865	0.175537	0.00565386	0.000491994	0.188216	0	0	0	0	0
AGO1	-0.510884	-0.360563	-0.339774	-0.546924	4.60669e-07	0.000479029	0.00165273	8.56084e-08	-1	0	0	-1	0
AGO2	-0.448965	-0.529726	-0.591767	-0.0295746	1.4715e-05	5.81486e-08	2.1406e-09	0.826404	0	-1	-1	0	0
AGO3	-0.365731	-0.270943	-0.230305	0.315522	0.000586049	0.0105207	0.0389638	0.00464267	0	0	0	0	0
AGO4	0.081331	0.0541301	-0.0484743	0.022811	0.496315	0.640334	0.688837	0.867048	0	0	0	0	0
AGPAT1	-0.0404082	-0.0680262	0.0158267	-0.27616	0.743502	0.553252	0.898455	0.0146072	0	0	0	0	0
AGPAT2	-0.176906	-0.238609	-0.274079	-0.429999	0.118382	0.0256731	0.0127698	5.81656e-05	0	0	0	0	0
AGPAT3	-0.423828	-0.129735	-0.0664353	-0.432531	4.98965e-05	0.243131	0.579301	5.1791e-05	0	0	0	0	0
AGPAT4	0.638372	0.637414	0.654719	0.560508	2.62399e-11	7.46894e-12	8.10632e-12	3.3875e-08	1	1	1	1	1
AGPAT4-IT1	-0.276004	-0.142276	-0.0932248	0.295392	0.0117092	0.198075	0.428592	0.00850454	0	0	0	0	0
AGPAT5	0.342426	0.172305	0.228798	0.350021	0.0013959	0.115028	0.0403686	0.0014691	0	0	0	0	0
AGPAT6	0.361389	0.53469	0.573412	0.393166	0.0006926	4.11477e-08	8.72148e-09	0.000286748	0	1	1	0	0
AGPAT9	0.215556	0.753022	0.764727	0.304781	0.0533808	0	0	0.00645085	0	1	1	0	0
AGPS	0.743372	0.743272	0.751805	0.662491	0	0	0	6.51628e-12	1	1	1	1	1
AGRN	-0.532558	-0.492353	-0.556627	-0.586588	1.15207e-07	6.64025e-07	2.92237e-08	5.0337e-09	-1	0	-1	-1	0
AGT	0.228273	-0.294675	-0.25603	0.117497	0.0398736	0.00510392	0.0206931	0.337037	0	0	0	0	0
AGTPBP1	0.50929	0.633032	0.516481	0.1234	5.09032e-07	1.15239e-11	4.08864e-07	0.311118	1	1	1	0	0
AGTRAP	-0.128916	-0.411767	-0.400348	0.106189	0.26562	5.13477e-05	0.000159515	0.389573	0	0	0	0	0
AHCTF1	0.479879	0.293179	0.270783	0.290498	2.84528e-06	0.00535543	0.0139951	0.00980323	0	0	0	0	0
AHCY	0.515219	0.442437	0.565138	0.431396	3.52535e-07	1.11966e-05	1.59395e-08	5.45271e-05	1	0	1	0	0
AHCYL1	0.278263	-0.225968	-0.187863	0.122313	0.0109788	0.0353479	0.0967696	0.315987	0	0	0	0	0
AHCYL2	0.0217672	-0.643961	-0.624799	-0.398622	0.862814	3.8687e-12	1.34623e-10	0.000229308	0	-1	-1	0	0
AHDC1	-0.709418	-0.708218	-0.772094	-0.720882	1.23929e-14	2.1558e-15	0	1.04399e-14	-1	-1	-1	-1	-1
AHI1	0.551829	0.558225	0.485893	0.185573	3.11714e-08	7.3856e-09	2.46035e-06	0.114255	1	1	0	0	0
AHNAK	-0.404617	-0.716112	-0.754255	-0.367126	0.000118527	7.56273e-16	0	0.000790085	0	-1	-1	0	0
AHNAK2	0.468284	0.679804	0.741391	0.0303748	5.36553e-06	7.63784e-14	0	0.821199	0	1	1	0	0
AHR	0.362068	0.445018	0.422539	0.461469	0.000675107	9.77086e-06	5.99097e-05	1.27561e-05	0	0	0	0	0
AHSA1	0.256729	0.375828	0.439032	0.363163	0.0196966	0.000256031	2.77163e-05	0.000913947	0	0	0	0	0
AHSA2	-0.352691	-0.338631	-0.386074	0.125607	0.000959678	0.00111686	0.000288507	0.301755	0	0	0	0	0
AIDA	-0.139524	-0.220332	-0.177528	0.24428	0.226021	0.0404884	0.118056	0.0329666	0	0	0	0	0
AIF1	0.527683	0.387893	0.276798	0.488985	1.58651e-07	0.000152532	0.0118237	2.95406e-06	1	0	0	0	0
AIF1L	-0.190294	-0.261329	-0.345661	0.0649684	0.0912866	0.0138739	0.00134234	0.612083	0	0	0	0	0
AIFM1	0.651693	0.688143	0.717041	0.690012	7.18347e-12	2.80832e-14	7.67511e-15	3.54196e-13	1	1	1	1	1
AIFM2	-0.465993	-0.594276	-0.51645	-0.553759	6.05831e-06	4.02038e-10	4.09577e-07	5.4018e-08	0	-1	-1	-1	0
AIFM3	-0.429906	-0.440644	-0.545124	-0.600831	3.7531e-05	1.23064e-05	6.41916e-08	1.63977e-09	0	0	-1	-1	0
AIG1	0.625637	0.670065	0.724042	0.656424	8.48071e-11	2.34395e-13	2.67958e-15	1.18828e-11	1	1	1	1	1
AIMP1	0.443535	0.409554	0.36164	0.453539	1.93336e-05	5.70602e-05	0.000748517	1.88921e-05	0	0	0	0	0
AIMP1P1	0.260668	0.284797	0.202611	-0.0236889	0.0177666	0.00696095	0.0718806	0.862255	0	0	0	0	0
AIMP2	0.552905	0.454087	0.350146	0.426295	2.88863e-08	6.01697e-06	0.00114325	6.87974e-05	1	0	0	0	0
AIP	0.277424	0.410565	0.422693	0.329678	0.0112472	5.43883e-05	5.95128e-05	0.00294201	0	0	0	0	0
AIPL1	-0.413587	-0.448947	-0.557632	-0.493873	7.96892e-05	7.94047e-06	2.72216e-08	2.25252e-06	0	0	-1	0	0
AJAP1	0.125393	0.0204479	0.0921808	-0.181815	0.279648	0.863443	0.434229	0.122292	0	0	0	0	0
AK1	0.185063	0.34371	0.432374	0.139906	0.10121	0.00092318	3.80034e-05	0.245246	0	0	0	0	0
AK2	0.231877	0.180186	0.0972558	0.404727	0.0366396	0.0982316	0.407722	0.000177929	0	0	0	0	0
AK3	0.211652	-0.314953	-0.372613	0.243307	0.0582634	0.00260715	0.000492953	0.0337428	0	0	0	0	0
AK3P2	-0.324405	-0.270644	-0.425212	-0.224308	0.00260874	0.0106114	5.29924e-05	0.0521782	0	0	0	0	0
AK3P3	-0.0804359	-0.0262275	-0.161533	0.0359206	0.501601	0.824919	0.157381	0.786865	0	0	0	0	0
AK3P5	-0.530716	-0.421128	-0.482149	-0.415989	1.30053e-07	3.28272e-05	3.02761e-06	0.000109344	-1	0	0	0	0
AK3P6	-0.291959	-0.174974	-0.0769934	-0.180787	0.00733936	0.109053	0.518113	0.124639	0	0	0	0	0
AK4	0.271541	-0.562865	-0.572968	-0.300436	0.0132581	5.18817e-09	9.00995e-09	0.00733632	0	-1	-1	0	0
AK4P1	-0.323118	-0.273225	-0.231957	0.00246169	0.00272459	0.00984594	0.0374626	0.987012	0	0	0	0	0
AK5	0.777565	0.869313	0.902702	0.663701	0	0	0	5.77658e-12	1	1	1	1	1
AK6	0.77603	0.813757	0.794986	0.810542	0	0	0	0	1	1	1	1	1
AK7	0.0751003	0.0993188	0.0891401	0.117135	0.531919	0.378411	0.450391	0.338718	0	0	0	0	0
AK9	0.141176	0.469924	0.351252	0.313055	0.220395	2.49532e-06	0.00109838	0.00500222	0	0	0	0	0
AKAP1	0.428194	0.513496	0.340812	0.00908162	4.06339e-05	1.73063e-07	0.001594	0.948513	0	1	0	0	0
AKAP10	0.58649	0.584143	0.605589	0.48555	2.32464e-09	9.44975e-10	6.96589e-10	3.57465e-06	1	1	1	0	0
AKAP11	0.815238	0.82743	0.846909	0.463726	0	0	0	1.13749e-05	1	1	1	0	0
AKAP12	0.368224	0.674907	0.659578	-0.0251134	0.000531757	1.34579e-13	5.00723e-12	0.853862	0	1	1	0	0
AKAP13	0.166014	0.131972	0.154882	-0.154208	0.144563	0.234688	0.176371	0.196514	0	0	0	0	0
AKAP17A	-0.124159	0.126094	-0.072418	0.0677215	0.284829	0.257435	0.544141	0.596799	0	0	0	0	0
AKAP2	-0.269797	-0.235169	-0.244563	-0.3071	0.013894	0.0280544	0.0276294	0.0060146	0	0	0	0	0
AKAP5	0.652975	0.750132	0.807873	0.140288	6.32738e-12	0	0	0.243911	1	1	1	0	0
AKAP6	0.834659	0.883917	0.895494	0.744043	0	0	0	0	1	1	1	1	1
AKAP7	0.403918	0.214155	0.0753491	-0.234506	0.000122211	0.0468209	0.527466	0.0414691	0	0	0	0	0
AKAP8	0.244423	0.430006	0.33241	0.342517	0.0269876	2.11684e-05	0.00212927	0.00191082	0	0	0	0	0
AKAP8L	0.167346	0.129096	0.116751	0.170003	0.141155	0.245573	0.315957	0.150963	0	0	0	0	0
AKAP9	0.488106	0.305868	0.277593	0.218958	1.78139e-06	0.00354374	0.0115698	0.0587135	0	0	0	0	0
AKIP1	-0.168643	-0.190208	-0.154554	-0.283054	0.137835	0.0798301	0.177291	0.0121023	0	0	0	0	0
AKIRIN1	0.427086	0.363368	0.372686	0.500941	4.28373e-05	0.000427909	0.000491674	1.50221e-06	0	0	0	1	0
AKIRIN2	0.689993	0.554209	0.5842	0.597746	1.22213e-13	9.97872e-09	3.86276e-09	2.09875e-09	1	1	1	1	1
AKNA	-0.539117	-0.714507	-0.712407	-0.513712	7.45702e-08	1.44989e-15	1.36936e-14	7.05293e-07	-1	-1	-1	-1	-1
AKR1A1	0.627617	0.744817	0.73008	0.672398	7.09057e-11	0	1.37341e-15	2.32994e-12	1	1	1	1	1
AKR1B1	0.74456	0.737334	0.711755	0.578469	0	0	1.48821e-14	9.25603e-09	1	1	1	1	1
AKR1B15	-0.243833	-0.398718	-0.313807	-0.0100709	0.0273964	9.40322e-05	0.00392775	0.943193	0	0	0	0	0
AKR1B1P6	-0.2952	-0.345651	-0.438336	-0.333902	0.0066533	0.000857577	2.8654e-05	0.00255719	0	0	0	0	0
AKR1C1	-0.00502623	-0.0667566	0.00372959	-0.00961727	0.970077	0.560657	0.976786	0.945581	0	0	0	0	0
AKR1C2	-0.1239	-0.216153	-0.0841534	-0.0622112	0.285886	0.0446729	0.477462	0.628675	0	0	0	0	0
AKR1C3	-0.275633	-0.569299	-0.576209	-0.235394	0.011829	3.13855e-09	7.09259e-09	0.0406289	0	-1	-1	0	0
AKR1E2	-0.31882	-0.233006	-0.237404	-0.492942	0.00314305	0.029632	0.0329279	2.37382e-06	0	0	0	0	0
AKR7A2	0.0280662	-0.133638	-0.142666	-0.0449511	0.822439	0.22842	0.215056	0.731573	0	0	0	0	0
AKR7A2P1	-0.457762	-0.494892	-0.309957	-0.174212	9.34338e-06	5.68011e-07	0.00443981	0.140201	0	0	0	0	0
AKR7A3	-0.12495	-0.287895	-0.223295	-0.163272	0.281569	0.00632571	0.0458269	0.169336	0	0	0	0	0
AKT1	-0.107815	-0.0378074	-0.282496	-0.412854	0.357209	0.747682	0.0100879	0.00012543	0	0	0	0	0
AKT1S1	-0.48006	-0.484184	-0.572034	-0.26408	2.81738e-06	1.0885e-06	9.65167e-09	0.0201279	0	0	-1	0	0
AKT2	-0.617249	-0.695373	-0.752284	-0.551367	1.78436e-10	1.19568e-14	0	6.35251e-08	-1	-1	-1	-1	-1
AKT3	0.473511	0.728569	0.721118	0.10077	4.04473e-06	0	4.59696e-15	0.416352	0	1	1	0	0
AKTIP	0.724007	0.641522	0.733786	0.687407	2.48975e-15	4.9538e-12	7.1499e-16	4.68972e-13	1	1	1	1	1
ALAD	-0.154565	-0.315133	-0.204753	-0.0370599	0.176661	0.00259135	0.0687695	0.780239	0	0	0	0	0
ALAS1	0.801059	0.862557	0.871141	0.637957	0	0	0	6.7552e-11	1	1	1	1	1
ALCAM	0.58021	0.54588	0.597628	0.549646	3.80154e-09	1.84178e-08	1.3401e-09	7.1088e-08	1	1	1	1	1
ALDH18A1	0.51588	0.598622	0.556907	0.183993	3.38026e-07	2.76068e-10	2.86542e-08	0.117529	1	1	1	0	0
ALDH1A1	0.221373	0.0590627	0.120052	0.174835	0.0468133	0.60932	0.301686	0.138661	0	0	0	0	0
ALDH1A2	0.263537	0.622289	0.601789	0.460923	0.0164434	3.24483e-11	9.54154e-10	1.31093e-05	0	1	1	0	0
ALDH1A3	-0.217954	0.565376	0.57401	0.117355	0.0505862	4.27357e-09	8.34356e-09	0.337716	0	1	1	0	0
ALDH1B1	0.367987	0.748172	0.637981	0.468525	0.000536681	0	4.05882e-11	8.88084e-06	0	1	1	0	0
ALDH1L1	0.0798023	-0.30651	-0.372361	-0.29919	0.505031	0.00346958	0.000497857	0.00760822	0	0	0	0	0
ALDH1L2	0.0389546	0.166226	0.148813	-0.044951	0.752836	0.12934	0.194879	0.731573	0	0	0	0	0
ALDH2	0.267721	-0.250746	-0.296667	-0.0682652	0.0147021	0.0185883	0.00667424	0.593551	0	0	0	0	0
ALDH3A2	0.626335	0.408727	0.5665	0.556633	7.95923e-11	5.9319e-05	1.44532e-08	4.44546e-08	1	0	1	1	0
ALDH3B1	-0.39947	-0.559714	-0.643324	-0.233716	0.000147878	6.60009e-09	2.45852e-11	0.0422517	0	-1	-1	0	0
ALDH4A1	-0.3857	-0.579724	-0.564025	-0.611109	0.000264055	1.35864e-09	1.72891e-08	7.10111e-10	0	-1	-1	-1	0
ALDH5A1	0.565476	0.435316	0.430071	-0.00912789	1.15885e-08	1.61729e-05	4.23983e-05	0.948257	1	0	0	0	0
ALDH6A1	-0.0617015	-0.618679	-0.645441	-0.0755121	0.610829	4.5604e-11	2.00701e-11	0.551818	0	-1	-1	0	0
ALDH7A1	0.0764617	-0.365292	-0.325015	0.215913	0.523956	0.000395839	0.00272989	0.0626592	0	0	0	0	0
ALDH7A1P1	-0.340496	-0.354424	-0.272846	-0.385335	0.00149438	0.000610753	0.0132173	0.000392349	0	0	0	0	0
ALDH8A1	0.163273	0.148624	0.21411	0.114502	0.151763	0.177874	0.0561929	0.350601	0	0	0	0	0
ALDH9A1	0.514534	0.0387233	0.0635129	0.489147	3.67589e-07	0.741731	0.596788	2.92874e-06	1	0	0	0	0
ALDOA	0.679204	0.776634	0.802091	0.284601	4.09609e-13	0	0	0.011592	1	1	1	0	0
ALDOB	-0.241054	-0.102222	-0.153403	-0.115331	0.0293249	0.363802	0.180769	0.34682	0	0	0	0	0
ALDOC	0.659665	0.550622	0.540346	0.267259	3.23943e-12	1.30387e-08	8.86345e-08	0.018522	1	1	1	0	0
ALG1	0.197408	0.137785	0.0267002	-0.110996	0.0789109	0.213493	0.828925	0.36667	0	0	0	0	0
ALG10	-0.0908537	-0.0935699	0.108455	0.21394	0.443572	0.407459	0.353721	0.0653272	0	0	0	0	0
ALG10B	0.177444	-0.0308606	0.00332344	0.189936	0.117184	0.793447	0.979387	0.105407	0	0	0	0	0
ALG11	0.381451	0.367384	0.448709	0.478115	0.00031345	0.000364327	1.7289e-05	5.34229e-06	0	0	0	0	0
ALG12	-0.403789	-0.473715	-0.40724	-0.120422	0.000122892	2.00987e-06	0.00011854	0.324387	0	0	0	0	0
ALG13	-0.0254825	0.246541	0.311861	0.413706	0.838749	0.0208325	0.00417941	0.000120831	0	0	0	0	0
ALG14	0.563997	0.383221	0.500298	0.39314	1.29131e-08	0.000186709	1.07964e-06	0.000286999	1	0	1	0	0
ALG1L12P	-0.480901	-0.470379	-0.431234	-0.410651	2.68935e-06	2.43297e-06	4.01004e-05	0.000138242	0	0	0	0	0
ALG1L6P	-0.432946	-0.463351	-0.398673	-0.469467	3.24693e-05	3.61853e-06	0.000171413	8.45713e-06	0	0	0	0	0
ALG1L7P	-0.45886	-0.425241	-0.506115	-0.54977	8.82245e-06	2.68226e-05	7.6782e-07	7.05572e-08	0	0	-1	-1	0
ALG1L8P	-0.575585	-0.558711	-0.646629	-0.461643	5.42098e-09	7.1173e-09	1.79315e-11	1.26438e-05	-1	-1	-1	0	0
ALG1L9P	-0.202315	-0.112589	-0.0542633	-0.126709	0.0713383	0.314212	0.653054	0.297215	0	0	0	0	0
ALG2	0.541805	0.644327	0.700082	0.643022	6.20315e-08	3.72808e-12	5.98044e-14	4.25598e-11	1	1	1	1	1
ALG3	0.027026	0.01889	0.0357162	0.055911	0.828811	0.874009	0.770653	0.666266	0	0	0	0	0
ALG5	0.63246	0.630024	0.5829	0.547474	4.56652e-11	1.54855e-11	4.26972e-09	8.25838e-08	1	1	1	1	1
ALG6	0.395234	0.503648	0.476043	0.632807	0.00017732	3.27453e-07	4.21581e-06	1.07633e-10	0	1	0	1	0
ALG8	0.55162	0.555383	0.609413	0.801891	3.15986e-08	9.13691e-09	5.06228e-10	0	1	1	1	1	1
ALG9	0.701659	0.774472	0.759438	0.769496	3.16134e-14	0	0	0	1	1	1	1	1
ALKBH1	0.475372	0.418743	0.481628	0.525627	3.64837e-06	3.68293e-05	3.11595e-06	3.38374e-07	0	0	0	1	0
ALKBH2	0.599367	0.602247	0.649751	0.594009	8.19598e-10	2.01208e-10	1.32464e-11	2.8298e-09	1	1	1	1	1
ALKBH3	0.616439	0.671928	0.690828	0.659939	1.91691e-10	1.90007e-13	1.74598e-13	8.42905e-12	1	1	1	1	1
ALKBH4	0.162761	0.0960152	0.0525526	-0.0420555	0.15317	0.394877	0.663432	0.748669	0	0	0	0	0
ALKBH5	0.180266	0.461222	0.417809	0.354652	0.111001	4.07079e-06	7.42019e-05	0.00124585	0	0	0	0	0
ALKBH6	0.6041	0.644897	0.60995	0.373435	5.53988e-10	3.51595e-12	4.83994e-10	0.000622911	1	1	1	0	0
ALKBH7	0.169573	0.206015	0.0978944	0.0618934	0.135542	0.0564548	0.404608	0.630684	0	0	0	0	0
ALKBH8	0.575161	0.690138	0.656998	0.473769	5.60127e-09	2.19036e-14	6.48328e-12	6.74207e-06	1	1	1	0	0
ALMS1	-0.47094	-0.457415	-0.514187	-0.327604	4.65119e-06	5.01316e-06	4.71297e-07	0.00315129	0	0	-1	0	0
ALMS1-IT1	0.148439	0.19757	0.281107	0.432413	0.195901	0.0680839	0.0104897	5.20517e-05	0	0	0	0	0
ALMS1P	-0.511849	-0.430044	-0.498614	-0.43133	4.34687e-07	2.11316e-05	1.19192e-06	5.46982e-05	-1	0	0	0	0
ALOX12-AS1	-0.163556	-0.267396	-0.0824038	0.2609	0.15104	0.0116575	0.486977	0.0218226	0	0	0	0	0
ALOX12P1	-0.629798	-0.492039	-0.577434	-0.302319	5.80775e-11	6.77168e-07	6.47791e-09	0.00694379	-1	0	-1	0	0
ALOX12P2	-0.222015	-0.241478	-0.29263	-0.315693	0.0461387	0.0238376	0.00751843	0.00461853	0	0	0	0	0
ALOX5	0.110764	-0.130012	-0.246635	0.0710211	0.343293	0.242059	0.0262386	0.577568	0	0	0	0	0
ALOX5AP	0.370433	0.118745	-0.0845806	0.313277	0.000487521	0.287442	0.475004	0.00496874	0	0	0	0	0
ALPK1	0.538004	-0.0184151	-0.202363	0.228109	8.04173e-08	0.877197	0.0722564	0.0479262	1	0	0	0	0
ALPL	-0.558986	-0.648045	-0.517025	-0.543663	1.86179e-08	2.54624e-12	3.95619e-07	1.06134e-07	-1	-1	-1	-1	-1
ALS2	0.689347	0.806671	0.814	0.374291	1.31972e-13	0	0	0.000602702	1	1	1	0	0
ALS2CL	-0.491011	-0.165324	-0.0154666	-0.321324	1.50588e-06	0.13157	0.900653	0.0038554	0	0	0	0	0
ALS2CR11	0.114048	-0.261464	-0.292948	0.0339706	0.328493	0.0138207	0.0074475	0.798927	0	0	0	0	0
ALS2CR12	-0.528231	-0.421303	-0.523013	-0.551292	1.53134e-07	3.25502e-05	2.71454e-07	6.38581e-08	-1	0	-1	-1	0
ALYREF	0.51476	0.547968	0.62293	0.460397	3.62557e-07	1.58261e-08	1.58926e-10	1.34565e-05	1	1	1	0	0
AMACR	0.61135	0.687505	0.703518	0.528042	2.98532e-10	3.05176e-14	3.9756e-14	2.90746e-07	1	1	1	1	1
AMBRA1	0.0757456	0.378528	0.424432	0.430295	0.528244	0.000228382	5.49445e-05	5.73892e-05	0	0	0	0	0
AMD1	0.649839	0.743981	0.83972	0.713116	8.63881e-12	0	0	2.43439e-14	1	1	1	1	1
AMDHD2	-0.128856	-0.0798615	-0.134315	-0.303031	0.26582	0.483666	0.244881	0.00679578	0	0	0	0	0
AMER1	-0.0263498	0.355017	0.265707	-0.25605	0.832988	0.000596794	0.0160442	0.0246596	0	0	0	0	0
AMER2	-0.0457753	-0.124175	-0.108323	0.264954	0.70863	0.264857	0.354283	0.0196779	0	0	0	0	0
AMER3	0.337982	0.474079	0.463107	-0.130892	0.00163416	1.96868e-06	8.36988e-06	0.280017	0	0	0	0	0
AMFR	0.557717	0.449049	0.473149	0.519319	2.04322e-08	7.90043e-06	4.93065e-06	5.01246e-07	1	0	0	1	0
AMIGO1	0.729953	0.776904	0.799491	0.0649569	0	0	0	0.612129	1	1	1	0	0
AMIGO2	-0.108183	0.315265	0.299432	0.138959	0.355548	0.00258008	0.00614043	0.248644	0	0	0	0	0
AMIGO3	-0.668499	-0.700161	-0.744174	-0.730562	1.29223e-12	6.8014e-15	0	2.8929e-15	-1	-1	-1	-1	-1
AMMECR1	0.196303	0.325857	0.215627	0.123411	0.0807125	0.00177961	0.0543296	0.311082	0	0	0	0	0
AMMECR1L	-0.32154	-0.22603	-0.322428	0.0134949	0.00287368	0.0352984	0.00297351	0.922896	0	0	0	0	0
AMMECR1LP1	0.23993	0.207198	0.350817	-0.0697453	0.0301524	0.0550025	0.00111544	0.585185	0	0	0	0	0
AMN1	0.832524	0.872738	0.883526	0.757453	0	0	0	0	1	1	1	1	1
AMOT	-0.480212	-0.774455	-0.716827	-0.657827	2.79373e-06	0	7.67511e-15	1.03424e-11	0	-1	-1	-1	0
AMOTL1	-0.0651301	-0.278658	-0.174877	-0.330377	0.589798	0.00838138	0.124108	0.00287588	0	0	0	0	0
AMOTL2	-0.131068	0.0170788	-0.00996862	0.335119	0.257178	0.886146	0.936089	0.00245805	0	0	0	0	0
AMPD2	0.424384	0.36457	0.254773	-0.147009	4.86177e-05	0.000407644	0.0213708	0.220088	0	0	0	0	0
AMPD3	-0.357871	-0.282296	-0.189758	0.165186	0.000792	0.007506	0.0932969	0.163936	0	0	0	0	0
AMPH	0.69745	0.822784	0.841352	0.150513	5.25653e-14	0	0	0.208502	1	1	1	0	0
AMT	-0.313697	-0.392755	-0.520214	-0.355008	0.00371443	0.000123109	3.24253e-07	0.00123028	0	0	-1	0	0
AMY2B	0.344054	0.458897	0.444867	0.243534	0.00131634	4.63107e-06	2.08619e-05	0.0335603	0	0	0	0	0
AMZ1	-0.662016	-0.563436	-0.637165	-0.590565	2.54133e-12	4.96399e-09	4.3786e-11	3.70797e-09	-1	-1	-1	-1	-1
AMZ2	0.691469	0.555454	0.553832	0.516848	1.03565e-13	9.0889e-09	3.53856e-08	5.82365e-07	1	1	1	1	1
AMZ2P1	0.757302	0.765617	0.796783	0.618883	0	0	0	3.67244e-10	1	1	1	1	1
ANAPC1	0.814784	0.862397	0.88193	0.810818	0	0	0	0	1	1	1	1	1
ANAPC10	0.667364	0.464236	0.616919	0.55731	1.45259e-12	3.44495e-06	2.6826e-10	4.24214e-08	1	0	1	1	0
ANAPC11	0.446366	0.386576	0.293035	0.177351	1.67901e-05	0.000161385	0.00742813	0.132663	0	0	0	0	0
ANAPC13	0.772493	0.836217	0.882457	0.752594	0	0	0	0	1	1	1	1	1
ANAPC15	0.6545	0.714512	0.74168	0.367908	5.44609e-12	1.44989e-15	0	0.000768068	1	1	1	0	0
ANAPC16	-0.443664	-0.599007	-0.651816	-0.295542	1.92169e-05	2.67093e-10	1.08225e-11	0.00846912	0	-1	-1	0	0
ANAPC2	0.0141356	-0.148674	-0.0357373	-0.210109	0.911926	0.17775	0.770538	0.0707564	0	0	0	0	0
ANAPC4	0.586431	0.640502	0.71612	0.676345	2.33417e-09	5.48692e-12	8.90096e-15	1.54418e-12	1	1	1	1	1
ANAPC5	0.779928	0.812248	0.835084	0.646933	0	0	0	2.93249e-11	1	1	1	1	1
ANAPC7	0.805953	0.842624	0.886299	0.812499	0	0	0	0	1	1	1	1	1
ANGEL1	0.328692	0.239726	0.205958	0.303603	0.00225502	0.0249434	0.0670262	0.00667917	0	0	0	0	0
ANGEL2	0.144656	-0.0852718	-0.0661276	0.0555616	0.208391	0.452625	0.581148	0.668269	0	0	0	0	0
ANGPT1	-0.0930698	0.00603704	0.0862892	0.227558	0.431938	0.960647	0.465672	0.0485056	0	0	0	0	0
ANGPT2	-0.339669	-0.437359	-0.53592	-0.229661	0.00153936	1.45757e-05	1.18791e-07	0.0462768	0	0	-1	0	0
ANGPTL1	0.215145	-0.212539	-0.206372	-0.0734218	0.0538601	0.0486411	0.0664527	0.563425	0	0	0	0	0
ANGPTL2	-0.302523	-0.426368	-0.4737	0.245656	0.00530215	2.53799e-05	4.78416e-06	0.0319138	0	0	0	0	0
ANGPTL4	-0.0950117	-0.168765	-0.194935	0.00971107	0.421911	0.123215	0.0841182	0.945117	0	0	0	0	0
ANK1	0.508234	0.488054	0.471926	-0.0528396	5.4291e-07	8.6374e-07	5.26391e-06	0.684856	1	0	0	0	0
ANK2	0.814448	0.862324	0.892272	0.594169	0	0	0	2.79471e-09	1	1	1	1	1
ANK3	0.696501	0.790154	0.835683	0.567699	5.83267e-14	0	0	2.0299e-08	1	1	1	1	1
ANKAR	-0.150962	-0.23484	-0.373414	-0.196511	0.187776	0.0282977	0.000477865	0.0929515	0	0	0	0	0
ANKDD1A	0.271067	-0.00429791	-0.0960225	-0.191312	0.0134326	0.97216	0.414099	0.102746	0	0	0	0	0
ANKFN1	-0.137465	-0.390827	-0.338398	-0.134095	0.23343	0.000134145	0.00173441	0.267197	0	0	0	0	0
ANKFY1	-0.281375	-0.65848	-0.527774	0.206913	0.0100425	8.40535e-13	2.00764e-07	0.0755819	0	-1	-1	0	0
ANKH	-0.26554	0.0971475	0.0579707	-0.153249	0.0155982	0.389331	0.630679	0.199515	0	0	0	0	0
ANKHD1	0.17684	0.285453	0.179633	0.286134	0.118512	0.00681867	0.11356	0.0110935	0	0	0	0	0
ANKHD1-EIF4EBP3	-0.374797	-0.493602	-0.495871	-0.379135	0.000410424	6.14647e-07	1.39612e-06	0.000499849	0	0	0	0	0
ANKIB1	0.259258	-0.0618321	-0.0956698	0.203971	0.0184433	0.591724	0.415814	0.0801746	0	0	0	0	0
ANKLE1	-0.548084	-0.519546	-0.589539	-0.352711	4.03627e-08	1.16053e-07	2.55344e-09	0.0013347	-1	-1	-1	0	0
ANKLE2	0.34282	0.4086	0.380261	0.325696	0.00137666	5.96687e-05	0.000364951	0.00335128	0	0	0	0	0
ANKMY1	-0.405597	-0.21954	-0.239896	-0.225611	0.00011362	0.0412744	0.0310017	0.0506968	0	0	0	0	0
ANKMY2	0.808085	0.838841	0.877684	0.568802	0	0	0	1.8752e-08	1	1	1	1	1
ANKRA2	0.611444	0.655667	0.64655	0.588301	2.96292e-10	1.13843e-12	1.80543e-11	4.4202e-09	1	1	1	1	1
ANKRD10	0.118647	0.305919	0.415634	0.478761	0.30855	0.00353826	8.17594e-05	5.16871e-06	0	0	0	0	0
ANKRD11	-0.761113	-0.754211	-0.752878	-0.727138	0	0	0	5.46724e-15	-1	-1	-1	-1	-1
ANKRD12	0.214297	0.221363	0.174107	0.00927595	0.0548946	0.0395234	0.125917	0.947618	0	0	0	0	0
ANKRD13A	0.408856	0.341513	0.268514	0.494314	9.84214e-05	0.00100316	0.0148808	2.19917e-06	0	0	0	0	0
ANKRD13B	-0.543209	-0.578082	-0.583847	-0.502397	5.63544e-08	1.55395e-09	3.97096e-09	1.38043e-06	-1	-1	-1	-1	-1
ANKRD13C	0.693352	0.721987	0.675198	0.531645	8.34575e-14	0	9.89246e-13	2.31718e-07	1	1	1	1	1
ANKRD13D	-0.204251	-0.0724321	-0.160652	-0.436514	0.0684405	0.526788	0.159772	4.29655e-05	0	0	0	0	0
ANKRD16	0.11964	0.259417	0.26233	-0.0919279	0.304223	0.01465	0.0175499	0.461742	0	0	0	0	0
ANKRD17	0.349906	0.438034	0.520555	0.266799	0.00106334	1.40849e-05	3.17277e-07	0.0187363	0	0	1	0	0
ANKRD18A	-0.151391	-0.221084	-0.294809	0.0930987	0.186469	0.0397748	0.0070472	0.455449	0	0	0	0	0
ANKRD18B	-0.486587	-0.51091	-0.365789	-0.358679	1.94592e-06	2.05328e-07	0.000639929	0.00107683	0	-1	0	0	0
ANKRD19P	-0.415786	-0.316577	-0.0901635	-0.284218	7.20983e-05	0.00246588	0.445047	0.0117119	0	0	0	0	0
ANKRD20A1	-0.301372	-0.380728	-0.366873	-0.436854	0.00549605	0.000207785	0.000614659	4.22555e-05	0	0	0	0	0
ANKRD20A16P	-0.0984989	0.105556	0.159555	0.121103	0.403592	0.347355	0.162785	0.321332	0	0	0	0	0
ANKRD20A17P	-0.0912018	0.0590107	0.103316	0.0237448	0.441774	0.609658	0.377774	0.862031	0	0	0	0	0
ANKRD20A18P	-0.228797	-0.186249	-0.0837651	-0.198712	0.0393948	0.086771	0.479436	0.0890364	0	0	0	0	0
ANKRD20A19P	-0.38512	0.0104564	-0.0453357	-0.45127	0.000270215	0.930952	0.708376	2.1169e-05	0	0	0	0	0
ANKRD20A2	-0.357407	-0.497631	-0.491511	-0.432044	0.000805677	4.78913e-07	1.79093e-06	5.29927e-05	0	0	0	0	0
ANKRD20A20P	0.104109	0.211432	0.312939	-0.052597	0.37509	0.0499418	0.00403767	0.686227	0	0	0	0	0
ANKRD20A3	0.37324	0.348384	0.296442	0.0249911	0.000437104	0.000772594	0.00671985	0.854578	0	0	0	0	0
ANKRD20A4	-0.318309	-0.292149	-0.254101	-0.443682	0.00319579	0.00553173	0.0217452	3.06828e-05	0	0	0	0	0
ANKRD20A5P	-0.395782	-0.354988	-0.394374	-0.391359	0.00017328	0.000597481	0.000205276	0.000308274	0	0	0	0	0
ANKRD20A6P	-0.362299	-0.2429	-0.265628	-0.129163	0.000669207	0.0229737	0.0160777	0.286959	0	0	0	0	0
ANKRD20A7P	-0.0567465	-0.0965039	-0.0379465	-0.245222	0.640332	0.392519	0.756204	0.0322439	0	0	0	0	0
ANKRD20A8P	-0.34469	-0.179806	-0.262274	-0.210048	0.00128595	0.0990163	0.0175748	0.0708473	0	0	0	0	0
ANKRD20A9P	0.0327713	0.195448	0.244919	-0.0149138	0.791948	0.0712652	0.027391	0.914224	0	0	0	0	0
ANKRD23	-0.535104	-0.643709	-0.671125	-0.208191	9.73552e-08	3.96918e-12	1.52209e-12	0.0736437	-1	-1	-1	0	0
ANKRD24	-0.234394	-0.183958	-0.160666	-0.343414	0.0344662	0.0909524	0.159743	0.00185143	0	0	0	0	0
ANKRD26	-0.195907	-0.14234	-0.192046	-0.281608	0.0813755	0.197867	0.0891304	0.0125904	0	0	0	0	0
ANKRD26P3	-0.10418	-0.0464014	-0.0531983	-0.197312	0.374748	0.691658	0.659689	0.0915303	0	0	0	0	0
ANKRD27	0.305945	0.0969745	0.197486	-0.0254155	0.00476492	0.390179	0.0799144	0.851935	0	0	0	0	0
ANKRD28	0.63594	0.677913	0.645781	0.500573	3.29709e-11	9.4674e-14	1.94388e-11	1.53382e-06	1	1	1	1	1
ANKRD29	0.451738	0.688257	0.723491	-0.0197962	1.2776e-05	2.80832e-14	3.339e-15	0.885033	0	1	1	0	0
ANKRD30B	0.081858	0.0337708	0.139216	-0.140258	0.493479	0.774329	0.227159	0.243986	0	0	0	0	0
ANKRD30BL	0.216741	0.276805	0.372469	-0.0958087	0.0519601	0.00886351	0.000495814	0.441405	0	0	0	0	0
ANKRD30BP1	-0.0172708	0.203514	0.332918	0.00846202	0.891583	0.0597261	0.00209261	0.95243	0	0	0	0	0
ANKRD30BP2	-0.176966	-0.118531	-0.245548	-0.269261	0.11826	0.28836	0.0269642	0.0175622	0	0	0	0	0
ANKRD32	0.499989	0.57108	0.676427	0.139382	8.91004e-07	2.72952e-09	8.64937e-13	0.247175	0	1	1	0	0
ANKRD33B	0.103063	0.103118	0.166729	-0.196756	0.380531	0.359363	0.143696	0.0925516	0	0	0	0	0
ANKRD34A	-0.0481224	0.0562274	0.224694	-0.17033	0.694617	0.62726	0.0443736	0.150096	0	0	0	0	0
ANKRD34C	0.410601	0.629557	0.667726	0.173374	9.11013e-05	1.6202e-11	2.17316e-12	0.142275	0	1	1	0	0
ANKRD34C-AS1	0.293477	0.217163	0.412334	-0.0114586	0.00700931	0.0436196	9.47165e-05	0.935175	0	0	0	0	0
ANKRD35	0.137227	-0.336894	-0.198902	-0.319866	0.234319	0.00119026	0.0776337	0.00404525	0	0	0	0	0
ANKRD36	-0.118673	-0.134773	-0.163355	0.00271154	0.308441	0.224216	0.152463	0.985571	0	0	0	0	0
ANKRD36B	-0.341166	-0.420069	-0.49773	-0.390214	0.0014588	3.45601e-05	1.25445e-06	0.000322904	0	0	0	0	0
ANKRD36BP1	-0.226787	-0.571484	-0.576401	-0.0976488	0.0412891	2.64489e-09	6.99119e-09	0.432363	0	-1	-1	0	0
ANKRD36BP2	0.0177342	0.226792	0.20658	-0.252475	0.888477	0.0346347	0.0661711	0.0269873	0	0	0	0	0
ANKRD36C	-0.544695	-0.556213	-0.597002	-0.324793	5.09078e-08	8.58853e-09	1.41016e-09	0.00345088	-1	-1	-1	0	0
ANKRD36P1	0.212362	0.359324	0.324848	0.293389	0.0573487	0.00050323	0.00274476	0.00901238	0	0	0	0	0
ANKRD37	-0.199661	-0.183424	-0.0658495	-0.0654011	0.0753676	0.0919525	0.582798	0.609958	0	0	0	0	0
ANKRD39	0.536223	0.600997	0.569537	0.345962	9.03458e-08	2.24617e-10	1.15965e-08	0.00169384	1	1	1	0	0
ANKRD40	-0.505026	-0.589955	-0.625297	-0.279447	6.59366e-07	5.81961e-10	1.28739e-10	0.0133636	-1	-1	-1	0	0
ANKRD42	0.604217	0.722922	0.773602	0.046725	5.48656e-10	0	0	0.720743	1	1	1	0	0
ANKRD44	0.111274	-0.0638366	-0.201502	0.262307	0.341029	0.579046	0.0735526	0.0210397	0	0	0	0	0
ANKRD45	-0.0222663	-0.686346	-0.668267	-0.452603	0.859425	3.53407e-14	2.05579e-12	1.98029e-05	0	-1	-1	0	0
ANKRD46	0.719226	0.83584	0.882739	0.624806	3.65993e-15	0	0	2.19712e-10	1	1	1	1	1
ANKRD49	0.206104	0.163297	0.194174	0.398175	0.0657404	0.136753	0.0854586	0.000233482	0	0	0	0	0
ANKRD50	0.650811	0.721547	0.713809	0.346306	7.85204e-12	0	1.13194e-14	0.0016736	1	1	1	0	0
ANKRD52	-0.55883	-0.569796	-0.441354	-0.518719	1.88217e-08	3.01862e-09	2.47745e-05	5.20078e-07	-1	-1	0	-1	0
ANKRD54	0.160061	0.2628	0.267129	-0.186653	0.16065	0.0133148	0.0154496	0.111998	0	0	0	0	0
ANKRD57P1	-0.281894	-0.215463	-0.29103	-0.0956138	0.00989326	0.0454029	0.00788383	0.442494	0	0	0	0	0
ANKRD6	0.491978	-0.0101751	0.284944	-0.049071	1.42405e-06	0.932722	0.00940907	0.706886	0	0	0	0	0
ANKRD60	-0.575221	-0.501941	-0.632391	-0.49848	5.57664e-09	3.65347e-07	6.79831e-11	1.73207e-06	-1	-1	-1	0	0
ANKRD62	-0.0412184	-0.167946	-0.173765	-0.410278	0.73804	0.125172	0.126662	0.000140363	0	0	0	0	0
ANKRD65	0.153376	0.243129	0.124902	0.249667	0.180239	0.0228299	0.28112	0.0289432	0	0	0	0	0
ANKRD9	-0.558907	-0.624932	-0.609443	-0.601938	1.8719e-08	2.5263e-11	5.0508e-10	1.5054e-09	-1	-1	-1	-1	-1
ANKS1A	-0.632585	-0.750976	-0.806697	-0.709721	4.51334e-11	0	0	3.54252e-14	-1	-1	-1	-1	-1
ANKS1B	0.740655	0.815534	0.830059	0.77216	0	0	0	0	1	1	1	1	1
ANKS3	-0.438862	-0.22258	-0.281955	-0.366872	2.43385e-05	0.0383957	0.0102412	0.000797098	0	0	0	0	0
ANKS4B	-0.523608	-0.510665	-0.51371	-0.556719	2.07167e-07	2.08635e-07	4.8526e-07	4.41983e-08	-1	-1	-1	-1	-1
ANKS6	-0.383404	-0.311061	-0.294505	0.0559868	0.00028959	0.00297682	0.00711055	0.665934	0	0	0	0	0
ANKZF1	-0.409509	-0.436012	-0.465102	-0.0394826	9.56598e-05	1.56072e-05	7.54908e-06	0.76468	0	0	0	0	0
ANLN	-0.0124167	0.0193745	-8.95025e-06	0.301494	0.923165	0.870827	0.999933	0.00711859	0	0	0	0	0
ANO10	0.684805	0.520582	0.637035	0.604548	2.20609e-13	1.08406e-07	4.42956e-11	1.21921e-09	1	1	1	1	1
ANO2	-0.707807	-0.691231	-0.72773	-0.601799	1.54787e-14	1.94677e-14	2.04367e-15	1.52108e-09	-1	-1	-1	-1	-1
ANO3	0.765147	0.746262	0.836891	0.230098	0	0	0	0.0458401	1	1	1	0	0
ANO4	0.321443	0.501953	0.568522	0.213372	0.00288143	3.6511e-07	1.24821e-08	0.0660656	0	1	1	0	0
ANO5	0.719022	0.789695	0.819963	0.115243	3.65993e-15	0	0	0.347219	1	1	1	0	0
ANO6	-0.0735134	-0.576691	-0.617445	-0.0485357	0.540898	1.73947e-09	2.56259e-10	0.710104	0	-1	-1	0	0
ANO8	-0.384936	-0.366241	-0.620689	-0.577697	0.000272156	0.000381059	1.93493e-10	9.80578e-09	0	0	-1	-1	0
ANP32A	0.537293	0.585635	0.545653	0.305233	8.42866e-08	8.35469e-10	6.19686e-08	0.00636431	1	1	1	0	0
ANP32A-IT1	-0.782209	-0.792012	-0.776604	-0.259183	0	0	0	0.0227875	-1	-1	-1	0	0
ANP32B	-0.524683	-0.474757	-0.515848	-0.364204	1.93047e-07	1.89427e-06	4.25505e-07	0.000879433	-1	0	-1	0	0
ANP32C	-0.266174	-0.418773	-0.153706	-0.0178914	0.0153452	3.67811e-05	0.179833	0.896493	0	0	0	0	0
ANP32E	0.155977	-0.00282893	0.00289286	-0.184789	0.172509	0.982081	0.982015	0.115855	0	0	0	0	0
ANTXR1	-0.557679	-0.727933	-0.775635	-0.450664	2.04828e-08	0	0	2.18197e-05	-1	-1	-1	0	0
ANTXR2	-0.275342	-0.170269	-0.446347	-0.105485	0.0119267	0.119759	1.94172e-05	0.392859	0	0	0	0	0
ANXA1	-0.0571879	-0.108064	-0.190187	0.162038	0.637736	0.335258	0.0925244	0.172808	0	0	0	0	0
ANXA11	0.219757	0.183959	0.275252	-0.115209	0.0485643	0.0909524	0.0123502	0.347314	0	0	0	0	0
ANXA2	-0.0708496	-0.151957	-0.268371	0.0917741	0.555887	0.167817	0.0149355	0.462593	0	0	0	0	0
ANXA2P1	-0.152022	-0.155201	-0.0432971	0.288684	0.184472	0.15823	0.721253	0.0103259	0	0	0	0	0
ANXA3	-0.28069	-0.372387	-0.401866	-0.402067	0.0102447	0.000296059	0.000149596	0.000198555	0	0	0	0	0
ANXA4	0.0613726	-0.151641	-0.0514302	0.189675	0.612682	0.168741	0.670219	0.105912	0	0	0	0	0
ANXA5	0.117011	-0.162534	-0.255537	0.384151	0.31564	0.138621	0.0209561	0.000411087	0	0	0	0	0
ANXA6	0.799057	0.878433	0.921148	0.313876	0	0	0	0.00488007	1	1	1	0	0
ANXA7	0.835838	0.798068	0.805102	0.803823	0	0	0	0	1	1	1	1	1
ANXA9	-0.326024	-0.477901	-0.510467	0.0977969	0.00246896	1.57832e-06	5.9087e-07	0.431517	0	0	-1	0	0
AOAH	0.0298589	-0.279338	-0.353291	0.144406	0.810614	0.00821156	0.00101922	0.229141	0	0	0	0	0
AOC2	-0.451783	-0.35703	-0.375571	-0.235736	1.27497e-05	0.00055111	0.000439517	0.0403025	0	0	0	0	0
AP1AR	0.729594	0.79606	0.825888	0.59421	0	0	0	2.7861e-09	1	1	1	1	1
AP1B1	0.322535	0.324827	0.295318	-0.0182644	0.00277761	0.00184672	0.00694489	0.894371	0	0	0	0	0
AP1G1	0.798004	0.786833	0.849751	0.848302	0	0	0	0	1	1	1	1	1
AP1G2	-0.302469	-0.402875	-0.325158	-0.313411	0.00531065	7.79124e-05	0.00271764	0.00494885	0	0	0	0	0
AP1M1	0.411017	0.479444	0.569966	0.196529	8.94532e-05	1.44155e-06	1.12331e-08	0.092923	0	0	1	0	0
AP1S1	0.690935	0.805379	0.840154	0.300043	1.09679e-13	0	0	0.00741839	1	1	1	0	0
AP1S2	0.56264	0.79934	0.83481	0.702989	1.42784e-08	0	0	7.93993e-14	1	1	1	1	1
AP1S3	-0.616146	-0.592891	-0.591155	-0.556866	1.96726e-10	4.52662e-10	2.24812e-09	4.37557e-08	-1	-1	-1	-1	-1
AP2A1	0.181193	0.224328	0.320361	-0.0952743	0.109031	0.0367902	0.00318304	0.444252	0	0	0	0	0
AP2A2	0.377902	0.572799	0.613341	0.0173112	0.000362216	2.38188e-09	3.64001e-10	0.899444	0	1	1	0	0
AP2B1	0.760549	0.684255	0.782928	0.365205	0	4.4894e-14	0	0.000847178	1	1	1	0	0
AP2M1	0.84989	0.902777	0.919565	0.571437	0	0	0	1.55217e-08	1	1	1	1	1
AP2S1	0.817776	0.852128	0.868689	0.534276	0	0	0	1.96237e-07	1	1	1	1	1
AP3B1	0.0516559	-0.211915	-0.279562	0.1292	0.672742	0.0493737	0.0109544	0.286808	0	0	0	0	0
AP3B2	0.706024	0.650441	0.764338	-0.0197865	1.85839e-14	1.98284e-12	0	0.88506	1	1	1	0	0
AP3D1	0.00512442	-0.0645213	-0.0770772	-0.380168	0.969628	0.574718	0.51766	0.00047989	0	0	0	0	0
AP3M1	0.12551	-0.231486	-0.184278	0.289993	0.279167	0.0307984	0.103837	0.00994816	0	0	0	0	0
AP3M2	0.820334	0.896851	0.912437	0.419056	0	0	0	9.55012e-05	1	1	1	0	0
AP3S1	0.700151	0.72384	0.804494	0.43398	3.72377e-14	0	0	4.845e-05	1	1	1	0	0
AP3S2	0.466968	0.520528	0.335047	0.433147	5.75712e-06	1.088e-07	0.00194501	5.03734e-05	0	1	0	0	0
AP4B1	0.461043	0.614991	0.688276	0.442675	7.87022e-06	6.41042e-11	2.32924e-13	3.21382e-05	0	1	1	0	0
AP4B1-AS1	-0.532689	-0.491406	-0.557776	-0.443896	1.14232e-07	7.04022e-07	2.69513e-08	3.03686e-05	-1	0	-1	0	0
AP4E1	-0.441912	-0.319537	-0.264012	0.0833243	2.09402e-05	0.00222726	0.0167876	0.508213	0	0	0	0	0
AP4M1	0.0649815	0.387198	0.0867237	0.124978	0.590665	0.000157117	0.463336	0.304432	0	0	0	0	0
AP4S1	0.142099	0.381709	0.371698	-0.0997397	0.217212	0.000199328	0.000510757	0.421874	0	0	0	0	0
AP5B1	-0.768825	-0.729269	-0.801454	-0.731498	0	0	0	0	-1	-1	-1	-1	-1
AP5M1	0.693727	0.756212	0.773348	0.691149	7.99756e-14	0	0	3.12337e-13	1	1	1	1	1
AP5S1	0.0473983	0.131612	-0.138248	-0.139116	0.69889	0.235977	0.230592	0.248108	0	0	0	0	0
AP5Z1	-0.371751	-0.439598	-0.46643	-0.345133	0.000463363	1.29925e-05	7.03884e-06	0.00174384	0	0	0	0	0
APAF1	0.283275	0.477876	0.491855	0.322284	0.00950523	1.58054e-06	1.75571e-06	0.00373977	0	0	0	0	0
APBA1	-0.0560166	0.155363	0.244648	-0.168741	0.64494	0.157792	0.0275798	0.154305	0	0	0	0	0
APBA2	0.501062	0.667135	0.694881	0.331602	8.3516e-07	3.25614e-13	1.09921e-13	0.00276042	1	1	1	0	0
APBA3	-0.422455	-0.387811	-0.370884	-0.15864	5.32497e-05	0.000153033	0.000526978	0.182818	0	0	0	0	0
APBB1	0.772447	0.863057	0.883186	0.767937	0	0	0	0	1	1	1	1	1
APBB1IP	-0.0478091	-0.293553	-0.314862	0.216063	0.69647	0.00529008	0.00380081	0.0624665	0	0	0	0	0
APBB2	0.12306	0.124453	0.0314685	0.325006	0.289512	0.263788	0.798407	0.00342773	0	0	0	0	0
APBB3	0.675255	0.707915	0.752817	0.353062	6.29058e-13	2.83245e-15	0	0.00131838	1	1	1	0	0
APC	0.0121612	0.412627	0.339131	0.0289259	0.924895	4.93537e-05	0.00169025	0.830198	0	0	0	0	0
APC2	-0.523759	-0.574618	-0.639566	-0.65125	2.0518e-07	2.05725e-09	3.49534e-11	1.94177e-11	-1	-1	-1	-1	-1
APCDD1	-0.522596	-0.715629	-0.754784	-0.515444	2.20866e-07	7.56273e-16	0	6.34664e-07	-1	-1	-1	-1	-1
APEH	0.719752	0.642951	0.715539	0.287014	2.48975e-15	4.28348e-12	8.90096e-15	0.0108175	1	1	1	0	0
APEX1	0.725077	0.67139	0.681927	0.671392	2.48975e-15	2.01422e-13	4.74083e-13	2.5863e-12	1	1	1	1	1
APEX2	0.419405	0.283147	0.331932	0.517193	6.12084e-05	0.00732027	0.0021643	5.70759e-07	0	0	0	1	0
APH1A	0.258349	0.156169	-0.0451217	0.224218	0.0188876	0.155513	0.709735	0.0522805	0	0	0	0	0
APH1B	0.449059	0.398767	0.351065	0.509598	1.46491e-05	9.38391e-05	0.00110562	9.00917e-07	0	0	0	1	0
API5	0.794959	0.834838	0.875363	0.853535	0	0	0	0	1	1	1	1	1
APIP	0.447346	0.557663	0.602586	0.511664	1.59768e-05	7.7119e-09	8.92903e-10	7.98529e-07	0	1	1	1	0
APITD1	0.197796	0.493458	0.565428	-0.0515098	0.0783068	6.20052e-07	1.56174e-08	0.692247	0	0	1	0	0
APLF	0.0587616	-0.219684	-0.307161	-0.235679	0.628106	0.0411321	0.00484425	0.0403543	0	0	0	0	0
APLN	0.0982449	-0.0886104	-0.314318	0.143157	0.404886	0.434147	0.00386613	0.233535	0	0	0	0	0
APLNR	0.0487166	-0.0539646	-0.0430963	0.203069	0.690997	0.641434	0.722498	0.0816249	0	0	0	0	0
APLP1	0.494354	0.567255	0.599879	0.465816	1.24011e-06	3.69423e-09	1.11617e-09	1.02186e-05	0	1	1	0	0
APLP2	0.81766	0.8306	0.837224	0.333047	0	0	0	0.00262959	1	1	1	0	0
APMAP	0.81012	0.864927	0.893339	0.762161	0	0	0	0	1	1	1	1	1
APOA1-AS	-0.441249	-0.407792	-0.468643	-0.0200891	2.16571e-05	6.19517e-05	6.26709e-06	0.883286	0	0	0	0	0
APOA1BP	0.521124	0.608618	0.559833	0.441366	2.42558e-07	1.14346e-10	2.33288e-08	3.42038e-05	1	1	1	0	0
APOBEC3A	-0.428472	-0.531564	-0.564615	-0.351096	4.01102e-05	5.11866e-08	1.65662e-08	0.00141442	0	-1	-1	0	0
APOBEC3D	-0.584039	-0.59628	-0.704857	-0.662461	2.81692e-09	3.38609e-10	3.40399e-14	6.53297e-12	-1	-1	-1	-1	-1
APOBEC4	0.117385	0.0431286	0.103932	-0.0466618	0.314162	0.712857	0.37486	0.721138	0	0	0	0	0
APOC1	0.273131	0.150114	0.056733	0.159248	0.0126812	0.173363	0.637995	0.181096	0	0	0	0	0
APOC2	0.274623	0.15024	0.00190326	0.32792	0.0121648	0.172992	0.988284	0.00311868	0	0	0	0	0
APOD	-0.412961	-0.402144	-0.428478	0.117085	8.19135e-05	8.05379e-05	4.56658e-05	0.338912	0	0	0	0	0
APOE	0.00511503	-0.239895	-0.302207	-0.157879	0.969649	0.0248344	0.00564789	0.185115	0	0	0	0	0
APOL1	-0.553887	-0.526909	-0.563253	-0.434638	2.6946e-08	7.05147e-08	1.82631e-08	4.69627e-05	-1	-1	-1	0	0
APOL2	0.482001	0.757926	0.76316	0.24574	2.52872e-06	0	0	0.0318452	0	1	1	0	0
APOL3	-0.369518	-0.568856	-0.58376	-0.44287	0.000505508	3.24815e-09	3.99689e-09	3.18543e-05	0	-1	-1	0	0
APOL4	-0.188959	-0.127641	-0.185498	0.19163	0.0938022	0.251198	0.101441	0.102125	0	0	0	0	0
APOL6	-0.133228	-0.512734	-0.529977	-0.0979398	0.249138	1.82077e-07	1.74278e-07	0.430813	0	-1	-1	0	0
APOLD1	-0.20156	-0.339832	-0.483557	-0.405623	0.0724591	0.00106925	2.80191e-06	0.000171281	0	0	0	0	0
APOO	0.84132	0.896524	0.889518	0.52805	0	0	0	2.90697e-07	1	1	1	1	1
APOOL	0.548622	0.25555	0.408697	0.13856	3.88743e-08	0.0163147	0.000111249	0.250101	1	0	0	0	0
APOPT1	0.369962	0.225434	0.260159	-0.0652805	0.000496606	0.0358	0.0185838	0.610642	0	0	0	0	0
APP	0.867817	0.921675	0.931032	0.862503	0	0	0	0	1	1	1	1	1
APPBP2	0.692179	0.740645	0.786331	0.749229	9.56094e-14	0	0	0	1	1	1	1	1
APPL1	0.632076	0.623536	0.665106	0.515756	4.72476e-11	2.87993e-11	2.85086e-12	6.23094e-07	1	1	1	1	1
APPL2	-0.346849	-0.75554	-0.748122	-0.138909	0.00118848	0	0	0.248841	0	-1	-1	0	0
APRT	0.327759	0.425462	0.386316	0.252311	0.00232965	2.65255e-05	0.00028582	0.0270965	0	0	0	0	0
APTR	0.245987	0.15531	0.257736	0.126582	0.0259329	0.157934	0.0197941	0.297668	0	0	0	0	0
APTX	0.677453	0.69514	0.716741	0.608082	4.94768e-13	1.19568e-14	7.67511e-15	9.146e-10	1	1	1	1	1
AQP1	-0.0780926	-0.123563	-0.149179	0.199452	0.514669	0.26737	0.193723	0.0877031	0	0	0	0	0
AQP11	0.0798909	0.30952	0.368023	0.230874	0.504544	0.0031369	0.000588406	0.0450873	0	0	0	0	0
AQP3	0.0245638	0.208358	0.316589	-0.0555146	0.844736	0.0535551	0.00359777	0.668539	0	0	0	0	0
AQP4	0.337033	-0.184658	-0.10795	0.405547	0.00169056	0.0896418	0.35603	0.00017183	0	0	0	0	0
AQP4-AS1	-0.127735	-0.330242	-0.283789	-0.0645776	0.270238	0.00151853	0.00972197	0.61409	0	0	0	0	0
AQP6	-0.55802	-0.494462	-0.684733	-0.32204	1.99821e-08	5.83347e-07	3.47165e-13	0.00376851	-1	0	-1	0	0
AQP9	-0.153767	0.00790338	0.20592	-0.0586256	0.179049	0.948345	0.067078	0.650365	0	0	0	0	0
AQR	0.708596	0.711126	0.729307	0.74707	1.34204e-14	1.44989e-15	1.37341e-15	0	1	1	1	1	1
ARAF	-0.264022	-0.340545	-0.370777	0.00915233	0.0162373	0.00104105	0.000529028	0.948169	0	0	0	0	0
ARAP1	-0.663589	-0.703703	-0.757838	-0.39838	2.16259e-12	4.16713e-15	0	0.000231615	-1	-1	-1	0	0
ARAP2	-0.047239	-0.174748	-0.104205	0.205699	0.699805	0.10955	0.373623	0.077485	0	0	0	0	0
ARAP3	-0.572521	-0.335466	-0.442034	-0.552707	6.84866e-09	0.0012549	2.39754e-05	5.80788e-08	-1	0	0	-1	0
ARC	-0.22115	0.0072982	0.0121066	-0.133975	0.0470633	0.952303	0.922122	0.267645	0	0	0	0	0
ARCN1	0.826589	0.866379	0.862501	0.803291	0	0	0	0	1	1	1	1	1
AREL1	0.701088	0.781515	0.805174	0.633699	3.3506e-14	0	0	9.95328e-11	1	1	1	1	1
ARF1	0.635262	0.630762	0.639279	0.20224	3.51125e-11	1.44074e-11	3.59194e-11	0.0829724	1	1	1	0	0
ARF1P2	-0.404493	-0.344024	-0.322398	0.0807413	0.000119157	0.000912385	0.00297631	0.522862	0	0	0	0	0
ARF3	0.737171	0.813248	0.833996	0.11711	0	0	0	0.338829	1	1	1	0	0
ARF4	0.753259	0.809095	0.815071	0.805338	0	0	0	0	1	1	1	1	1
ARF4P2	-0.396598	-0.381684	-0.42206	-0.224473	0.000167198	0.000199538	6.12229e-05	0.0519823	0	0	0	0	0
ARF5	0.759933	0.802454	0.852723	0.424972	0	0	0	7.30507e-05	1	1	1	0	0
ARF6	0.0517271	0.266924	0.0546576	0.0280001	0.672319	0.0118184	0.65063	0.835962	0	0	0	0	0
ARFGAP1	-0.127188	0.0613034	-0.123415	-0.122443	0.272384	0.595097	0.287386	0.315456	0	0	0	0	0
ARFGAP2	0.637882	0.671798	0.682854	0.534233	2.74816e-11	1.92181e-13	4.28801e-13	1.96772e-07	1	1	1	1	1
ARFGAP3	0.57652	0.428691	0.314989	0.533726	5.04793e-09	2.26216e-05	0.00378521	2.03067e-07	1	0	0	1	0
ARFGEF1	0.688252	0.649758	0.701101	0.484588	1.49854e-13	2.12923e-12	5.30823e-14	3.77182e-06	1	1	1	0	0
ARFGEF2	0.755223	0.866404	0.849305	0.491757	0	0	0	2.53608e-06	1	1	1	0	0
ARFGEF3	0.567618	0.777229	0.838785	0.626192	9.88994e-09	0	0	1.94588e-10	1	1	1	1	1
ARFIP1	0.268798	0.354484	0.285926	0.525744	0.0142838	0.00060935	0.00914655	3.35793e-07	0	0	0	1	0
ARFIP2	0.804638	0.792519	0.824256	0.61295	0	0	0	6.10911e-10	1	1	1	1	1
ARFRP1	-0.160318	-0.0857522	-0.0853416	-0.302375	0.159943	0.44994	0.470787	0.0069325	0	0	0	0	0
ARG2	0.586837	0.618385	0.606686	0.441859	2.26261e-09	4.68729e-11	6.36289e-10	3.33827e-05	1	1	1	0	0
ARGFX	-0.606531	-0.608841	-0.605886	-0.554368	4.50131e-10	1.12183e-10	6.80239e-10	5.18272e-08	-1	-1	-1	-1	-1
ARGFXP2	-0.650738	-0.54494	-0.730499	-0.484125	7.90531e-12	1.9707e-08	1.37341e-15	3.86835e-06	-1	-1	-1	0	0
ARGLU1	0.57462	0.485899	0.511815	0.55815	5.83427e-09	9.82284e-07	5.44386e-07	4.00208e-08	1	0	1	1	0
ARHGAP1	-0.0520149	-0.285653	-0.340699	0.0656321	0.670551	0.00677585	0.00160042	0.608809	0	0	0	0	0
ARHGAP10	-0.0289125	0.217514	-0.242466	-0.395093	0.816902	0.0432728	0.0291093	0.000264835	0	0	0	0	0
ARHGAP11A	-0.195881	-0.124955	-0.155411	-0.228654	0.0814112	0.26185	0.174754	0.0473429	0	0	0	0	0
ARHGAP12	0.605232	0.501932	0.467616	0.474779	5.03048e-10	3.65515e-07	6.61229e-06	6.3831e-06	1	1	0	0	0
ARHGAP15	0.13312	-0.0960529	-0.30565	0.0517883	0.24956	0.394778	0.00508067	0.690762	0	0	0	0	0
ARHGAP17	-0.698076	-0.697244	-0.718732	-0.129222	4.87526e-14	9.39328e-15	6.44224e-15	0.286719	-1	-1	-1	0	0
ARHGAP18	0.466448	0.134609	0.222775	0.181591	5.91799e-06	0.224843	0.0463571	0.12279	0	0	0	0	0
ARHGAP19	0.0742843	-0.311424	-0.255508	0.202715	0.536654	0.00294029	0.0209698	0.0821798	0	0	0	0	0
ARHGAP20	0.735767	0.827103	0.864658	0.222611	0	0	0	0.0541483	1	1	1	0	0
ARHGAP21	0.354867	0.0413858	-0.0355451	0.239066	0.000885992	0.724172	0.771819	0.0373137	0	0	0	0	0
ARHGAP22	-0.240707	-0.354044	-0.350808	0.0324258	0.0295771	0.000619737	0.00111572	0.8084	0	0	0	0	0
ARHGAP23	-0.569655	-0.639351	-0.693649	-0.168511	8.50085e-09	6.15272e-12	1.27041e-13	0.154916	-1	-1	-1	0	0
ARHGAP23P1	-0.669627	-0.674397	-0.72062	-0.177561	1.14873e-12	1.42606e-13	5.21357e-15	0.132195	-1	-1	-1	0	0
ARHGAP24	0.569501	0.438173	0.508851	0.0480076	8.60219e-09	1.3984e-05	6.51629e-07	0.71327	1	0	1	0	0
ARHGAP25	0.145068	-0.0497917	0.0625793	0.239021	0.207018	0.669284	0.6024	0.0373549	0	0	0	0	0
ARHGAP26	0.280426	0.378116	0.478589	-0.162107	0.0103235	0.000232336	3.67388e-06	0.172659	0	0	0	0	0
ARHGAP26-IT1	-0.11816	-0.379221	-0.19584	-0.218614	0.31068	0.000221661	0.0826244	0.059124	0	0	0	0	0
ARHGAP27	-0.464283	-0.469897	-0.633288	-0.415193	6.62824e-06	2.49911e-06	6.26648e-11	0.000113302	0	0	-1	0	0
ARHGAP29	-0.535239	-0.539791	-0.55787	-0.501488	9.64794e-08	2.86295e-08	2.6773e-08	1.45505e-06	-1	-1	-1	-1	-1
ARHGAP30	-0.187193	-0.329481	-0.486649	-0.0304407	0.0971178	0.00156142	2.35985e-06	0.82078	0	0	0	0	0
ARHGAP31	-0.676428	-0.815108	-0.844114	-0.689011	5.52637e-13	0	0	3.94146e-13	-1	-1	-1	-1	-1
ARHGAP32	0.275336	0.458428	0.429342	-0.0782847	0.0119277	4.74864e-06	4.38703e-05	0.536571	0	0	0	0	0
ARHGAP33	-0.680426	-0.682301	-0.763099	-0.744959	3.57999e-13	5.67185e-14	0	0	-1	-1	-1	-1	-1
ARHGAP35	0.169307	-0.124398	-0.0733004	-0.308869	0.136212	0.263998	0.539013	0.00569385	0	0	0	0	0
ARHGAP36	0.220844	0.322269	0.308016	0.102995	0.0473861	0.00202173	0.00471658	0.405491	0	0	0	0	0
ARHGAP39	-0.411189	-0.463302	-0.55112	-0.550245	8.87755e-05	3.62794e-06	4.27009e-08	6.84875e-08	0	0	-1	-1	0
ARHGAP4	-0.166237	-0.22189	-0.433411	-0.210583	0.144006	0.0390376	3.619e-05	0.0700551	0	0	0	0	0
ARHGAP42	-0.473127	-0.769607	-0.756783	-0.541258	4.13029e-06	0	0	1.24225e-07	0	-1	-1	-1	0
ARHGAP42P3	-0.302643	-0.0471929	-0.0583269	-0.0901037	0.00528287	0.686442	0.628579	0.471518	0	0	0	0	0
ARHGAP44	0.6069	0.734589	0.736199	-0.00835345	4.36434e-10	0	7.1499e-16	0.953114	1	1	1	0	0
ARHGAP5	-0.252573	-0.603013	-0.573806	-0.338834	0.0218928	1.88189e-10	8.46504e-09	0.00216754	0	-1	-1	0	0
ARHGAP5-AS1	-0.167405	-0.533395	-0.387179	-0.390563	0.141019	4.50797e-08	0.000276173	0.000318403	0	-1	0	0	0
ARHGAP6	0.0718842	-0.182889	-0.448017	-0.0365954	0.549768	0.0929494	1.79002e-05	0.782849	0	0	0	0	0
ARHGAP9	-0.186964	-0.288517	-0.22027	-0.269909	0.0975521	0.0062025	0.049069	0.0172596	0	0	0	0	0
ARHGDIA	-0.250648	-0.294867	-0.253812	-0.415743	0.0230212	0.00507264	0.0219079	0.000110544	0	0	0	0	0
ARHGDIB	0.416388	0.160605	0.0244566	0.356	7.01878e-05	0.143544	0.843264	0.00118762	0	0	0	0	0
ARHGDIG	0.415403	0.510612	0.505673	-0.0619603	7.33753e-05	2.09327e-07	7.8793e-07	0.630347	0	1	1	0	0
ARHGEF1	-0.630568	-0.668002	-0.711541	-0.501051	5.41503e-11	2.96093e-13	1.48821e-14	1.49293e-06	-1	-1	-1	-1	-1
ARHGEF10	-0.501986	-0.647883	-0.687662	-0.143283	7.91154e-07	2.58994e-12	2.49512e-13	0.233083	-1	-1	-1	0	0
ARHGEF10L	-0.461239	-0.367918	-0.559232	-0.625056	7.78991e-06	0.000356447	2.43286e-08	2.14973e-10	0	0	-1	-1	0
ARHGEF11	-0.232976	0.0715828	0.0820439	-0.295103	0.0356681	0.531947	0.48892	0.00857201	0	0	0	0	0
ARHGEF12	0.490493	0.444433	0.418941	-0.0944799	1.55118e-06	1.00761e-05	7.053e-05	0.448323	0	0	0	0	0
ARHGEF17	-0.264746	-0.191666	-0.194664	-0.369227	0.0159199	0.077371	0.0845798	0.000730821	0	0	0	0	0
ARHGEF18	-0.382547	-0.354246	-0.390677	-0.109464	0.000300157	0.000615073	0.000239071	0.374038	0	0	0	0	0
ARHGEF2	0.238469	0.556421	0.585664	0.477354	0.0312492	8.46346e-09	3.4511e-09	5.56489e-06	0	1	1	0	0
ARHGEF25	0.37215	0.629848	0.607297	-0.0858501	0.000456194	1.5751e-11	6.04923e-10	0.494508	0	1	1	0	0
ARHGEF26	-0.5623	-0.853573	-0.831575	-0.644031	1.46252e-08	0	0	3.86291e-11	-1	-1	-1	-1	-1
ARHGEF26-AS1	-0.150037	-0.367244	-0.364646	-0.271372	0.190688	0.00036632	0.000668274	0.0165943	0	0	0	0	0
ARHGEF28	0.440119	0.338368	0.566463	-0.0403996	2.28963e-05	0.00112766	1.44898e-08	0.758907	0	0	1	0	0
ARHGEF3	0.739412	0.822519	0.843772	0.409547	0	0	0	0.000144677	1	1	1	0	0
ARHGEF33	-0.162436	-0.301861	-0.258592	-0.295295	0.15404	0.00404675	0.0193624	0.00852764	0	0	0	0	0
ARHGEF37	-0.0693405	-0.278767	-0.23366	0.154156	0.564919	0.00835428	0.0359711	0.196633	0	0	0	0	0
ARHGEF39	-0.342779	-0.46319	-0.308387	-0.244633	0.0013787	3.65007e-06	0.00466034	0.0326891	0	0	0	0	0
ARHGEF4	-0.252682	-0.281883	-0.320542	-0.450264	0.0218335	0.00760025	0.00316463	2.22439e-05	0	0	0	0	0
ARHGEF40	-0.495888	-0.696815	-0.761653	-0.376592	1.13343e-06	9.39328e-15	0	0.00055113	0	-1	-1	0	0
ARHGEF6	0.237556	-0.513342	-0.562561	-0.0317513	0.031956	1.74859e-07	1.91778e-08	0.812355	0	-1	-1	0	0
ARHGEF7	0.466374	0.547343	0.646542	0.362566	5.93948e-06	1.65628e-08	1.8065e-11	0.000934499	0	1	1	0	0
ARHGEF9	0.744075	0.86893	0.873267	0.179404	0	0	0	0.127877	1	1	1	0	0
ARID1A	-0.67342	-0.685107	-0.775689	-0.437779	7.6648e-13	4.07315e-14	0	4.04613e-05	-1	-1	-1	0	0
ARID1B	-0.0213565	-0.241787	-0.166178	-0.279487	0.86552	0.0236529	0.145086	0.0133516	0	0	0	0	0
ARID2	-0.324771	-0.434388	-0.470547	0.151703	0.00257605	1.69514e-05	5.66692e-06	0.204733	0	0	0	0	0
ARID4A	0.613921	0.50093	0.431959	0.215327	2.38907e-10	3.8898e-07	3.87585e-05	0.0634316	1	1	0	0	0
ARID4B	0.507956	0.51883	0.452929	0.414405	5.5143e-07	1.21583e-07	1.40275e-05	0.000117152	1	1	0	0	0
ARID5A	-0.134762	-0.306047	-0.359104	-0.23865	0.243487	0.00352365	0.000823445	0.0376728	0	0	0	0	0
ARID5B	0.281757	0.409706	0.437369	0.440358	0.00993189	5.66512e-05	3.00068e-05	3.58247e-05	0	0	0	0	0
ARIH1	0.75022	0.801299	0.835014	0.657217	0	0	0	1.09852e-11	1	1	1	1	1
ARIH2	0.648174	0.731793	0.723477	0.586475	1.01419e-11	0	3.339e-15	5.07058e-09	1	1	1	1	1
ARIH2OS	-0.273143	-0.229728	-0.28211	-0.0575172	0.0126779	0.0321703	0.0101966	0.656877	0	0	0	0	0
ARL1	0.778923	0.8257	0.858467	0.71656	0	0	0	1.52316e-14	1	1	1	1	1
ARL10	-0.385515	-0.464857	-0.479595	-0.540756	0.000266036	3.32742e-06	3.47818e-06	1.28205e-07	0	0	0	-1	0
ARL13B	0.177589	0.080132	0.0243332	0.372596	0.116864	0.482125	0.843969	0.000642872	0	0	0	0	0
ARL14EP	0.648486	0.629735	0.737473	0.450264	9.84591e-12	1.59234e-11	0	2.22439e-05	1	1	1	0	0
ARL15	0.506475	0.490198	0.449368	0.156081	6.03255e-07	7.57671e-07	1.67282e-05	0.190614	1	0	0	0	0
ARL16	0.457487	0.397329	0.4585	0.199914	9.47836e-06	0.000100136	1.06049e-05	0.086928	0	0	0	0	0
ARL17A	-0.274024	-0.312728	-0.344205	-0.186495	0.0123747	0.00281297	0.00141388	0.112332	0	0	0	0	0
ARL17B	0.0939384	-0.0863279	-0.0057277	-0.0601338	0.427321	0.446649	0.963491	0.641331	0	0	0	0	0
ARL2	0.713152	0.700207	0.746244	0.586347	7.02289e-15	6.17437e-15	0	5.08742e-09	1	1	1	1	1
ARL2-SNX15	0.192039	0.127051	0.183509	0.211033	0.0880945	0.253537	0.105388	0.0693851	0	0	0	0	0
ARL2BP	0.511423	0.677734	0.747436	0.596354	4.46175e-07	9.6962e-14	0	2.34649e-09	1	1	1	1	1
ARL2BPP10	-0.484106	-0.559938	-0.502488	-0.601842	2.24657e-06	6.48712e-09	9.52111e-07	1.51609e-09	0	-1	-1	-1	0
ARL2BPP9	-0.53938	-0.518266	-0.583351	-0.442737	7.32314e-08	1.26235e-07	4.12268e-09	3.20528e-05	-1	-1	-1	0	0
ARL3	0.724152	0.733866	0.789475	0.183962	2.48975e-15	0	0	0.117597	1	1	1	0	0
ARL4A	0.183692	0.688405	0.711091	0.162566	0.103949	2.74942e-14	1.60895e-14	0.171394	0	1	1	0	0
ARL4C	0.65418	0.807184	0.809463	0.140986	5.61835e-12	0	0	0.241384	1	1	1	0	0
ARL4D	0.480236	0.635702	0.750257	0.288371	2.79105e-06	8.85036e-12	0	0.0104138	0	1	1	0	0
ARL5A	0.272138	0.333102	0.302899	0.299445	0.013047	0.00136834	0.00553366	0.00755249	0	0	0	0	0
ARL5AP1	-0.0873788	0.0734005	0.00751824	0.0555711	0.462747	0.521004	0.95168	0.668237	0	0	0	0	0
ARL5B	0.223004	0.471684	0.533468	0.463965	0.045123	2.25655e-06	1.39228e-07	1.12359e-05	0	0	1	0	0
ARL6	0.798206	0.864866	0.88434	0.516664	0	0	0	5.88824e-07	1	1	1	1	1
ARL6IP1	0.815109	0.820503	0.871002	0.524059	0	0	0	3.73238e-07	1	1	1	1	1
ARL6IP4	0.448133	0.474512	0.477291	0.130083	1.53607e-05	1.92099e-06	3.93974e-06	0.283342	0	0	0	0	0
ARL6IP5	0.726012	0.851873	0.890711	0.8456	1.31544e-15	0	0	0	1	1	1	1	1
ARL6IP6	-0.378102	-0.519076	-0.575758	-0.0645647	0.000359283	1.1964e-07	7.33207e-09	0.614145	0	-1	-1	0	0
ARL8A	0.737283	0.808608	0.839822	0.615474	0	0	0	4.92815e-10	1	1	1	1	1
ARL8B	0.787419	0.841468	0.883399	0.734056	0	0	0	0	1	1	1	1	1
ARMC1	0.640696	0.78203	0.80706	0.672351	2.10124e-11	0	0	2.34125e-12	1	1	1	1	1
ARMC10	0.735314	0.748216	0.794021	0.741517	0	0	0	0	1	1	1	1	1
ARMC10P1	0.208172	0.196444	0.302516	0.372418	0.0628974	0.0697755	0.00559544	0.000647107	0	0	0	0	0
ARMC2	-0.080104	-0.287076	-0.27655	-0.409597	0.503368	0.0064857	0.0119071	0.000144409	0	0	0	0	0
ARMC3	-0.160475	-0.241591	-0.0970925	0.0914628	0.159547	0.0237697	0.408522	0.464384	0	0	0	0	0
ARMC5	-0.30923	-0.19975	-0.399069	-0.394714	0.00429286	0.0648778	0.000168486	0.000268872	0	0	0	0	0
ARMC6	0.368242	0.249785	0.38416	0.0166534	0.00053143	0.0190846	0.000311767	0.903427	0	0	0	0	0
ARMC7	-0.197124	-0.098355	-0.314332	-0.338676	0.0793513	0.383128	0.00386464	0.00217895	0	0	0	0	0
ARMC8	0.682459	0.756493	0.770729	0.66154	2.86786e-13	0	0	7.15786e-12	1	1	1	1	1
ARMC9	0.529758	0.288024	0.456906	-0.114399	1.38595e-07	0.0063008	1.14975e-05	0.351046	1	0	0	0	0
ARMCX1	0.838498	0.813949	0.828248	0.539974	0	0	0	1.34973e-07	1	1	1	1	1
ARMCX2	0.714341	0.739012	0.80565	0.322	7.02289e-15	0	0	0.00377212	1	1	1	0	0
ARMCX3	0.768077	0.817549	0.820447	0.687748	0	0	0	4.52467e-13	1	1	1	1	1
ARMCX4	0.663493	0.694078	0.712798	0.476908	2.18404e-12	1.32278e-14	1.25107e-14	5.69989e-06	1	1	1	0	0
ARMCX5	0.786977	0.811712	0.818872	0.67995	0	0	0	1.06127e-12	1	1	1	1	1
ARMCX5-GPRASP2	0.362638	0.477256	0.463286	0.157032	0.000660635	1.63849e-06	8.29746e-06	0.187748	0	0	0	0	0
ARMCX6	0.607893	0.448098	0.520891	0.508295	4.01223e-10	8.30132e-06	3.10685e-07	9.72437e-07	1	0	1	1	0
ARMT1	0.633425	0.741563	0.77397	0.483487	4.17526e-11	0	0	4.00303e-06	1	1	1	0	0
ARNT	-0.127673	0.200275	0.123292	0.371663	0.270449	0.0641422	0.287836	0.000665794	0	0	0	0	0
ARNT2	0.176548	0.175603	0.25769	-0.25266	0.119164	0.107735	0.019818	0.0268618	0	0	0	0	0
ARNTL	0.246148	0.429904	0.356469	0.0305453	0.02583	2.12741e-05	0.000907285	0.820242	0	0	0	0	0
ARNTL2	0.372181	0.659506	0.718678	0.00684354	0.000455636	7.54093e-13	6.44224e-15	0.961739	0	1	1	0	0
ARPC1A	0.776455	0.842996	0.90331	0.700236	0	0	0	1.10205e-13	1	1	1	1	1
ARPC1B	-0.250792	-0.397824	-0.534661	-0.335167	0.0229385	9.79343e-05	1.28951e-07	0.00245508	0	0	-1	0	0
ARPC2	0.80123	0.828296	0.866533	0.607321	0	0	0	9.71124e-10	1	1	1	1	1
ARPC3	0.824135	0.864354	0.862901	0.844185	0	0	0	0	1	1	1	1	1
ARPC3P1	-0.266962	-0.4045	-0.127257	-0.120858	0.015015	7.22131e-05	0.271761	0.322456	0	0	0	0	0
ARPC4	0.720929	0.704485	0.711367	0.494536	2.48975e-15	3.52187e-15	1.48821e-14	2.17265e-06	1	1	1	0	0
ARPC4-TTLL3	-0.54554	-0.573919	-0.55876	-0.500553	4.80986e-08	2.1758e-09	2.51643e-08	1.53539e-06	-1	-1	-1	-1	-1
ARPC5	0.733725	0.57464	0.540448	0.510182	0	2.05405e-09	8.80587e-08	8.70739e-07	1	1	1	1	1
ARPC5L	0.70966	0.833613	0.858189	0.389704	1.13562e-14	0	0	0.000329449	1	1	1	0	0
ARPIN	-0.338603	-0.446598	-0.425864	-0.337775	0.00159796	8.98949e-06	5.14705e-05	0.00224612	0	0	0	0	0
ARPP19	0.444392	0.60585	0.672046	0.265324	1.85575e-05	1.4649e-10	1.38144e-12	0.019497	0	1	1	0	0
ARPP21	0.494111	0.771121	0.738887	-0.0292729	1.25733e-06	0	0	0.828233	0	1	1	0	0
ARRB1	-0.411435	-0.494322	-0.547547	-0.308988	8.7816e-05	5.88279e-07	5.4582e-08	0.00567264	0	0	-1	0	0
ARRB2	0.341596	0.375043	0.442351	0.166059	0.00143667	0.000264683	2.36139e-05	0.161661	0	0	0	0	0
ARRDC1	-0.504297	-0.617078	-0.640931	-0.690027	6.90046e-07	5.28858e-11	3.0766e-11	3.52562e-13	-1	-1	-1	-1	-1
ARRDC1-AS1	-0.481426	-0.46597	-0.484092	-0.295865	2.61096e-06	3.12619e-06	2.71963e-06	0.00839492	0	0	0	0	0
ARRDC2	-0.188084	-0.319464	-0.497465	-0.0191088	0.0953891	0.00223228	1.2735e-06	0.88912	0	0	0	0	0
ARRDC3	0.0854178	0.147036	0.265842	0.358683	0.473448	0.18279	0.0159874	0.0010768	0	0	0	0	0
ARRDC3-AS1	0.120035	0.160446	0.241037	0.283916	0.302641	0.143954	0.0301453	0.011816	0	0	0	0	0
ARRDC4	-0.135404	-0.302714	-0.24738	-0.0879791	0.241022	0.0039362	0.0257606	0.483092	0	0	0	0	0
ARSA	-0.311658	-0.475219	-0.540135	-0.368108	0.00397187	1.8434e-06	8.98938e-08	0.000762541	0	0	-1	0	0
ARSB	0.300202	0.0934464	-0.205753	0.0684198	0.00569676	0.408061	0.0673139	0.592699	0	0	0	0	0
ARSD	-0.150504	-0.258478	-0.378548	-0.177322	0.189184	0.0150396	0.000390644	0.132732	0	0	0	0	0
ARSDP1	-0.136518	-0.203774	-0.134903	-0.385411	0.23698	0.0593745	0.24269	0.00039124	0	0	0	0	0
ARSF	0.209932	0.0484997	0.0480727	-0.107946	0.060534	0.677875	0.691311	0.381083	0	0	0	0	0
ARSG	0.394786	0.443735	0.366569	0.0185681	0.000180793	1.04532e-05	0.000621689	0.892449	0	0	0	0	0
ARSJ	-0.381352	-0.160465	-0.261141	-0.197198	0.00031469	0.14391	0.0181137	0.0917096	0	0	0	0	0
ARSK	0.317128	0.279199	0.490391	0.233345	0.00332258	0.0082461	1.91044e-06	0.0426183	0	0	0	0	0
ART3	-0.0921129	-0.00687198	0.205344	0.147129	0.436952	0.955099	0.0679109	0.219679	0	0	0	0	0
ARV1	0.811947	0.798253	0.84461	0.854226	0	0	0	0	1	1	1	1	1
ARVCF	-0.31151	-0.42353	-0.408947	-0.509138	0.00399112	2.92168e-05	0.000110091	9.25426e-07	0	0	0	-1	0
AS3MT	-0.22966	0.054911	-0.195968	-0.208473	0.0385904	0.635609	0.0824107	0.0732045	0	0	0	0	0
ASAH1	0.746341	0.613537	0.623494	0.628185	0	7.32063e-11	1.51286e-10	1.6282e-10	1	1	1	1	1
ASAH2B	0.755527	0.840375	0.864548	0.344892	0	0	0	0.00175854	1	1	1	0	0
ASAP1	-0.257597	-0.160942	-0.0341403	-0.325987	0.0192605	0.142738	0.780729	0.00332069	0	0	0	0	0
ASAP1-IT1	-0.501398	-0.427527	-0.426004	-0.0405852	8.19411e-07	2.39521e-05	5.11542e-05	0.757744	-1	0	0	0	0
ASAP1-IT2	-0.640023	-0.675078	-0.683687	-0.587919	2.24329e-11	1.32327e-13	3.906e-13	4.55015e-09	-1	-1	-1	-1	-1
ASAP2	-0.183109	-0.106591	-0.116317	-0.0573871	0.105145	0.342437	0.317999	0.657583	0	0	0	0	0
ASAP3	-0.132745	-0.29758	-0.356631	-0.229897	0.250961	0.00464772	0.000901965	0.0460458	0	0	0	0	0
ASB1	0.145434	0.0679572	0.013179	-0.392096	0.205779	0.553694	0.915416	0.000299498	0	0	0	0	0
ASB11	-0.540465	-0.52296	-0.475298	-0.570352	6.79967e-08	9.23629e-08	4.3902e-06	1.67529e-08	-1	-1	0	-1	0
ASB13	0.353126	0.687952	0.673234	0.260703	0.000944465	2.93071e-14	1.21939e-12	0.0219239	0	1	1	0	0
ASB14	0.124214	0.166876	0.256545	0.361938	0.284593	0.12778	0.0204174	0.000955345	0	0	0	0	0
ASB16-AS1	-0.529671	-0.541248	-0.513029	-0.362833	1.39339e-07	2.57823e-08	5.05504e-07	0.000925332	-1	-1	-1	0	0
ASB2	-0.0191019	0.447766	0.47776	0.012237	0.879847	8.44482e-06	3.84148e-06	0.930476	0	0	0	0	0
ASB3	0.443545	0.494413	0.480465	0.437409	1.93261e-05	5.85038e-07	3.31867e-06	4.11461e-05	0	0	0	0	0
ASB4	-0.207103	-0.486444	-0.493462	-0.0476627	0.0643576	9.51357e-07	1.60384e-06	0.715259	0	0	0	0	0
ASB6	-0.541251	-0.615391	-0.61989	-0.600229	6.44467e-08	6.17912e-11	2.07665e-10	1.72193e-09	-1	-1	-1	-1	-1
ASB7	0.437493	0.572361	0.594625	0.547046	2.60413e-05	2.46845e-09	1.70524e-09	8.49018e-08	0	1	1	1	0
ASB8	0.692998	0.717031	0.78495	0.571362	8.6944e-14	7.56273e-16	0	1.56017e-08	1	1	1	1	1
ASCC1	0.449211	0.114576	0.0262318	0.493974	1.45379e-05	0.305441	0.831856	2.24068e-06	0	0	0	0	0
ASCC2	-0.460694	-0.549552	-0.490024	-0.18049	8.0138e-06	1.40915e-08	1.95124e-06	0.125345	0	-1	0	0	0
ASCC3	0.484446	0.412189	0.404202	0.50648	2.20247e-06	5.03693e-05	0.000135186	1.08373e-06	0	0	0	1	0
ASCL1	-0.385739	-0.527808	-0.517285	-0.55562	0.000263662	6.63477e-08	3.89378e-07	4.76254e-08	0	-1	-1	-1	0
ASF1A	0.541803	0.415399	0.432526	0.631888	6.20315e-08	4.32846e-05	3.77399e-05	1.17132e-10	1	0	0	1	0
ASH1L	0.365672	0.571796	0.532215	0.255732	0.000587432	2.58062e-09	1.50932e-07	0.0248662	0	1	1	0	0
ASH1L-AS1	-0.224432	-0.21748	0.0332197	-0.133784	0.0436665	0.0433037	0.786826	0.268326	0	0	0	0	0
ASH2L	0.774223	0.755421	0.734471	0.532897	0	0	7.1499e-16	2.13797e-07	1	1	1	1	1
ASIC1	-0.612907	-0.521708	-0.584332	-0.584407	2.61026e-10	1.00512e-07	3.82442e-09	5.89924e-09	-1	-1	-1	-1	-1
ASIC2	0.508361	0.786042	0.786622	0.000237486	5.38896e-07	0	0	0.998889	1	1	1	0	0
ASIC3	-0.349681	-0.295409	-0.272959	-0.24945	0.00107197	0.00498644	0.0131779	0.0290991	0	0	0	0	0
ASIC4	-0.47855	-0.348774	-0.461052	-0.564721	3.06009e-06	0.000761489	9.3041e-06	2.50329e-08	0	0	0	-1	0
ASL	0.357976	0.364295	0.296134	0.192375	0.000789076	0.000412129	0.00678146	0.100726	0	0	0	0	0
ASLP1	-0.746222	-0.725492	-0.765461	-0.720941	0	0	0	1.04399e-14	-1	-1	-1	-1	-1
ASMTL	0.490925	0.407756	0.496531	0.188047	1.51302e-06	6.20547e-05	1.34459e-06	0.109131	0	0	0	0	0
ASMTL-AS1	-0.81297	-0.778246	-0.786016	-0.832008	0	0	0	0	-1	-1	-1	-1	-1
ASNA1	0.813183	0.844416	0.842288	0.709528	0	0	0	3.74965e-14	1	1	1	1	1
ASNS	0.80208	0.887493	0.893252	0.489725	0	0	0	2.83666e-06	1	1	1	0	0
ASNSD1	0.701773	0.711063	0.757449	0.716087	3.16134e-14	1.44989e-15	0	1.52316e-14	1	1	1	1	1
ASPA	0.135665	0.0215038	0.0151687	0.313978	0.240113	0.856335	0.902525	0.00486459	0	0	0	0	0
ASPDH	0.147386	0.247012	0.183082	-0.162461	0.199325	0.0205706	0.106236	0.171663	0	0	0	0	0
ASPH	0.553905	0.356336	0.32007	0.185077	2.69161e-08	0.000566605	0.0032129	0.115257	1	0	0	0	0
ASPHD1	-0.330034	-0.254765	-0.245456	-0.547439	0.0021546	0.0166619	0.0270273	8.27171e-08	0	0	0	-1	0
ASPHD2	0.386268	0.466319	0.424184	0.021838	0.00025808	3.06457e-06	5.55475e-05	0.872757	0	0	0	0	0
ASPRV1	-0.641728	-0.612885	-0.685151	-0.109568	1.90419e-11	7.77183e-11	3.31759e-13	0.373508	-1	-1	-1	0	0
ASPSCR1	-0.069269	0.0464555	-0.0555566	-0.144622	0.565311	0.691329	0.645083	0.228408	0	0	0	0	0
ASRGL1	0.265155	-0.302558	-0.451325	-0.241759	0.0157554	0.00395499	1.51896e-05	0.0349857	0	0	0	0	0
ASS1	0.553735	0.610839	0.735259	0.364052	2.72391e-08	9.35996e-11	7.1499e-16	0.000884016	1	1	1	0	0
ASS1P10	0.174746	0.402829	0.404216	0.0967463	0.123286	7.80694e-05	0.000135118	0.436877	0	0	0	0	0
ASTE1	0.296563	0.22603	0.343143	0.403074	0.00637733	0.0352984	0.00146749	0.000190491	0	0	0	0	0
ASTN1	0.648181	0.526504	0.529736	-0.0821218	1.01416e-11	7.2529e-08	1.76957e-07	0.514971	1	1	1	0	0
ASTN2	-0.219546	0.0919737	0.0835322	0.0514398	0.048795	0.415999	0.480761	0.692691	0	0	0	0	0
ASUN	0.296537	0.101296	0.144481	0.440835	0.00638162	0.368373	0.20901	3.50199e-05	0	0	0	0	0
ASXL1	-0.397055	-0.28213	-0.323404	-0.0184468	0.000164089	0.00754336	0.00287858	0.893342	0	0	0	0	0
ASXL2	-0.491244	-0.683128	-0.70986	-0.410317	1.48499e-06	5.20722e-14	1.84472e-14	0.000140176	0	-1	-1	0	0
ASXL3	-0.214345	0.0102053	0.0333576	-0.248972	0.0548383	0.932559	0.786011	0.0294286	0	0	0	0	0
ATAD1	0.846737	0.876797	0.868325	0.774424	0	0	0	0	1	1	1	1	1
ATAD2	0.352235	0.45054	0.427622	-0.0866804	0.000976211	7.29069e-06	4.74434e-05	0.490054	0	0	0	0	0
ATAD2B	-0.31214	-0.402471	-0.546652	0.00470401	0.00391006	7.93427e-05	5.79839e-08	0.973673	0	0	-1	0	0
ATAD3A	0.0958366	0.0262556	0.0647899	-0.117844	0.417525	0.824833	0.588989	0.335617	0	0	0	0	0
ATAD3B	-0.327566	-0.202044	-0.264878	-0.337666	0.00234468	0.0617124	0.0164066	0.00225439	0	0	0	0	0
ATAD3C	-0.586923	-0.588383	-0.586712	-0.327034	2.24843e-09	6.65105e-10	3.18107e-09	0.00320952	-1	-1	-1	0	0
ATAD5	-0.281626	-0.320946	-0.308661	-0.079106	0.00996975	0.00211926	0.0046217	0.531948	0	0	0	0	0
ATAT1	-0.166198	-0.364026	-0.541896	-0.257831	0.144109	0.000416639	7.99278e-08	0.0235728	0	0	-1	0	0
ATCAY	0.359081	0.598473	0.602021	-0.144345	0.000756845	2.79632e-10	9.36013e-10	0.229328	0	1	1	0	0
ATE1	0.692903	0.791399	0.834208	0.73369	8.77909e-14	0	0	0	1	1	1	1	1
ATE1-AS1	-0.267072	-0.486053	-0.42879	-0.271578	0.0149688	9.73744e-07	4.50038e-05	0.0164997	0	0	0	0	0
ATF1	-0.223825	-0.218045	-0.240577	-0.0843256	0.0442793	0.0427312	0.0304876	0.502788	0	0	0	0	0
ATF1P1	-0.295376	-0.314805	-0.22189	-0.246298	0.00661754	0.00262036	0.0473007	0.0314136	0	0	0	0	0
ATF2	0.701676	0.77798	0.806975	0.588991	3.16134e-14	0	0	4.18793e-09	1	1	1	1	1
ATF3	0.0831591	0.119622	0.0830492	0.331145	0.486394	0.283751	0.483495	0.00280127	0	0	0	0	0
ATF4	0.107459	0.151485	0.11004	0.2444	0.358838	0.169225	0.346364	0.0328758	0	0	0	0	0
ATF5	-0.153731	-0.160098	-0.167459	-0.194794	0.179156	0.144912	0.141879	0.0960763	0	0	0	0	0
ATF6	0.623898	0.545013	0.493048	0.57832	9.91207e-11	1.96011e-08	1.64165e-06	9.35342e-09	1	1	0	1	0
ATF6B	-0.249186	-0.542351	-0.346977	-0.382006	0.0239033	2.37957e-08	0.001282	0.000447173	0	-1	0	0	0
ATF7	-0.701128	-0.739616	-0.748071	-0.170074	3.3506e-14	0	0	0.150784	-1	-1	-1	0	0
ATF7IP	-0.194237	-0.365848	-0.324422	-0.0214047	0.0842402	0.000387161	0.00278393	0.875362	0	0	0	0	0
ATF7IP2	0.228145	0.338897	0.350756	-0.184987	0.039986	0.00110635	0.00111784	0.115433	0	0	0	0	0
ATG10	0.123643	0.337604	0.148572	0.0431555	0.286953	0.00115975	0.195655	0.741968	0	0	0	0	0
ATG101	0.468627	0.595636	0.62871	0.465814	5.26439e-06	3.57857e-10	9.50502e-11	1.02186e-05	0	1	1	0	0
ATG12	0.623718	0.62997	0.72014	0.749658	1.00808e-10	1.5568e-11	5.21357e-15	0	1	1	1	1	1
ATG12P1	-0.297439	-0.508439	-0.546681	-0.124384	0.00620793	2.41234e-07	5.78848e-08	0.306973	0	-1	-1	0	0
ATG12P2	-0.728862	-0.648493	-0.69327	-0.446826	0	2.43122e-12	1.32453e-13	2.63779e-05	-1	-1	-1	0	0
ATG13	0.426163	0.501034	0.488895	0.501408	4.47393e-05	3.86516e-07	2.0799e-06	1.46167e-06	0	1	0	1	0
ATG14	0.40309	0.523808	0.541239	0.495022	0.000126672	8.72207e-08	8.35566e-08	2.11313e-06	0	1	1	0	0
ATG16L1	0.694348	0.824121	0.892146	0.546558	7.44639e-14	0	0	8.76657e-08	1	1	1	1	1
ATG16L2	-0.560982	-0.549227	-0.573966	-0.423821	1.61116e-08	1.44295e-08	8.36671e-09	7.7e-05	-1	-1	-1	0	0
ATG2A	-0.343777	-0.482911	-0.483251	-0.436662	0.00132907	1.17503e-06	2.84924e-06	4.26649e-05	0	0	0	0	0
ATG2B	0.79327	0.857133	0.873944	0.759166	0	0	0	0	1	1	1	1	1
ATG3	0.769512	0.787746	0.754042	0.627246	0	0	0	1.77103e-10	1	1	1	1	1
ATG4A	0.550724	0.212707	0.378866	0.520904	3.36082e-08	0.0484569	0.000385935	4.54443e-07	1	0	0	1	0
ATG4B	-0.273341	-0.177986	-0.205899	-0.232814	0.0126133	0.102813	0.0671048	0.0431233	0	0	0	0	0
ATG4C	0.0460967	0.0541763	0.062566	0.232428	0.706594	0.640086	0.602426	0.0434977	0	0	0	0	0
ATG4D	-0.198932	0.134444	-0.0504679	-0.150133	0.076495	0.225456	0.676336	0.209727	0	0	0	0	0
ATG5	0.711341	0.79609	0.859382	0.631776	9.19745e-15	0	0	1.18341e-10	1	1	1	1	1
ATG7	0.556331	0.53959	0.692593	0.433091	2.26144e-08	2.90585e-08	1.42964e-13	5.04816e-05	1	1	1	0	0
ATG9A	0.169197	0.0817848	0.117058	-0.0213237	0.136494	0.472655	0.314613	0.875848	0	0	0	0	0
ATHL1	-0.377188	-0.581606	-0.595867	-0.477176	0.000372941	1.1649e-09	1.54416e-09	5.6179e-06	0	-1	-1	0	0
ATIC	0.226383	-0.178547	-0.178949	-0.0789133	0.0416829	0.101635	0.114974	0.533091	0	0	0	0	0
ATL1	0.870992	0.919322	0.945852	0.771215	0	0	0	0	1	1	1	1	1
ATL2	0.640929	0.726388	0.742856	0.129228	2.05518e-11	0	0	0.286712	1	1	1	0	0
ATL3	-0.379086	-0.498759	-0.530381	0.121257	0.000345346	4.46075e-07	1.69803e-07	0.320633	0	0	-1	0	0
ATM	-0.0988805	-0.271247	-0.136822	0.234373	0.401644	0.0104274	0.235712	0.0416046	0	0	0	0	0
ATMIN	0.786003	0.775784	0.828416	0.610202	0	0	0	7.65544e-10	1	1	1	1	1
ATN1	-0.831228	-0.791432	-0.838347	-0.81981	0	0	0	0	-1	-1	-1	-1	-1
ATOH8	-0.646454	-0.754244	-0.768016	-0.585095	1.20322e-11	0	0	5.59405e-09	-1	-1	-1	-1	-1
ATOX1	0.620846	0.551619	0.600452	0.544792	1.29803e-10	1.21159e-08	1.06488e-09	9.86022e-08	1	1	1	1	1
ATP10A	-0.625544	-0.712194	-0.666999	-0.719091	8.55187e-11	1.44989e-15	2.34099e-12	1.04399e-14	-1	-1	-1	-1	-1
ATP10B	0.114687	-0.195984	-0.18963	0.283378	0.325664	0.0704607	0.0935373	0.0119891	0	0	0	0	0
ATP10D	-0.438314	-0.677867	-0.687063	-0.25839	2.50168e-05	9.58186e-14	2.67005e-13	0.0232327	0	-1	-1	0	0
ATP11A	-0.655748	-0.643347	-0.649476	0.0147314	4.81876e-12	4.11393e-12	1.36121e-11	0.915426	-1	-1	-1	0	0
ATP11A-AS1	-0.71423	-0.631596	-0.653686	0.0167337	7.02289e-15	1.32767e-11	8.98959e-12	0.903048	-1	-1	-1	0	0
ATP11B	0.385796	0.531254	0.58567	0.537753	0.000263117	5.22715e-08	3.44997e-09	1.56413e-07	0	1	1	1	0
ATP11C	-0.157927	-0.423614	-0.517114	0.150022	0.166643	2.9096e-05	3.93556e-07	0.210061	0	0	-1	0	0
ATP13A1	-0.4406	-0.491548	-0.557938	-0.542934	2.23625e-05	6.97846e-07	2.6655e-08	1.11159e-07	0	0	-1	-1	0
ATP13A2	0.0749679	0.219291	0.233032	-0.212172	0.532647	0.0415149	0.0365198	0.0677529	0	0	0	0	0
ATP13A3	0.551866	0.673169	0.718356	0.570503	3.11096e-08	1.64678e-13	6.44224e-15	1.65963e-08	1	1	1	1	1
ATP13A4	-0.0604672	-0.480927	-0.511302	-0.342596	0.618004	1.32008e-06	5.6151e-07	0.00190539	0	0	-1	0	0
ATP1A1	0.753689	0.851083	0.882928	0.479438	0	0	0	4.98465e-06	1	1	1	0	0
ATP1A1-AS1	-0.493191	-0.378253	-0.333713	0.0727421	1.32733e-06	0.00023098	0.00203644	0.567399	0	0	0	0	0
ATP1A2	-0.437684	-0.733339	-0.696639	-0.578349	2.58012e-05	0	9.03384e-14	9.33929e-09	0	-1	-1	-1	0
ATP1A3	0.656287	0.697359	0.730513	0.0540174	4.56125e-12	9.39328e-15	1.37341e-15	0.677737	1	1	1	0	0
ATP1B1	0.846185	0.913647	0.929441	0.85146	0	0	0	0	1	1	1	1	1
ATP1B1P1	-0.12843	-0.0307873	-0.195339	-0.0420525	0.267498	0.793887	0.0834445	0.748669	0	0	0	0	0
ATP1B2	-0.65649	-0.76108	-0.795419	-0.70335	4.47032e-12	0	0	7.54559e-14	-1	-1	-1	-1	-1
ATP1B3	0.440939	0.725715	0.62096	0.421296	2.19978e-05	0	1.89092e-10	8.64211e-05	0	1	1	0	0
ATP2A2	0.737772	0.791359	0.845767	0.384498	0	0	0	0.000405304	1	1	1	0	0
ATP2B1	0.832829	0.890736	0.902605	0.274503	0	0	0	0.0152624	1	1	1	0	0
ATP2B2	0.550641	0.593642	0.666265	-0.0596252	3.37918e-08	4.24287e-10	2.52824e-12	0.644257	1	1	1	0	0
ATP2B3	0.492824	0.632187	0.652166	-0.0392754	1.35587e-06	1.25301e-11	1.04498e-11	0.766008	0	1	1	0	0
ATP2B4	0.30376	0.210161	0.365791	0.00746195	0.00510327	0.051403	0.000639929	0.957994	0	0	0	0	0
ATP2C1	0.695056	0.700336	0.769263	0.676225	6.92526e-14	6.17437e-15	0	1.56382e-12	1	1	1	1	1
ATP5A1	0.869592	0.885593	0.90044	0.59056	0	0	0	3.70797e-09	1	1	1	1	1
ATP5B	0.849309	0.888673	0.910251	0.704103	0	0	0	6.93023e-14	1	1	1	1	1
ATP5C1	0.864163	0.864774	0.874772	0.767041	0	0	0	0	1	1	1	1	1
ATP5D	0.0202639	0.0547625	0.0456001	-0.295672	0.872513	0.636334	0.706767	0.00844074	0	0	0	0	0
ATP5E	0.758267	0.769514	0.747908	0.697884	0	0	0	1.43173e-13	1	1	1	1	1
ATP5F1	0.831546	0.82911	0.839893	0.759744	0	0	0	0	1	1	1	1	1
ATP5F1P1	-0.402485	-0.488908	-0.293039	0.0930128	0.000130073	8.20195e-07	0.00742788	0.455901	0	0	0	0	0
ATP5G1	0.845732	0.874601	0.868836	0.715432	0	0	0	1.75407e-14	1	1	1	1	1
ATP5G2	0.6409	0.679135	0.714822	0.567339	2.06069e-11	8.21835e-14	1.01153e-14	2.0817e-08	1	1	1	1	1
ATP5G2P3	-0.302821	-0.259881	-0.147568	0.0154577	0.00525429	0.0144607	0.198862	0.911133	0	0	0	0	0
ATP5G3	0.873152	0.888117	0.905517	0.631624	0	0	0	1.19968e-10	1	1	1	1	1
ATP5H	0.870251	0.895561	0.911605	0.777337	0	0	0	0	1	1	1	1	1
ATP5HP4	-0.26808	-0.0997296	-0.25797	-0.138383	0.0145612	0.376316	0.019674	0.250782	0	0	0	0	0
ATP5I	0.814377	0.763426	0.755539	0.465182	0	0	0	1.05563e-05	1	1	1	0	0
ATP5J	0.750036	0.824262	0.80839	0.68357	0	0	0	7.13478e-13	1	1	1	1	1
ATP5J2	0.863705	0.88032	0.87807	0.684333	0	0	0	6.54794e-13	1	1	1	1	1
ATP5J2-PTCD1	-0.103589	-0.110277	-0.10003	-0.0971648	0.377731	0.324943	0.394085	0.43479	0	0	0	0	0
ATP5L	0.848645	0.876987	0.877972	0.761296	0	0	0	0	1	1	1	1	1
ATP5O	0.842031	0.877092	0.88261	0.699246	0	0	0	1.23457e-13	1	1	1	1	1
ATP5S	0.36102	0.519304	0.458002	0.411622	0.000702385	1.17882e-07	1.08736e-05	0.000132329	0	1	0	0	0
ATP5SL	0.254981	0.271791	0.411912	0.0740623	0.0205963	0.0102668	9.65103e-05	0.559733	0	0	0	0	0
ATP6	-0.476804	-0.417279	-0.404129	-0.472522	3.37115e-06	3.95491e-05	0.000135596	7.19988e-06	0	0	0	0	0
ATP6AP1	0.804826	0.864248	0.878322	0.776514	0	0	0	0	1	1	1	1	1
ATP6AP1L	0.0427445	0.0437884	-0.0204798	0.0320275	0.728319	0.708771	0.868802	0.810757	0	0	0	0	0
ATP6AP2	0.833599	0.89731	0.933584	0.784686	0	0	0	0	1	1	1	1	1
ATP6V0A1	0.785311	0.855773	0.877482	0.487457	0	0	0	3.21475e-06	1	1	1	0	0
ATP6V0A2	-0.102326	-0.184792	-0.189452	0.222976	0.384363	0.0894114	0.093849	0.0537284	0	0	0	0	0
ATP6V0B	0.742845	0.812984	0.844092	0.775936	0	0	0	0	1	1	1	1	1
ATP6V0C	0.259138	0.395617	0.444863	-0.036936	0.0184977	0.000108248	2.08636e-05	0.78093	0	0	0	0	0
ATP6V0D1	0.732927	0.870144	0.887633	0.582193	0	0	0	7e-09	1	1	1	1	1
ATP6V0E1	0.242491	-0.314114	-0.245738	0.455429	0.028315	0.00268301	0.0268367	1.7197e-05	0	0	0	0	0
ATP6V0E1P1	-0.26708	-0.0452669	-0.179843	-0.324177	0.0149666	0.699217	0.113119	0.00351817	0	0	0	0	0
ATP6V0E2	0.350087	0.496402	0.456214	-0.0453559	0.00105625	5.16999e-07	1.19085e-05	0.72925	0	0	0	0	0
ATP6V0E2-AS1	-0.188208	-0.121446	-0.0601891	-0.00824859	0.0951597	0.275983	0.617132	0.953569	0	0	0	0	0
ATP6V1A	0.827126	0.900286	0.917238	0.477657	0	0	0	5.47356e-06	1	1	1	0	0
ATP6V1B2	0.835497	0.9133	0.921802	0.515698	0	0	0	6.25142e-07	1	1	1	1	1
ATP6V1C1	0.821814	0.881518	0.896102	0.390347	0	0	0	0.000321215	1	1	1	0	0
ATP6V1D	0.878742	0.914539	0.944077	0.694773	0	0	0	2.05755e-13	1	1	1	1	1
ATP6V1E1	0.885285	0.922132	0.947283	0.850254	0	0	0	0	1	1	1	1	1
ATP6V1E2	0.0813471	0.262449	0.21219	0.138201	0.49624	0.0134462	0.0585984	0.251462	0	0	0	0	0
ATP6V1F	0.782553	0.860827	0.873921	0.500897	0	0	0	1.50558e-06	1	1	1	1	1
ATP6V1G1	0.752962	0.781297	0.82323	0.657625	0	0	0	1.05477e-11	1	1	1	1	1
ATP6V1G1P4	-0.175145	-0.206869	-0.386865	-0.332858	0.122339	0.0554001	0.000279669	0.00264727	0	0	0	0	0
ATP6V1G1P7	-0.124104	-0.0528503	-0.15398	-0.0403666	0.285067	0.648718	0.178987	0.759073	0	0	0	0	0
ATP6V1G2	0.811265	0.906777	0.907087	0.323186	0	0	0	0.00363431	1	1	1	0	0
ATP6V1G2-DDX39B	0.258244	0.203492	0.327388	-0.000965403	0.0189394	0.0597544	0.00252259	0.995104	0	0	0	0	0
ATP6V1H	0.848001	0.886807	0.930143	0.475747	0	0	0	6.06457e-06	1	1	1	0	0
ATP7A	0.29299	0.13692	0.0960276	0.361983	0.00711359	0.216506	0.414095	0.000954012	0	0	0	0	0
ATP7B	0.0934028	-0.46358	-0.451875	-0.470929	0.430233	3.57271e-06	1.47918e-05	7.83071e-06	0	0	0	0	0
ATP8	-0.38033	-0.326552	-0.298768	-0.421069	0.000328122	0.0017369	0.00626221	8.73301e-05	0	0	0	0	0
ATP8A1	0.833738	0.872247	0.902815	0.689059	0	0	0	3.93282e-13	1	1	1	1	1
ATP8A2	0.70888	0.864623	0.871874	0.169938	1.34204e-14	0	0	0.151091	1	1	1	0	0
ATP8A2P2	-0.493049	-0.532692	-0.554543	-0.269753	1.33884e-06	4.73256e-08	3.36884e-08	0.0173339	0	-1	-1	0	0
ATP8B1	-0.318718	-0.0500614	-0.134595	-0.326424	0.00315383	0.667472	0.24385	0.0032739	0	0	0	0	0
ATP8B2	-0.304377	-0.309858	-0.345699	-0.398497	0.0050049	0.00310112	0.00134071	0.000230466	0	0	0	0	0
ATP8B4	0.389579	0.192141	0.0590394	0.25866	0.000225003	0.0765822	0.62421	0.023094	0	0	0	0	0
ATP9A	0.766611	0.851482	0.87638	0.530977	0	0	0	2.41905e-07	1	1	1	1	1
ATP9B	0.0467874	0.108489	-0.128477	-0.207247	0.702313	0.333317	0.266958	0.0750931	0	0	0	0	0
ATPAF1	0.626994	0.549187	0.552377	0.520634	7.50716e-11	1.44715e-08	3.9142e-08	4.62091e-07	1	1	1	1	1
ATPAF2	-0.550525	-0.441704	-0.446441	-0.451818	3.40375e-08	1.16373e-05	1.93288e-05	2.05836e-05	-1	0	0	0	0
ATPIF1	0.857009	0.868115	0.90683	0.580712	0	0	0	7.82508e-09	1	1	1	1	1
ATR	0.714761	0.751916	0.803417	0.628565	7.02289e-15	0	0	1.57242e-10	1	1	1	1	1
ATRAID	0.506675	0.361463	0.355022	0.528898	5.96075e-07	0.000461883	0.000957128	2.7602e-07	1	0	0	1	0
ATRIP	0.0540655	-0.118485	0.00681834	0.104901	0.657607	0.288525	0.956315	0.395794	0	0	0	0	0
ATRN	0.844703	0.858574	0.895019	0.770765	0	0	0	0	1	1	1	1	1
ATRNL1	0.512401	0.791665	0.814304	0.143686	4.19787e-07	0	0	0.231641	1	1	1	0	0
ATRX	0.663153	0.534681	0.461416	0.0494957	2.2627e-12	4.11693e-08	9.132e-06	0.704218	1	1	0	0	0
ATXN1	-0.216628	-0.0480868	0.0864917	-0.197518	0.0520965	0.680576	0.464553	0.0911526	0	0	0	0	0
ATXN10	0.81173	0.816928	0.8648	0.634924	0	0	0	8.90136e-11	1	1	1	1	1
ATXN1L	-0.405494	-0.53034	-0.557915	-0.286313	0.00011412	5.57179e-08	2.66959e-08	0.0110399	0	-1	-1	0	0
ATXN2	-0.111965	-0.0901102	-0.110971	-0.114913	0.337739	0.426137	0.342136	0.348716	0	0	0	0	0
ATXN2L	-0.685558	-0.652639	-0.620699	-0.688262	2.02898e-13	1.57296e-12	1.93363e-10	4.29677e-13	-1	-1	-1	-1	-1
ATXN3	0.118321	0.526049	0.587912	0.215181	0.309949	7.48035e-08	2.90165e-09	0.0636266	0	1	1	0	0
ATXN7	-0.460765	-0.52136	-0.55777	-0.374035	7.98297e-06	1.02936e-07	2.6958e-08	0.000608505	0	-1	-1	0	0
ATXN7L1	-0.358634	-0.42761	-0.437352	-0.4093	0.000769267	2.38667e-05	3.00299e-05	0.000146294	0	0	0	0	0
ATXN7L2	-0.37072	-0.491054	-0.464506	-0.430491	0.000482172	7.19447e-07	7.78709e-06	5.686e-05	0	0	0	0	0
ATXN7L3	0.14495	0.581811	0.494721	-0.119557	0.207377	1.14537e-09	1.49191e-06	0.328165	0	1	0	0	0
ATXN7L3B	0.828122	0.838615	0.876109	0.609786	0	0	0	7.91666e-10	1	1	1	1	1
AUH	0.766294	0.700907	0.798704	0.759311	0	5.50424e-15	0	0	1	1	1	1	1
AUP1	0.0271425	-0.161624	-0.0871422	0.201589	0.828229	0.140974	0.461102	0.0840427	0	0	0	0	0
AURKAIP1	0.491938	0.459229	0.534728	0.129816	1.42691e-06	4.5453e-06	1.28422e-07	0.284343	0	0	1	0	0
AURKAPS1	-0.401207	-0.362253	-0.108215	-0.104632	0.000137296	0.000447494	0.354801	0.39706	0	0	0	0	0
AURKAPS2	-0.460378	-0.641098	-0.596918	-0.506262	8.14944e-06	5.16919e-12	1.41921e-09	1.0977e-06	0	-1	-1	-1	0
AUTS2	-0.630672	-0.800524	-0.714072	-0.679085	5.36339e-11	0	1.13194e-14	1.15958e-12	-1	-1	-1	-1	-1
AVEN	-0.0535033	-0.0705178	-0.0382939	-0.0873782	0.661293	0.538176	0.753883	0.486224	0	0	0	0	0
AVIL	-0.537299	-0.471329	-0.414859	-0.401423	8.42696e-08	2.30268e-06	8.46098e-05	0.000204274	-1	0	0	0	0
AVL9	0.834169	0.839399	0.851641	0.505062	0	0	0	1.18002e-06	1	1	1	1	1
AVPI1	0.601448	0.71388	0.61966	0.414212	6.90626e-10	1.44989e-15	2.11973e-10	0.000118157	1	1	1	0	0
AXIN1	-0.529656	-0.537316	-0.624024	-0.467761	1.39452e-07	3.41788e-08	1.44218e-10	9.25136e-06	-1	-1	-1	0	0
AXIN2	-0.247951	-0.219389	-0.428891	-0.422844	0.0246611	0.0414234	4.47952e-05	8.04181e-05	0	0	0	0	0
AXL	-0.466172	-0.802156	-0.801498	-0.604484	6.003e-06	0	0	1.2245e-09	0	-1	-1	-1	0
AZGP1	-0.0878375	-0.175304	-0.230388	0.14151	0.460288	0.108347	0.0388885	0.239362	0	0	0	0	0
AZGP1P1	-0.181508	-0.153149	-0.294575	0.0065026	0.108392	0.164239	0.0070965	0.963646	0	0	0	0	0
AZI2	0.734597	0.722655	0.730738	0.360751	0	0	1.37341e-15	0.000997722	1	1	1	0	0
AZIN1	0.652413	0.742543	0.811076	0.682376	6.69327e-12	0	0	8.12115e-13	1	1	1	1	1
AZIN2	0.408951	0.50672	0.567307	0.377866	9.8003e-05	2.69326e-07	1.36276e-08	0.000525207	0	1	1	0	0
B2M	0.314814	0.0713365	-0.024865	0.389381	0.0035813	0.533398	0.840592	0.00033372	0	0	0	0	0
B3GALNT1	0.765099	0.782608	0.832293	0.302538	0	0	0	0.0068989	1	1	1	0	0
B3GALNT1P1	-0.0394213	0.097675	0.309877	0.186858	0.749909	0.386609	0.00445019	0.11157	0	0	0	0	0
B3GALNT2	0.283568	0.16065	0.19616	-0.13662	0.0094228	0.143426	0.0821045	0.257365	0	0	0	0	0
B3GALT1	0.689489	0.619419	0.664464	0.0529693	1.30215e-13	4.24998e-11	3.04526e-12	0.683967	1	1	1	0	0
B3GALT2	0.619963	0.751201	0.708807	0.366569	1.40352e-10	0	2.07752e-14	0.000805786	1	1	1	0	0
B3GALT4	0.0873288	-0.029527	0.0100132	0.0167133	0.463003	0.802376	0.935899	0.903109	0	0	0	0	0
B3GALT5	0.0706508	-0.309957	-0.3157	-0.140759	0.557062	0.00309124	0.00370259	0.242171	0	0	0	0	0
B3GALT5-AS1	0.183796	-0.354929	-0.346471	-0.163877	0.103748	0.00059877	0.00130523	0.167677	0	0	0	0	0
B3GALT6	0.307582	0.473037	0.35278	0.174749	0.00452519	2.08938e-06	0.00103819	0.138855	0	0	0	0	0
B3GALTL	-0.0242716	0.470652	0.32362	0.175803	0.846712	2.39651e-06	0.00285893	0.136265	0	0	0	0	0
B3GAT1	-0.492528	-0.80673	-0.814581	-0.551168	1.37895e-06	0	0	6.43407e-08	0	-1	-1	-1	0
B3GAT2	0.139647	-0.276212	-0.228025	0.011989	0.225654	0.00902255	0.0410994	0.93197	0	0	0	0	0
B3GAT3	0.122412	0.247433	0.227907	0.131401	0.292189	0.0203406	0.0412081	0.277878	0	0	0	0	0
B3GNT2	0.286989	0.457567	0.442693	0.228506	0.008518	4.97544e-06	2.32133e-05	0.0475071	0	0	0	0	0
B3GNT4	0.241311	0.261137	0.151633	-0.0585813	0.0291552	0.0139498	0.186216	0.650543	0	0	0	0	0
B3GNT5	-0.155679	-0.183776	-0.166076	0.0207859	0.173377	0.0912886	0.145352	0.879159	0	0	0	0	0
B3GNT7	-0.384766	-0.413086	-0.46769	-0.350131	0.000273954	4.83283e-05	6.58768e-06	0.00146362	0	0	0	0	0
B3GNT9	-0.11543	-0.0721258	-0.227872	0.207085	0.322309	0.528633	0.0412377	0.0753308	0	0	0	0	0
B3GNTL1	-0.0636201	-0.300713	-0.187338	-0.338868	0.599095	0.0041978	0.0977998	0.00216532	0	0	0	0	0
B4GALNT1	0.413455	0.41695	0.483041	-0.0721295	8.0141e-05	4.01866e-05	2.88243e-06	0.571191	0	0	0	0	0
B4GALNT3	-0.347988	-0.413824	-0.376485	-0.37751	0.00114048	4.66494e-05	0.000424106	0.000532504	0	0	0	0	0
B4GALNT4	-0.502503	-0.540058	-0.614874	-0.603615	7.6703e-07	2.80928e-08	3.19319e-10	1.31597e-09	-1	-1	-1	-1	-1
B4GALT1	-0.387866	-0.545244	-0.615245	-0.273629	0.000241535	1.92834e-08	3.09351e-10	0.0156143	0	-1	-1	0	0
B4GALT2	-0.444338	-0.249283	-0.349524	-0.494006	1.86056e-05	0.0193439	0.00116973	2.2369e-06	0	0	0	0	0
B4GALT3	0.0217319	0.244236	0.189523	-0.0630591	0.86304	0.0221631	0.0937263	0.623164	0	0	0	0	0
B4GALT4	0.434955	-0.00390585	0.0973141	0.354196	2.94921e-05	0.974671	0.407458	0.00126537	0	0	0	0	0
B4GALT5	0.462505	0.768477	0.777277	0.239195	7.28347e-06	0	0	0.0372043	0	1	1	0	0
B4GALT6	0.659709	0.837608	0.828789	0.161568	3.22486e-12	0	0	0.174106	1	1	1	0	0
B4GALT7	-0.153296	0.0213118	0.0125018	-0.255766	0.180485	0.857566	0.919454	0.0248471	0	0	0	0	0
B4GAT1	0.815621	0.863593	0.876742	0.434304	0	0	0	4.77039e-05	1	1	1	0	0
B9D1	0.465726	0.354908	0.321226	-0.139509	6.14615e-06	0.000599222	0.00309427	0.246716	0	0	0	0	0
B9D2	-0.0619022	-0.117443	-0.161114	-0.311774	0.609514	0.293005	0.158505	0.00520568	0	0	0	0	0
bA255A11.4	-0.300011	-0.241946	-0.124449	0.222366	0.00573099	0.0235604	0.282977	0.0544412	0	0	0	0	0
BAALC	0.404017	0.203303	0.192419	-0.066182	0.000121708	0.0600092	0.0884675	0.605774	0	0	0	0	0
BAALC-AS1	0.23752	0.0971015	0.0577116	0.0419849	0.0319819	0.389547	0.632242	0.749057	0	0	0	0	0
BAATP1	-0.578666	-0.596631	-0.645317	-0.515532	4.2784e-09	3.28477e-10	2.03156e-11	6.31347e-07	-1	-1	-1	-1	-1
BABAM1	0.821385	0.842881	0.841852	0.390376	0	0	0	0.000320891	1	1	1	0	0
BACE1	0.624253	0.524459	0.554759	0.457785	9.60522e-11	8.34067e-08	3.31903e-08	1.53355e-05	1	1	1	0	0
BACE1-AS	-0.561021	-0.473122	-0.447595	-0.373166	1.60669e-08	2.07939e-06	1.82668e-05	0.000629475	-1	0	0	0	0
BACE2	-0.527713	-0.510502	-0.578465	-0.405027	1.58352e-07	2.1082e-07	5.98414e-09	0.000175649	-1	-1	-1	0	0
BACH1	0.385354	0.416365	0.265875	0.0913792	0.000267741	4.13449e-05	0.0159739	0.464738	0	0	0	0	0
BACH2	-0.401475	-0.195888	-0.240321	0.118914	0.000135718	0.0706025	0.0306757	0.331036	0	0	0	0	0
BAD	-0.00119731	-0.0747636	-0.126201	-0.324216	0.992943	0.512986	0.275999	0.00351418	0	0	0	0	0
BAG1	0.40382	0.529458	0.502975	0.197238	0.00012274	5.9208e-08	9.25036e-07	0.0916437	0	1	1	0	0
BAG2	0.0252411	-0.0486573	0.0769926	0.0292875	0.840382	0.676778	0.518113	0.828166	0	0	0	0	0
BAG3	-0.373807	-0.587055	-0.537814	-0.199708	0.000427148	7.43217e-10	1.04994e-07	0.0872695	0	-1	-1	0	0
BAG4	0.758783	0.821747	0.856022	0.353719	0	0	0	0.00128726	1	1	1	0	0
BAG5	0.756494	0.841724	0.860128	0.776098	0	0	0	0	1	1	1	1	1
BAG6	-0.422982	-0.22839	-0.31322	-0.362592	5.19438e-05	0.0332675	0.00400262	0.000933895	0	0	0	0	0
BAHCC1	-0.666456	-0.716098	-0.721646	-0.643475	1.60024e-12	7.56273e-16	3.95485e-15	4.07765e-11	-1	-1	-1	-1	-1
BAHD1	-0.508418	-0.455122	-0.467131	-0.574343	5.36998e-07	5.68362e-06	6.78451e-06	1.25498e-08	-1	0	0	-1	0
BAIAP2	-0.166263	-0.376064	-0.285564	-0.456629	0.143943	0.000253514	0.00923876	1.62071e-05	0	0	0	0	0
BAIAP2-AS1	-0.0849799	0.0443461	0.0983481	-0.359443	0.475811	0.705107	0.402425	0.00104672	0	0	0	0	0
BAIAP3	-0.0942493	-0.103125	0.0643693	-0.32277	0.425735	0.359354	0.591583	0.00368383	0	0	0	0	0
BAK1	-0.16238	-0.136125	-0.167512	-0.0959752	0.154185	0.2193	0.141744	0.440605	0	0	0	0	0
BAMBI	-0.298771	-0.429828	-0.413809	0.224559	0.00595292	2.13568e-05	8.86145e-05	0.0518802	0	0	0	0	0
BANF1	0.188538	0.357656	0.408852	0.297247	0.0945753	0.000537685	0.000110515	0.00806367	0	0	0	0	0
BANF1P3	-0.228251	-0.079771	0.06098	-0.0456019	0.0398901	0.484164	0.612145	0.727841	0	0	0	0	0
BANP	-0.598625	-0.592869	-0.580401	-0.422664	8.69514e-10	4.53372e-10	5.16819e-09	8.11152e-05	-1	-1	-1	0	0
BAP1	-0.161833	-0.171694	-0.110623	-0.348238	0.155716	0.116396	0.343771	0.00156581	0	0	0	0	0
BARD1	-0.119155	0.098838	-0.383676	-0.107572	0.306387	0.380776	0.000317859	0.382806	0	0	0	0	0
BASP1	0.636922	0.761357	0.754402	0.0672303	3.00209e-11	0	0	0.599546	1	1	1	0	0
BATF3	0.0431065	0.12369	0.270352	0.0721157	0.726049	0.266832	0.0141527	0.571253	0	0	0	0	0
BAX	0.0459132	-0.0735324	-0.25651	0.130555	0.707722	0.520303	0.0204337	0.281435	0	0	0	0	0
BAZ1A	-0.402265	-0.502106	-0.615394	-0.0497014	0.000131315	3.61622e-07	3.05582e-10	0.703156	0	-1	-1	0	0
BAZ1B	0.0358382	0.151992	0.142257	0.0127232	0.77268	0.167717	0.216458	0.927632	0	0	0	0	0
BAZ2A	-0.614012	-0.618256	-0.687335	-0.408381	2.37087e-10	4.74306e-11	2.5875e-13	0.000152376	-1	-1	-1	0	0
BAZ2B	-0.326832	-0.51915	-0.549826	-0.0227159	0.0024025	1.19089e-07	4.67121e-08	0.867503	0	-1	-1	0	0
BBIP1	0.332926	0.221107	0.287723	0.414266	0.00195282	0.0397571	0.00868044	0.000117874	0	0	0	0	0
BBOX1	0.371001	-0.254918	-0.164703	0.235171	0.000477028	0.016595	0.148947	0.040842	0	0	0	0	0
BBOX1-AS1	-0.503127	-0.518889	-0.573017	-0.499336	7.39753e-07	1.21095e-07	8.97864e-09	1.6482e-06	-1	-1	-1	0	0
BBS1	-0.172889	-0.0546762	-0.000141931	-0.237085	0.127577	0.636927	0.998987	0.0390669	0	0	0	0	0
BBS10	0.508569	0.362044	0.530814	0.678331	5.3211e-07	0.000451189	1.65146e-07	1.25627e-12	1	0	1	1	0
BBS12	0.683634	0.65693	0.715391	0.125727	2.51172e-13	9.95199e-13	8.90096e-15	0.301271	1	1	1	0	0
BBS2	0.457562	0.199781	0.142074	0.516052	9.44304e-06	0.0648396	0.217113	6.1142e-07	0	0	0	1	0
BBS4	0.735364	0.529011	0.540928	0.48501	0	6.10706e-08	8.5306e-08	3.68501e-06	1	1	1	0	0
BBS5	-0.547275	-0.579913	-0.662779	-0.597735	4.27005e-08	1.33811e-09	3.61349e-12	2.09985e-09	-1	-1	-1	-1	-1
BBS7	0.810365	0.873106	0.8786	0.607584	0	0	0	9.51226e-10	1	1	1	1	1
BBS9	-0.197438	-0.31837	-0.362043	-0.0603639	0.0788798	0.00231847	0.000737501	0.639914	0	0	0	0	0
BBX	0.214223	-0.184734	-0.153535	0.305106	0.0549838	0.0895138	0.180372	0.00638846	0	0	0	0	0
BCAM	-0.730806	-0.777155	-0.795555	-0.765156	0	0	0	0	-1	-1	-1	-1	-1
BCAN	-0.559711	-0.700261	-0.751095	-0.449613	1.76699e-08	6.17437e-15	0	2.29806e-05	-1	-1	-1	0	0
BCAP29	0.788991	0.829716	0.873933	0.617741	0	0	0	4.04568e-10	1	1	1	1	1
BCAP31	0.733367	0.847493	0.832059	0.430038	0	0	0	5.80708e-05	1	1	1	0	0
BCAR1	-0.388984	-0.432704	-0.492998	-0.213527	0.00023055	1.84808e-05	1.64616e-06	0.065868	0	0	0	0	0
BCAR3	-0.526278	-0.697211	-0.647099	-0.506288	1.73966e-07	9.39328e-15	1.71436e-11	1.09615e-06	-1	-1	-1	-1	-1
BCAS1	-0.328969	-0.350128	-0.441424	-0.164598	0.00223337	0.000722585	2.46936e-05	0.165604	0	0	0	0	0
BCAS2	0.785784	0.858952	0.870027	0.725041	0	0	0	5.46724e-15	1	1	1	1	1
BCAS2P1	-0.559265	-0.537418	-0.633831	-0.578321	1.82351e-08	3.39317e-08	5.96339e-11	9.35342e-09	-1	-1	-1	-1	-1
BCAS3	0.650185	0.793279	0.8129	0.706961	8.34023e-12	0	0	5.0342e-14	1	1	1	1	1
BCAS4	0.309143	0.530049	0.504231	-0.108488	0.00430454	5.68613e-08	8.58261e-07	0.378665	0	1	1	0	0
BCAT1	0.701744	0.858137	0.888405	0.630777	3.16134e-14	0	0	1.28367e-10	1	1	1	1	1
BCAT2	-0.410991	-0.631653	-0.614793	-0.375866	8.95434e-05	1.32061e-11	3.21484e-10	0.000566949	0	-1	-1	0	0
BCCIP	0.419023	0.372522	0.404527	0.514342	6.22651e-05	0.000294396	0.00013332	6.788e-07	0	0	0	1	0
BCDIN3D	0.187237	0.0725429	0.15274	0.271333	0.0970317	0.526106	0.182842	0.01661	0	0	0	0	0
BCDIN3D-AS1	-0.222426	0.178816	0.219174	-0.0941611	0.0457241	0.10108	0.050289	0.449923	0	0	0	0	0
BCHE	0.168943	-0.0762351	-0.226576	0.196261	0.137111	0.504166	0.0424961	0.0933934	0	0	0	0	0
BCKDHA	0.46488	0.387658	0.358612	0.470567	6.42563e-06	0.000154062	0.000838777	7.98166e-06	0	0	0	0	0
BCKDHB	0.514925	-0.0102021	0.0464786	0.388143	3.58924e-07	0.932559	0.701137	0.000350309	1	0	0	0	0
BCKDK	-0.0677867	-0.0112488	-0.108031	-0.257327	0.574085	0.925555	0.355687	0.0238736	0	0	0	0	0
BCL10	0.0376966	-0.195672	-0.220409	0.127741	0.760799	0.0709202	0.048919	0.292797	0	0	0	0	0
BCL11A	0.228175	0.338322	0.368567	-0.109966	0.0399613	0.00112961	0.000576022	0.371524	0	0	0	0	0
BCL11B	0.40909	0.445933	0.485813	-0.0477071	9.74135e-05	9.31275e-06	2.47105e-06	0.715047	0	0	0	0	0
BCL2	-0.421583	-0.650886	-0.658589	-0.171369	5.54283e-05	1.89192e-12	5.53384e-12	0.147322	0	-1	-1	0	0
BCL2A1	0.119971	0.0916153	0.0295022	0.180053	0.302914	0.417926	0.811402	0.126412	0	0	0	0	0
BCL2L1	-0.0733071	0.126965	-0.0355423	0.176599	0.542109	0.253877	0.771819	0.134447	0	0	0	0	0
BCL2L11	-0.582473	-0.509059	-0.580509	-0.0498237	3.18892e-09	2.31628e-07	5.12755e-09	0.702371	-1	-1	-1	0	0
BCL2L13	0.49514	0.446655	0.489404	0.215727	1.18399e-06	8.96309e-06	2.02144e-06	0.0628949	0	0	0	0	0
BCL2L2	0.0975807	0.681027	0.69048	-0.259261	0.408357	6.61243e-14	1.81628e-13	0.0227416	0	1	1	0	0
BCL2L2-PABPN1	0.399232	0.735358	0.692708	0.556825	0.000149369	0	1.41547e-13	4.38632e-08	0	1	1	1	0
BCL6	-0.24931	-0.451534	-0.531841	-0.0632896	0.0238328	6.91101e-06	1.54616e-07	0.621716	0	0	-1	0	0
BCL7A	0.464344	0.573302	0.551846	0.00735668	6.60829e-06	2.28755e-09	4.06151e-08	0.958611	0	1	1	0	0
BCL7B	0.160196	0.4003	0.451415	-0.0662954	0.160287	8.75729e-05	1.51263e-05	0.605107	0	0	0	0	0
BCL7C	-0.343457	-0.517565	-0.513848	-0.323744	0.00134443	1.322e-07	4.81199e-07	0.00356851	0	-1	-1	0	0
BCL9	-0.367491	-0.517626	-0.520129	-0.440406	0.000546813	1.31663e-07	3.25922e-07	3.57428e-05	0	-1	-1	0	0
BCL9L	-0.828594	-0.82383	-0.852127	-0.852195	0	0	0	0	-1	-1	-1	-1	-1
BCLAF1	0.796517	0.794126	0.800833	0.75292	0	0	0	0	1	1	1	1	1
BCO1	-0.285576	-0.418515	-0.355692	-0.337256	0.00887885	3.72319e-05	0.00093357	0.00228648	0	0	0	0	0
BCO2	-0.214692	0.198069	0.136728	0.0113068	0.0543962	0.067332	0.236026	0.935899	0	0	0	0	0
BCOR	-0.43039	-0.311136	-0.313181	0.135494	3.6678e-05	0.00296928	0.00400762	0.261669	0	0	0	0	0
BCORL1	-0.650484	-0.607784	-0.688181	-0.656025	8.1099e-12	1.23117e-10	2.35525e-13	1.2355e-11	-1	-1	-1	-1	-1
BCR	-0.539927	-0.723335	-0.745617	-0.637038	7.053e-08	0	0	7.34969e-11	-1	-1	-1	-1	-1
BCS1L	0.53375	0.497086	0.52204	0.516125	1.06604e-07	4.95326e-07	2.88858e-07	6.08674e-07	1	0	1	1	0
BCYRN1	-0.348719	-0.250665	-0.336505	-0.381662	0.00111045	0.0186274	0.00185131	0.000453095	0	0	0	0	0
BCYRN1P1	-0.136923	-0.173729	-0.131615	-0.230973	0.23543	0.111828	0.254882	0.0449822	0	0	0	0	0
BCYRN1P3	-0.290925	-0.273671	-0.295596	-0.397674	0.00756927	0.0097207	0.00688861	0.000238404	0	0	0	0	0
BDH1	0.249148	0.336087	0.393408	-0.0648409	0.0239246	0.00122627	0.000213515	0.612766	0	0	0	0	0
BDH2	0.418841	0.0647931	-0.0226227	0.478187	6.27823e-05	0.573083	0.855386	5.32464e-06	0	0	0	0	0
BDNF	0.355833	0.550665	0.580369	0.385185	0.000854701	1.29981e-08	5.1797e-09	0.000394568	0	1	1	0	0
BDNF-AS	0.175854	0.076693	0.123859	0.328482	0.120699	0.501514	0.285477	0.00306091	0	0	0	0	0
BDP1	0.457204	0.433073	0.495703	-0.0189866	9.62107e-06	1.8131e-05	1.40965e-06	0.88978	0	0	0	0	0
BEAN1	-0.484784	-0.524508	-0.541807	-0.478812	2.15982e-06	8.3141e-08	8.04044e-08	5.15556e-06	0	-1	-1	0	0
BECN1	0.768517	0.816701	0.828801	0.666902	0	0	0	4.15922e-12	1	1	1	1	1
BECN1P2	-0.147015	-0.148448	-0.047613	0.0722763	0.200525	0.178431	0.694207	0.570304	0	0	0	0	0
BEGAIN	-0.45499	-0.399844	-0.366785	-0.428328	1.08005e-05	8.94376e-05	0.000616606	6.26834e-05	0	0	0	0	0
BEND3P3	-0.518348	-0.331665	-0.444465	-0.608573	2.89422e-07	0.00144279	2.12786e-05	8.77344e-10	-1	0	0	-1	0
BEND5	0.508012	0.631486	0.74134	0.222637	5.4977e-07	1.34164e-11	0	0.0541285	1	1	1	0	0
BEND6	0.670786	0.821954	0.865915	0.388973	1.01773e-12	0	0	0.000338944	1	1	1	0	0
BEND7	-0.667791	-0.761833	-0.741914	-0.681768	1.39021e-12	0	0	8.65815e-13	-1	-1	-1	-1	-1
BEND7P1	-0.385442	-0.415265	-0.439387	-0.343076	0.000266857	4.35676e-05	2.72439e-05	0.00187459	0	0	0	0	0
BEST1	0.293117	0.100192	0.0640265	0.349971	0.00708516	0.373918	0.593652	0.00147157	0	0	0	0	0
BEST3	-0.48013	-0.447904	-0.410862	-0.151237	2.80654e-06	8.38419e-06	0.000101127	0.206234	0	0	0	0	0
BET1	0.238697	0.389274	0.426418	0.468053	0.0310726	0.0001436	5.01904e-05	9.10784e-06	0	0	0	0	0
BET1L	-0.501086	-0.543302	-0.533253	-0.224634	8.34046e-07	2.21953e-08	1.41178e-07	0.0517971	-1	-1	-1	0	0
BEX1	0.857989	0.917641	0.931383	0.519614	0	0	0	4.92308e-07	1	1	1	1	1
BEX2	0.887854	0.910862	0.934691	0.667494	0	0	0	3.91118e-12	1	1	1	1	1
BEX4	0.854538	0.907035	0.924747	0.786774	0	0	0	0	1	1	1	1	1
BEX5	0.836147	0.890051	0.917637	0.412087	0	0	0	0.000129708	1	1	1	0	0
BFAR	0.355627	0.393789	0.454948	0.507266	0.000860899	0.000117563	1.26785e-05	1.03426e-06	0	0	0	1	0
BGN	-0.637254	-0.651131	-0.694131	-0.388386	2.91353e-11	1.84435e-12	1.20081e-13	0.000346964	-1	-1	-1	0	0
BHLHB9	0.601984	0.74369	0.815534	0.312768	6.60469e-10	0	0	0.00504511	1	1	1	0	0
BHLHE22	0.562436	0.695197	0.66009	0.174188	1.44817e-08	1.19568e-14	4.75703e-12	0.14025	1	1	1	0	0
BHLHE40	0.300585	0.484302	0.40446	0.117036	0.00563042	1.08159e-06	0.000133687	0.339147	0	0	0	0	0
BHLHE40-AS1	-0.560179	-0.391328	-0.40692	-0.360835	1.70712e-08	0.000131195	0.000120196	0.000994512	-1	0	0	0	0
BHLHE41	-0.116887	-0.170205	-0.173909	0.333649	0.316173	0.119896	0.126325	0.00257817	0	0	0	0	0
BHMT2	-0.580256	-0.695781	-0.684967	-0.605033	3.78884e-09	1.06882e-14	3.37861e-13	1.1708e-09	-1	-1	-1	-1	-1
BICC1	0.11016	0.22659	0.186905	-0.0994574	0.346105	0.0348074	0.0986222	0.423301	0	0	0	0	0
BICD1	0.161614	0.223818	0.315979	-0.16027	0.156296	0.0372523	0.00366967	0.177918	0	0	0	0	0
BICD2	0.0589198	0.108889	0.108015	0.178497	0.627256	0.331486	0.355712	0.12998	0	0	0	0	0
BID	0.617822	0.467572	0.504585	0.113298	1.69641e-10	2.85282e-06	8.40499e-07	0.355852	1	0	1	0	0
BIN1	0.079903	-0.0141307	0.0140323	0.279566	0.504495	0.90604	0.909973	0.0133207	0	0	0	0	0
BIN2	0.0598989	-0.208323	-0.322527	0.164915	0.62127	0.0535949	0.00296352	0.164683	0	0	0	0	0
BIN3	-0.559337	-0.446565	-0.332777	-0.371812	1.81504e-08	9.00389e-06	0.00210269	0.000662139	-1	0	0	0	0
BIRC2	0.406251	0.391954	0.476291	0.517449	0.000110375	0.000127545	4.16128e-06	5.61798e-07	0	0	0	1	0
BIRC3	0.489106	0.127154	0.109314	0.288792	1.68168e-06	0.253166	0.349734	0.0102965	0	0	0	0	0
BIRC6	0.775216	0.682152	0.659995	0.596433	0	5.78847e-14	4.80174e-12	2.33267e-09	1	1	1	1	1
BIRC6-AS2	0.14505	0.0398772	0.115036	0.0849007	0.207069	0.734174	0.32372	0.499564	0	0	0	0	0
BISPR	-0.496061	-0.617928	-0.760408	-0.433819	1.12166e-06	4.89196e-11	0	4.88125e-05	0	-1	-1	0	0
BIVM	0.424283	0.658561	0.63278	0.342923	4.88257e-05	8.34639e-13	6.56108e-11	0.00188357	0	1	1	0	0
BIVM-ERCC5	0.247186	0.113879	0.263092	-0.0903016	0.0251464	0.308519	0.0172002	0.470641	0	0	0	0	0
BLCAP	0.644563	0.734413	0.768972	0.089541	1.4511e-11	0	0	0.474728	1	1	1	0	0
BLID	-0.347389	-0.211389	-0.397736	0.224898	0.00116569	0.0499837	0.000178286	0.0515025	0	0	0	0	0
BLM	-0.493457	-0.116782	-0.372141	-0.365444	1.30691e-06	0.295853	0.000502223	0.000839624	0	0	0	0	0
BLMH	0.686019	0.753841	0.7331	0.687636	1.92929e-13	0	1.37341e-15	4.56949e-13	1	1	1	1	1
BLNK	-0.016085	-0.296422	-0.189862	0.0499522	0.899172	0.0048242	0.0931164	0.701717	0	0	0	0	0
BLOC1S1	0.812633	0.728732	0.76849	0.690561	0	0	0	3.33156e-13	1	1	1	1	1
BLOC1S1-RDH5	0.0806109	0.0906343	-0.009656	0.117826	0.500585	0.423348	0.938058	0.335666	0	0	0	0	0
BLOC1S2	0.759327	0.846964	0.881654	0.658375	0	0	0	9.81963e-12	1	1	1	1	1
BLOC1S3	-0.574972	-0.471519	-0.449725	-0.403662	5.6798e-09	2.27822e-06	1.64395e-05	0.000186026	-1	0	0	0	0
BLOC1S4	0.181848	0.251436	0.163108	0.12235	0.107691	0.0182393	0.15307	0.31582	0	0	0	0	0
BLOC1S5	-0.231519	-0.160786	-0.0438952	-0.0576362	0.0369576	0.143107	0.71768	0.656231	0	0	0	0	0
BLOC1S5-TXNDC5	0.207361	0.0445283	0.164146	-0.0758298	0.0640199	0.704005	0.150381	0.550135	0	0	0	0	0
BLOC1S6	0.711215	0.746933	0.791887	0.529039	9.19745e-15	0	0	2.73595e-07	1	1	1	1	1
BLVRA	0.674017	0.786356	0.824041	0.340086	7.19092e-13	0	0	0.00207869	1	1	1	0	0
BLVRB	0.361994	0.451678	0.451597	0.312883	0.000676882	6.85836e-06	1.49923e-05	0.00502649	0	0	0	0	0
BLZF1	0.587274	0.504163	0.586997	0.443017	2.18653e-09	3.16796e-07	3.11243e-09	3.16565e-05	1	1	1	0	0
BLZF2P	-0.714404	-0.678424	-0.745374	-0.598263	7.02289e-15	8.97092e-14	0	2.01508e-09	-1	-1	-1	-1	-1
BMI1	0.0803641	0.0796201	0.127119	0.183244	0.501977	0.485022	0.272348	0.119206	0	0	0	0	0
BMP1	-0.576906	-0.660125	-0.746682	-0.4152	4.90289e-09	7.04712e-13	0	0.000113284	-1	-1	-1	0	0
BMP2	0.211782	0.00327152	-0.0380727	0.096641	0.0580904	0.979078	0.755353	0.437439	0	0	0	0	0
BMP2K	0.131394	-0.324053	-0.377326	0.160281	0.256078	0.00189868	0.000410031	0.177907	0	0	0	0	0
BMP2KL	0.276934	0.415253	0.327366	-0.0363602	0.0114042	4.35904e-05	0.00252422	0.784177	0	0	0	0	0
BMP4	-0.433232	0.283126	0.325086	0.114903	3.20342e-05	0.00732297	0.0027236	0.348747	0	0	0	0	0
BMP6	-0.327363	-0.405484	-0.500569	-0.32142	0.0023607	6.8985e-05	1.06348e-06	0.00384367	0	0	-1	0	0
BMP7	-0.358448	-0.811671	-0.820006	-0.441356	0.000774875	0	0	3.42164e-05	0	-1	-1	0	0
BMP8A	-0.649036	-0.6667	-0.754992	-0.16572	9.32574e-12	3.42115e-13	0	0.162492	-1	-1	-1	0	0
BMP8B	-0.32914	-0.519561	-0.611194	-0.00951799	0.00222029	1.15944e-07	4.36022e-10	0.946104	0	-1	-1	0	0
BMPER	0.39181	0.74333	0.742481	0.101749	0.000204777	0	0	0.411467	0	1	1	0	0
BMPR1A	0.213864	-0.221145	-0.357874	0.0547289	0.0554135	0.0397205	0.000861711	0.673194	0	0	0	0	0
BMPR1B	-0.122461	-0.579277	-0.54111	-0.340036	0.291979	1.40984e-09	8.42639e-08	0.0020824	0	-1	-1	0	0
BMPR2	0.633569	0.743087	0.732714	0.0757503	4.11992e-11	0	1.37341e-15	0.550516	1	1	1	0	0
BMS1	0.381106	0.580453	0.673226	0.251572	0.000317833	1.28087e-09	1.22012e-12	0.0275921	0	1	1	0	0
BMS1P10	-0.342445	-0.00172951	-0.175419	-0.22673	0.00139503	0.989242	0.122854	0.0494351	0	0	0	0	0
BMS1P17	-0.213337	-0.0435489	0.0433782	-0.0763409	0.0560877	0.710026	0.72078	0.547099	0	0	0	0	0
BMS1P18	-0.213337	-0.0435489	0.0433782	-0.0763409	0.0560877	0.710026	0.72078	0.547099	0	0	0	0	0
BMS1P20	0.373453	0.488462	0.508079	0.166541	0.000433323	8.4281e-07	6.82864e-07	0.160335	0	0	1	0	0
BMS1P4	-0.49871	-0.506381	-0.35729	-0.0452984	9.61035e-07	2.75283e-07	0.000880639	0.729603	0	-1	0	0	0
BMS1P5	-0.344222	-0.322767	-0.313151	-0.212227	0.00130827	0.00198737	0.00401129	0.0676765	0	0	0	0	0
BMS1P6	0.0242659	0.0587162	0.178225	0.214314	0.846712	0.611504	0.11656	0.0648012	0	0	0	0	0
BMS1P7	0.182689	0.397445	0.415561	0.394589	0.105966	9.96323e-05	8.20322e-05	0.000270291	0	0	0	0	0
BMS1P9	0.193366	0.374606	0.520597	0.169987	0.0857336	0.000269633	3.16466e-07	0.150979	0	0	1	0	0
BNC2	0.107895	-0.524688	-0.521284	-0.034097	0.356821	8.2129e-08	3.02963e-07	0.798129	0	-1	-1	0	0
BNIP1	0.651536	0.730904	0.707999	0.7154	7.29573e-12	0	2.3061e-14	1.75407e-14	1	1	1	1	1
BNIP2	-0.298696	-0.590541	-0.543194	-0.0961848	0.00596709	5.5413e-10	7.32352e-08	0.439596	0	-1	-1	0	0
BNIP3	0.548856	0.605676	0.719862	0.548702	3.82601e-08	1.48745e-10	5.21357e-15	7.5793e-08	1	1	1	1	1
BNIP3L	0.690258	0.704681	0.724529	0.623576	1.18557e-13	3.52187e-15	2.67958e-15	2.45228e-10	1	1	1	1	1
BNIP3P10	0.0193702	-0.237711	-0.0496787	-0.0695885	0.878115	0.0262899	0.681203	0.586045	0	0	0	0	0
BNIP3P25	-0.147261	-0.125026	-0.184742	0.116798	0.199685	0.261554	0.10291	0.340158	0	0	0	0	0
BNIP3P40	-0.116939	-0.183932	-0.270459	0.160089	0.315959	0.0909913	0.0141129	0.178441	0	0	0	0	0
BNIP3P5	-0.151776	-0.202059	-0.207605	-0.135013	0.185256	0.061703	0.0647634	0.263526	0	0	0	0	0
BNIPL	-0.53768	-0.541768	-0.620323	-0.346335	8.21904e-08	2.48374e-08	1.99852e-10	0.00167197	-1	-1	-1	0	0
BOC	-0.519726	-0.73195	-0.752654	-0.579835	2.65439e-07	0	0	8.3349e-09	-1	-1	-1	-1	-1
BOD1	0.607583	0.605434	0.693683	0.631318	4.12291e-10	1.51972e-10	1.26545e-13	1.22976e-10	1	1	1	1	1
BOD1L1	0.357302	0.464137	0.418739	0.172872	0.000808722	3.46289e-06	7.11536e-05	0.14347	0	0	0	0	0
BOK	-0.353722	-0.404881	-0.415997	-0.0263741	0.000924216	7.09456e-05	8.04449e-05	0.845609	0	0	0	0	0
BOLA1	0.439739	0.440331	0.393666	0.30515	2.33247e-05	1.25069e-05	0.000211321	0.00637978	0	0	0	0	0
BOLA2	0.560652	0.469193	0.461582	0.330998	1.64955e-08	2.60135e-06	9.05549e-06	0.00281492	1	0	0	0	0
BOLA2B	0.389711	0.263831	0.33748	0.213237	0.000223758	0.0129271	0.00178992	0.0662452	0	0	0	0	0
BOLA3	0.725451	0.812625	0.803818	0.606113	1.31544e-15	0	0	1.07226e-09	1	1	1	1	1
BOLA3-AS1	0.060033	0.27226	0.254824	0.0350014	0.620528	0.010127	0.0213469	0.792705	0	0	0	0	0
BOP1	-0.0207922	-0.0691827	-0.019182	-0.274447	0.869134	0.546187	0.877312	0.0152848	0	0	0	0	0
BPGM	0.764715	0.70823	0.760225	0.77592	0	2.1558e-15	0	0	1	1	1	1	1
BPHL	0.552108	0.494858	0.518279	0.3768	3.05785e-08	5.69196e-07	3.65736e-07	0.000546846	1	0	1	0	0
BPIFB5P	-0.725319	-0.755269	-0.761048	-0.725649	1.31544e-15	0	0	5.46724e-15	-1	-1	-1	-1	-1
BPIFB9P	-0.753281	-0.75148	-0.759288	-0.691591	0	0	0	2.95366e-13	-1	-1	-1	-1	-1
BPNT1	0.65801	0.622703	0.615863	0.694886	3.82596e-12	3.11842e-11	2.93765e-10	2.03912e-13	1	1	1	1	1
BPTF	-0.452461	-0.550991	-0.614961	-0.213383	1.2313e-05	1.2693e-08	3.16983e-10	0.0660549	0	-1	-1	0	0
BRAF	0.700207	0.768522	0.708389	0.0350757	3.72377e-14	0	2.1922e-14	0.792432	1	1	1	0	0
BRAP	0.546567	0.576256	0.617197	0.677767	4.48427e-08	1.80219e-09	2.61872e-10	1.33327e-12	1	1	1	1	1
BRAT1	-0.351972	-0.370832	-0.442721	-0.464283	0.000985892	0.000315835	2.31827e-05	1.10497e-05	0	0	0	0	0
BRCA1	-0.358667	-0.476834	-0.397954	0.077721	0.000768388	1.67942e-06	0.000176639	0.539651	0	0	0	0	0
BRCA1P1	-0.550896	-0.608789	-0.58197	-0.429729	3.31954e-08	1.1267e-10	4.58527e-09	5.88734e-05	-1	-1	-1	0	0
BRCC3	0.713565	0.722973	0.750015	0.314318	7.02289e-15	0	0	0.00481874	1	1	1	0	0
BRCC3P1	-0.609767	-0.535956	-0.565271	-0.498488	3.42615e-10	3.76258e-08	1.57923e-08	1.73197e-06	-1	-1	-1	0	0
BRD1	-0.392791	-0.462277	-0.445988	-0.501825	0.000196574	3.8412e-06	1.97603e-05	1.42565e-06	0	0	0	-1	0
BRD2	0.211291	0.293268	0.121582	0.214819	0.0587369	0.00533989	0.295027	0.0640876	0	0	0	0	0
BRD3	-0.531984	-0.582373	-0.670317	-0.566447	1.19607e-07	1.09343e-09	1.65656e-12	2.21913e-08	-1	-1	-1	-1	-1
BRD4	-0.799563	-0.796398	-0.82434	-0.799389	0	0	0	0	-1	-1	-1	-1	-1
BRD7	0.294537	0.0559013	0.0360072	0.264647	0.00678922	0.629305	0.76866	0.019832	0	0	0	0	0
BRD7P3	-0.512906	-0.569256	-0.586462	-0.304342	4.06819e-07	3.14939e-09	3.24349e-09	0.00653775	-1	-1	-1	0	0
BRD7P4	-0.402802	-0.505171	-0.498756	-0.366051	0.000128275	2.97246e-07	1.18183e-06	0.000821449	0	-1	0	0	0
BRD8	0.465728	0.543798	0.57518	0.33875	6.14615e-06	2.14103e-08	7.65537e-09	0.00217374	0	1	1	0	0
BRD9	-0.316769	-0.185698	-0.0560999	-0.299923	0.00336163	0.08775	0.641763	0.00744422	0	0	0	0	0
BRE	0.758514	0.750912	0.797999	0.46879	0	0	0	8.75806e-06	1	1	1	0	0
BRF1	-0.319361	-0.252477	-0.329354	-0.351152	0.00308816	0.0177316	0.00236239	0.00141186	0	0	0	0	0
BRF2	0.692803	0.648596	0.711473	0.54907	8.85156e-14	2.40442e-12	1.48821e-14	7.39893e-08	1	1	1	1	1
BRI3	-0.187671	-0.253783	-0.185381	0.0866099	0.096192	0.0171193	0.101649	0.490391	0	0	0	0	0
BRI3BP	0.175397	0.147885	0.333971	-0.0643174	0.121731	0.180142	0.00201889	0.615658	0	0	0	0	0
BRICD5	-0.442353	-0.4486	-0.537526	-0.479441	2.04906e-05	8.08862e-06	1.06965e-07	4.98465e-06	0	0	-1	0	0
BRINP1	0.694421	0.730233	0.70034	-0.0105275	7.44639e-14	0	5.81258e-14	0.940343	1	1	1	0	0
BRINP2	0.430872	0.612863	0.580386	-0.0681038	3.58427e-05	7.78672e-11	5.17348e-09	0.594545	0	1	1	0	0
BRINP3	0.082946	0.312297	-0.0333227	-0.184567	0.487639	0.00285542	0.786185	0.116337	0	0	0	0	0
BRIP1	-0.568801	-0.566577	-0.565539	-0.582032	9.06241e-09	3.89245e-09	1.54997e-08	7.08474e-09	-1	-1	-1	-1	-1
BRIX1	0.747722	0.789206	0.826958	0.732499	0	0	0	0	1	1	1	1	1
BRK1	0.699581	0.737507	0.764066	0.509268	4.10372e-14	0	0	9.18611e-07	1	1	1	1	1
BRMS1	0.178693	0.0216956	-0.0678673	0.208093	0.114424	0.85507	0.570777	0.073781	0	0	0	0	0
BRMS1L	0.701135	0.759904	0.748334	0.455986	3.3506e-14	0	0	1.67279e-05	1	1	1	0	0
BROX	0.256435	-0.0203666	0.0249682	0.406016	0.0198419	0.863921	0.840007	0.000168458	0	0	0	0	0
BRPF1	-0.0310431	-0.198429	-0.199051	-0.100237	0.802858	0.0668059	0.0773943	0.419241	0	0	0	0	0
BRPF3	-0.463628	-0.322807	-0.307653	-0.44066	6.85614e-06	0.00198459	0.00476988	3.53207e-05	0	0	0	0	0
BRSK1	-0.185189	0.10499	0.0751152	-0.248783	0.100966	0.350143	0.528859	0.0295526	0	0	0	0	0
BRSK2	-0.159824	-0.0395296	-0.0234012	-0.331126	0.161275	0.736584	0.850546	0.00280291	0	0	0	0	0
BRWD1	0.770344	0.804961	0.855175	0.657926	0	0	0	1.02607e-11	1	1	1	1	1
BRWD3	0.0389518	0.125133	-0.220103	-0.151564	0.752836	0.261143	0.0492518	0.205182	0	0	0	0	0
BSCL2	0.797006	0.891273	0.868543	0.293572	0	0	0	0.00896448	1	1	1	0	0
BSDC1	0.469521	0.227129	0.304089	0.427532	5.01598e-06	0.0343481	0.00533409	6.49988e-05	0	0	0	0	0
BSG	-0.206792	-0.369261	-0.346464	-0.438091	0.0647759	0.000337358	0.00130541	3.98975e-05	0	0	0	0	0
BSN	-0.542712	-0.521338	-0.536268	-0.370695	5.83031e-08	1.03064e-07	1.1619e-07	0.000690855	-1	-1	-1	0	0
BSN-AS2	-0.634485	-0.500414	-0.636146	-0.57692	3.77579e-11	4.01806e-07	4.8128e-11	1.03945e-08	-1	-1	-1	-1	-1
BST2	-0.309308	-0.512663	-0.493146	-0.211718	0.00428227	1.8295e-07	1.63329e-06	0.0684035	0	-1	0	0	0
BTAF1	0.616425	0.568942	0.599423	0.593682	1.91886e-10	3.2269e-09	1.15902e-09	2.90188e-09	1	1	1	1	1
BTBD1	0.754726	0.708314	0.722878	0.687303	0	2.1558e-15	3.95485e-15	4.71502e-13	1	1	1	1	1
BTBD10	0.752698	0.850147	0.87321	0.383339	0	0	0	0.000424019	1	1	1	0	0
BTBD10P2	-0.0380882	-0.0291105	-0.108821	0.424625	0.758417	0.805179	0.351979	7.41938e-05	0	0	0	0	0
BTBD11	0.654015	0.810118	0.77978	0.20278	5.70659e-12	0	0	0.0820858	1	1	1	0	0
BTBD16	0.303151	0.31966	0.221458	0.450646	0.0052013	0.0022177	0.0477589	2.18365e-05	0	0	0	0	0
BTBD18	-0.649227	-0.703609	-0.7304	-0.635689	9.15953e-12	4.16713e-15	1.37341e-15	8.30262e-11	-1	-1	-1	-1	-1
BTBD2	-0.521371	-0.575984	-0.620308	-0.623833	2.38962e-07	1.84241e-09	2.00077e-10	2.40216e-10	-1	-1	-1	-1	-1
BTBD3	0.698913	0.81639	0.893516	0.794822	4.3904e-14	0	0	0	1	1	1	1	1
BTBD6	-0.0734487	0.0578883	0.0772298	-0.270317	0.541284	0.616571	0.516801	0.0170722	0	0	0	0	0
BTBD7	-0.480349	-0.247313	-0.175354	-0.349434	2.7737e-06	0.020407	0.122988	0.00150018	0	0	0	0	0
BTBD7P1	-0.495567	-0.462731	-0.533994	-0.506156	1.15489e-06	3.74495e-06	1.34662e-07	1.10432e-06	0	0	-1	-1	0
BTBD8	-0.0777742	-0.194974	-0.170976	0.155195	0.516519	0.0720248	0.13322	0.193386	0	0	0	0	0
BTBD9	-0.0174207	0.186819	0.247516	-0.153034	0.890615	0.0857572	0.0256728	0.200208	0	0	0	0	0
BTD	0.549714	0.564915	0.546604	0.594448	3.60496e-08	4.42972e-09	5.81594e-08	2.73824e-09	1	1	1	1	1
BTF3	0.713325	0.762873	0.758587	0.688178	7.02289e-15	0	0	4.33125e-13	1	1	1	1	1
BTF3L4	0.787182	0.865956	0.850627	0.800191	0	0	0	0	1	1	1	1	1
BTF3L4P2	-0.0301567	-0.338667	-0.317376	0.142592	0.808752	0.0011155	0.00350849	0.235502	0	0	0	0	0
BTF3P12	-0.376033	-0.206783	-0.15983	-0.0438884	0.000390618	0.0555075	0.162032	0.737347	0	0	0	0	0
BTF3P16	-0.337708	-0.347206	-0.297026	-0.0219274	0.00165031	0.000807882	0.00660288	0.872253	0	0	0	0	0
BTF3P3	-0.219487	-0.2907	-0.418661	-0.214989	0.0488581	0.00579163	7.13971e-05	0.0638771	0	0	0	0	0
BTG1	-0.000197679	-0.279728	-0.283212	-0.133226	0.998699	0.00811722	0.00988424	0.270535	0	0	0	0	0
BTG2	0.0847631	-0.171693	-0.249701	0.0923463	0.477067	0.116396	0.0243074	0.459595	0	0	0	0	0
BTG3	0.586332	0.406873	0.411238	0.534329	2.35191e-09	6.46963e-05	9.94842e-05	1.95626e-07	1	0	0	1	0
BTK	0.222905	-0.0212822	-0.112358	0.236846	0.0452247	0.857751	0.335954	0.0392752	0	0	0	0	0
BTN2A1	0.492613	0.564358	0.529715	0.52545	1.37235e-06	4.62362e-09	1.77183e-07	3.42372e-07	0	1	1	1	0
BTN2A2	0.0311502	-0.303367	-0.290785	-0.212687	0.802327	0.00385185	0.00793792	0.0669864	0	0	0	0	0
BTN3A1	0.0866013	-0.258015	-0.13297	0.0400847	0.467009	0.0152371	0.249844	0.76093	0	0	0	0	0
BTN3A2	-0.20266	-0.389028	-0.416246	-0.180989	0.070804	0.000145158	7.95832e-05	0.124154	0	0	0	0	0
BTN3A3	0.446384	0.311209	0.292722	0.196594	1.678e-05	0.00296209	0.00749798	0.0928182	0	0	0	0	0
BTNL9	-0.22776	-0.750831	-0.726125	-0.683847	0.0403518	0	2.67958e-15	6.90937e-13	0	-1	-1	-1	0
BTRC	0.72859	0.787832	0.82754	0.211563	1.31544e-15	0	0	0.0686267	1	1	1	0	0
BUB3	0.736656	0.780849	0.802667	0.752063	0	0	0	0	1	1	1	1	1
BUD13	0.374412	0.527807	0.511977	0.559032	0.000416831	6.63477e-08	5.39019e-07	3.76312e-08	0	1	1	1	0
BUD31	0.666766	0.663607	0.71094	0.720698	1.54786e-12	4.80811e-13	1.60895e-14	1.04399e-14	1	1	1	1	1
BVES	-0.171088	-0.330651	-0.280007	0.291814	0.131869	0.00149615	0.0108206	0.00943752	0	0	0	0	0
BYSL	0.341818	0.307709	0.430833	0.303686	0.00142568	0.00333464	4.0877e-05	0.00666303	0	0	0	0	0
BZRAP1	-0.337069	-0.531331	-0.532347	-0.444377	0.00168857	5.20044e-08	1.49711e-07	2.96701e-05	0	-1	-1	0	0
BZW1	0.760157	0.716746	0.690141	0.758197	0	7.56273e-16	1.88993e-13	0	1	1	1	1	1
BZW1P2	-0.18493	-0.441826	-0.456033	-0.329003	0.101484	1.15639e-05	1.20144e-05	0.00300859	0	0	0	0	0
BZW2	0.801268	0.854141	0.878584	0.58779	0	0	0	4.59559e-09	1	1	1	1	1
C10orf10	-0.160443	-0.339121	-0.348011	-0.213096	0.159603	0.00109733	0.0012357	0.066434	0	0	0	0	0
C10orf105	-0.592638	-0.726178	-0.600365	-0.459139	1.42424e-09	0	1.07242e-09	1.43279e-05	-1	-1	-1	0	0
C10orf107	0.363416	0.550901	0.544719	0.408196	0.000641153	1.27677e-08	6.59715e-08	0.000153575	0	1	1	0	0
C10orf11	-0.0650111	-0.246947	-0.418895	-0.239925	0.590492	0.0206058	7.06522e-05	0.0365697	0	0	0	0	0
C10orf113	-0.545566	-0.565212	-0.502771	-0.585219	4.80246e-08	4.32896e-09	9.36356e-07	5.54347e-09	-1	-1	-1	-1	-1
C10orf12	-0.430405	-0.381778	-0.43037	-0.163502	3.66553e-05	0.000198747	4.18018e-05	0.168686	0	0	0	0	0
C10orf128	-0.166913	-0.149007	-0.0999467	0.266856	0.142237	0.176746	0.394452	0.018709	0	0	0	0	0
C10orf2	-0.327789	-0.222677	-0.248249	-0.278639	0.00232757	0.0383137	0.0252184	0.0136571	0	0	0	0	0
C10orf32	0.580214	0.530941	0.577461	0.424824	3.80114e-09	5.34189e-08	6.46554e-09	7.35347e-05	1	1	1	0	0
C10orf35	0.66209	0.759421	0.810582	0.160622	2.52369e-12	0	0	0.176924	1	1	1	0	0
C10orf54	-0.486147	-0.706115	-0.70256	-0.617796	1.99632e-06	2.83245e-15	4.481e-14	4.02915e-10	0	-1	-1	-1	0
C10orf76	0.247092	0.249617	0.134937	0.234213	0.0252076	0.0191736	0.242569	0.041758	0	0	0	0	0
C10orf88	0.75971	0.810099	0.856785	0.69581	0	0	0	1.84836e-13	1	1	1	1	1
C10orf90	-0.145426	-0.151445	-0.218624	0.223888	0.205797	0.169335	0.0508828	0.0526787	0	0	0	0	0
C11orf1	0.713023	0.600672	0.473848	0.476038	8.12213e-15	2.31108e-10	4.74707e-06	5.97496e-06	1	1	0	0	0
C11orf24	0.39641	0.31557	0.302494	0.376282	0.000168588	0.00255289	0.00559894	0.000557422	0	0	0	0	0
C11orf30	-0.357201	-0.322832	-0.401344	-0.0622711	0.000811935	0.00198295	0.000152894	0.628315	0	0	0	0	0
C11orf31	0.589171	0.62938	0.743253	0.400036	1.88147e-09	1.64786e-11	0	0.000216462	1	1	1	0	0
C11orf39	0.0229617	-0.271745	-0.188381	0.228879	0.855212	0.0102807	0.0958391	0.0471076	0	0	0	0	0
C11orf42	-0.297314	-0.328009	-0.234764	-0.356626	0.00623188	0.00164792	0.0350568	0.00116103	0	0	0	0	0
C11orf49	0.291189	0.087433	0.0669634	-0.282971	0.0075119	0.440596	0.576069	0.0121309	0	0	0	0	0
C11orf54	0.403995	0.37804	0.391486	0.538108	0.000121804	0.000233053	0.000231272	1.52628e-07	0	0	0	1	0
C11orf57	0.719426	0.814914	0.807417	0.776999	3.65993e-15	0	0	0	1	1	1	1	1
C11orf58	0.73646	0.743171	0.759161	0.72041	0	0	0	1.04399e-14	1	1	1	1	1
C11orf63	-0.205998	0.0873486	0.11139	-0.18342	0.0658945	0.441009	0.340261	0.11883	0	0	0	0	0
C11orf65	-0.135094	-0.271276	-0.263647	0.168568	0.242214	0.0104196	0.0169501	0.154774	0	0	0	0	0
C11orf68	0.403341	0.425334	0.265892	0.0530277	0.000125333	2.66995e-05	0.0159671	0.683755	0	0	0	0	0
C11orf70	-0.296902	-0.577148	-0.60108	-0.503617	0.00630866	1.67672e-09	1.01152e-09	1.28289e-06	0	-1	-1	-1	0
C11orf71	0.541861	0.487591	0.442267	0.51634	6.17963e-08	8.88424e-07	2.37134e-05	6.00574e-07	1	0	0	1	0
C11orf72	-0.171404	-0.127797	-0.286075	0.0480086	0.131128	0.250587	0.00910767	0.71327	0	0	0	0	0
C11orf73	0.687475	0.724259	0.749188	0.769013	1.63803e-13	0	0	0	1	1	1	1	1
C11orf74	0.735304	0.807623	0.803337	0.522388	0	0	0	4.15389e-07	1	1	1	1	1
C11orf80	0.343786	0.396864	0.370805	-0.206728	0.00132889	0.000102287	0.000528478	0.0758812	0	0	0	0	0
C11orf84	-0.470316	-0.344365	-0.36795	-0.416028	4.80587e-06	0.000900853	0.000589872	0.000109154	0	0	0	0	0
C11orf87	0.614895	0.671415	0.69353	0.00798644	2.19337e-10	2.00896e-13	1.28659e-13	0.95496	1	1	1	0	0
C11orf88	-0.116875	0.0370038	0.0367568	0.191272	0.316215	0.75294	0.763893	0.102818	0	0	0	0	0
C11orf95	-0.1795	-0.27451	-0.340487	-0.367178	0.112626	0.00948167	0.00161194	0.00078867	0	0	0	0	0
C11orf96	0.0843743	0.046957	-0.170178	-0.0387166	0.479412	0.687955	0.135116	0.769618	0	0	0	0	0
C11orf98	0.52494	0.479425	0.58847	0.446319	1.89921e-07	1.44304e-06	2.77509e-09	2.7036e-05	1	0	1	0	0
C12orf10	0.585508	0.767371	0.789017	0.344431	2.50883e-09	0	0	0.0017879	1	1	1	0	0
C12orf29	0.583201	0.547341	0.607605	0.568119	3.01118e-09	1.65629e-08	5.89438e-10	1.96877e-08	1	1	1	1	1
C12orf4	0.684284	0.813866	0.845749	0.481534	2.32547e-13	0	0	4.45061e-06	1	1	1	0	0
C12orf43	0.508055	0.65484	0.81418	0.0763431	5.48452e-07	1.24468e-12	0	0.547099	1	1	1	0	0
C12orf45	0.703092	0.610709	0.72552	0.366805	2.6647e-14	9.47261e-11	2.67958e-15	0.000798731	1	1	1	0	0
C12orf49	0.13334	0.42209	0.371613	0.103827	0.248773	3.13738e-05	0.000512482	0.401164	0	0	0	0	0
C12orf5	0.0188733	0.198389	0.230739	-0.0310706	0.881095	0.0668549	0.0385679	0.816628	0	0	0	0	0
C12orf50	0.0137361	0.127357	0.183128	0.154319	0.914723	0.252357	0.106156	0.196173	0	0	0	0	0
C12orf57	0.0817077	0.405485	0.3791	-0.0866698	0.494153	6.8985e-05	0.000382521	0.490082	0	0	0	0	0
C12orf60	0.401685	0.271105	0.268429	0.400806	0.00013451	0.0104695	0.0149148	0.000209634	0	0	0	0	0
C12orf65	-0.447237	-0.505673	-0.507536	-0.35413	1.60673e-05	2.87912e-07	7.05613e-07	0.00126834	0	-1	-1	0	0
C12orf66	0.535234	0.507087	0.420519	0.528997	9.64966e-08	2.63019e-07	6.5678e-05	2.74294e-07	1	1	0	1	0
C12orf73	0.433253	0.517843	0.507637	0.467617	3.20047e-05	1.29814e-07	7.01347e-07	9.31524e-06	0	1	1	0	0
C12orf75	0.417098	0.258147	0.138147	0.389094	6.79921e-05	0.0151825	0.230944	0.000337507	0	0	0	0	0
C12orf76	0.781864	0.805553	0.856576	0.710126	0	0	0	3.33587e-14	1	1	1	1	1
C14orf1	0.655165	0.561244	0.621421	0.602063	5.10622e-12	5.8718e-09	1.81578e-10	1.49104e-09	1	1	1	1	1
C14orf105	-0.426498	-0.304659	-0.448511	-0.103969	4.40248e-05	0.00368774	1.74582e-05	0.400467	0	0	0	0	0
C14orf119	0.59352	0.634777	0.691993	0.751958	1.32614e-09	9.71585e-12	1.5341e-13	0	1	1	1	1	1
C14orf132	0.428135	0.355834	0.454771	-0.0906795	4.07512e-05	0.00057798	1.27929e-05	0.468442	0	0	0	0	0
C14orf142	0.318559	0.610638	0.674326	0.438237	0.00317012	9.53532e-11	1.08594e-12	3.96366e-05	0	1	1	0	0
C14orf159	-0.0630454	-0.328933	-0.247465	-0.15429	0.602559	0.00159294	0.0257059	0.196243	0	0	0	0	0
C14orf166	0.788867	0.820452	0.8048	0.835772	0	0	0	0	1	1	1	1	1
C14orf169	0.389676	0.433791	0.427799	0.278572	0.000224086	1.7477e-05	4.70637e-05	0.0136791	0	0	0	0	0
C14orf2	0.820738	0.862414	0.901105	0.667243	0	0	0	4.01176e-12	1	1	1	1	1
C14orf28	0.341628	0.327151	0.261671	0.341889	0.00143522	0.00170044	0.0178589	0.00195172	0	0	0	0	0
C14orf37	0.316551	0.121322	0.163073	-0.130005	0.00338546	0.276501	0.153161	0.283632	0	0	0	0	0
C14orf79	0.339439	0.310785	0.258341	-0.110809	0.00155132	0.00300552	0.0194903	0.367468	0	0	0	0	0
C14orf80	-0.100723	-0.112818	-0.147534	-0.0693659	0.392224	0.31322	0.198959	0.587266	0	0	0	0	0
C14orf93	-0.394862	-0.556927	-0.623365	-0.147613	0.000180213	8.14954e-09	1.52951e-10	0.218091	0	-1	-1	0	0
C15orf27	0.332583	0.479598	0.469523	-0.136245	0.001976	1.42939e-06	5.9802e-06	0.258785	0	0	0	0	0
C15orf38-AP3S2	-0.0180402	-0.111532	0.136747	-0.165794	0.886587	0.319182	0.235981	0.162293	0	0	0	0	0
C15orf40	-0.24274	-0.229043	-0.192279	-0.0974579	0.0281364	0.0327312	0.0887274	0.433251	0	0	0	0	0
C15orf41	0.28783	0.282851	0.26081	0.49046	0.00830751	0.00738463	0.0182726	2.72408e-06	0	0	0	0	0
C15orf52	-0.562977	-0.645503	-0.7116	-0.222835	1.39282e-08	3.30351e-12	1.48821e-14	0.0538972	-1	-1	-1	0	0
C15orf57	0.51108	0.456449	0.402496	0.106332	4.55479e-07	5.28672e-06	0.000145535	0.388978	1	0	0	0	0
C15orf59	-0.52879	-0.425207	-0.473378	-0.461027	1.47639e-07	2.68666e-05	4.86885e-06	1.3045e-05	-1	0	0	0	0
C15orf61	0.38736	0.437687	0.559562	-0.0214266	0.000246756	1.43336e-05	2.37634e-08	0.875239	0	0	1	0	0
C15orf62	-0.704069	-0.694803	-0.795191	-0.632689	2.36263e-14	1.26093e-14	0	1.08706e-10	-1	-1	-1	-1	-1
C15orf65	0.313973	0.331338	0.433368	0.125372	0.00368171	0.00146024	3.62638e-05	0.302802	0	0	0	0	0
C16orf13	0.498725	0.548459	0.634598	0.214962	9.6058e-07	1.52704e-08	5.55373e-11	0.0638906	0	1	1	0	0
C16orf45	0.699118	0.878576	0.885905	0.281986	4.29652e-14	0	0	0.0124632	1	1	1	0	0
C16orf46	-0.0483854	-0.001667	0.0771361	-0.162574	0.693098	0.989627	0.517372	0.17138	0	0	0	0	0
C16orf52	0.437431	0.601922	0.644964	0.238764	2.61185e-05	2.07055e-10	2.10127e-11	0.0375741	0	1	1	0	0
C16orf58	0.531779	0.600931	0.568558	0.302901	1.21265e-07	2.25937e-10	1.24539e-08	0.00682429	1	1	1	0	0
C16orf62	0.495172	0.402102	0.4257	0.224226	1.18197e-06	8.06796e-05	5.18488e-05	0.0522748	0	0	0	0	0
C16orf70	0.842634	0.810681	0.794452	0.891357	0	0	0	0	1	1	1	1	1
C16orf72	0.667442	0.7533	0.798033	0.603418	1.44031e-12	0	0	1.33588e-09	1	1	1	1	1
C16orf74	0.0033853	-0.435068	-0.414335	-0.417347	0.979874	1.63799e-05	8.65993e-05	0.000103042	0	0	0	0	0
C16orf87	0.612856	0.554785	0.781491	0.484608	2.62106e-10	9.55423e-09	0	3.76862e-06	1	1	1	0	0
C16orf89	-0.217675	-0.363391	-0.31548	-0.296788	0.0508686	0.000427556	0.00372814	0.00816936	0	0	0	0	0
C16orf91	0.582447	0.645682	0.730178	0.335145	3.19516e-09	3.24347e-12	1.37341e-15	0.00245644	1	1	1	0	0
C16orf93	0.342761	0.259326	0.422626	0.0695309	0.00137921	0.0146875	5.96791e-05	0.586382	0	0	0	0	0
C17orf100	0.401997	0.37145	0.388621	0.335098	0.000132785	0.000307839	0.00026032	0.00245909	0	0	0	0	0
C17orf102	0.317164	0.535169	0.556234	0.153849	0.00331877	3.97817e-08	3.00235e-08	0.197641	0	1	1	0	0
C17orf104	0.351156	0.556576	0.581523	0.219926	0.00101551	8.36874e-09	4.74428e-09	0.057456	0	1	1	0	0
C17orf107	-0.224024	-0.0619539	0.00911453	-0.258426	0.044079	0.59093	0.94148	0.0232206	0	0	0	0	0
C17orf49	0.729323	0.764538	0.67312	0.496294	0	0	1.23321e-12	1.96464e-06	1	1	1	0	0
C17orf51	0.150754	0.174469	0.309394	-0.129881	0.188411	0.110187	0.00451757	0.284137	0	0	0	0	0
C17orf58	0.621099	0.562279	0.596011	0.455891	1.27056e-10	5.42681e-09	1.52669e-09	1.68011e-05	1	1	1	0	0
C17orf59	0.0452099	0.0632839	-0.0411503	-0.0766755	0.712012	0.582592	0.735008	0.545368	0	0	0	0	0
C17orf62	-0.306101	-0.334037	-0.428681	-0.0985381	0.00474335	0.00132253	4.52386e-05	0.42793	0	0	0	0	0
C17orf67	-0.427053	-0.452504	-0.438512	-0.214438	4.28925e-05	6.55969e-06	2.841e-05	0.0646201	0	0	0	0	0
C17orf70	-0.260932	-0.328833	-0.370195	-0.344473	0.0176464	0.00159887	0.000541013	0.00178546	0	0	0	0	0
C17orf75	0.444956	0.691504	0.68385	0.196719	1.80255e-05	1.88589e-14	3.83513e-13	0.0926046	0	1	1	0	0
C17orf80	0.292271	0.27159	0.28743	0.256612	0.00727228	0.010324	0.00875557	0.0243161	0	0	0	0	0
C17orf85	-0.13399	-0.114662	0.017687	0.204461	0.246367	0.305078	0.887075	0.0794364	0	0	0	0	0
C17orf89	0.293332	0.274416	0.257489	0.148011	0.00704095	0.00950525	0.0199268	0.216708	0	0	0	0	0
C17orf96	0.0324033	0.158457	0.229149	-0.179864	0.794197	0.149248	0.0400385	0.126819	0	0	0	0	0
C17orf97	-0.0219972	0.104789	0.25444	-0.133518	0.861362	0.351089	0.0215581	0.269475	0	0	0	0	0
C18orf21	0.549259	0.672648	0.66764	0.579976	3.72005e-08	1.74748e-13	2.19199e-12	8.24359e-09	1	1	1	1	1
C18orf25	0.301685	0.631557	0.678566	0.283126	0.0054426	1.33225e-11	6.85753e-13	0.0120779	0	1	1	0	0
C18orf32	0.634043	0.665606	0.643925	0.611893	3.93692e-11	3.86176e-13	2.32098e-11	6.65931e-10	1	1	1	1	1
C18orf42	0.614979	0.648397	0.721911	0.221532	2.17685e-10	2.45489e-12	3.95485e-15	0.0554188	1	1	1	0	0
C18orf54	-0.275776	-0.378408	-0.423006	0.0524764	0.0117838	0.000229492	5.86854e-05	0.686774	0	0	0	0	0
C18orf8	0.676837	0.775901	0.82895	0.744782	5.29733e-13	0	0	0	1	1	1	1	1
C19orf12	0.482061	0.639262	0.671901	0.045776	2.52068e-06	6.20605e-12	1.4014e-12	0.72677	0	1	1	0	0
C19orf24	-0.241693	-0.0989043	-0.187595	-0.265953	0.0288854	0.380466	0.0972916	0.0191746	0	0	0	0	0
C19orf25	-0.19823	-0.325841	-0.411153	-0.377	0.0776095	0.00178049	9.98384e-05	0.000542803	0	0	0	0	0
C19orf26	-0.422296	-0.520427	-0.410454	-0.539075	5.36382e-05	1.09481e-07	0.000102958	1.43257e-07	0	-1	0	-1	0
C19orf43	0.589871	0.66712	0.563113	0.438042	1.77939e-09	3.26095e-13	1.84513e-08	3.99922e-05	1	1	1	0	0
C19orf44	-0.62946	-0.611965	-0.547824	-0.628666	5.98662e-11	8.44406e-11	5.35826e-08	1.55844e-10	-1	-1	-1	-1	-1
C19orf47	-0.521285	-0.409134	-0.516814	-0.467725	2.40188e-07	5.81771e-05	4.00517e-07	9.2682e-06	-1	0	-1	0	0
C19orf48	-0.00675315	-0.00260367	-0.028804	0.014126	0.959654	0.983331	0.815766	0.918996	0	0	0	0	0
C19orf52	0.146622	-0.0653815	-0.184231	0.084427	0.201786	0.569473	0.103931	0.502251	0	0	0	0	0
C19orf53	0.632697	0.632465	0.677699	0.388532	4.4674e-11	1.21945e-11	7.52843e-13	0.000344947	1	1	1	0	0
C19orf54	-0.72336	-0.757361	-0.657337	-0.47282	2.48975e-15	0	6.27277e-12	7.08876e-06	-1	-1	-1	0	0
C19orf60	0.275429	0.21608	0.270383	0.0548665	0.0118983	0.0447464	0.0141432	0.672252	0	0	0	0	0
C19orf66	0.370479	0.496948	0.30137	-0.0887441	0.000486699	4.99608e-07	0.00579338	0.478945	0	0	0	0	0
C19orf70	0.545396	0.626054	0.591167	0.231477	4.85589e-08	2.26705e-11	2.24633e-09	0.04446	1	1	1	0	0
C19orf71	-0.370986	-0.415809	-0.466585	-0.474834	0.00047728	4.24502e-05	6.98145e-06	6.36669e-06	0	0	0	0	0
C1D	0.649788	0.714549	0.781133	0.650633	8.67349e-12	1.44989e-15	0	2.06015e-11	1	1	1	1	1
C1GALT1	0.0572502	0.266403	0.285357	0.420525	0.63736	0.0119971	0.00929519	8.94799e-05	0	0	0	0	0
C1GALT1C1	0.697797	0.692122	0.741337	0.725242	5.06394e-14	1.6996e-14	0	5.46724e-15	1	1	1	1	1
C1orf101	0.105939	0.264561	0.126187	0.0105292	0.366144	0.0126516	0.276045	0.940343	0	0	0	0	0
C1orf109	0.669699	0.673195	0.683733	0.45068	1.14084e-12	1.64137e-13	3.88563e-13	2.18054e-05	1	1	1	0	0
C1orf111	-0.346951	-0.380021	-0.374852	-0.42024	0.00118427	0.000214143	0.000451887	9.06684e-05	0	0	0	0	0
C1orf112	0.046895	-0.20692	-0.0679874	0.367008	0.701689	0.0553423	0.570198	0.000793325	0	0	0	0	0
C1orf115	0.694402	0.856371	0.87379	0.10727	7.44639e-14	0	0	0.384296	1	1	1	0	0
C1orf122	0.291166	0.142947	0.0639631	0.286589	0.0075168	0.195924	0.594017	0.0109555	0	0	0	0	0
C1orf123	0.626629	0.691075	0.637437	0.59438	7.75423e-11	1.94677e-14	4.26979e-11	2.75063e-09	1	1	1	1	1
C1orf131	0.227652	0.220678	0.264003	0.529578	0.0404566	0.0401523	0.0167905	2.64561e-07	0	0	0	1	0
C1orf132	-0.600587	-0.573992	-0.545528	-0.460479	7.41405e-10	2.16377e-09	6.24981e-08	1.34041e-05	-1	-1	-1	0	0
C1orf159	-0.520825	-0.526405	-0.419303	-0.469904	2.47335e-07	7.3039e-08	6.93982e-05	8.26935e-06	-1	-1	0	0	0
C1orf162	0.167038	-0.0956138	-0.0805742	0.289487	0.141933	0.396952	0.497369	0.0100912	0	0	0	0	0
C1orf174	0.182162	0.321569	0.242475	0.194375	0.107069	0.00207288	0.0291042	0.096805	0	0	0	0	0
C1orf194	0.0781747	0.189186	0.25375	-0.0206653	0.514221	0.0815864	0.0219413	0.879768	0	0	0	0	0
C1orf198	-0.239296	-0.428336	-0.45279	0.164145	0.0306178	2.30309e-05	1.41273e-05	0.16688	0	0	0	0	0
C1orf204	0.45115	0.583191	0.639842	0.211084	1.31642e-05	1.02195e-09	3.40787e-11	0.0693137	0	1	1	0	0
C1orf21	0.341288	0.460846	0.34801	-0.165531	0.0014525	4.15476e-06	0.0012357	0.162996	0	0	0	0	0
C1orf210	-0.356181	-0.418478	-0.595649	-0.317452	0.00084342	3.72972e-05	1.57101e-09	0.00437356	0	0	-1	0	0
C1orf216	0.821454	0.86324	0.871126	0.37038	0	0	0	0.000698842	1	1	1	0	0
C1orf220	-0.364542	-0.182844	-0.394098	-0.340966	0.000613779	0.0930298	0.00020767	0.00201671	0	0	0	0	0
C1orf226	-0.528091	-0.385653	-0.471824	-0.311694	1.54488e-07	0.000167966	5.29226e-06	0.00521822	-1	0	0	0	0
C1orf228	-0.311808	-0.366175	-0.373072	-0.231864	0.00395356	0.000382017	0.000484181	0.0440561	0	0	0	0	0
C1orf229	-0.437857	-0.462648	-0.271534	-0.41893	2.55839e-05	3.76228e-06	0.0137081	9.60375e-05	0	0	0	0	0
C1orf233	-0.423905	-0.172791	-0.375574	-0.390016	4.97269e-05	0.113914	0.000439498	0.000325439	0	0	0	0	0
C1orf27	0.394295	0.153857	0.138539	0.545308	0.000184477	0.162154	0.229545	9.52561e-08	0	0	0	1	0
C1orf35	-0.221868	-0.176098	-0.203632	-0.160758	0.0462936	0.106722	0.0703788	0.176489	0	0	0	0	0
C1orf43	0.673654	0.738805	0.793223	0.720616	7.46247e-13	0	0	1.04399e-14	1	1	1	1	1
C1orf50	0.602205	0.420715	0.571606	0.329669	6.48653e-10	3.34924e-05	9.96695e-09	0.0029426	1	0	1	0	0
C1orf52	0.650381	0.680428	0.76084	0.6597	8.18867e-12	7.06375e-14	0	8.62941e-12	1	1	1	1	1
C1orf54	0.139902	-0.196829	-0.174331	0.00832644	0.224792	0.0691991	0.125393	0.953272	0	0	0	0	0
C1orf56	-0.444068	-0.574044	-0.547012	-0.0572114	1.88415e-05	2.15524e-09	5.65915e-08	0.658631	0	-1	-1	0	0
C1orf61	0.144026	-0.117944	-0.158046	-0.146989	0.210602	0.290836	0.167152	0.220153	0	0	0	0	0
C1orf64	-0.478981	-0.53048	-0.611787	-0.488217	2.99031e-06	5.51842e-08	4.14813e-10	3.08459e-06	0	-1	-1	0	0
C1orf74	0.582848	0.624829	0.689738	0.636947	3.09692e-09	2.5499e-11	1.97427e-13	7.40355e-11	1	1	1	1	1
C1orf86	-0.661165	-0.744979	-0.734522	-0.701063	2.77522e-12	0	7.1499e-16	1.00008e-13	-1	-1	-1	-1	-1
C1orf87	-0.0382173	-0.0412762	-0.0207572	0.150034	0.757643	0.724872	0.867434	0.210031	0	0	0	0	0
C1orf95	-0.261981	-0.214237	-0.151176	-0.391536	0.017155	0.0467353	0.187597	0.000306096	0	0	0	0	0
C1QA	0.272063	0.122012	0.0540354	0.296934	0.013072	0.273599	0.654594	0.00813686	0	0	0	0	0
C1QB	0.227116	0.0499313	0.0302591	0.271099	0.0409769	0.668286	0.806423	0.0167139	0	0	0	0	0
C1QBP	0.855336	0.847426	0.860242	0.858148	0	0	0	0	1	1	1	1	1
C1QC	0.0731531	-0.0966637	-0.14041	0.129749	0.542956	0.391744	0.222939	0.284622	0	0	0	0	0
C1QL1	-0.259656	-0.338455	-0.419414	-0.42664	0.0182474	0.00112412	6.90648e-05	6.77403e-05	0	0	0	0	0
C1QL2	-0.139263	-0.468057	-0.417313	-0.584293	0.226998	2.77404e-06	7.58735e-05	5.95271e-09	0	0	0	-1	0
C1QL3	0.543441	0.719547	0.815855	0.145883	5.54347e-08	0	0	0.223905	1	1	1	0	0
C1QTNF1	-0.307444	-0.366134	-0.571599	-0.538833	0.00454559	0.000382646	9.9703e-09	1.45605e-07	0	0	-1	-1	0
C1QTNF3	0.119206	-0.236483	-0.122635	0.349243	0.306157	0.0271258	0.290491	0.0015095	0	0	0	0	0
C1QTNF3-AMACR	0.255994	0.186254	0.305174	0.248545	0.0200682	0.0867667	0.00515653	0.0297285	0	0	0	0	0
C1QTNF4	0.139507	0.0936362	0.0794141	-0.209071	0.226073	0.407192	0.50387	0.0722639	0	0	0	0	0
C1QTNF5	-0.0292293	-0.336014	-0.357047	0.0266677	0.814826	0.00122954	0.000888122	0.844024	0	0	0	0	0
C1QTNF6	-0.612546	-0.650801	-0.659235	-0.318718	2.6918e-10	1.90833e-12	5.18156e-12	0.00419672	-1	-1	-1	0	0
C1QTNF9B	-0.0598721	0.221546	0.235643	-0.150158	0.62139	0.0393598	0.0343107	0.209644	0	0	0	0	0
C1R	-0.0525785	-0.131048	-0.188804	0.106502	0.667067	0.238057	0.0950365	0.388207	0	0	0	0	0
C1RL	-0.103631	-0.121039	-0.166853	-0.205395	0.377518	0.277679	0.143418	0.0779573	0	0	0	0	0
C1S	0.0149176	-0.051378	0.0285862	0.226355	0.906559	0.658445	0.816885	0.0498541	0	0	0	0	0
C2	0.0901848	0.231747	0.207483	0.24578	0.447288	0.03061	0.0649216	0.0318196	0	0	0	0	0
C20orf194	0.112834	-0.116272	-0.0366763	0.245219	0.333868	0.298043	0.764406	0.0322439	0	0	0	0	0
C20orf196	0.0675755	0.00784207	0.234152	0.19297	0.575411	0.948725	0.0355672	0.0995239	0	0	0	0	0
C20orf203	-0.300325	-0.173665	-0.220565	-0.216322	0.00567728	0.111958	0.0487494	0.0621395	0	0	0	0	0
C20orf24	0.653293	0.655688	0.708446	0.664758	6.13533e-12	1.13632e-12	2.1922e-14	5.1849e-12	1	1	1	1	1
C20orf27	0.0126852	0.0411311	-0.0360546	-0.344327	0.921384	0.725789	0.768433	0.00179428	0	0	0	0	0
C20orf96	-0.546163	-0.66415	-0.575129	-0.52694	4.60716e-08	4.52582e-13	7.68343e-09	3.11995e-07	-1	-1	-1	-1	-1
C21orf2	-0.351478	-0.406626	-0.416057	-0.528458	0.00100372	6.54479e-05	8.02597e-05	2.83981e-07	0	0	0	-1	0
C21orf33	-0.0552193	0.00150686	-0.0457231	0.0164569	0.650119	0.990672	0.706108	0.904375	0	0	0	0	0
C21orf59	0.745753	0.662997	0.735676	0.581659	0	5.14301e-13	7.1499e-16	7.2839e-09	1	1	1	1	1
C21orf62	-0.625261	-0.726102	-0.733192	-0.284546	8.77508e-11	0	1.37341e-15	0.0116093	-1	-1	-1	0	0
C21orf62-AS1	-0.385404	-0.420745	-0.467486	0.0227714	0.000267276	3.34512e-05	6.6586e-06	0.867261	0	0	0	0	0
C21orf91	0.0188777	0.0548967	0.0937935	0.303231	0.881095	0.635678	0.425717	0.00675601	0	0	0	0	0
C22orf23	-0.183069	-0.274553	-0.485862	0.12172	0.105226	0.00946951	2.46431e-06	0.318669	0	0	0	0	0
C22orf24	-0.0386975	-0.0951976	-0.0956823	-0.309772	0.754417	0.399112	0.415767	0.00553949	0	0	0	0	0
C22orf29	-0.238312	-0.113228	0.0357994	-0.264172	0.0313673	0.311391	0.770152	0.0200804	0	0	0	0	0
C22orf39	0.462911	0.40214	0.495708	0.0405894	7.12807e-06	8.05486e-05	1.40943e-06	0.757744	0	0	0	0	0
C22orf46	-0.572142	-0.565006	-0.553958	-0.452741	7.05484e-09	4.39839e-09	3.50773e-08	1.96681e-05	-1	-1	-1	0	0
C2CD2	-0.376351	-0.474055	-0.348795	-0.381021	0.000385949	1.97082e-06	0.00120142	0.00046424	0	0	0	0	0
C2CD2L	0.261057	0.270932	0.357341	-0.167525	0.0175841	0.0105235	0.000878976	0.157674	0	0	0	0	0
C2CD3	-0.258794	-0.434165	-0.2628	-0.172095	0.0186669	1.71433e-05	0.0173295	0.145446	0	0	0	0	0
C2CD4C	-0.356703	-0.407141	-0.341018	-0.55215	0.000827108	6.38696e-05	0.00158266	6.03293e-08	0	0	0	-1	0
C2CD5	0.667509	0.80988	0.835779	0.254266	1.43116e-12	0	0	0.0258084	1	1	1	0	0
C2orf15	0.333159	0.407113	0.111621	-0.00890131	0.00193694	6.39469e-05	0.339277	0.949651	0	0	0	0	0
C2orf40	0.140729	0.316972	0.432124	0.185174	0.221912	0.00243472	3.84597e-05	0.115083	0	0	0	0	0
C2orf42	0.255159	0.243149	0.325552	0.333529	0.020503	0.0228191	0.00268163	0.00258864	0	0	0	0	0
C2orf43	0.50846	0.496249	0.553983	0.513066	5.35721e-07	5.22107e-07	3.50197e-08	7.31415e-07	1	0	1	1	0
C2orf44	0.331361	0.15165	0.303663	0.437402	0.0020608	0.168736	0.00540456	4.11501e-05	0	0	0	0	0
C2orf47	0.595799	0.671862	0.737109	0.460289	1.09925e-09	1.91069e-13	0	1.35313e-05	1	1	1	0	0
C2orf49	0.564565	0.410692	0.41587	0.518796	1.24007e-08	5.40571e-05	8.08996e-05	5.17727e-07	1	0	0	1	0
C2orf50	0.0512253	0.0256774	0.148674	-0.207726	0.675469	0.828726	0.195348	0.0743401	0	0	0	0	0
C2orf68	-0.267748	-0.370864	-0.358021	0.105431	0.0146927	0.000315429	0.00085717	0.393076	0	0	0	0	0
C2orf69	0.535609	0.643331	0.666448	0.624804	9.40746e-08	4.12001e-12	2.47953e-12	2.19712e-10	1	1	1	1	1
C2orf72	-0.221828	-0.625655	-0.633612	-0.419436	0.0463368	2.35649e-11	6.08393e-11	9.39176e-05	0	-1	-1	0	0
C2orf74	0.529937	0.612279	0.667787	0.520227	1.37026e-07	8.20702e-11	2.15928e-12	4.73881e-07	1	1	1	1	1
C2orf76	0.449961	0.424659	0.310633	0.442947	1.39901e-05	2.76279e-05	0.00434539	3.17515e-05	0	0	0	0	0
C2orf80	0.762402	0.825657	0.865689	0.340403	0	0	0	0.002057	1	1	1	0	0
C2orf82	-0.125974	-0.415406	-0.456429	-0.119414	0.277282	4.32736e-05	1.17781e-05	0.328774	0	0	0	0	0
C2orf83	-0.460269	-0.43552	-0.552865	-0.435563	8.19311e-06	1.60079e-05	3.78225e-08	4.49711e-05	0	0	-1	0	0
C2orf88	0.0705863	-0.175922	-0.16575	0.33933	0.557452	0.107088	0.146209	0.00213199	0	0	0	0	0
C2orf91	-0.0832879	-0.0843265	0.00274368	-0.096048	0.48563	0.45787	0.982832	0.440381	0	0	0	0	0
C3	0.0466421	-0.132377	-0.222215	0.179298	0.70321	0.233145	0.0469501	0.12807	0	0	0	0	0
C3AR1	0.269866	-0.0945336	-0.167532	0.29147	0.01387	0.402605	0.141698	0.0095303	0	0	0	0	0
C3orf14	0.799589	0.79855	0.871911	0.471801	0	0	0	7.47907e-06	1	1	1	0	0
C3orf17	0.718876	0.730224	0.709294	0.638555	3.65993e-15	0	1.96149e-14	6.42079e-11	1	1	1	1	1
C3orf18	0.0120867	0.476853	0.378905	-0.0745717	0.925373	1.67789e-06	0.000385384	0.556819	0	0	0	0	0
C3orf33	0.107837	-0.103876	0.0992448	-0.204133	0.357112	0.355549	0.397921	0.0799361	0	0	0	0	0
C3orf35	-0.0316723	-0.0934958	-0.00503828	-0.0946023	0.798786	0.407844	0.968187	0.447819	0	0	0	0	0
C3orf38	0.451567	0.335764	0.49281	0.5895	1.28862e-05	0.0012411	1.66266e-06	4.02658e-09	0	0	0	1	0
C3orf58	-0.0292452	0.362969	0.455255	0.484384	0.814748	0.000434746	1.24836e-05	3.81625e-06	0	0	0	0	0
C3orf62	-0.671252	-0.680966	-0.678302	-0.570958	9.69624e-13	6.66792e-14	7.05922e-13	1.60594e-08	-1	-1	-1	-1	-1
C3orf70	-0.307005	-0.617087	-0.576879	-0.535995	0.00460919	5.28506e-11	6.75009e-09	1.75388e-07	0	-1	-1	-1	0
C3orf80	0.511058	0.70381	0.787133	0.207065	4.55897e-07	4.16713e-15	0	0.0753461	1	1	1	0	0
C4A	-0.0991568	-0.227367	-0.283979	0.107886	0.400254	0.0341432	0.00967067	0.381326	0	0	0	0	0
C4B	-0.0761876	-0.234219	-0.333983	0.114959	0.525526	0.0287435	0.00201819	0.348511	0	0	0	0	0
C4BPB	-0.515494	-0.573189	-0.59405	-0.358189	3.46467e-07	2.30842e-09	1.78495e-09	0.00109628	-1	-1	-1	0	0
C4orf19	-0.500133	-0.636329	-0.725782	-0.480156	8.83498e-07	8.32425e-12	2.67958e-15	4.79309e-06	-1	-1	-1	0	0
C4orf22	-0.224418	0.0236259	0.300761	0.0345302	0.0436752	0.842078	0.00589869	0.795498	0	0	0	0	0
C4orf26	-0.575769	-0.583241	-0.613923	-0.469915	5.34779e-09	1.01776e-09	3.46444e-10	8.26734e-06	-1	-1	-1	0	0
C4orf27	0.817203	0.860321	0.888581	0.8251	0	0	0	0	1	1	1	1	1
C4orf29	0.540276	0.41902	0.401101	0.497501	6.88626e-08	3.63528e-05	0.000154495	1.83483e-06	1	0	0	0	0
C4orf3	0.378122	0.456104	0.450405	0.0443962	0.000359015	5.3845e-06	1.5904e-05	0.73466	0	0	0	0	0
C4orf32	-0.299582	-0.237434	-0.346716	0.219331	0.00580605	0.0264826	0.0012939	0.0582414	0	0	0	0	0
C4orf33	0.664716	0.829862	0.781015	0.695239	1.9183e-12	0	0	1.97263e-13	1	1	1	1	1
C4orf46	0.103873	0.249313	0.201643	0.366324	0.376322	0.0193287	0.0733489	0.000813029	0	0	0	0	0
C4orf47	-0.30021	-0.228597	-0.272689	0.063451	0.00569591	0.0331024	0.013276	0.620813	0	0	0	0	0
C4orf48	-0.154453	-0.125806	-0.152418	-0.13571	0.176997	0.258567	0.183803	0.260853	0	0	0	0	0
C4orf50	-0.115299	0.115165	0.30068	-0.150012	0.322863	0.302915	0.00591203	0.210083	0	0	0	0	0
C5	0.0266077	-0.315091	-0.250497	0.177006	0.831309	0.00259506	0.0238262	0.133451	0	0	0	0	0
C5AR1	0.0653007	-0.320974	-0.218921	0.0228787	0.588777	0.00211725	0.0505768	0.866794	0	0	0	0	0
C5orf15	0.497245	0.490688	0.556174	0.563263	1.04757e-06	7.35102e-07	3.01474e-08	2.77799e-08	0	0	1	1	0
C5orf22	0.805901	0.876901	0.876316	0.709884	0	0	0	3.33587e-14	1	1	1	1	1
C5orf24	-0.129501	-0.0954833	-0.0437348	-0.00885845	0.263293	0.39768	0.718494	0.94993	0	0	0	0	0
C5orf28	0.0933416	0.416329	0.386386	0.197672	0.430495	4.14127e-05	0.000284996	0.0908772	0	0	0	0	0
C5orf30	0.340463	0.325832	0.523136	0.535858	0.00149607	0.00178088	2.69337e-07	1.7697e-07	0	0	1	1	0
C5orf34	0.425201	0.57283	0.61577	0.361091	4.67885e-05	2.37649e-09	2.96104e-10	0.000985117	0	1	1	0	0
C5orf42	0.353688	0.20384	0.226314	0.0228408	0.000925266	0.0592974	0.0427518	0.866958	0	0	0	0	0
C5orf45	0.209544	0.35716	0.204294	0.0083125	0.0610536	0.000548381	0.0694184	0.953301	0	0	0	0	0
C5orf49	0.200801	-0.225539	-0.109928	-0.119492	0.073608	0.0357039	0.346877	0.328477	0	0	0	0	0
C5orf51	0.425301	0.232898	0.295189	0.466088	4.6567e-05	0.0297129	0.00697112	1.00774e-05	0	0	0	0	0
C5orf56	-0.0602722	-0.216764	-0.376101	-0.0268257	0.61925	0.0440413	0.000430531	0.843124	0	0	0	0	0
C5orf63	-0.122762	-0.101346	-0.0803355	-0.0222676	0.29069	0.368157	0.498725	0.870322	0	0	0	0	0
C5orf64	-0.082893	-0.245329	-0.228993	0.102569	0.48792	0.021519	0.040183	0.407467	0	0	0	0	0
C5orf66	-0.292373	-0.311157	-0.249844	0.0141292	0.00724963	0.00296728	0.0242191	0.918996	0	0	0	0	0
C6orf1	0.332622	0.420205	0.288643	0.157339	0.00197355	3.43411e-05	0.00845377	0.186819	0	0	0	0	0
C6orf106	-0.197433	0.324112	0.362028	-0.155339	0.0788844	0.00189482	0.000737791	0.19294	0	0	0	0	0
C6orf118	-0.502249	-0.651147	-0.670152	-0.611963	7.78916e-07	1.84166e-12	1.68549e-12	6.62352e-10	-1	-1	-1	-1	-1
C6orf120	0.724006	0.748161	0.777304	0.736086	2.48975e-15	0	0	0	1	1	1	1	1
C6orf136	0.460399	0.494714	0.463887	0.0276701	8.14076e-06	5.74206e-07	8.04192e-06	0.838095	0	0	0	0	0
C6orf163	-0.252991	-0.132372	-0.189348	-0.179775	0.0216721	0.233151	0.0940492	0.127015	0	0	0	0	0
C6orf165	0.270963	0.507412	0.713466	0.163544	0.0134712	2.57559e-07	1.19236e-14	0.168585	0	1	1	0	0
C6orf203	0.654607	0.666618	0.676588	0.286306	5.39146e-12	3.44677e-13	8.50466e-13	0.0110412	1	1	1	0	0
C6orf226	0.140497	0.0220224	0.0785254	0.165333	0.222717	0.852865	0.509213	0.163529	0	0	0	0	0
C6orf47	0.140632	0.222628	0.111513	0.193118	0.222259	0.0383543	0.339761	0.0992464	0	0	0	0	0
C6orf48	0.525184	0.558966	0.342166	0.27577	1.86933e-07	6.9799e-09	0.00151921	0.0147584	1	1	0	0	0
C6orf62	-0.0039666	-0.0475709	0.0268793	-0.0285373	0.976384	0.683897	0.827844	0.832563	0	0	0	0	0
C6orf89	0.695455	0.637988	0.674997	0.67093	6.56604e-14	7.05422e-12	1.00992e-12	2.71604e-12	1	1	1	1	1
C7	-0.0149177	-0.00653054	-0.115555	0.094268	0.906559	0.957254	0.321415	0.449412	0	0	0	0	0
C7orf13	0.322541	0.224593	0.315464	0.437931	0.00277726	0.0365518	0.00372982	4.01988e-05	0	0	0	0	0
C7orf25	0.717366	0.614915	0.772817	0.682125	4.80036e-15	6.45544e-11	0	8.33856e-13	1	1	1	1	1
C7orf26	-0.200394	-0.0340747	-0.18469	0.0189013	0.0742151	0.772278	0.103	0.890298	0	0	0	0	0
C7orf43	0.20473	0.279984	0.160134	-0.167072	0.0677224	0.00805331	0.161208	0.158886	0	0	0	0	0
C7orf49	-0.393337	-0.391366	-0.46701	0.00476347	0.000191992	0.000130986	6.82623e-06	0.973371	0	0	0	0	0
C7orf50	-0.029312	0.128363	0.0737577	-0.28028	0.814279	0.248414	0.536521	0.0130591	0	0	0	0	0
C7orf55	-0.380053	-0.565034	-0.556658	-0.242388	0.000331882	4.38975e-09	2.9161e-08	0.0344818	0	-1	-1	0	0
C7orf55-LUC7L2	0.410765	0.252295	0.2415	0.399704	9.04353e-05	0.0178186	0.0298059	0.000219235	0	0	0	0	0
C7orf60	0.346728	0.285846	0.32053	0.0231924	0.00119357	0.00673512	0.00316563	0.864946	0	0	0	0	0
C7orf61	-0.451231	-0.458476	-0.482429	-0.260422	1.31101e-05	4.73653e-06	2.98105e-06	0.0220765	0	0	0	0	0
C7orf73	-0.0965724	-0.348311	-0.285567	-0.111662	0.413609	0.000774813	0.00923854	0.363619	0	0	0	0	0
C8orf33	0.400454	0.23665	0.099303	0.125413	0.000141806	0.0270161	0.397621	0.302625	0	0	0	0	0
C8orf34	0.366959	0.579948	0.751837	0.309382	0.000558409	1.33455e-09	0	0.00560285	0	1	1	0	0
C8orf37	0.200982	0.217658	0.325759	0.46657	0.0733404	0.0431331	0.00266271	9.83743e-06	0	0	0	0	0
C8orf4	0.2954	0.457085	0.510495	0.364069	0.00661315	5.1024e-06	5.89895e-07	0.000883541	0	0	1	0	0
C8orf44	0.113719	-0.0074754	-0.000670041	-0.132781	0.329943	0.951052	0.996058	0.272332	0	0	0	0	0
C8orf44-SGK3	-0.0975748	0.00120752	0.00215888	0.12632	0.408366	0.992494	0.986721	0.29876	0	0	0	0	0
C8orf46	0.67085	0.747396	0.803201	0.769501	1.01159e-12	0	0	0	1	1	1	1	1
C8orf48	-0.0225248	-0.438503	-0.577782	-0.10565	0.857938	1.37458e-05	6.30835e-09	0.392085	0	0	-1	0	0
C8orf58	-0.434997	-0.638711	-0.67901	-0.546429	2.94403e-05	6.55048e-12	6.53292e-13	8.84312e-08	0	-1	-1	-1	0
C8orf59	0.6892	0.813976	0.806898	0.728757	1.34427e-13	0	0	2.8929e-15	1	1	1	1	1
C8orf76	0.593291	0.546035	0.617317	0.454031	1.34931e-09	1.82155e-08	2.5911e-10	1.84477e-05	1	1	1	0	0
C8orf82	-0.244045	-0.350034	-0.551676	-0.378317	0.0272522	0.000725287	4.10836e-08	0.000516209	0	0	-1	0	0
C8orf86	-0.549119	-0.540919	-0.579656	-0.337097	3.75569e-08	2.63917e-08	5.47265e-09	0.00229824	-1	-1	-1	0	0
C8orf88	0.176659	-0.14872	-0.222729	0.203619	0.118941	0.177618	0.0464056	0.0807441	0	0	0	0	0
C9orf114	-0.364282	-0.398436	-0.449547	-0.295626	0.000619775	9.52364e-05	1.65797e-05	0.00844999	0	0	0	0	0
C9orf116	0.65563	0.509251	0.588814	0.193651	4.87492e-12	2.2874e-07	2.70222e-09	0.0982048	1	1	1	0	0
C9orf117	-0.353324	-0.609273	-0.447122	-0.48278	0.000937733	1.07844e-10	1.86971e-05	4.16113e-06	0	-1	0	0	0
C9orf129	0.350589	0.474008	0.447696	-0.0324016	0.00103693	1.9759e-06	1.8181e-05	0.808498	0	0	0	0	0
C9orf131	-0.722057	-0.628436	-0.60916	-0.574969	2.48975e-15	1.80384e-11	5.16741e-10	1.19836e-08	-1	-1	-1	-1	-1
C9orf139	-0.688084	-0.738163	-0.745652	-0.402295	1.51638e-13	0	0	0.000196712	-1	-1	-1	0	0
C9orf142	-0.338531	-0.335333	-0.374854	-0.310997	0.00160214	0.00126073	0.000451887	0.00533142	0	0	0	0	0
C9orf156	0.451624	0.551572	0.521082	0.462906	1.28496e-05	1.2158e-08	3.06909e-07	1.18612e-05	0	1	1	0	0
C9orf16	0.0723468	0.0578023	-0.00839203	-0.338682	0.547348	0.617051	0.946076	0.00217895	0	0	0	0	0
C9orf172	-0.586017	-0.633269	-0.626785	-0.611842	2.41304e-09	1.12594e-11	1.12663e-10	6.6806e-10	-1	-1	-1	-1	-1
C9orf24	-0.0117113	0.275926	0.302244	-0.231137	0.927846	0.00909895	0.00564214	0.0448056	0	0	0	0	0
C9orf3	-0.613949	-0.246237	-0.232002	0.233371	2.38414e-10	0.0209988	0.0374222	0.042596	-1	0	0	0	0
C9orf40	0.0843104	0.423898	0.592124	0.47792	0.47976	2.86819e-05	2.07983e-09	5.39634e-06	0	0	1	0	0
C9orf41	0.271287	0.383697	0.448028	-0.0476221	0.0133502	0.000182951	1.78925e-05	0.715443	0	0	0	0	0
C9orf64	0.375489	0.0101298	0.294578	0.403618	0.0003991	0.933029	0.00709649	0.000186289	0	0	0	0	0
C9orf69	-0.419781	-0.303377	-0.323104	-0.45701	6.01964e-05	0.00385079	0.00290773	1.59185e-05	0	0	0	0	0
C9orf72	0.565132	0.735029	0.776298	0.724017	1.18843e-08	0	0	5.46724e-15	1	1	1	1	1
C9orf78	0.761972	0.640405	0.628549	0.524692	0	5.53831e-12	9.64048e-11	3.58908e-07	1	1	1	1	1
C9orf84	-0.582323	-0.561911	-0.562896	-0.288008	3.22664e-09	5.58421e-09	1.87342e-08	0.01052	-1	-1	-1	0	0
C9orf85	-0.0496204	-0.235836	-0.378436	0.270164	0.685558	0.0275852	0.000392292	0.0171391	0	0	0	0	0
C9orf89	0.0276806	0.104914	-0.0196255	0.0609125	0.824942	0.350483	0.874471	0.636518	0	0	0	0	0
C9orf9	-0.146071	-0.296452	-0.302642	-0.213899	0.203618	0.00482005	0.00557442	0.0653746	0	0	0	0	0
C9orf91	0.545761	0.620692	0.585027	-0.0273917	4.73805e-08	3.77092e-11	3.62679e-09	0.839701	1	1	1	0	0
CA10	0.256149	0.852683	0.877001	0.228537	0.0199883	0	0	0.0474785	0	1	1	0	0
CA11	0.456008	0.640992	0.589156	-0.18775	1.02445e-05	5.22254e-12	2.63117e-09	0.109769	0	1	1	0	0
CA12	-0.0770703	-0.0740859	0.0616783	-0.0933308	0.520362	0.516978	0.607914	0.454313	0	0	0	0	0
CA13	-0.179553	0.0904788	0.0786802	-0.205022	0.112516	0.424178	0.508287	0.0785406	0	0	0	0	0
CA14	0.454245	0.343594	0.344564	0.519818	1.12204e-05	0.000927287	0.00139593	4.86214e-07	0	0	0	1	0
CA15P2	-0.452802	-0.469102	-0.459807	-0.34581	1.20994e-05	2.61389e-06	9.91586e-06	0.00170284	0	0	0	0	0
CA2	-0.1194	-0.145782	-0.0555475	0.281559	0.305271	0.186706	0.645111	0.0126015	0	0	0	0	0
CA4	0.34207	0.259648	0.273299	-0.175016	0.00141374	0.0145561	0.0130547	0.138214	0	0	0	0	0
CA5B	-0.286623	-0.659151	-0.704717	-0.0158097	0.00861008	7.82691e-13	3.45887e-14	0.908943	0	-1	-1	0	0
CA5BP1	-0.446392	-0.478168	-0.428606	-0.325509	1.6775e-05	1.55486e-06	4.53948e-05	0.00337158	0	0	0	0	0
CA7	0.246791	0.227444	0.315362	-0.196428	0.0254021	0.0340788	0.00374153	0.0930944	0	0	0	0	0
CA8	0.00232139	-0.343105	-0.342128	-0.075663	0.986027	0.000944116	0.00152107	0.551047	0	0	0	0	0
CAAP1	0.389747	0.422757	0.360543	0.148586	0.000223429	3.035e-05	0.000780128	0.214714	0	0	0	0	0
CAB39	0.714161	0.809449	0.842653	0.59812	7.02289e-15	0	0	2.03828e-09	1	1	1	1	1
CAB39L	0.329972	0.319928	0.197434	0.0994914	0.00215912	0.00219705	0.0800005	0.423124	0	0	0	0	0
CABIN1	-0.333603	-0.34808	-0.279339	-0.185224	0.00190754	0.00078131	0.0110216	0.114989	0	0	0	0	0
CABLES1	-0.52174	-0.766629	-0.715187	-0.518203	2.33267e-07	0	9.5169e-15	5.36589e-07	-1	-1	-1	-1	-1
CABLES2	-0.57492	-0.45982	-0.507686	-0.443388	5.70233e-09	4.39868e-06	6.99275e-07	3.10984e-05	-1	0	-1	0	0
CABP1	0.48327	0.733324	0.741981	-0.0156202	2.35785e-06	0	0	0.910167	0	1	1	0	0
CABP4	-0.663451	-0.731045	-0.730181	-0.602732	2.19399e-12	0	1.37341e-15	1.40988e-09	-1	-1	-1	-1	-1
CABP7	0.0605712	-0.110768	-0.0280626	-0.198081	0.617336	0.322777	0.820144	0.0901739	0	0	0	0	0
CABYR	0.110924	0.107255	0.315658	0.194869	0.342576	0.339171	0.00370754	0.0959399	0	0	0	0	0
CACFD1	-0.62028	-0.679192	-0.718688	-0.439978	1.36399e-10	8.21835e-14	6.44224e-15	3.64607e-05	-1	-1	-1	0	0
CACHD1	0.165257	-0.668104	-0.670017	-0.442531	0.14652	2.92742e-13	1.70857e-12	3.23568e-05	0	-1	-1	0	0
CACNA1A	-0.341987	-0.341557	-0.3145	-0.358482	0.00141783	0.0010015	0.00384404	0.00108459	0	0	0	0	0
CACNA1B	0.0892583	-0.024664	0.0297174	-0.242388	0.452421	0.835172	0.81005	0.0344818	0	0	0	0	0
CACNA1C	-0.212999	-0.0573338	-0.078239	-0.264995	0.0565326	0.62018	0.510947	0.0196584	0	0	0	0	0
CACNA1C-AS4	-0.309199	-0.265753	-0.218274	-0.256992	0.00429708	0.0122245	0.0512732	0.0240761	0	0	0	0	0
CACNA1D	0.0239304	0.094996	0.227252	-0.190477	0.848842	0.400141	0.0418263	0.104351	0	0	0	0	0
CACNA1E	0.552543	0.622924	0.671098	-0.0423434	2.96385e-08	3.05596e-11	1.52576e-12	0.747001	1	1	1	0	0
CACNA1G	-0.18029	-0.274073	-0.336881	-0.354566	0.110953	0.00960463	0.00182776	0.00124992	0	0	0	0	0
CACNA1H	-0.309496	-0.656586	-0.610862	-0.565604	0.00425752	1.03327e-12	4.48016e-10	2.34971e-08	0	-1	-1	-1	0
CACNA1I	-0.492267	-0.512497	-0.523799	-0.371421	1.39995e-06	1.84964e-07	2.58315e-07	0.000671933	0	-1	-1	0	0
CACNA2D1	0.800627	0.855689	0.89282	0.659155	0	0	0	9.10628e-12	1	1	1	1	1
CACNA2D2	0.34742	0.333212	0.240447	-0.13484	0.00116441	0.00136291	0.030582	0.264173	0	0	0	0	0
CACNA2D3	0.574469	0.66521	0.718819	0.0520414	5.90067e-09	4.03258e-13	6.44224e-15	0.689348	1	1	1	0	0
CACNA2D3-AS1	-0.153707	-0.180931	-0.129635	-0.186595	0.179224	0.0967452	0.262408	0.112119	0	0	0	0	0
CACNB1	0.547766	0.615897	0.691203	0.000870715	4.12722e-08	5.89973e-11	1.67676e-13	0.995621	1	1	1	0	0
CACNB2	0.68853	0.70379	0.767278	0.0205873	1.44743e-13	4.16713e-15	0	0.880156	1	1	1	0	0
CACNB3	-0.265517	0.00242275	0.00878604	-0.269039	0.0156076	0.984466	0.943545	0.0176666	0	0	0	0	0
CACNB4	0.775426	0.873873	0.878066	0.250206	0	0	0	0.0285425	1	1	1	0	0
CACNG2	0.0784155	0.199146	0.291919	-0.184296	0.512824	0.0657462	0.00767775	0.116897	0	0	0	0	0
CACNG3	0.511115	0.563262	0.695006	0.0245666	4.54582e-07	5.03035e-09	1.08932e-13	0.85694	1	1	1	0	0
CACNG4	-0.418609	-0.676392	-0.736148	-0.73978	6.34141e-05	1.12961e-13	7.1499e-16	0	0	-1	-1	-1	0
CACNG5	-0.358902	-0.413062	-0.497212	-0.360395	0.000761673	4.8382e-05	1.29172e-06	0.0010111	0	0	0	0	0
CACNG7	-0.636981	-0.672409	-0.730902	-0.651669	2.9852e-11	1.79909e-13	1.37341e-15	1.86823e-11	-1	-1	-1	-1	-1
CACNG8	0.398567	0.358455	0.42776	-0.0950226	0.000153676	0.000520728	4.71453e-05	0.445582	0	0	0	0	0
CACTIN	-0.329106	-0.338789	-0.394379	-0.372229	0.00222282	0.00111077	0.000205248	0.000651575	0	0	0	0	0
CACUL1	0.620786	0.533252	0.636117	0.561585	1.30473e-10	4.55406e-08	4.82501e-11	3.13155e-08	1	1	1	1	1
CACYBP	0.532206	0.683295	0.720815	0.430208	1.1791e-07	5.09063e-14	4.59696e-15	5.76302e-05	1	1	1	0	0
CACYBPP1	-0.42556	-0.486408	-0.41067	-0.37074	4.60047e-05	9.53402e-07	0.000101958	0.00068976	0	0	0	0	0
CAD	-0.445348	-0.2537	-0.373482	-0.332538	1.76705e-05	0.0171539	0.000476609	0.00267616	0	0	0	0	0
CADM1	0.420911	-0.244558	-0.168757	0.194002	5.71383e-05	0.0219699	0.138615	0.0975111	0	0	0	0	0
CADM2	0.600877	0.67144	0.72769	0.27732	7.23796e-10	2.00425e-13	2.04367e-15	0.0141622	1	1	1	0	0
CADM2-AS1	0.166169	0.210399	0.195486	-0.0529773	0.144182	0.0511299	0.0831944	0.683966	0	0	0	0	0
CADM2-AS2	-0.211001	0.0961979	-0.253292	-0.105687	0.0591081	0.394062	0.0221937	0.3919	0	0	0	0	0
CADM3	0.584833	0.747875	0.739145	-0.0521237	2.64821e-09	0	0	0.688932	1	1	1	0	0
CADM3-AS1	0.101314	-0.0312976	0.0687493	-0.189431	0.38948	0.790745	0.565649	0.106396	0	0	0	0	0
CADM4	0.168537	0.343022	0.193834	0.369906	0.138109	0.000947058	0.086032	0.000711772	0	0	0	0	0
CADPS	0.809332	0.897424	0.891705	0.236995	0	0	0	0.0391416	1	1	1	0	0
CADPS2	0.605599	0.845983	0.857805	0.191999	4.87285e-10	0	0	0.10142	1	1	1	0	0
CAHM	0.244841	0.108393	0.150631	0.198521	0.0267062	0.33375	0.189238	0.0893622	0	0	0	0	0
CALB1	0.632398	0.773182	0.843791	0.263912	4.59177e-11	0	0	0.0202073	1	1	1	0	0
CALB2	0.68431	0.685991	0.631655	0.124869	2.32547e-13	3.65489e-14	7.26353e-11	0.30495	1	1	1	0	0
CALCOCO1	0.229185	-0.125575	0.107437	-0.0107112	0.0390323	0.259414	0.358405	0.939301	0	0	0	0	0
CALCOCO2	-0.174395	-0.389409	-0.518656	0.0290436	0.124064	0.000142774	3.57422e-07	0.829691	0	0	-1	0	0
CALCRL	-0.371211	-0.349285	-0.309894	0.0170614	0.000473287	0.000746943	0.00444837	0.900847	0	0	0	0	0
CALD1	-0.477536	-0.576293	-0.663496	-0.300827	3.23636e-06	1.79678e-09	3.36154e-12	0.00725316	0	-1	-1	0	0
CALHM2	-0.394905	-0.562098	-0.482635	-0.516877	0.000179883	5.50369e-09	2.94641e-06	5.81554e-07	0	-1	0	-1	0
CALM1	0.752819	0.843348	0.868256	0.335092	0	0	0	0.00245909	1	1	1	0	0
CALM2	0.871514	0.91336	0.931768	0.873018	0	0	0	0	1	1	1	1	1
CALM2P2	0.0638233	0.0651789	0.258187	0.3231	0.597876	0.570817	0.0195678	0.00364407	0	0	0	0	0
CALM3	0.753672	0.86216	0.879828	0.144908	0	0	0	0.227364	1	1	1	0	0
CALML4	-0.421715	-0.419365	-0.590571	-0.442098	5.50953e-05	3.57612e-05	2.35457e-09	3.30324e-05	0	0	-1	0	0
CALN1	0.624835	0.63904	0.755254	0.246586	9.12031e-11	6.34247e-12	0	0.0311831	1	1	1	0	0
CALR	0.312419	0.343296	0.489934	0.515194	0.00387364	0.00093735	1.96128e-06	6.45013e-07	0	0	0	1	0
CALU	0.69558	0.511796	0.486943	0.654664	6.56604e-14	1.93707e-07	2.32121e-06	1.41207e-11	1	1	0	1	0
CALY	0.619667	0.739935	0.751031	0.106352	1.44e-10	0	0	0.388936	1	1	1	0	0
CAMK1	0.622361	0.717288	0.729774	0.0662178	1.1385e-10	7.56273e-16	1.37341e-15	0.605554	1	1	1	0	0
CAMK1D	0.181733	0.463815	0.490222	-0.131032	0.107915	3.52567e-06	1.92901e-06	0.279443	0	0	0	0	0
CAMK1G	0.612674	0.715084	0.761188	0.0922745	2.66323e-10	7.56273e-16	0	0.45996	1	1	1	0	0
CAMK2A	0.145674	0.259061	0.282222	-0.213245	0.20496	0.0148004	0.0101646	0.0662435	0	0	0	0	0
CAMK2B	0.537436	0.697406	0.709686	-0.0289752	8.35107e-08	9.39328e-15	1.84472e-14	0.829992	1	1	1	0	0
CAMK2D	0.745948	0.802656	0.852272	0.507992	0	0	0	9.90512e-07	1	1	1	1	1
CAMK2G	0.22236	0.673175	0.667342	0.00745668	0.0457894	1.64137e-13	2.26229e-12	0.957994	0	1	1	0	0
CAMK2N1	0.238831	0.159038	0.290923	-0.0826175	0.0309675	0.147751	0.0079083	0.512209	0	0	0	0	0
CAMK2N2	-0.273541	0.144492	-0.0455275	-0.345125	0.0125437	0.190906	0.707217	0.00174412	0	0	0	0	0
CAMK4	0.797515	0.838676	0.852055	0.208472	0	0	0	0.0732045	1	1	1	0	0
CAMKK1	0.427524	0.710085	0.697401	-0.0546302	4.19679e-05	1.44989e-15	8.25992e-14	0.67381	0	1	1	0	0
CAMKK2	0.555549	0.722311	0.732079	0.0195495	2.39206e-08	0	1.37341e-15	0.886372	1	1	1	0	0
CAMKMT	0.350511	-0.0329526	-0.0569453	0.155918	0.00103999	0.779975	0.636649	0.19111	0	0	0	0	0
CAMKV	0.720179	0.720933	0.734199	-3.25163e-05	2.48975e-15	0	7.1499e-16	0.999906	1	1	1	0	0
CAMLG	0.744886	0.757335	0.807933	0.53421	0	0	0	1.96973e-07	1	1	1	1	1
CAMSAP1	0.658128	0.643512	0.687877	0.215762	3.78121e-12	4.04534e-12	2.43794e-13	0.0628475	1	1	1	0	0
CAMSAP2	0.658992	0.76636	0.761957	0.347989	3.46708e-12	0	0	0.001579	1	1	1	0	0
CAMSAP3	-0.375644	-0.408036	-0.369066	-0.397317	0.000396643	6.12525e-05	0.000564948	0.000241778	0	0	0	0	0
CAMTA1	0.605955	0.763849	0.809314	0.223904	4.72802e-10	0	0	0.0526709	1	1	1	0	0
CAMTA2	-0.47775	-0.370429	-0.414363	-0.436494	3.19888e-06	0.000321226	8.64977e-05	4.30016e-05	0	0	0	0	0
CAND1	0.83678	0.864588	0.903554	0.725134	0	0	0	5.46724e-15	1	1	1	1	1
CAND2	0.303014	0.313002	0.269909	-0.00561509	0.00522385	0.00278743	0.0143227	0.968682	0	0	0	0	0
CANT1	-0.146459	-0.227108	-0.302536	-0.197493	0.20234	0.0343651	0.00559223	0.0911829	0	0	0	0	0
CANX	0.691588	0.764886	0.82782	0.77277	1.01755e-13	0	0	0	1	1	1	1	1
CAP1	0.794202	0.724367	0.743557	0.790962	0	0	0	0	1	1	1	1	1
CAP1P1	0.59922	0.571553	0.660447	0.154188	8.28796e-10	2.63059e-09	4.58726e-12	0.196543	1	1	1	0	0
CAP2	0.785388	0.851548	0.887631	0.255214	0	0	0	0.0251926	1	1	1	0	0
CAPG	0.265402	-0.183649	-0.200995	0.188288	0.015655	0.09152	0.0743134	0.108689	0	0	0	0	0
CAPN1	0.132805	0.285613	0.388939	-0.174134	0.250738	0.00678402	0.000256929	0.14037	0	0	0	0	0
CAPN10	-0.383875	-0.374824	-0.437015	-0.518802	0.000284075	0.000267157	3.05315e-05	5.17665e-07	0	0	0	-1	0
CAPN10-AS1	-0.539441	-0.518448	-0.589675	-0.208983	7.29291e-08	1.24692e-07	2.52703e-09	0.072389	-1	-1	-1	0	0
CAPN13	0.230489	0.194917	0.163306	0.342285	0.0378619	0.0721107	0.152576	0.00192621	0	0	0	0	0
CAPN15	-0.593325	-0.591073	-0.612071	-0.679338	1.34602e-09	5.29608e-10	4.05226e-10	1.12996e-12	-1	-1	-1	-1	-1
CAPN2	-0.180762	-0.513255	-0.648091	-0.0597391	0.109941	1.75828e-07	1.55834e-11	0.643507	0	-1	-1	0	0
CAPN3	0.36739	0.298697	0.296843	0.435385	0.000549044	0.00448489	0.00663875	4.52995e-05	0	0	0	0	0
CAPN5	-0.0723524	0.110548	0.158914	-0.207881	0.547348	0.323794	0.164604	0.0741076	0	0	0	0	0
CAPN7	0.45255	0.514623	0.369675	0.605364	1.22567e-05	1.60548e-07	0.000551867	1.13956e-09	0	1	0	1	0
CAPNS1	0.77063	0.820139	0.829644	0.732884	0	0	0	0	1	1	1	1	1
CAPRIN1	0.857525	0.855363	0.881976	0.861816	0	0	0	0	1	1	1	1	1
CAPRIN2	0.506411	0.387433	0.515098	-0.0385922	6.05526e-07	0.000155565	4.45989e-07	0.770383	1	0	1	0	0
CAPS	-0.255306	-0.575039	-0.581813	-0.232335	0.0204229	1.98873e-09	4.63948e-09	0.0435858	0	-1	-1	0	0
CAPS2	0.538765	0.652561	0.653464	0.178157	7.63591e-08	1.58499e-12	9.18928e-12	0.130793	1	1	1	0	0
CAPSL	-0.0874554	0.0161226	0.17604	0.145972	0.462298	0.892338	0.121446	0.22361	0	0	0	0	0
CAPZA1	0.70324	0.701727	0.704077	0.734587	2.56195e-14	5.50424e-15	3.68814e-14	0	1	1	1	1	1
CAPZA2	0.764134	0.750429	0.777388	0.551468	0	0	0	6.31172e-08	1	1	1	1	1
CAPZB	0.82703	0.755939	0.782487	0.717812	0	0	0	1.28612e-14	1	1	1	1	1
CARD16	-0.0356992	-0.135437	-0.211701	0.125168	0.773652	0.221768	0.0592304	0.303642	0	0	0	0	0
CARD6	-0.595912	-0.699145	-0.81082	-0.527146	1.08909e-09	6.8014e-15	0	3.07906e-07	-1	-1	-1	-1	-1
CARD8	-0.532183	-0.713679	-0.782063	-0.242717	1.18076e-07	1.44989e-15	0	0.0342033	-1	-1	-1	0	0
CARD8-AS1	-0.495366	-0.636805	-0.678006	-0.460233	1.16854e-06	7.93568e-12	7.28465e-13	1.35625e-05	0	-1	-1	0	0
CARF	0.442873	0.418448	0.231043	0.327776	1.99684e-05	3.73497e-05	0.038292	0.0031334	0	0	0	0	0
CARHSP1	-0.460649	-0.687039	-0.735202	-0.0957278	8.03144e-06	3.23575e-14	7.1499e-16	0.441848	0	-1	-1	0	0
CARKD	0.471765	0.499385	0.511035	0.28865	4.44521e-06	4.2891e-07	5.70654e-07	0.0103347	0	0	1	0	0
CARM1	-0.243264	-0.289567	-0.273533	-0.309316	0.0277786	0.00600285	0.0129695	0.00561402	0	0	0	0	0
CARNS1	0.18845	0.227811	0.161811	0.301233	0.0947334	0.0337593	0.156598	0.00717286	0	0	0	0	0
CARS	0.469919	0.737973	0.725906	0.545903	4.90963e-06	0	2.67958e-15	9.15546e-08	0	1	1	1	0
CARS2	-0.0427688	0.000818092	0.0245714	0.249602	0.728178	0.99507	0.84267	0.0289918	0	0	0	0	0
CARTPT	0.634828	0.424	0.688436	0.135042	3.65587e-11	2.85395e-05	2.28746e-13	0.263432	1	0	1	0	0
CASC1	0.294006	0.676146	0.657267	0.153184	0.00690008	1.16463e-13	6.3131e-12	0.199669	0	1	1	0	0
CASC10	-0.487453	-0.714657	-0.677012	-0.633613	1.84949e-06	1.44989e-15	8.12725e-13	1.00091e-10	0	-1	-1	-1	0
CASC2	0.217977	0.0966597	0.315456	-0.0229402	0.0505686	0.391744	0.00373057	0.866422	0	0	0	0	0
CASC3	-0.564359	-0.580226	-0.627199	-0.339191	1.25899e-08	1.30479e-09	1.08728e-10	0.00214231	-1	-1	-1	0	0
CASC4	0.233051	-0.0462326	-0.135955	0.102729	0.0356098	0.692733	0.238919	0.406739	0	0	0	0	0
CASC6	0.0368559	0.0741603	0.027771	0.0642232	0.76617	0.516543	0.822204	0.616201	0	0	0	0	0
CASD1	0.75934	0.840864	0.835815	0.697753	0	0	0	1.46661e-13	1	1	1	1	1
CASK	0.63142	0.689758	0.776752	0.490793	5.01778e-11	2.31362e-14	0	2.67515e-06	1	1	1	0	0
CASKIN1	-0.574185	-0.48828	-0.573957	-0.564752	6.03035e-09	8.52031e-07	8.37158e-09	2.4982e-08	-1	0	-1	-1	0
CASKIN2	-0.724434	-0.775326	-0.77751	-0.588547	2.48975e-15	0	0	4.33382e-09	-1	-1	-1	-1	-1
CASP1	-0.00426929	-0.160222	-0.368243	0.0828825	0.97457	0.144564	0.000583328	0.510638	0	0	0	0	0
CASP10	-0.616296	-0.741306	-0.731932	-0.386768	1.94154e-10	0	1.37341e-15	0.00036999	-1	-1	-1	0	0
CASP2	-0.631642	-0.594434	-0.536171	-0.226477	4.91553e-11	3.96746e-10	1.16931e-07	0.0497096	-1	-1	-1	0	0
CASP3	0.34668	0.376522	0.371498	0.48849	0.00119535	0.000248576	0.000514694	3.04005e-06	0	0	0	0	0
CASP4	-0.068101	-0.224923	-0.448348	-0.018344	0.572249	0.0362587	1.76011e-05	0.894092	0	0	0	0	0
CASP6	-0.324997	-0.525212	-0.484323	-0.0664459	0.00255684	7.92199e-08	2.6844e-06	0.604314	0	-1	0	0	0
CASP7	-0.277984	-0.405255	-0.460415	-0.19633	0.0110664	6.97358e-05	9.61246e-06	0.093266	0	0	0	0	0
CASP8	-0.366439	-0.221675	-0.295341	-0.31488	0.000570023	0.0392406	0.00694047	0.0047357	0	0	0	0	0
CASP8AP2	0.0271211	0.180415	0.0960493	-0.167544	0.828349	0.0977689	0.413996	0.157628	0	0	0	0	0
CASP9	-0.468236	-0.484107	-0.413567	-0.352364	5.37932e-06	1.09349e-06	8.96042e-05	0.00135133	0	0	0	0	0
CASQ1	0.251139	0.721666	0.806911	0.298468	0.0227368	0	0	0.00777235	0	1	1	0	0
CAST	0.1565	0.33872	0.372644	0.498516	0.170927	0.00111367	0.000492371	1.72984e-06	0	0	0	0	0
CAT	0.280628	-0.128119	-0.160514	0.445262	0.0102625	0.249363	0.160136	2.84857e-05	0	0	0	0	0
CATSPER2	-0.0507963	-0.133183	-0.132644	-0.227972	0.678163	0.230069	0.251039	0.0480678	0	0	0	0	0
CATSPER2P1	-0.239804	-0.306512	-0.2934	-0.331596	0.0302423	0.00346954	0.00734846	0.00276064	0	0	0	0	0
CAV1	-0.43888	-0.41781	-0.471172	0.0611751	2.43187e-05	3.85357e-05	5.48044e-06	0.63496	0	0	0	0	0
CAV2	-0.086529	-0.264934	-0.386175	0.0510143	0.467405	0.0125209	0.000287439	0.695357	0	0	0	0	0
CBFA2T2	-0.137986	-0.570882	-0.563725	-0.0324748	0.231538	2.77383e-09	1.76651e-08	0.808156	0	-1	-1	0	0
CBFA2T3	-0.655907	-0.713751	-0.682124	-0.62525	4.74209e-12	1.44989e-15	4.64075e-13	2.11492e-10	-1	-1	-1	-1	-1
CBFB	-0.16816	-0.386952	-0.402403	0.118169	0.139077	0.000158715	0.000146127	0.334275	0	0	0	0	0
CBL	-0.23953	-0.381246	-0.469036	-0.275228	0.0304373	0.000203304	6.13768e-06	0.0149702	0	0	0	0	0
CBLB	-0.0290326	0.0399566	-0.129649	0.116313	0.81606	0.733689	0.262385	0.342292	0	0	0	0	0
CBLL1	0.526359	0.500243	0.587405	0.630789	1.73065e-07	4.06242e-07	3.01334e-09	1.28334e-10	1	1	1	1	1
CBLN2	0.564197	0.748051	0.81704	0.118211	1.27396e-08	0	0	0.334097	1	1	1	0	0
CBLN4	0.551473	0.741825	0.808983	0.156069	3.19113e-08	0	0	0.190641	1	1	1	0	0
CBR1	0.509997	0.437825	0.483663	0.53965	4.86927e-07	1.42336e-05	2.7858e-06	1.37822e-07	1	0	0	1	0
CBR3	0.340264	0.322955	0.278689	0.0470764	0.0015064	0.00197472	0.0112221	0.718717	0	0	0	0	0
CBR3-AS1	0.234367	0.371699	0.41837	0.161982	0.034485	0.000304683	7.23488e-05	0.172954	0	0	0	0	0
CBR4	0.515148	0.540087	0.595376	0.600294	3.54139e-07	2.80434e-08	1.60404e-09	1.71375e-09	1	1	1	1	1
CBS	-0.0349833	-0.140502	-0.183601	-0.160359	0.778038	0.204078	0.105208	0.17767	0	0	0	0	0
CBWD1	0.644249	0.486707	0.511543	0.499815	1.49589e-11	9.36658e-07	5.53564e-07	1.6024e-06	1	0	1	0	0
CBWD2	0.635027	0.672916	0.665119	0.529822	3.59075e-11	1.69766e-13	2.84776e-12	2.6067e-07	1	1	1	1	1
CBWD3	0.405708	0.420063	0.387921	0.34018	0.000113049	3.45645e-05	0.000267891	0.00207321	0	0	0	0	0
CBWD5	0.743303	0.778054	0.750912	0.611638	0	0	0	6.79224e-10	1	1	1	1	1
CBWD6	0.400408	0.396245	0.528621	0.0642316	0.00014206	0.000105184	1.90191e-07	0.616176	0	0	1	0	0
CBX1	0.738936	0.706408	0.745981	0.644461	0	2.83245e-15	0	3.70697e-11	1	1	1	1	1
CBX1P1	0.470858	0.460986	0.452504	0.143953	4.67119e-06	4.12194e-06	1.43274e-05	0.230771	0	0	0	0	0
CBX1P2	-0.0286092	-0.079533	-0.0494671	0.235795	0.818877	0.485443	0.682609	0.0402551	0	0	0	0	0
CBX3	0.759568	0.816069	0.805299	0.717697	0	0	0	1.28612e-14	1	1	1	1	1
CBX3P3	-0.263046	-0.351363	-0.224869	-0.0486713	0.0166663	0.000688805	0.0441905	0.709205	0	0	0	0	0
CBX3P4	-0.226192	-0.108545	-0.0482753	-0.239781	0.0418692	0.333086	0.690042	0.0366879	0	0	0	0	0
CBX4	0.298283	0.230947	0.269083	0.344076	0.00604241	0.031201	0.0146525	0.00180965	0	0	0	0	0
CBX5	-0.00109534	0.398653	0.328404	0.118392	0.993293	9.43033e-05	0.00243796	0.333401	0	0	0	0	0
CBX5P1	-0.0276289	-0.254453	0.146701	0.277215	0.825274	0.0168085	0.201597	0.0142042	0	0	0	0	0
CBX6	-0.493646	-0.457534	-0.472933	-0.487466	1.29266e-06	4.98412e-06	4.98676e-06	3.2138e-06	0	0	0	0	0
CBX7	-0.503618	-0.364628	-0.391346	-0.474829	7.18568e-07	0.000406748	0.000232574	6.36732e-06	-1	0	0	0	0
CBY1	-0.0678482	-0.218475	0.107861	0.0576303	0.573793	0.0422952	0.356431	0.656236	0	0	0	0	0
CC2D1A	-0.428101	-0.449693	-0.508658	-0.543912	4.08149e-05	7.62547e-06	6.59162e-07	1.0448e-07	0	0	-1	-1	0
CC2D1B	-0.202578	-0.394841	-0.385955	-0.0247665	0.0709328	0.000112118	0.000289929	0.855815	0	0	0	0	0
CC2D2A	-0.273755	-0.6121	-0.597583	-0.451432	0.0124685	8.34053e-11	1.34494e-09	2.09942e-05	0	-1	-1	0	0
CCAR1	-0.115572	-0.255096	-0.303793	-0.0504958	0.321714	0.0165163	0.00538271	0.698603	0	0	0	0	0
CCAR2	0.644625	0.715818	0.714229	0.34523	1.44235e-11	7.56273e-16	1.07316e-14	0.00173786	1	1	1	0	0
CCBE1	0.385592	-0.262594	-0.156911	-0.388987	0.000265196	0.0133907	0.170402	0.000338788	0	0	0	0	0
CCBL1	0.147745	0.195544	0.201625	0.246016	0.198171	0.0711116	0.0733702	0.0316293	0	0	0	0	0
CCBL2	0.636583	0.579395	0.587344	0.507236	3.10106e-11	1.39643e-09	3.02685e-09	1.03596e-06	1	1	1	1	1
CCDC101	0.120053	-0.0783697	0.16669	0.194232	0.302591	0.49177	0.143794	0.0970883	0	0	0	0	0
CCDC102B	0.407195	0.450945	0.475084	0.192797	0.000105882	7.12988e-06	4.44163e-06	0.0998793	0	0	0	0	0
CCDC103	-0.164598	0.0776449	0.245353	-0.0440464	0.148268	0.495992	0.0270952	0.736523	0	0	0	0	0
CCDC106	0.150887	0.175991	0.219331	-0.228751	0.187987	0.106951	0.0501079	0.0472475	0	0	0	0	0
CCDC107	0.20353	0.0992598	0.0892011	0.120534	0.0694758	0.378651	0.450107	0.323943	0	0	0	0	0
CCDC109B	0.390634	0.331614	0.522408	0.466722	0.000215211	0.00144537	2.82221e-07	9.7596e-06	0	0	1	0	0
CCDC112	0.653059	0.5348	0.627268	0.553715	6.2754e-12	4.08268e-08	1.08053e-10	5.41744e-08	1	1	1	1	1
CCDC113	0.490467	0.589003	0.603611	0.148841	1.55312e-06	6.31144e-10	8.20683e-10	0.213876	0	1	1	0	0
CCDC115	0.708078	0.788108	0.825665	0.61816	1.45083e-14	0	0	3.90363e-10	1	1	1	1	1
CCDC117	-0.295855	-0.236228	-0.241636	-0.0513528	0.0065208	0.0273017	0.0297048	0.693262	0	0	0	0	0
CCDC12	0.563122	0.606828	0.560039	0.476832	1.37887e-08	1.34177e-10	2.29886e-08	5.71978e-06	1	1	1	0	0
CCDC120	-0.785317	-0.713019	-0.82341	-0.776842	0	1.44989e-15	0	0	-1	-1	-1	-1	-1
[truncated: 17,231 more rows]
