# Supplementary material for: Neuropathological and transcriptomic characteristics of the aged brain
Source: eLife. 2017 Nov 9;6:e31126. doi: 10.7554/eLife.31126 (PMC5679757; doi:10.7554/eLife.31126)
Supplement: Figure 6—source data 3. — Up to 50 significant categories for molecular function (MF), cellular component (CC), and biological process (BP) are shown, after correction for multiple comparisons. [file elife-31126-fig6-data3.xlsx]

## Sheet: SourceData3
Direction	Data set	Rank	ID	Name	pValue	FDR B&H	FDR B&Y	Bonferroni	Genes from Input	Genes in Annotation
Decreasing w/ low RIN	GO:MF	1	GO:0003723	RNA binding	1.237e-61	2.749e-58	2.277e-57	2.749e-58	389	1634
Decreasing w/ low RIN	GO:MF	2	GO:0044822	poly(A) RNA binding	3.449e-59	3.832e-56	3.175e-55	7.665e-56	312	1183
Decreasing w/ low RIN	GO:MF	3	GO:0043021	ribonucleoprotein complex binding	2.335e-19	1.729e-16	1.433e-15	5.188e-16	51	123
Decreasing w/ low RIN	GO:MF	4	GO:0003954	NADH dehydrogenase activity	6.941e-18	2.57e-15	2.129e-14	1.542e-14	29	46
Decreasing w/ low RIN	GO:MF	5	GO:0050136	NADH dehydrogenase (quinone) activity	6.941e-18	2.57e-15	2.129e-14	1.542e-14	29	46
Decreasing w/ low RIN	GO:MF	6	GO:0008137	NADH dehydrogenase (ubiquinone) activity	6.941e-18	2.57e-15	2.129e-14	1.542e-14	29	46
Decreasing w/ low RIN	GO:MF	7	GO:0016818	hydrolase activity, acting on acid anhydrides, in phosphorus-containing anhydrides	1.159e-15	3.602e-13	2.984e-12	2.576e-12	161	829
Decreasing w/ low RIN	GO:MF	8	GO:0016817	hydrolase activity, acting on acid anhydrides	1.297e-15	3.602e-13	2.984e-12	2.882e-12	161	830
Decreasing w/ low RIN	GO:MF	9	GO:0016462	pyrophosphatase activity	4.442e-15	1.097e-12	9.085e-12	9.871e-12	159	827
Decreasing w/ low RIN	GO:MF	10	GO:0016655	oxidoreductase activity, acting on NAD(P)H, quinone or similar compound as acceptor	1.24e-14	2.755e-12	2.283e-11	2.755e-11	30	60
Decreasing w/ low RIN	GO:MF	11	GO:0017111	nucleoside-triphosphatase activity	2.182e-14	4.408e-12	3.651e-11	4.848e-11	151	785
Decreasing w/ low RIN	GO:MF	12	GO:0003743	translation initiation factor activity	4.224e-14	7.822e-12	6.48e-11	9.387e-11	27	51
Decreasing w/ low RIN	GO:MF	13	GO:0016874	ligase activity	5.696e-14	9.736e-12	8.065e-11	1.266e-10	95	415
Decreasing w/ low RIN	GO:MF	14	GO:0008135	translation factor activity, RNA binding	1.664e-13	2.641e-11	2.188e-10	3.697e-10	36	90
Decreasing w/ low RIN	GO:MF	15	GO:0019787	ubiquitin-like protein transferase activity	4.058e-13	6.011e-11	4.979e-10	9.016e-10	97	441
Decreasing w/ low RIN	GO:MF	16	GO:0032549	ribonucleoside binding	1.222e-12	1.607e-10	1.331e-09	2.715e-09	282	1833
Decreasing w/ low RIN	GO:MF	17	GO:0035639	purine ribonucleoside triphosphate binding	1.229e-12	1.607e-10	1.331e-09	2.732e-09	280	1817
Decreasing w/ low RIN	GO:MF	18	GO:0001882	nucleoside binding	1.916e-12	2.365e-10	1.959e-09	4.258e-09	282	1840
Decreasing w/ low RIN	GO:MF	19	GO:0017076	purine nucleotide binding	3.312e-12	3.873e-10	3.208e-09	7.359e-09	286	1881
Decreasing w/ low RIN	GO:MF	20	GO:0032550	purine ribonucleoside binding	4.725e-12	5.25e-10	4.349e-09	1.05e-08	279	1830
Decreasing w/ low RIN	GO:MF	21	GO:0001883	purine nucleoside binding	5.703e-12	5.635e-10	4.668e-09	1.267e-08	279	1833
Decreasing w/ low RIN	GO:MF	22	GO:0004842	ubiquitin-protein transferase activity	5.735e-12	5.635e-10	4.668e-09	1.274e-08	90	414
Decreasing w/ low RIN	GO:MF	23	GO:0032553	ribonucleotide binding	5.833e-12	5.635e-10	4.668e-09	1.296e-08	285	1882
Decreasing w/ low RIN	GO:MF	24	GO:0032555	purine ribonucleotide binding	9.757e-12	9.034e-10	7.483e-09	2.168e-08	282	1866
Decreasing w/ low RIN	GO:MF	25	GO:0016651	oxidoreductase activity, acting on NAD(P)H	1.813e-11	1.612e-09	1.335e-08	4.029e-08	36	103
Decreasing w/ low RIN	GO:MF	26	GO:0015078	hydrogen ion transmembrane transporter activity	1.156e-10	9.875e-09	8.18e-08	2.568e-07	36	109
Decreasing w/ low RIN	GO:MF	27	GO:0042623	ATPase activity, coupled	1.324e-10	1.09e-08	9.027e-08	2.942e-07	74	332
Decreasing w/ low RIN	GO:MF	28	GO:0061659	ubiquitin-like protein ligase activity	6.573e-10	5.216e-08	4.321e-07	1.46e-06	54	217
Decreasing w/ low RIN	GO:MF	29	GO:0061630	ubiquitin protein ligase activity	7.9e-10	6.053e-08	5.014e-07	1.755e-06	53	212
Decreasing w/ low RIN	GO:MF	30	GO:0016887	ATPase activity	8.35e-10	6.184e-08	5.123e-07	1.855e-06	89	446
Decreasing w/ low RIN	GO:MF	31	GO:0070003	threonine-type peptidase activity	9.052e-10	6.285e-08	5.206e-07	2.011e-06	14	21
Decreasing w/ low RIN	GO:MF	32	GO:0004298	threonine-type endopeptidase activity	9.052e-10	6.285e-08	5.206e-07	2.011e-06	14	21
Decreasing w/ low RIN	GO:MF	33	GO:0003735	structural constituent of ribosome	1.619e-09	1.08e-07	8.947e-07	3.597e-06	53	216
Decreasing w/ low RIN	GO:MF	34	GO:0051082	unfolded protein binding	1.653e-09	1.08e-07	8.947e-07	3.672e-06	33	103
Decreasing w/ low RIN	GO:MF	35	GO:0008565	protein transporter activity	3.969e-09	2.52e-07	2.087e-06	8.82e-06	32	101
Decreasing w/ low RIN	GO:MF	36	GO:0019899	enzyme binding	4.314e-09	2.663e-07	2.206e-06	9.585e-06	277	1933
Decreasing w/ low RIN	GO:MF	37	GO:0005524	ATP binding	5.379e-08	3.154e-06	2.612e-05	0.0001195	216	1476
Decreasing w/ low RIN	GO:MF	38	GO:0005048	signal sequence binding	5.393e-08	3.154e-06	2.612e-05	0.0001198	18	42
Decreasing w/ low RIN	GO:MF	39	GO:0030554	adenyl nucleotide binding	7.265e-08	4.139e-06	3.429e-05	0.0001614	222	1531
Decreasing w/ low RIN	GO:MF	40	GO:0031625	ubiquitin protein ligase binding	7.818e-08	4.343e-06	3.598e-05	0.0001737	58	273
Decreasing w/ low RIN	GO:MF	41	GO:0016879	ligase activity, forming carbon-nitrogen bonds	1.014e-07	5.498e-06	4.554e-05	0.0002254	61	295
Decreasing w/ low RIN	GO:MF	42	GO:0004812	aminoacyl-tRNA ligase activity	1.281e-07	6.469e-06	5.359e-05	0.0002846	18	44
Decreasing w/ low RIN	GO:MF	43	GO:0016876	ligase activity, forming aminoacyl-tRNA and related compounds	1.281e-07	6.469e-06	5.359e-05	0.0002846	18	44
Decreasing w/ low RIN	GO:MF	44	GO:0016875	ligase activity, forming carbon-oxygen bonds	1.281e-07	6.469e-06	5.359e-05	0.0002846	18	44
Decreasing w/ low RIN	GO:MF	45	GO:0044389	ubiquitin-like protein ligase binding	1.326e-07	6.545e-06	5.422e-05	0.0002945	58	277
Decreasing w/ low RIN	GO:MF	46	GO:0032559	adenyl ribonucleotide binding	2.167e-07	1.047e-05	8.673e-05	0.0004816	218	1519
Decreasing w/ low RIN	GO:MF	47	GO:0016491	oxidoreductase activity	2.751e-07	1.301e-05	0.0001077	0.0006113	122	751
Decreasing w/ low RIN	GO:MF	48	GO:0009055	electron carrier activity	5.227e-07	2.42e-05	0.0002004	0.001161	31	116
Decreasing w/ low RIN	GO:MF	49	GO:0008139	nuclear localization sequence binding	6.715e-07	3.045e-05	0.0002523	0.001492	12	23
Decreasing w/ low RIN	GO:MF	50	GO:0036402	proteasome-activating ATPase activity	1.389e-06	6.174e-05	0.0005114	0.003087	6	6
Decreasing w/ low RIN	GO:BP	1	GO:0007005	mitochondrion organization	3.884e-46	2.831e-42	2.681e-41	2.831e-42	218	770
Decreasing w/ low RIN	GO:BP	2	GO:0006396	RNA processing	5.469e-37	1.993e-33	1.888e-32	3.986e-33	225	914
Decreasing w/ low RIN	GO:BP	3	GO:0034622	cellular macromolecular complex assembly	2.8e-34	6.802e-31	6.442e-30	2.041e-30	232	994
Decreasing w/ low RIN	GO:BP	4	GO:0006412	translation	2.154e-32	3.924e-29	3.717e-28	1.57e-28	175	667
Decreasing w/ low RIN	GO:BP	5	GO:0006414	translational elongation	6.171e-32	8.994e-29	8.519e-28	4.497e-28	68	134
Decreasing w/ low RIN	GO:BP	6	GO:0032543	mitochondrial translation	8.561e-32	1.04e-28	9.849e-28	6.239e-28	64	120
Decreasing w/ low RIN	GO:BP	7	GO:0065003	macromolecular complex assembly	3.33e-31	3.468e-28	3.284e-27	2.427e-27	346	1831
Decreasing w/ low RIN	GO:BP	8	GO:0043043	peptide biosynthetic process	6.164e-31	5.616e-28	5.319e-27	4.492e-27	177	696
Decreasing w/ low RIN	GO:BP	9	GO:0070125	mitochondrial translational elongation	4.552e-30	3.686e-27	3.491e-26	3.317e-26	52	85
Decreasing w/ low RIN	GO:BP	10	GO:0070647	protein modification by small protein conjugation or removal	1.797e-29	1.2e-26	1.137e-25	1.309e-25	226	1026
Decreasing w/ low RIN	GO:BP	11	GO:0043632	modification-dependent macromolecule catabolic process	1.811e-29	1.2e-26	1.137e-25	1.32e-25	159	606
Decreasing w/ low RIN	GO:BP	12	GO:0006511	ubiquitin-dependent protein catabolic process	2.523e-29	1.533e-26	1.451e-25	1.839e-25	156	590
Decreasing w/ low RIN	GO:BP	13	GO:0043604	amide biosynthetic process	3.738e-29	2.021e-26	1.914e-25	2.725e-25	187	780
Decreasing w/ low RIN	GO:BP	14	GO:0019941	modification-dependent protein catabolic process	3.882e-29	2.021e-26	1.914e-25	2.829e-25	157	598
Decreasing w/ low RIN	GO:BP	15	GO:0043603	cellular amide metabolic process	4.736e-29	2.301e-26	2.18e-25	3.452e-25	225	1026
Decreasing w/ low RIN	GO:BP	16	GO:1902582	single-organism intracellular transport	9.381e-29	4.273e-26	4.047e-25	6.837e-25	342	1854
Decreasing w/ low RIN	GO:BP	17	GO:0044257	cellular protein catabolic process	4.42e-28	1.895e-25	1.795e-24	3.221e-24	171	695
Decreasing w/ low RIN	GO:BP	18	GO:0051603	proteolysis involved in cellular protein catabolic process	8.599e-28	3.482e-25	3.298e-24	6.267e-24	165	662
Decreasing w/ low RIN	GO:BP	19	GO:0006415	translational termination	1.117e-27	3.846e-25	3.643e-24	8.139e-24	54	99
Decreasing w/ low RIN	GO:BP	20	GO:0009167	purine ribonucleoside monophosphate metabolic process	1.121e-27	3.846e-25	3.643e-24	8.17e-24	96	279
Decreasing w/ low RIN	GO:BP	21	GO:0032446	protein modification by small protein conjugation	1.124e-27	3.846e-25	3.643e-24	8.188e-24	203	903
Decreasing w/ low RIN	GO:BP	22	GO:0009123	nucleoside monophosphate metabolic process	1.161e-27	3.846e-25	3.643e-24	8.461e-24	101	304
Decreasing w/ low RIN	GO:BP	23	GO:0009126	purine nucleoside monophosphate metabolic process	1.537e-27	4.871e-25	4.614e-24	1.12e-23	96	280
Decreasing w/ low RIN	GO:BP	24	GO:0046128	purine ribonucleoside metabolic process	1.636e-27	4.968e-25	4.706e-24	1.192e-23	112	362
Decreasing w/ low RIN	GO:BP	25	GO:0006518	peptide metabolic process	1.832e-27	5.341e-25	5.059e-24	1.335e-23	194	848
Decreasing w/ low RIN	GO:BP	26	GO:0042278	purine nucleoside metabolic process	3.613e-27	1.013e-24	9.591e-24	2.633e-23	112	365
Decreasing w/ low RIN	GO:BP	27	GO:0022613	ribonucleoprotein complex biogenesis	9.643e-27	2.554e-24	2.419e-23	7.028e-23	130	468
Decreasing w/ low RIN	GO:BP	28	GO:0009161	ribonucleoside monophosphate metabolic process	9.811e-27	2.554e-24	2.419e-23	7.15e-23	97	291
Decreasing w/ low RIN	GO:BP	29	GO:0044265	cellular macromolecule catabolic process	1.165e-26	2.927e-24	2.772e-23	8.489e-23	212	978
Decreasing w/ low RIN	GO:BP	30	GO:0042775	mitochondrial ATP synthesis coupled electron transport	1.253e-26	3.044e-24	2.883e-23	9.131e-23	48	82
Decreasing w/ low RIN	GO:BP	31	GO:0070126	mitochondrial translational termination	2.071e-26	4.869e-24	4.611e-23	1.509e-22	49	86
Decreasing w/ low RIN	GO:BP	32	GO:0006397	mRNA processing	3.815e-26	8.688e-24	8.229e-23	2.78e-22	131	480
Decreasing w/ low RIN	GO:BP	33	GO:0042773	ATP synthesis coupled electron transport	1.164e-25	2.57e-23	2.434e-22	8.48e-22	48	85
Decreasing w/ low RIN	GO:BP	34	GO:0000375	RNA splicing, via transesterification reactions	1.263e-25	2.707e-23	2.564e-22	9.205e-22	99	310
Decreasing w/ low RIN	GO:BP	35	GO:1901657	glycosyl compound metabolic process	1.839e-25	3.83e-23	3.627e-22	1.34e-21	122	436
Decreasing w/ low RIN	GO:BP	36	GO:0009116	nucleoside metabolic process	2.021e-25	4.092e-23	3.876e-22	1.473e-21	118	414
Decreasing w/ low RIN	GO:BP	37	GO:0009119	ribonucleoside metabolic process	2.087e-25	4.11e-23	3.893e-22	1.521e-21	114	392
Decreasing w/ low RIN	GO:BP	38	GO:0051437	positive regulation of ubiquitin-protein ligase activity involved in regulation of mitotic cell cycle transition	2.424e-25	4.649e-23	4.403e-22	1.767e-21	45	76
Decreasing w/ low RIN	GO:BP	39	GO:0043161	proteasome-mediated ubiquitin-dependent protein catabolic process	2.65e-25	4.951e-23	4.69e-22	1.931e-21	114	393
Decreasing w/ low RIN	GO:BP	40	GO:0033108	mitochondrial respiratory chain complex assembly	5.253e-25	9.572e-23	9.065e-22	3.829e-21	45	77
Decreasing w/ low RIN	GO:BP	41	GO:0009141	nucleoside triphosphate metabolic process	6.137e-25	1.091e-22	1.033e-21	4.473e-21	95	295
Decreasing w/ low RIN	GO:BP	42	GO:0000377	RNA splicing, via transesterification reactions with bulged adenosine as nucleophile	7.407e-25	1.253e-22	1.187e-21	5.398e-21	97	306
Decreasing w/ low RIN	GO:BP	43	GO:0000398	mRNA splicing, via spliceosome	7.407e-25	1.253e-22	1.187e-21	5.398e-21	97	306
Decreasing w/ low RIN	GO:BP	44	GO:0008380	RNA splicing	7.567e-25	1.253e-22	1.187e-21	5.515e-21	115	403
Decreasing w/ low RIN	GO:BP	45	GO:0051436	negative regulation of ubiquitin-protein ligase activity involved in mitotic cell cycle	7.742e-25	1.254e-22	1.188e-21	5.642e-21	43	71
Decreasing w/ low RIN	GO:BP	46	GO:1904668	positive regulation of ubiquitin protein ligase activity	8.614e-25	1.365e-22	1.293e-21	6.278e-21	46	81
Decreasing w/ low RIN	GO:BP	47	GO:0009144	purine nucleoside triphosphate metabolic process	9.285e-25	1.44e-22	1.364e-21	6.767e-21	90	271
Decreasing w/ low RIN	GO:BP	48	GO:0046034	ATP metabolic process	1.17e-24	1.776e-22	1.682e-21	8.525e-21	84	242
Decreasing w/ low RIN	GO:BP	49	GO:0009205	purine ribonucleoside triphosphate metabolic process	1.712e-24	2.523e-22	2.39e-21	1.247e-20	88	263
Decreasing w/ low RIN	GO:BP	50	GO:0051439	regulation of ubiquitin-protein ligase activity involved in mitotic cell cycle	1.731e-24	2.523e-22	2.39e-21	1.262e-20	43	72
Decreasing w/ low RIN	GO:CC	1	GO:0005739	mitochondrion	1.251e-75	1.313e-72	9.888e-72	1.313e-72	435	1777
Decreasing w/ low RIN	GO:CC	2	GO:0044429	mitochondrial part	1.369e-71	7.18e-69	5.409e-68	1.436e-68	297	988
Decreasing w/ low RIN	GO:CC	3	GO:0031967	organelle envelope	9.448e-66	3.304e-63	2.489e-62	9.911e-63	319	1170
Decreasing w/ low RIN	GO:CC	4	GO:0031975	envelope	2.872e-65	7.532e-63	5.674e-62	3.013e-62	319	1175
Decreasing w/ low RIN	GO:CC	5	GO:0005740	mitochondrial envelope	2.051e-63	4.303e-61	3.242e-60	2.152e-60	238	737
Decreasing w/ low RIN	GO:CC	6	GO:0031966	mitochondrial membrane	2.032e-59	3.552e-57	2.676e-56	2.131e-56	224	695
Decreasing w/ low RIN	GO:CC	7	GO:0005743	mitochondrial inner membrane	5.502e-59	8.245e-57	6.211e-56	5.772e-56	186	507
Decreasing w/ low RIN	GO:CC	8	GO:0019866	organelle inner membrane	2.807e-54	3.681e-52	2.773e-51	2.945e-51	191	564
Decreasing w/ low RIN	GO:CC	9	GO:0030529	intracellular ribonucleoprotein complex	1.437e-48	1.507e-46	1.135e-45	1.507e-45	217	751
Decreasing w/ low RIN	GO:CC	10	GO:1990904	ribonucleoprotein complex	1.437e-48	1.507e-46	1.135e-45	1.507e-45	217	751
Decreasing w/ low RIN	GO:CC	11	GO:0044455	mitochondrial membrane part	3.086e-45	2.943e-43	2.217e-42	3.238e-42	96	189
Decreasing w/ low RIN	GO:CC	12	GO:1902494	catalytic complex	1.156e-43	1.01e-41	7.612e-41	1.212e-40	263	1080
Decreasing w/ low RIN	GO:CC	13	GO:0098798	mitochondrial protein complex	5.543e-42	4.473e-40	3.37e-39	5.815e-39	82	150
Decreasing w/ low RIN	GO:CC	14	GO:0098800	inner mitochondrial membrane protein complex	5.32e-41	3.986e-39	3.003e-38	5.581e-38	70	113
Decreasing w/ low RIN	GO:CC	15	GO:0005759	mitochondrial matrix	6.908e-32	4.831e-30	3.64e-29	7.247e-29	130	425
Decreasing w/ low RIN	GO:CC	16	GO:1990234	transferase complex	1.888e-30	1.238e-28	9.325e-28	1.981e-27	179	724
Decreasing w/ low RIN	GO:CC	17	GO:0005746	mitochondrial respiratory chain	4.202e-27	2.593e-25	1.953e-24	4.408e-24	46	75
Decreasing w/ low RIN	GO:CC	18	GO:0005730	nucleolus	1.123e-25	6.545e-24	4.931e-23	1.178e-22	195	894
Decreasing w/ low RIN	GO:CC	19	GO:0044451	nucleoplasm part	1.241e-25	6.852e-24	5.162e-23	1.302e-22	171	738
Decreasing w/ low RIN	GO:CC	20	GO:0070469	respiratory chain	1.745e-25	9.152e-24	6.894e-23	1.83e-22	49	90
Decreasing w/ low RIN	GO:CC	21	GO:0098803	respiratory chain complex	4.899e-25	2.447e-23	1.844e-22	5.139e-22	42	68
Decreasing w/ low RIN	GO:CC	22	GO:0000502	proteasome complex	7.104e-24	3.387e-22	2.552e-21	7.452e-21	44	78
Decreasing w/ low RIN	GO:CC	23	GO:0030964	NADH dehydrogenase complex	6.943e-22	2.913e-20	2.195e-19	7.283e-19	31	43
Decreasing w/ low RIN	GO:CC	24	GO:0045271	respiratory chain complex I	6.943e-22	2.913e-20	2.195e-19	7.283e-19	31	43
Decreasing w/ low RIN	GO:CC	25	GO:0005747	mitochondrial respiratory chain complex I	6.943e-22	2.913e-20	2.195e-19	7.283e-19	31	43
Decreasing w/ low RIN	GO:CC	26	GO:1990204	oxidoreductase complex	2.01e-21	8.109e-20	6.108e-19	2.108e-18	47	98
Decreasing w/ low RIN	GO:CC	27	GO:0005681	spliceosomal complex	4.129e-21	1.604e-19	1.209e-18	4.332e-18	64	173
Decreasing w/ low RIN	GO:CC	28	GO:0000313	organellar ribosome	1.662e-20	6.013e-19	4.53e-18	1.744e-17	41	79
Decreasing w/ low RIN	GO:CC	29	GO:0005761	mitochondrial ribosome	1.662e-20	6.013e-19	4.53e-18	1.744e-17	41	79
Decreasing w/ low RIN	GO:CC	30	GO:0071013	catalytic step 2 spliceosome	1.227e-19	4.292e-18	3.233e-17	1.288e-16	43	90
Decreasing w/ low RIN	GO:CC	31	GO:0098796	membrane protein complex	7.404e-19	2.505e-17	1.887e-16	7.766e-16	201	1060
Decreasing w/ low RIN	GO:CC	32	GO:0005840	ribosome	7.269e-16	2.383e-14	1.795e-13	7.625e-13	68	235
Decreasing w/ low RIN	GO:CC	33	GO:0043209	myelin sheath	1.084e-15	3.446e-14	2.596e-13	1.137e-12	62	204
Decreasing w/ low RIN	GO:CC	34	GO:0005838	proteasome regulatory particle	1.338e-15	4.129e-14	3.11e-13	1.404e-12	18	21
Decreasing w/ low RIN	GO:CC	35	GO:0016604	nuclear body	5.168e-15	1.549e-13	1.167e-12	5.421e-12	89	368
Decreasing w/ low RIN	GO:CC	36	GO:0022624	proteasome accessory complex	1.001e-13	2.917e-12	2.197e-11	1.05e-10	18	24
Decreasing w/ low RIN	GO:CC	37	GO:0005753	mitochondrial proton-transporting ATP synthase complex	1.634e-12	4.633e-11	3.49e-10	1.714e-09	16	21
Decreasing w/ low RIN	GO:CC	38	GO:0016469	proton-transporting two-sector ATPase complex	4.087e-12	1.128e-10	8.5e-10	4.287e-09	24	48
Decreasing w/ low RIN	GO:CC	39	GO:0042175	nuclear outer membrane-endoplasmic reticulum membrane network	4.853e-12	1.305e-10	9.833e-10	5.09e-09	173	1015
Decreasing w/ low RIN	GO:CC	40	GO:0005763	mitochondrial small ribosomal subunit	6.524e-12	1.669e-10	1.257e-09	6.844e-09	18	28
Decreasing w/ low RIN	GO:CC	41	GO:0000314	organellar small ribosomal subunit	6.524e-12	1.669e-10	1.257e-09	6.844e-09	18	28
Decreasing w/ low RIN	GO:CC	42	GO:0030532	small nuclear ribonucleoprotein complex	1.177e-11	2.94e-10	2.215e-09	1.235e-08	27	62
Decreasing w/ low RIN	GO:CC	43	GO:0045259	proton-transporting ATP synthase complex	1.612e-11	3.932e-10	2.962e-09	1.691e-08	16	23
Decreasing w/ low RIN	GO:CC	44	GO:0005789	endoplasmic reticulum membrane	2.033e-11	4.847e-10	3.651e-09	2.133e-08	168	994
Decreasing w/ low RIN	GO:CC	45	GO:0000151	ubiquitin ligase complex	2.117e-11	4.934e-10	3.717e-09	2.22e-08	66	274
Decreasing w/ low RIN	GO:CC	46	GO:0016607	nuclear speck	6.907e-11	1.575e-09	1.186e-08	7.245e-08	53	202
Decreasing w/ low RIN	GO:CC	47	GO:0005774	vacuolar membrane	8.491e-11	1.895e-09	1.428e-08	8.907e-08	112	594
Decreasing w/ low RIN	GO:CC	48	GO:0097525	spliceosomal snRNP complex	9.664e-11	2.112e-09	1.591e-08	1.014e-07	24	54
Decreasing w/ low RIN	GO:CC	49	GO:0044391	ribosomal subunit	1.031e-10	2.207e-09	1.663e-08	1.081e-07	48	175
Decreasing w/ low RIN	GO:CC	50	GO:0005839	proteasome core complex	2.75e-10	5.769e-09	4.346e-08	2.884e-07	14	20
Increasing w/ low RIN	GO:MF	1	GO:0008013	beta-catenin binding	1.796e-10	2.188e-07	1.681e-06	2.188e-07	19	89
Increasing w/ low RIN	GO:MF	2	GO:0044212	transcription regulatory region DNA binding	3.862e-09	1.545e-06	1.187e-05	4.704e-06	65	862
Increasing w/ low RIN	GO:MF	3	GO:0000975	regulatory region DNA binding	4.429e-09	1.545e-06	1.187e-05	5.394e-06	65	865
Increasing w/ low RIN	GO:MF	4	GO:0001067	regulatory region nucleic acid binding	5.074e-09	1.545e-06	1.187e-05	6.181e-06	65	868
Increasing w/ low RIN	GO:MF	5	GO:0043565	sequence-specific DNA binding	7.224e-09	1.76e-06	1.352e-05	8.799e-06	76	1097
Increasing w/ low RIN	GO:MF	6	GO:0001071	nucleic acid binding transcription factor activity	3.708e-08	6.451e-06	4.956e-05	4.516e-05	82	1267
Increasing w/ low RIN	GO:MF	7	GO:0003700	transcription factor activity, sequence-specific DNA binding	3.708e-08	6.451e-06	4.956e-05	4.516e-05	82	1267
Increasing w/ low RIN	GO:MF	8	GO:0000989	transcription factor activity, transcription factor binding	1.462e-07	2.225e-05	0.000171	0.000178	48	612
Increasing w/ low RIN	GO:MF	9	GO:0000988	transcription factor activity, protein binding	1.775e-07	2.402e-05	0.0001845	0.0002162	48	616
Increasing w/ low RIN	GO:MF	10	GO:0000976	transcription regulatory region sequence-specific DNA binding	7.076e-07	8.618e-05	0.0006621	0.0008618	51	705
Increasing w/ low RIN	GO:MF	11	GO:0003682	chromatin binding	8.665e-07	9.595e-05	0.0007371	0.001055	41	516
Increasing w/ low RIN	GO:MF	12	GO:1990837	sequence-specific double-stranded DNA binding	1.115e-06	0.0001132	0.0008694	0.001358	52	736
Increasing w/ low RIN	GO:MF	13	GO:0003712	transcription cofactor activity	1.536e-06	0.0001439	0.001106	0.001871	43	566
Increasing w/ low RIN	GO:MF	14	GO:0003713	transcription coactivator activity	4.75e-06	0.0004132	0.003175	0.005785	28	311
Increasing w/ low RIN	GO:MF	15	GO:0003690	double-stranded DNA binding	6.488e-06	0.0005268	0.004047	0.007902	54	824
Increasing w/ low RIN	GO:MF	16	GO:0001012	RNA polymerase II regulatory region DNA binding	1.387e-05	0.001056	0.008114	0.0169	44	638
Increasing w/ low RIN	GO:MF	17	GO:0000977	RNA polymerase II regulatory region sequence-specific DNA binding	2.401e-05	0.00172	0.01322	0.02925	43	632
Increasing w/ low RIN	GO:MF	18	GO:0000981	RNA polymerase II transcription factor activity, sequence-specific DNA binding	5.931e-05	0.004014	0.03083	0.07224	44	678
Increasing w/ low RIN	GO:MF	19	GO:0018024	histone-lysine N-methyltransferase activity	0.0001688	0.01082	0.08314	0.2056	8	46
Increasing w/ low RIN	GO:MF	20	GO:0044877	macromolecular complex binding	0.0002215	0.01349	0.1036	0.2698	84	1641
Increasing w/ low RIN	GO:MF	21	GO:0017124	SH3 domain binding	0.0003633	0.02107	0.1619	0.4425	13	123
Increasing w/ low RIN	GO:MF	22	GO:0005085	guanyl-nucleotide exchange factor activity	0.0004824	0.02671	0.2052	0.5876	23	306
Increasing w/ low RIN	GO:MF	23	GO:0005088	Ras guanyl-nucleotide exchange factor activity	0.0005191	0.02749	0.2112	0.6323	19	232
Increasing w/ low RIN	GO:MF	24	GO:0042054	histone methyltransferase activity	0.0009644	0.04894	0.376	1	8	59
Increasing w/ low RIN	GO:BP	1	GO:0072359	circulatory system development	8.604e-12	2.379e-08	2.187e-07	4.757e-08	82	1062
Increasing w/ low RIN	GO:BP	2	GO:0072358	cardiovascular system development	8.604e-12	2.379e-08	2.187e-07	4.757e-08	82	1062
Increasing w/ low RIN	GO:BP	3	GO:0006357	regulation of transcription from RNA polymerase II promoter	1.089e-09	1.573e-06	1.447e-05	6.02e-06	117	1922
Increasing w/ low RIN	GO:BP	4	GO:0051172	negative regulation of nitrogen compound metabolic process	1.469e-09	1.573e-06	1.447e-05	8.12e-06	104	1645
Increasing w/ low RIN	GO:BP	5	GO:0051253	negative regulation of RNA metabolic process	1.664e-09	1.573e-06	1.447e-05	9.199e-06	91	1370
Increasing w/ low RIN	GO:BP	6	GO:0009790	embryo development	1.98e-09	1.573e-06	1.447e-05	1.095e-05	80	1146
Increasing w/ low RIN	GO:BP	7	GO:0010629	negative regulation of gene expression	2.169e-09	1.573e-06	1.447e-05	1.199e-05	103	1635
Increasing w/ low RIN	GO:BP	8	GO:0001944	vasculature development	2.276e-09	1.573e-06	1.447e-05	1.259e-05	56	680
Increasing w/ low RIN	GO:BP	9	GO:1902679	negative regulation of RNA biosynthetic process	2.899e-09	1.781e-06	1.638e-05	1.603e-05	88	1322
Increasing w/ low RIN	GO:BP	10	GO:0000122	negative regulation of transcription from RNA polymerase II promoter	5.198e-09	2.874e-06	2.643e-05	2.874e-05	62	810
Increasing w/ low RIN	GO:BP	11	GO:0045934	negative regulation of nucleobase-containing compound metabolic process	5.865e-09	2.948e-06	2.711e-05	3.243e-05	96	1513
Increasing w/ low RIN	GO:BP	12	GO:0010558	negative regulation of macromolecule biosynthetic process	8.235e-09	3.794e-06	3.489e-05	4.553e-05	97	1545
Increasing w/ low RIN	GO:BP	13	GO:0001568	blood vessel development	1.026e-08	4.363e-06	4.012e-05	5.672e-05	53	653
Increasing w/ low RIN	GO:BP	14	GO:1903507	negative regulation of nucleic acid-templated transcription	1.637e-08	5.776e-06	5.311e-05	9.052e-05	85	1307
Increasing w/ low RIN	GO:BP	15	GO:0045892	negative regulation of transcription, DNA-templated	1.663e-08	5.776e-06	5.311e-05	9.196e-05	83	1265
Increasing w/ low RIN	GO:BP	16	GO:0031327	negative regulation of cellular biosynthetic process	1.671e-08	5.776e-06	5.311e-05	9.241e-05	99	1611
Increasing w/ low RIN	GO:BP	17	GO:0009890	negative regulation of biosynthetic process	2.201e-08	7.159e-06	6.583e-05	0.0001217	100	1642
Increasing w/ low RIN	GO:BP	18	GO:0048598	embryonic morphogenesis	2.534e-08	7.785e-06	7.158e-05	0.0001401	52	652
Increasing w/ low RIN	GO:BP	19	GO:2000113	negative regulation of cellular macromolecule biosynthetic process	3.176e-08	9.241e-06	8.497e-05	0.0001756	91	1456
Increasing w/ low RIN	GO:BP	20	GO:0035239	tube morphogenesis	7.163e-08	1.98e-05	0.0001821	0.000396	38	417
Increasing w/ low RIN	GO:BP	21	GO:0035295	tube development	7.702e-08	2.028e-05	0.0001865	0.0004259	53	694
Increasing w/ low RIN	GO:BP	22	GO:0043009	chordate embryonic development	9.272e-08	2.18e-05	0.0002005	0.0005127	53	698
Increasing w/ low RIN	GO:BP	23	GO:0045893	positive regulation of transcription, DNA-templated	9.463e-08	2.18e-05	0.0002005	0.0005232	93	1535
Increasing w/ low RIN	GO:BP	24	GO:1903508	positive regulation of nucleic acid-templated transcription	9.463e-08	2.18e-05	0.0002005	0.0005232	93	1535
Increasing w/ low RIN	GO:BP	25	GO:0009792	embryo development ending in birth or egg hatching	1.398e-07	3.091e-05	0.0002842	0.0007728	53	707
Increasing w/ low RIN	GO:BP	26	GO:1902680	positive regulation of RNA biosynthetic process	1.616e-07	3.437e-05	0.000316	0.0008936	93	1553
Increasing w/ low RIN	GO:BP	27	GO:0048646	anatomical structure formation involved in morphogenesis	2.583e-07	5.29e-05	0.0004864	0.001428	81	1304
Increasing w/ low RIN	GO:BP	28	GO:0001701	in utero embryonic development	2.98e-07	5.885e-05	0.0005411	0.001648	37	423
Increasing w/ low RIN	GO:BP	29	GO:0048514	blood vessel morphogenesis	3.16e-07	6.024e-05	0.0005539	0.001747	44	552
Increasing w/ low RIN	GO:BP	30	GO:0051254	positive regulation of RNA metabolic process	6.304e-07	0.0001162	0.001068	0.003485	93	1601
Increasing w/ low RIN	GO:BP	31	GO:0045944	positive regulation of transcription from RNA polymerase II promoter	7.392e-07	0.0001318	0.001212	0.004087	70	1099
Increasing w/ low RIN	GO:BP	32	GO:0000902	cell morphogenesis	8.022e-07	0.0001386	0.001275	0.004435	81	1341
Increasing w/ low RIN	GO:BP	33	GO:0016477	cell migration	9.347e-07	0.0001566	0.00144	0.005168	79	1302
Increasing w/ low RIN	GO:BP	34	GO:0010628	positive regulation of gene expression	1.18e-06	0.0001865	0.001715	0.006524	105	1901
Increasing w/ low RIN	GO:BP	35	GO:0010557	positive regulation of macromolecule biosynthetic process	1.181e-06	0.0001865	0.001715	0.006529	100	1785
Increasing w/ low RIN	GO:BP	36	GO:0034330	cell junction organization	1.311e-06	0.0002014	0.001852	0.007251	26	258
Increasing w/ low RIN	GO:BP	37	GO:0032989	cellular component morphogenesis	1.7e-06	0.000254	0.002335	0.009397	84	1434
Increasing w/ low RIN	GO:BP	38	GO:0031328	positive regulation of cellular biosynthetic process	2.311e-06	0.0003363	0.003092	0.01278	105	1929
Increasing w/ low RIN	GO:BP	39	GO:0001525	angiogenesis	2.895e-06	0.0004028	0.003704	0.01601	37	465
Increasing w/ low RIN	GO:BP	40	GO:0000904	cell morphogenesis involved in differentiation	2.914e-06	0.0004028	0.003704	0.01611	56	843
Increasing w/ low RIN	GO:BP	41	GO:0060562	epithelial tube morphogenesis	3.196e-06	0.000426	0.003917	0.01767	32	375
Increasing w/ low RIN	GO:BP	42	GO:0009891	positive regulation of biosynthetic process	3.236e-06	0.000426	0.003917	0.01789	106	1967
Increasing w/ low RIN	GO:BP	43	GO:0060429	epithelium development	3.912e-06	0.0005031	0.004626	0.02163	77	1307
Increasing w/ low RIN	GO:BP	44	GO:0022603	regulation of anatomical structure morphogenesis	4.034e-06	0.0005069	0.004661	0.0223	69	1131
Increasing w/ low RIN	GO:BP	45	GO:0045935	positive regulation of nucleobase-containing compound metabolic process	4.496e-06	0.0005524	0.005079	0.02486	100	1840
Increasing w/ low RIN	GO:BP	46	GO:2000026	regulation of multicellular organismal development	6.194e-06	0.0007445	0.006846	0.03425	102	1901
Increasing w/ low RIN	GO:BP	47	GO:0035107	appendage morphogenesis	6.639e-06	0.0007574	0.006965	0.0367	19	168
Increasing w/ low RIN	GO:BP	48	GO:0035108	limb morphogenesis	6.639e-06	0.0007574	0.006965	0.0367	19	168
Increasing w/ low RIN	GO:BP	49	GO:0040011	locomotion	6.713e-06	0.0007574	0.006965	0.03711	95	1740
Increasing w/ low RIN	GO:BP	50	GO:0048870	cell motility	1.011e-05	0.001097	0.01008	0.05592	81	1433
Increasing w/ low RIN	GO:CC	1	GO:0030054	cell junction	1.554e-06	0.0009325	0.006504	0.0009325	73	1202
Increasing w/ low RIN	GO:CC	2	GO:0000118	histone deacetylase complex	5.372e-05	0.008114	0.0566	0.03223	10	63
Increasing w/ low RIN	GO:CC	3	GO:0070161	anchoring junction	6.893e-05	0.008114	0.0566	0.04136	35	503
Increasing w/ low RIN	GO:CC	4	GO:0005912	adherens junction	7.248e-05	0.008114	0.0566	0.04349	34	484
Increasing w/ low RIN	GO:CC	5	GO:0044451	nucleoplasm part	7.897e-05	0.008114	0.0566	0.04738	46	738
Increasing w/ low RIN	GO:CC	6	GO:0016604	nuclear body	8.114e-05	0.008114	0.0566	0.04868	28	368
Increasing w/ low RIN	GO:CC	7	GO:0016607	nuclear speck	0.0002256	0.01934	0.1349	0.1353	18	202
Increasing w/ low RIN	GO:CC	8	GO:0031253	cell projection membrane	0.0006389	0.04792	0.3342	24	24	336
