# Supplementary material for: Neuropathological and transcriptomic characteristics of the aged brain
Source: eLife. 2017 Nov 9;6:e31126. doi: 10.7554/eLife.31126 (PMC5679757; doi:10.7554/eLife.31126)
Supplement: Figure 6—source data 4. [file elife-31126-fig6-data4.xlsx]

## Sheet: SourceData4
Name	Study	Brain Region	Method	Direction	Gene Count	Sample Count	Comp. Region	How was gene list generated?	Treatment for RNA quality
Satoh2014_Alzheimers:downAD in brain	Satoh et al 2014	FC	RNA-Seq	Down	445	7|8	TCx	Supplementary Table 1	Not reported
Satoh2014_Alzheimers:upAD in brain	Satoh et al 2014	FC	RNA-Seq	Up	43	7|8	TCx	Supplementary Table 1	Not reported
Allen2016_Alzheimers: downAD in TCx	Allen et al 2016	TCx	RNA-Seq	Down	748	80|84	TCx	Table on AMP-AD (syn6090802), simple covariates (q<0.01, beta>0.5)	Model includes covariates for age, gender, RIN, tissue source, and flowcell
Allen2016_Alzheimers: upAD in TCx	Allen et al 2016	TCx	RNA-Seq	Up	1087	80|84	TCx	Table on AMP-AD (syn6090802), simple covariates (q<0.01, beta>0.5)	Model includes covariates for age, gender, RIN, tissue source, and flowcell
Webster_Alzheimers: downAD in FC	Webster et al 2009	FC	Microarray	Down	367	31|37	TCx	T-test, q<0.000001 in GSE15222	Matched PMI between AD and control; RIN not reported
Webster_Alzheimers: upAD in FC	Webster et al 2009	FC	Microarray	Up	247	31|37	TCx	T-test, q<0.000001 in GSE15222	Matched PMI between AD and control; RIN not reported
Miller_Alzheimers: downAD in CA1	Miller et al 2013	CA1	Microarray	Down	344	16|16	HIP	Table S2	Matched PMI between AD and control; RIN not reported
Miller_Alzheimers: upAD in CA1	Miller et al 2013	CA1	Microarray	Up	512	16|16	HIP	Table S2	Matched PMI between AD and control; RIN not reported
Colangelo_Alzheimers:downAD in CA1	Colangelo et al 2002	CA1	Microarray	Down	11	6|6	HIP	Table II	No difference in pH between AD and control
Colangelo_Alzheimers:upAD in CA1	Colangelo et al 2002	CA1	Microarray	Up	16	6|6	HIP	Table II	No difference in pH between AD and control
DownWithAlzheimers_Blalock__ADvsCT_inCA1	Blalock et al 2004	CA1	Microarray	Down	1295	8|21	HIP	"userListEnrichment" R function	Low PMI across donors; RIN not reported
UpWithAlzheimers_Blalock__ADvsCT_inCA1	Blalock et al 2004	CA1	Microarray	Up	872	8|21	HIP	"userListEnrichment" R function	Low PMI across donors; RIN not reported
Zhang_Alzheimers: Neg. cor. w/ Braak stage in PFC	Zhang et al 2013	PFC	Microarray	Down	1398	101|129	TCx	Table S1, "Braak stage correlation", R < -0.50	RIN corrected
Zhang_Alzheimers: Pos. cor. w/ Braak stage in PFC	Zhang et al 2013	PFC	Microarray	Up	1020	101|129	TCx	Table S1, "Braak stage correlation", R > 0.50	RIN corrected
Webster_Alzheimers: downAD in TC	Webster et al 2009	TC	Microarray	Down	1271	130|102	TCx	T-test, q<0.000001 in GSE15222	Matched PMI between AD and control; RIN not reported
Webster_Alzheimers: upAD in TC	Webster et al 2009	TC	Microarray	Up	835	130|102	TCx	T-test, q<0.000001 in GSE15222	Matched PMI between AD and control; RIN not reported
Avramopoulos2011_Alzheimers: downAD in SupTL	Avramopoulos et al 2011	Sup. TL	RNA-Seq	Down	421	22|23	TCx	Supplementary Table 2 (FDR p<0.05)	Not reported
Avramopoulos2011_Alzheimers: upAD in SupTL	Avramopoulos et al 2011	Sup. TL	RNA-Seq	Up	443	22|23	TCx	Supplementary Table 2 (FDR p<0.05)	Not reported
Miller_Alzheimers: downAD in CA3	Miller et al 2013	CA3	Microarray	Down	167	16|15	HIP	Table S2	Matched PMI between AD and control; RIN not reported
Miller_Alzheimers: upAD in CA3	Miller et al 2013	CA3	Microarray	Up	362	16|15	HIP	Table S2	Matched PMI between AD and control; RIN not reported
DownWithAlzheimers_Liang_MTG	Liang et al 2008	MTG	Microarray	Down	2274	12|16	TCx	Supplemental material (T-test, FDR-corrected p<0.01)	Unknown; RIN>6.5 cutoff in RT-PCR validation
UpWithAlzheimers_Liang_MTG	Liang et al 2008	MTG	Microarray	Up	2724	12|16	TCx	Supplemental material (T-test, FDR-corrected p<0.01)	Unknown; RIN>6.5 cutoff in RT-PCR validation
DownWithAlzheimers_Liang_HIP	Liang et al 2008	HIP	Microarray	Down	2169	13|10	HIP	Supplemental material (T-test, FDR-corrected p<0.01)	Unknown; RIN>6.5 cutoff in RT-PCR validation
UpWithAlzheimers_Liang_HIP	Liang et al 2008	HIP	Microarray	Up	1381	13|10	HIP	Supplemental material (T-test, FDR-corrected p<0.01)	Unknown; RIN>6.5 cutoff in RT-PCR validation
Zhang_Alzheimers: Neg. cor. w/ Braak stage in CB	Zhang et al 2013	CB	Microarray	Down	414	101|129	TCx	Table S1, "Braak stage correlation", R < -0.50	RIN corrected
Zhang_Alzheimers: Pos. cor. w/ Braak stage in CB	Zhang et al 2013	CB	Microarray	Up	375	101|129	TCx	Table S1, "Braak stage correlation", R > 0.50	RIN corrected
