# Supplementary material for: Neuropathological and transcriptomic characteristics of the aged brain
Source: eLife. 2017 Nov 9;6:e31126. doi: 10.7554/eLife.31126 (PMC5679757; doi:10.7554/eLife.31126)
Supplement: Figure 6—source data 5. [file elife-31126-fig6-data5.xlsx]

## Sheet: SourceData5
Gene	Category
PPEF1	Avramopoulos2011_Alzheimers: downAD in SupTL
RAB3C	Avramopoulos2011_Alzheimers: downAD in SupTL
VGF	Avramopoulos2011_Alzheimers: downAD in SupTL
FRMPD2	Avramopoulos2011_Alzheimers: downAD in SupTL
SLC39A3	Avramopoulos2011_Alzheimers: downAD in SupTL
CACNB1	Avramopoulos2011_Alzheimers: downAD in SupTL
ODF2L	Avramopoulos2011_Alzheimers: downAD in SupTL
KCNF1	Avramopoulos2011_Alzheimers: downAD in SupTL
RNF165	Avramopoulos2011_Alzheimers: downAD in SupTL
WNT10B	Avramopoulos2011_Alzheimers: downAD in SupTL
OCA2	Avramopoulos2011_Alzheimers: downAD in SupTL
SAMD14	Avramopoulos2011_Alzheimers: downAD in SupTL
KCTD4	Avramopoulos2011_Alzheimers: downAD in SupTL
NEUROD6	Avramopoulos2011_Alzheimers: downAD in SupTL
PCNXL2	Avramopoulos2011_Alzheimers: downAD in SupTL
NETO1	Avramopoulos2011_Alzheimers: downAD in SupTL
SNAPC5	Avramopoulos2011_Alzheimers: downAD in SupTL
CACNB1	Avramopoulos2011_Alzheimers: downAD in SupTL
RBM11	Avramopoulos2011_Alzheimers: downAD in SupTL
RPL37A	Avramopoulos2011_Alzheimers: downAD in SupTL
NDUFB4	Avramopoulos2011_Alzheimers: downAD in SupTL
SLC37A1	Avramopoulos2011_Alzheimers: downAD in SupTL
BNIP1	Avramopoulos2011_Alzheimers: downAD in SupTL
CHAF1B	Avramopoulos2011_Alzheimers: downAD in SupTL
CIRH1A	Avramopoulos2011_Alzheimers: downAD in SupTL
HSPB3	Avramopoulos2011_Alzheimers: downAD in SupTL
PANK3	Avramopoulos2011_Alzheimers: downAD in SupTL
RASGEF1C	Avramopoulos2011_Alzheimers: downAD in SupTL
RBP4	Avramopoulos2011_Alzheimers: downAD in SupTL
IDS	Avramopoulos2011_Alzheimers: downAD in SupTL
NDUFC2	Avramopoulos2011_Alzheimers: downAD in SupTL
GPR68	Avramopoulos2011_Alzheimers: downAD in SupTL
ARMCX5	Avramopoulos2011_Alzheimers: downAD in SupTL
IL12RB2	Avramopoulos2011_Alzheimers: downAD in SupTL
SLC7A4	Avramopoulos2011_Alzheimers: downAD in SupTL
CAMK2D	Avramopoulos2011_Alzheimers: downAD in SupTL
KCNB2	Avramopoulos2011_Alzheimers: downAD in SupTL
TPD52	Avramopoulos2011_Alzheimers: downAD in SupTL
SEZ6	Avramopoulos2011_Alzheimers: downAD in SupTL
CTXN1	Avramopoulos2011_Alzheimers: downAD in SupTL
ADCYAP1	Avramopoulos2011_Alzheimers: downAD in SupTL
RCHY1	Avramopoulos2011_Alzheimers: downAD in SupTL
EIF2B3	Avramopoulos2011_Alzheimers: downAD in SupTL
RAD51C	Avramopoulos2011_Alzheimers: downAD in SupTL
PRMT8	Avramopoulos2011_Alzheimers: downAD in SupTL
COCH	Avramopoulos2011_Alzheimers: downAD in SupTL
DMXL2	Avramopoulos2011_Alzheimers: downAD in SupTL
LRRC40	Avramopoulos2011_Alzheimers: downAD in SupTL
SST	Avramopoulos2011_Alzheimers: downAD in SupTL
UHMK1	Avramopoulos2011_Alzheimers: downAD in SupTL
LY6H	Avramopoulos2011_Alzheimers: downAD in SupTL
DNAJC10	Avramopoulos2011_Alzheimers: downAD in SupTL
CORT	Avramopoulos2011_Alzheimers: downAD in SupTL
NMT2	Avramopoulos2011_Alzheimers: downAD in SupTL
PRPF18	Avramopoulos2011_Alzheimers: downAD in SupTL
SLBP	Avramopoulos2011_Alzheimers: downAD in SupTL
PNMA5	Avramopoulos2011_Alzheimers: downAD in SupTL
TMEM17	Avramopoulos2011_Alzheimers: downAD in SupTL
HDAC9	Avramopoulos2011_Alzheimers: downAD in SupTL
PSMD9	Avramopoulos2011_Alzheimers: downAD in SupTL
IMMP2L	Avramopoulos2011_Alzheimers: downAD in SupTL
RFK	Avramopoulos2011_Alzheimers: downAD in SupTL
ZNF593	Avramopoulos2011_Alzheimers: downAD in SupTL
SYAP1	Avramopoulos2011_Alzheimers: downAD in SupTL
SLIT1	Avramopoulos2011_Alzheimers: downAD in SupTL
TLK1	Avramopoulos2011_Alzheimers: downAD in SupTL
DDA1	Avramopoulos2011_Alzheimers: downAD in SupTL
ASPH	Avramopoulos2011_Alzheimers: downAD in SupTL
KCNQ3	Avramopoulos2011_Alzheimers: downAD in SupTL
NNAT	Avramopoulos2011_Alzheimers: downAD in SupTL
MOXD1	Avramopoulos2011_Alzheimers: downAD in SupTL
FAM49A	Avramopoulos2011_Alzheimers: downAD in SupTL
TCEAL5	Avramopoulos2011_Alzheimers: downAD in SupTL
ENTPD6	Avramopoulos2011_Alzheimers: downAD in SupTL
DUSP4	Avramopoulos2011_Alzheimers: downAD in SupTL
COPS7A	Avramopoulos2011_Alzheimers: downAD in SupTL
SULT1A1	Avramopoulos2011_Alzheimers: downAD in SupTL
PIAS2	Avramopoulos2011_Alzheimers: downAD in SupTL
TNFAIP8L3	Avramopoulos2011_Alzheimers: downAD in SupTL
SEC23A	Avramopoulos2011_Alzheimers: downAD in SupTL
BYSL	Avramopoulos2011_Alzheimers: downAD in SupTL
HMGCLL1	Avramopoulos2011_Alzheimers: downAD in SupTL
DAK	Avramopoulos2011_Alzheimers: downAD in SupTL
GGH	Avramopoulos2011_Alzheimers: downAD in SupTL
WIF1	Avramopoulos2011_Alzheimers: downAD in SupTL
CRHBP	Avramopoulos2011_Alzheimers: downAD in SupTL
STX1A	Avramopoulos2011_Alzheimers: downAD in SupTL
ABCA5	Avramopoulos2011_Alzheimers: downAD in SupTL
MAN1A1	Avramopoulos2011_Alzheimers: downAD in SupTL
WHSC1	Avramopoulos2011_Alzheimers: downAD in SupTL
GLRA2	Avramopoulos2011_Alzheimers: downAD in SupTL
PDCD10	Avramopoulos2011_Alzheimers: downAD in SupTL
LARGE	Avramopoulos2011_Alzheimers: downAD in SupTL
GCNT1	Avramopoulos2011_Alzheimers: downAD in SupTL
SPA17	Avramopoulos2011_Alzheimers: downAD in SupTL
GDA	Avramopoulos2011_Alzheimers: downAD in SupTL
TRAF5	Avramopoulos2011_Alzheimers: downAD in SupTL
BBS7	Avramopoulos2011_Alzheimers: downAD in SupTL
UBL7	Avramopoulos2011_Alzheimers: downAD in SupTL
ACOT7	Avramopoulos2011_Alzheimers: downAD in SupTL
B3GNT4	Avramopoulos2011_Alzheimers: downAD in SupTL
NIPSNAP3A	Avramopoulos2011_Alzheimers: downAD in SupTL
NAT6	Avramopoulos2011_Alzheimers: downAD in SupTL
METTL6	Avramopoulos2011_Alzheimers: downAD in SupTL
MSH2	Avramopoulos2011_Alzheimers: downAD in SupTL
ENSA	Avramopoulos2011_Alzheimers: downAD in SupTL
LMTK2	Avramopoulos2011_Alzheimers: downAD in SupTL
LRRC20	Avramopoulos2011_Alzheimers: downAD in SupTL
ST6GALNAC5	Avramopoulos2011_Alzheimers: downAD in SupTL
HS6ST2	Avramopoulos2011_Alzheimers: downAD in SupTL
HRK	Avramopoulos2011_Alzheimers: downAD in SupTL
ROBO2	Avramopoulos2011_Alzheimers: downAD in SupTL
TYRP1	Avramopoulos2011_Alzheimers: downAD in SupTL
KLK7	Avramopoulos2011_Alzheimers: downAD in SupTL
SNX25	Avramopoulos2011_Alzheimers: downAD in SupTL
FBXO11	Avramopoulos2011_Alzheimers: downAD in SupTL
TTC9C	Avramopoulos2011_Alzheimers: downAD in SupTL
EBP	Avramopoulos2011_Alzheimers: downAD in SupTL
KIF17	Avramopoulos2011_Alzheimers: downAD in SupTL
BPNT1	Avramopoulos2011_Alzheimers: downAD in SupTL
DNAJB14	Avramopoulos2011_Alzheimers: downAD in SupTL
SSBP4	Avramopoulos2011_Alzheimers: downAD in SupTL
RPP40	Avramopoulos2011_Alzheimers: downAD in SupTL
UROS	Avramopoulos2011_Alzheimers: downAD in SupTL
SLC1A6	Avramopoulos2011_Alzheimers: downAD in SupTL
PLA2G7	Avramopoulos2011_Alzheimers: downAD in SupTL
RASAL2	Avramopoulos2011_Alzheimers: downAD in SupTL
LRSAM1	Avramopoulos2011_Alzheimers: downAD in SupTL
DLGAP1	Avramopoulos2011_Alzheimers: downAD in SupTL
NDUFS3	Avramopoulos2011_Alzheimers: downAD in SupTL
KCTD16	Avramopoulos2011_Alzheimers: downAD in SupTL
SEZ6L2	Avramopoulos2011_Alzheimers: downAD in SupTL
MIF	Avramopoulos2011_Alzheimers: downAD in SupTL
CBLN4	Avramopoulos2011_Alzheimers: downAD in SupTL
DNAJC5	Avramopoulos2011_Alzheimers: downAD in SupTL
RFC3	Avramopoulos2011_Alzheimers: downAD in SupTL
MKKS	Avramopoulos2011_Alzheimers: downAD in SupTL
GNG3	Avramopoulos2011_Alzheimers: downAD in SupTL
MAP1LC3A	Avramopoulos2011_Alzheimers: downAD in SupTL
CRY2	Avramopoulos2011_Alzheimers: downAD in SupTL
TCEAL6	Avramopoulos2011_Alzheimers: downAD in SupTL
ACOT4	Avramopoulos2011_Alzheimers: downAD in SupTL
CDH22	Avramopoulos2011_Alzheimers: downAD in SupTL
KDELR3	Avramopoulos2011_Alzheimers: downAD in SupTL
HRASLS	Avramopoulos2011_Alzheimers: downAD in SupTL
GPI	Avramopoulos2011_Alzheimers: downAD in SupTL
FBXO3	Avramopoulos2011_Alzheimers: downAD in SupTL
CCNB1	Avramopoulos2011_Alzheimers: downAD in SupTL
CCDC43	Avramopoulos2011_Alzheimers: downAD in SupTL
SYT12	Avramopoulos2011_Alzheimers: downAD in SupTL
MLF1	Avramopoulos2011_Alzheimers: downAD in SupTL
YEATS4	Avramopoulos2011_Alzheimers: downAD in SupTL
RPS15	Avramopoulos2011_Alzheimers: downAD in SupTL
IL13RA2	Avramopoulos2011_Alzheimers: downAD in SupTL
MAEL	Avramopoulos2011_Alzheimers: downAD in SupTL
WSB2	Avramopoulos2011_Alzheimers: downAD in SupTL
GPR22	Avramopoulos2011_Alzheimers: downAD in SupTL
PDE1A	Avramopoulos2011_Alzheimers: downAD in SupTL
NDUFAB1	Avramopoulos2011_Alzheimers: downAD in SupTL
PPIL6	Avramopoulos2011_Alzheimers: downAD in SupTL
STK32C	Avramopoulos2011_Alzheimers: downAD in SupTL
RIN1	Avramopoulos2011_Alzheimers: downAD in SupTL
ZDHHC23	Avramopoulos2011_Alzheimers: downAD in SupTL
PPIH	Avramopoulos2011_Alzheimers: downAD in SupTL
BSCL2	Avramopoulos2011_Alzheimers: downAD in SupTL
DNAJC19	Avramopoulos2011_Alzheimers: downAD in SupTL
NUDT14	Avramopoulos2011_Alzheimers: downAD in SupTL
DPYSL4	Avramopoulos2011_Alzheimers: downAD in SupTL
OTUB1	Avramopoulos2011_Alzheimers: downAD in SupTL
DIRAS3	Avramopoulos2011_Alzheimers: downAD in SupTL
ANKRA2	Avramopoulos2011_Alzheimers: downAD in SupTL
PCMT1	Avramopoulos2011_Alzheimers: downAD in SupTL
ATP5G3	Avramopoulos2011_Alzheimers: downAD in SupTL
EPHA5	Avramopoulos2011_Alzheimers: downAD in SupTL
ANKRD16	Avramopoulos2011_Alzheimers: downAD in SupTL
KLHDC4	Avramopoulos2011_Alzheimers: downAD in SupTL
TRAPPC1	Avramopoulos2011_Alzheimers: downAD in SupTL
CRYM	Avramopoulos2011_Alzheimers: downAD in SupTL
SLC25A6	Avramopoulos2011_Alzheimers: downAD in SupTL
CSTF2	Avramopoulos2011_Alzheimers: downAD in SupTL
ACTR1A	Avramopoulos2011_Alzheimers: downAD in SupTL
LAMB1	Avramopoulos2011_Alzheimers: downAD in SupTL
SERPINF1	Avramopoulos2011_Alzheimers: downAD in SupTL
RPUSD3	Avramopoulos2011_Alzheimers: downAD in SupTL
ARHGDIA	Avramopoulos2011_Alzheimers: downAD in SupTL
LUZP2	Avramopoulos2011_Alzheimers: downAD in SupTL
CAMKK1	Avramopoulos2011_Alzheimers: downAD in SupTL
ATP5J2	Avramopoulos2011_Alzheimers: downAD in SupTL
TMEM65	Avramopoulos2011_Alzheimers: downAD in SupTL
KCNAB1	Avramopoulos2011_Alzheimers: downAD in SupTL
CCKBR	Avramopoulos2011_Alzheimers: downAD in SupTL
FIBP	Avramopoulos2011_Alzheimers: downAD in SupTL
GABBR1	Avramopoulos2011_Alzheimers: downAD in SupTL
HSPA14	Avramopoulos2011_Alzheimers: downAD in SupTL
SLC25A15	Avramopoulos2011_Alzheimers: downAD in SupTL
CCT6B	Avramopoulos2011_Alzheimers: downAD in SupTL
KCNG1	Avramopoulos2011_Alzheimers: downAD in SupTL
WBSCR17	Avramopoulos2011_Alzheimers: downAD in SupTL
RASAL1	Avramopoulos2011_Alzheimers: downAD in SupTL
PEX3	Avramopoulos2011_Alzheimers: downAD in SupTL
PSMC3	Avramopoulos2011_Alzheimers: downAD in SupTL
TPM1	Avramopoulos2011_Alzheimers: downAD in SupTL
HRAS	Avramopoulos2011_Alzheimers: downAD in SupTL
GYPE	Avramopoulos2011_Alzheimers: downAD in SupTL
HPCA	Avramopoulos2011_Alzheimers: downAD in SupTL
AQP11	Avramopoulos2011_Alzheimers: downAD in SupTL
GTF2H3	Avramopoulos2011_Alzheimers: downAD in SupTL
TCEA2	Avramopoulos2011_Alzheimers: downAD in SupTL
PVRL3	Avramopoulos2011_Alzheimers: downAD in SupTL
GRP	Avramopoulos2011_Alzheimers: downAD in SupTL
SSTR1	Avramopoulos2011_Alzheimers: downAD in SupTL
CNTN6	Avramopoulos2011_Alzheimers: downAD in SupTL
RTF1	Avramopoulos2011_Alzheimers: downAD in SupTL
PSMC5	Avramopoulos2011_Alzheimers: downAD in SupTL
SCN3B	Avramopoulos2011_Alzheimers: downAD in SupTL
TTC9B	Avramopoulos2011_Alzheimers: downAD in SupTL
ZNF226	Avramopoulos2011_Alzheimers: downAD in SupTL
YWHAB	Avramopoulos2011_Alzheimers: downAD in SupTL
RNF111	Avramopoulos2011_Alzheimers: downAD in SupTL
CCDC74B	Avramopoulos2011_Alzheimers: downAD in SupTL
KCNC2	Avramopoulos2011_Alzheimers: downAD in SupTL
DNAJC11	Avramopoulos2011_Alzheimers: downAD in SupTL
HMGCS1	Avramopoulos2011_Alzheimers: downAD in SupTL
FRG1	Avramopoulos2011_Alzheimers: downAD in SupTL
OLFM3	Avramopoulos2011_Alzheimers: downAD in SupTL
CDH8	Avramopoulos2011_Alzheimers: downAD in SupTL
CCRN4L	Avramopoulos2011_Alzheimers: downAD in SupTL
RBM24	Avramopoulos2011_Alzheimers: downAD in SupTL
NDUFB10	Avramopoulos2011_Alzheimers: downAD in SupTL
TBC1D8	Avramopoulos2011_Alzheimers: downAD in SupTL
ARMC5	Avramopoulos2011_Alzheimers: downAD in SupTL
PLD3	Avramopoulos2011_Alzheimers: downAD in SupTL
CLYBL	Avramopoulos2011_Alzheimers: downAD in SupTL
SQLE	Avramopoulos2011_Alzheimers: downAD in SupTL
SYCE1	Avramopoulos2011_Alzheimers: downAD in SupTL
ME3	Avramopoulos2011_Alzheimers: downAD in SupTL
MAP6	Avramopoulos2011_Alzheimers: downAD in SupTL
TMEM117	Avramopoulos2011_Alzheimers: downAD in SupTL
PRKCG	Avramopoulos2011_Alzheimers: downAD in SupTL
SORCS3	Avramopoulos2011_Alzheimers: downAD in SupTL
CDC42SE2	Avramopoulos2011_Alzheimers: downAD in SupTL
OLFM1	Avramopoulos2011_Alzheimers: downAD in SupTL
FOSB	Avramopoulos2011_Alzheimers: downAD in SupTL
MRPL28	Avramopoulos2011_Alzheimers: downAD in SupTL
ZNHIT3	Avramopoulos2011_Alzheimers: downAD in SupTL
KCNK1	Avramopoulos2011_Alzheimers: downAD in SupTL
SUSD1	Avramopoulos2011_Alzheimers: downAD in SupTL
SPRYD3	Avramopoulos2011_Alzheimers: downAD in SupTL
AP2S1	Avramopoulos2011_Alzheimers: downAD in SupTL
KCNIP1	Avramopoulos2011_Alzheimers: downAD in SupTL
STOML1	Avramopoulos2011_Alzheimers: downAD in SupTL
ATG7	Avramopoulos2011_Alzheimers: downAD in SupTL
RSPO3	Avramopoulos2011_Alzheimers: downAD in SupTL
KCNV1	Avramopoulos2011_Alzheimers: downAD in SupTL
TBC1D19	Avramopoulos2011_Alzheimers: downAD in SupTL
NPTXR	Avramopoulos2011_Alzheimers: downAD in SupTL
E2F3	Avramopoulos2011_Alzheimers: downAD in SupTL
VRK1	Avramopoulos2011_Alzheimers: downAD in SupTL
LRRC7	Avramopoulos2011_Alzheimers: downAD in SupTL
MEIS3	Avramopoulos2011_Alzheimers: downAD in SupTL
KCNMA1	Avramopoulos2011_Alzheimers: downAD in SupTL
DNAL4	Avramopoulos2011_Alzheimers: downAD in SupTL
ZNF425	Avramopoulos2011_Alzheimers: downAD in SupTL
CPNE5	Avramopoulos2011_Alzheimers: downAD in SupTL
TCERG1L	Avramopoulos2011_Alzheimers: downAD in SupTL
LRRTM4	Avramopoulos2011_Alzheimers: downAD in SupTL
TMEM128	Avramopoulos2011_Alzheimers: downAD in SupTL
CTDSPL2	Avramopoulos2011_Alzheimers: downAD in SupTL
HCFC1R1	Avramopoulos2011_Alzheimers: downAD in SupTL
MAT2B	Avramopoulos2011_Alzheimers: downAD in SupTL
CDKN3	Avramopoulos2011_Alzheimers: downAD in SupTL
KCNIP4	Avramopoulos2011_Alzheimers: downAD in SupTL
VPS25	Avramopoulos2011_Alzheimers: downAD in SupTL
NDUFA8	Avramopoulos2011_Alzheimers: downAD in SupTL
RPRML	Avramopoulos2011_Alzheimers: downAD in SupTL
POLR3C	Avramopoulos2011_Alzheimers: downAD in SupTL
WDR54	Avramopoulos2011_Alzheimers: downAD in SupTL
GLIPR1	Avramopoulos2011_Alzheimers: downAD in SupTL
HOMER2	Avramopoulos2011_Alzheimers: downAD in SupTL
CYP4X1	Avramopoulos2011_Alzheimers: downAD in SupTL
SYNGR1	Avramopoulos2011_Alzheimers: downAD in SupTL
DACH2	Avramopoulos2011_Alzheimers: downAD in SupTL
MAN1B1	Avramopoulos2011_Alzheimers: downAD in SupTL
LRFN2	Avramopoulos2011_Alzheimers: downAD in SupTL
DOPEY2	Avramopoulos2011_Alzheimers: downAD in SupTL
ZNF720	Avramopoulos2011_Alzheimers: downAD in SupTL
DGKI	Avramopoulos2011_Alzheimers: downAD in SupTL
HARS	Avramopoulos2011_Alzheimers: downAD in SupTL
STYK1	Avramopoulos2011_Alzheimers: downAD in SupTL
TNNT1	Avramopoulos2011_Alzheimers: downAD in SupTL
RPS7	Avramopoulos2011_Alzheimers: downAD in SupTL
PTPRR	Avramopoulos2011_Alzheimers: downAD in SupTL
ST3GAL2	Avramopoulos2011_Alzheimers: downAD in SupTL
TCEAL8	Avramopoulos2011_Alzheimers: downAD in SupTL
SIDT1	Avramopoulos2011_Alzheimers: downAD in SupTL
GABARAPL1	Avramopoulos2011_Alzheimers: downAD in SupTL
M6PR	Avramopoulos2011_Alzheimers: downAD in SupTL
LRRC57	Avramopoulos2011_Alzheimers: downAD in SupTL
ANKRD6	Avramopoulos2011_Alzheimers: downAD in SupTL
ITPA	Avramopoulos2011_Alzheimers: downAD in SupTL
GRIK2	Avramopoulos2011_Alzheimers: downAD in SupTL
THY1	Avramopoulos2011_Alzheimers: downAD in SupTL
HPCAL1	Avramopoulos2011_Alzheimers: downAD in SupTL
HTR2C	Avramopoulos2011_Alzheimers: downAD in SupTL
PDK3	Avramopoulos2011_Alzheimers: downAD in SupTL
TIMM17B	Avramopoulos2011_Alzheimers: downAD in SupTL
KIF22	Avramopoulos2011_Alzheimers: downAD in SupTL
PDE1A	Avramopoulos2011_Alzheimers: downAD in SupTL
FGD1	Avramopoulos2011_Alzheimers: downAD in SupTL
GAP43	Avramopoulos2011_Alzheimers: downAD in SupTL
EID3	Avramopoulos2011_Alzheimers: downAD in SupTL
ZGPAT	Avramopoulos2011_Alzheimers: downAD in SupTL
NUDT18	Avramopoulos2011_Alzheimers: downAD in SupTL
PRKAR1B	Avramopoulos2011_Alzheimers: downAD in SupTL
MANEAL	Avramopoulos2011_Alzheimers: downAD in SupTL
PDZD7	Avramopoulos2011_Alzheimers: downAD in SupTL
PRPF19	Avramopoulos2011_Alzheimers: downAD in SupTL
SLC30A3	Avramopoulos2011_Alzheimers: downAD in SupTL
DNAJC12	Avramopoulos2011_Alzheimers: downAD in SupTL
PRKCE	Avramopoulos2011_Alzheimers: downAD in SupTL
PHF14	Avramopoulos2011_Alzheimers: downAD in SupTL
HN1	Avramopoulos2011_Alzheimers: downAD in SupTL
ME1	Avramopoulos2011_Alzheimers: downAD in SupTL
FGF12	Avramopoulos2011_Alzheimers: downAD in SupTL
ZC3H8	Avramopoulos2011_Alzheimers: downAD in SupTL
CASC2	Avramopoulos2011_Alzheimers: downAD in SupTL
RHBDD2	Avramopoulos2011_Alzheimers: downAD in SupTL
POLR3F	Avramopoulos2011_Alzheimers: downAD in SupTL
GUCY1B3	Avramopoulos2011_Alzheimers: downAD in SupTL
KRT17	Avramopoulos2011_Alzheimers: downAD in SupTL
FBXO4	Avramopoulos2011_Alzheimers: downAD in SupTL
SCAND1	Avramopoulos2011_Alzheimers: downAD in SupTL
EIF2S1	Avramopoulos2011_Alzheimers: downAD in SupTL
GLMN	Avramopoulos2011_Alzheimers: downAD in SupTL
ETV5	Avramopoulos2011_Alzheimers: downAD in SupTL
NEFL	Avramopoulos2011_Alzheimers: downAD in SupTL
NPY5R	Avramopoulos2011_Alzheimers: downAD in SupTL
RPL41	Avramopoulos2011_Alzheimers: downAD in SupTL
SEPHS2	Avramopoulos2011_Alzheimers: downAD in SupTL
TFB2M	Avramopoulos2011_Alzheimers: downAD in SupTL
UTP11L	Avramopoulos2011_Alzheimers: downAD in SupTL
FKBP3	Avramopoulos2011_Alzheimers: downAD in SupTL
PNMT	Avramopoulos2011_Alzheimers: downAD in SupTL
MSTO1	Avramopoulos2011_Alzheimers: downAD in SupTL
NDUFS8	Avramopoulos2011_Alzheimers: downAD in SupTL
CNIH3	Avramopoulos2011_Alzheimers: downAD in SupTL
SPATA5L1	Avramopoulos2011_Alzheimers: downAD in SupTL
MRPL42	Avramopoulos2011_Alzheimers: downAD in SupTL
PHYH	Avramopoulos2011_Alzheimers: downAD in SupTL
R3HDM2	Avramopoulos2011_Alzheimers: downAD in SupTL
PIN1	Avramopoulos2011_Alzheimers: downAD in SupTL
NDUFB1	Avramopoulos2011_Alzheimers: downAD in SupTL
PEX13	Avramopoulos2011_Alzheimers: downAD in SupTL
BMP2K	Avramopoulos2011_Alzheimers: downAD in SupTL
PTPRO	Avramopoulos2011_Alzheimers: downAD in SupTL
CBX6	Avramopoulos2011_Alzheimers: downAD in SupTL
SENP5	Avramopoulos2011_Alzheimers: downAD in SupTL
NOXA1	Avramopoulos2011_Alzheimers: downAD in SupTL
SHANK2	Avramopoulos2011_Alzheimers: downAD in SupTL
DDX25	Avramopoulos2011_Alzheimers: downAD in SupTL
KHDRBS1	Avramopoulos2011_Alzheimers: downAD in SupTL
ERCC1	Avramopoulos2011_Alzheimers: downAD in SupTL
REEP2	Avramopoulos2011_Alzheimers: downAD in SupTL
SUV39H1	Avramopoulos2011_Alzheimers: downAD in SupTL
POLR2D	Avramopoulos2011_Alzheimers: downAD in SupTL
BOLA1	Avramopoulos2011_Alzheimers: downAD in SupTL
EPHA3	Avramopoulos2011_Alzheimers: downAD in SupTL
PLA2G12A	Avramopoulos2011_Alzheimers: downAD in SupTL
CLTC	Avramopoulos2011_Alzheimers: downAD in SupTL
BZRAP1	Avramopoulos2011_Alzheimers: downAD in SupTL
LIAS	Avramopoulos2011_Alzheimers: downAD in SupTL
HMP19	Avramopoulos2011_Alzheimers: downAD in SupTL
CD2BP2	Avramopoulos2011_Alzheimers: downAD in SupTL
KCTD17	Avramopoulos2011_Alzheimers: downAD in SupTL
ERO1L	Avramopoulos2011_Alzheimers: downAD in SupTL
FBLN2	Avramopoulos2011_Alzheimers: downAD in SupTL
TOM1L2	Avramopoulos2011_Alzheimers: downAD in SupTL
GSR	Avramopoulos2011_Alzheimers: downAD in SupTL
GPRASP1	Avramopoulos2011_Alzheimers: downAD in SupTL
THTPA	Avramopoulos2011_Alzheimers: downAD in SupTL
WDR41	Avramopoulos2011_Alzheimers: downAD in SupTL
ZNF354A	Avramopoulos2011_Alzheimers: downAD in SupTL
SLC37A3	Avramopoulos2011_Alzheimers: downAD in SupTL
FBXL14	Avramopoulos2011_Alzheimers: downAD in SupTL
ZNF667	Avramopoulos2011_Alzheimers: downAD in SupTL
TCEB2	Avramopoulos2011_Alzheimers: downAD in SupTL
RPL39L	Avramopoulos2011_Alzheimers: downAD in SupTL
MYL5	Avramopoulos2011_Alzheimers: downAD in SupTL
RB1	Avramopoulos2011_Alzheimers: downAD in SupTL
PKIB	Avramopoulos2011_Alzheimers: downAD in SupTL
HCFC2	Avramopoulos2011_Alzheimers: downAD in SupTL
LCMT1	Avramopoulos2011_Alzheimers: downAD in SupTL
WASF1	Avramopoulos2011_Alzheimers: downAD in SupTL
TSPYL4	Avramopoulos2011_Alzheimers: downAD in SupTL
FAM19A1	Avramopoulos2011_Alzheimers: downAD in SupTL
ADAMTS3	Avramopoulos2011_Alzheimers: downAD in SupTL
FLRT1	Avramopoulos2011_Alzheimers: downAD in SupTL
BAIAP3	Avramopoulos2011_Alzheimers: downAD in SupTL
THYN1	Avramopoulos2011_Alzheimers: downAD in SupTL
MAL2	Avramopoulos2011_Alzheimers: downAD in SupTL
ETNK1	Avramopoulos2011_Alzheimers: downAD in SupTL
EDF1	Avramopoulos2011_Alzheimers: downAD in SupTL
UFC1	Avramopoulos2011_Alzheimers: downAD in SupTL
MLX	Avramopoulos2011_Alzheimers: downAD in SupTL
GOLGA8A	Avramopoulos2011_Alzheimers: downAD in SupTL
RASGRF1	Avramopoulos2011_Alzheimers: downAD in SupTL
IREB2	Avramopoulos2011_Alzheimers: downAD in SupTL
PPIL1	Avramopoulos2011_Alzheimers: downAD in SupTL
RIMBP2	Avramopoulos2011_Alzheimers: downAD in SupTL
STEAP1	Avramopoulos2011_Alzheimers: downAD in SupTL
PGAM1	Avramopoulos2011_Alzheimers: downAD in SupTL
FXYD7	Avramopoulos2011_Alzheimers: downAD in SupTL
RAD54L	Avramopoulos2011_Alzheimers: downAD in SupTL
ASAH1	Avramopoulos2011_Alzheimers: downAD in SupTL
NPAS1	Avramopoulos2011_Alzheimers: downAD in SupTL
CHCHD6	Avramopoulos2011_Alzheimers: downAD in SupTL
AGGF1	Avramopoulos2011_Alzheimers: downAD in SupTL
FARP2	Avramopoulos2011_Alzheimers: downAD in SupTL
TBC1D22A	Avramopoulos2011_Alzheimers: downAD in SupTL
GNG4	Avramopoulos2011_Alzheimers: downAD in SupTL
UBQLN1	Avramopoulos2011_Alzheimers: downAD in SupTL
TJP1	Avramopoulos2011_Alzheimers: upAD in SupTL
CTDSP2	Avramopoulos2011_Alzheimers: upAD in SupTL
ILK	Avramopoulos2011_Alzheimers: upAD in SupTL
CIC	Avramopoulos2011_Alzheimers: upAD in SupTL
AATF	Avramopoulos2011_Alzheimers: upAD in SupTL
NFKB1	Avramopoulos2011_Alzheimers: upAD in SupTL
POGK	Avramopoulos2011_Alzheimers: upAD in SupTL
REPIN1	Avramopoulos2011_Alzheimers: upAD in SupTL
RBM17	Avramopoulos2011_Alzheimers: upAD in SupTL
PHF2	Avramopoulos2011_Alzheimers: upAD in SupTL
SPEN	Avramopoulos2011_Alzheimers: upAD in SupTL
MAF1	Avramopoulos2011_Alzheimers: upAD in SupTL
GLTP	Avramopoulos2011_Alzheimers: upAD in SupTL
ARHGEF10	Avramopoulos2011_Alzheimers: upAD in SupTL
TBC1D14	Avramopoulos2011_Alzheimers: upAD in SupTL
CNKSR3	Avramopoulos2011_Alzheimers: upAD in SupTL
GATAD2A	Avramopoulos2011_Alzheimers: upAD in SupTL
DOCK1	Avramopoulos2011_Alzheimers: upAD in SupTL
COBL	Avramopoulos2011_Alzheimers: upAD in SupTL
DNAJB6	Avramopoulos2011_Alzheimers: upAD in SupTL
DAAM2	Avramopoulos2011_Alzheimers: upAD in SupTL
LBR	Avramopoulos2011_Alzheimers: upAD in SupTL
MTMR3	Avramopoulos2011_Alzheimers: upAD in SupTL
SLC39A1	Avramopoulos2011_Alzheimers: upAD in SupTL
ANLN	Avramopoulos2011_Alzheimers: upAD in SupTL
DLL1	Avramopoulos2011_Alzheimers: upAD in SupTL
PACSIN2	Avramopoulos2011_Alzheimers: upAD in SupTL
ZFYVE26	Avramopoulos2011_Alzheimers: upAD in SupTL
ZHX3	Avramopoulos2011_Alzheimers: upAD in SupTL
RERE	Avramopoulos2011_Alzheimers: upAD in SupTL
HDAC1	Avramopoulos2011_Alzheimers: upAD in SupTL
EPB41L5	Avramopoulos2011_Alzheimers: upAD in SupTL
ZNFX1	Avramopoulos2011_Alzheimers: upAD in SupTL
PHACTR4	Avramopoulos2011_Alzheimers: upAD in SupTL
MID1IP1	Avramopoulos2011_Alzheimers: upAD in SupTL
FA2H	Avramopoulos2011_Alzheimers: upAD in SupTL
IFNGR1	Avramopoulos2011_Alzheimers: upAD in SupTL
SMAD5	Avramopoulos2011_Alzheimers: upAD in SupTL
NEO1	Avramopoulos2011_Alzheimers: upAD in SupTL
FKBP5	Avramopoulos2011_Alzheimers: upAD in SupTL
ASB6	Avramopoulos2011_Alzheimers: upAD in SupTL
QDPR	Avramopoulos2011_Alzheimers: upAD in SupTL
CD59	Avramopoulos2011_Alzheimers: upAD in SupTL
MAN2A1	Avramopoulos2011_Alzheimers: upAD in SupTL
FXR1	Avramopoulos2011_Alzheimers: upAD in SupTL
RCC2	Avramopoulos2011_Alzheimers: upAD in SupTL
LAMC1	Avramopoulos2011_Alzheimers: upAD in SupTL
ELF1	Avramopoulos2011_Alzheimers: upAD in SupTL
HS1BP3	Avramopoulos2011_Alzheimers: upAD in SupTL
ARRDC2	Avramopoulos2011_Alzheimers: upAD in SupTL
GAS6	Avramopoulos2011_Alzheimers: upAD in SupTL
RBM23	Avramopoulos2011_Alzheimers: upAD in SupTL
MAP4K4	Avramopoulos2011_Alzheimers: upAD in SupTL
MYOT	Avramopoulos2011_Alzheimers: upAD in SupTL
SPP1	Avramopoulos2011_Alzheimers: upAD in SupTL
TXNDC5	Avramopoulos2011_Alzheimers: upAD in SupTL
ETS1	Avramopoulos2011_Alzheimers: upAD in SupTL
FRAT2	Avramopoulos2011_Alzheimers: upAD in SupTL
MKLN1	Avramopoulos2011_Alzheimers: upAD in SupTL
TRAM1	Avramopoulos2011_Alzheimers: upAD in SupTL
RBM4B	Avramopoulos2011_Alzheimers: upAD in SupTL
IVNS1ABP	Avramopoulos2011_Alzheimers: upAD in SupTL
MSN	Avramopoulos2011_Alzheimers: upAD in SupTL
SMARCC1	Avramopoulos2011_Alzheimers: upAD in SupTL
ID3	Avramopoulos2011_Alzheimers: upAD in SupTL
STAT5B	Avramopoulos2011_Alzheimers: upAD in SupTL
MGST2	Avramopoulos2011_Alzheimers: upAD in SupTL
LZTS2	Avramopoulos2011_Alzheimers: upAD in SupTL
RPS6KA2	Avramopoulos2011_Alzheimers: upAD in SupTL
PARP4	Avramopoulos2011_Alzheimers: upAD in SupTL
TNRC6B	Avramopoulos2011_Alzheimers: upAD in SupTL
HELZ	Avramopoulos2011_Alzheimers: upAD in SupTL
HBP1	Avramopoulos2011_Alzheimers: upAD in SupTL
MTF1	Avramopoulos2011_Alzheimers: upAD in SupTL
CHD4	Avramopoulos2011_Alzheimers: upAD in SupTL
ZCCHC14	Avramopoulos2011_Alzheimers: upAD in SupTL
AP3B1	Avramopoulos2011_Alzheimers: upAD in SupTL
RHOG	Avramopoulos2011_Alzheimers: upAD in SupTL
E2F6	Avramopoulos2011_Alzheimers: upAD in SupTL
SEMA6A	Avramopoulos2011_Alzheimers: upAD in SupTL
VAMP3	Avramopoulos2011_Alzheimers: upAD in SupTL
CORO1B	Avramopoulos2011_Alzheimers: upAD in SupTL
PPP1CC	Avramopoulos2011_Alzheimers: upAD in SupTL
ZBED1	Avramopoulos2011_Alzheimers: upAD in SupTL
GOLGA1	Avramopoulos2011_Alzheimers: upAD in SupTL
PBX3	Avramopoulos2011_Alzheimers: upAD in SupTL
GOLGA7	Avramopoulos2011_Alzheimers: upAD in SupTL
EFHD1	Avramopoulos2011_Alzheimers: upAD in SupTL
ZAK	Avramopoulos2011_Alzheimers: upAD in SupTL
ARHGAP17	Avramopoulos2011_Alzheimers: upAD in SupTL
PREX1	Avramopoulos2011_Alzheimers: upAD in SupTL
SUPT6H	Avramopoulos2011_Alzheimers: upAD in SupTL
GRAMD1A	Avramopoulos2011_Alzheimers: upAD in SupTL
DNALI1	Avramopoulos2011_Alzheimers: upAD in SupTL
DIP2C	Avramopoulos2011_Alzheimers: upAD in SupTL
MYLIP	Avramopoulos2011_Alzheimers: upAD in SupTL
FZD4	Avramopoulos2011_Alzheimers: upAD in SupTL
ABL1	Avramopoulos2011_Alzheimers: upAD in SupTL
MAPK4	Avramopoulos2011_Alzheimers: upAD in SupTL
AKT1	Avramopoulos2011_Alzheimers: upAD in SupTL
MTA2	Avramopoulos2011_Alzheimers: upAD in SupTL
BTG1	Avramopoulos2011_Alzheimers: upAD in SupTL
HDGF	Avramopoulos2011_Alzheimers: upAD in SupTL
CSK	Avramopoulos2011_Alzheimers: upAD in SupTL
BBX	Avramopoulos2011_Alzheimers: upAD in SupTL
RYK	Avramopoulos2011_Alzheimers: upAD in SupTL
POU3F2	Avramopoulos2011_Alzheimers: upAD in SupTL
HIP1	Avramopoulos2011_Alzheimers: upAD in SupTL
PPAP2A	Avramopoulos2011_Alzheimers: upAD in SupTL
RRAGC	Avramopoulos2011_Alzheimers: upAD in SupTL
CRKL	Avramopoulos2011_Alzheimers: upAD in SupTL
GNS	Avramopoulos2011_Alzheimers: upAD in SupTL
DLST	Avramopoulos2011_Alzheimers: upAD in SupTL
CREBBP	Avramopoulos2011_Alzheimers: upAD in SupTL
TMEM87A	Avramopoulos2011_Alzheimers: upAD in SupTL
MYO9A	Avramopoulos2011_Alzheimers: upAD in SupTL
IL13RA1	Avramopoulos2011_Alzheimers: upAD in SupTL
CTNNA1	Avramopoulos2011_Alzheimers: upAD in SupTL
LAMP2	Avramopoulos2011_Alzheimers: upAD in SupTL
TMCC2	Avramopoulos2011_Alzheimers: upAD in SupTL
CLK1	Avramopoulos2011_Alzheimers: upAD in SupTL
KCNJ2	Avramopoulos2011_Alzheimers: upAD in SupTL
APOD	Avramopoulos2011_Alzheimers: upAD in SupTL
SLC6A9	Avramopoulos2011_Alzheimers: upAD in SupTL
KLHL21	Avramopoulos2011_Alzheimers: upAD in SupTL
ZBTB20	Avramopoulos2011_Alzheimers: upAD in SupTL
TPST2	Avramopoulos2011_Alzheimers: upAD in SupTL
DFFA	Avramopoulos2011_Alzheimers: upAD in SupTL
ZNF438	Avramopoulos2011_Alzheimers: upAD in SupTL
SLC35C1	Avramopoulos2011_Alzheimers: upAD in SupTL
DDR1	Avramopoulos2011_Alzheimers: upAD in SupTL
KLHL5	Avramopoulos2011_Alzheimers: upAD in SupTL
ICAM2	Avramopoulos2011_Alzheimers: upAD in SupTL
MON1B	Avramopoulos2011_Alzheimers: upAD in SupTL
IFNAR1	Avramopoulos2011_Alzheimers: upAD in SupTL
SLCO4A1	Avramopoulos2011_Alzheimers: upAD in SupTL
LEF1	Avramopoulos2011_Alzheimers: upAD in SupTL
KLF13	Avramopoulos2011_Alzheimers: upAD in SupTL
SLTM	Avramopoulos2011_Alzheimers: upAD in SupTL
SLC6A12	Avramopoulos2011_Alzheimers: upAD in SupTL
DPF2	Avramopoulos2011_Alzheimers: upAD in SupTL
ABLIM1	Avramopoulos2011_Alzheimers: upAD in SupTL
RASSF2	Avramopoulos2011_Alzheimers: upAD in SupTL
EPB41L2	Avramopoulos2011_Alzheimers: upAD in SupTL
PPFIA1	Avramopoulos2011_Alzheimers: upAD in SupTL
ZNF319	Avramopoulos2011_Alzheimers: upAD in SupTL
IGF2R	Avramopoulos2011_Alzheimers: upAD in SupTL
LTBP3	Avramopoulos2011_Alzheimers: upAD in SupTL
LRP4	Avramopoulos2011_Alzheimers: upAD in SupTL
ANKS1A	Avramopoulos2011_Alzheimers: upAD in SupTL
LRRC1	Avramopoulos2011_Alzheimers: upAD in SupTL
PARP9	Avramopoulos2011_Alzheimers: upAD in SupTL
SMAD4	Avramopoulos2011_Alzheimers: upAD in SupTL
ACTL6A	Avramopoulos2011_Alzheimers: upAD in SupTL
NKX2-2	Avramopoulos2011_Alzheimers: upAD in SupTL
PHACTR3	Avramopoulos2011_Alzheimers: upAD in SupTL
IFI16	Avramopoulos2011_Alzheimers: upAD in SupTL
RXRA	Avramopoulos2011_Alzheimers: upAD in SupTL
GTF3C5	Avramopoulos2011_Alzheimers: upAD in SupTL
ACIN1	Avramopoulos2011_Alzheimers: upAD in SupTL
MYH9	Avramopoulos2011_Alzheimers: upAD in SupTL
UNG	Avramopoulos2011_Alzheimers: upAD in SupTL
RNF130	Avramopoulos2011_Alzheimers: upAD in SupTL
KIF13B	Avramopoulos2011_Alzheimers: upAD in SupTL
TMEM43	Avramopoulos2011_Alzheimers: upAD in SupTL
MBP	Avramopoulos2011_Alzheimers: upAD in SupTL
HLA-E	Avramopoulos2011_Alzheimers: upAD in SupTL
NAP1L4	Avramopoulos2011_Alzheimers: upAD in SupTL
WASF2	Avramopoulos2011_Alzheimers: upAD in SupTL
RFNG	Avramopoulos2011_Alzheimers: upAD in SupTL
VAT1	Avramopoulos2011_Alzheimers: upAD in SupTL
SASH1	Avramopoulos2011_Alzheimers: upAD in SupTL
COMMD7	Avramopoulos2011_Alzheimers: upAD in SupTL
ITPR3	Avramopoulos2011_Alzheimers: upAD in SupTL
LGALS3BP	Avramopoulos2011_Alzheimers: upAD in SupTL
SOX10	Avramopoulos2011_Alzheimers: upAD in SupTL
MIS12	Avramopoulos2011_Alzheimers: upAD in SupTL
POLDIP3	Avramopoulos2011_Alzheimers: upAD in SupTL
LLGL1	Avramopoulos2011_Alzheimers: upAD in SupTL
CREB3L2	Avramopoulos2011_Alzheimers: upAD in SupTL
DDX23	Avramopoulos2011_Alzheimers: upAD in SupTL
SLCO2B1	Avramopoulos2011_Alzheimers: upAD in SupTL
HSPA2	Avramopoulos2011_Alzheimers: upAD in SupTL
GIMAP7	Avramopoulos2011_Alzheimers: upAD in SupTL
TAF4	Avramopoulos2011_Alzheimers: upAD in SupTL
ITPKB	Avramopoulos2011_Alzheimers: upAD in SupTL
CEP350	Avramopoulos2011_Alzheimers: upAD in SupTL
NENF	Avramopoulos2011_Alzheimers: upAD in SupTL
WDR20	Avramopoulos2011_Alzheimers: upAD in SupTL
AHNAK	Avramopoulos2011_Alzheimers: upAD in SupTL
RAVER1	Avramopoulos2011_Alzheimers: upAD in SupTL
CLCA4	Avramopoulos2011_Alzheimers: upAD in SupTL
C1QTNF5	Avramopoulos2011_Alzheimers: upAD in SupTL
DNM2	Avramopoulos2011_Alzheimers: upAD in SupTL
ARID1A	Avramopoulos2011_Alzheimers: upAD in SupTL
CALD1	Avramopoulos2011_Alzheimers: upAD in SupTL
CDC42BPB	Avramopoulos2011_Alzheimers: upAD in SupTL
SERBP1	Avramopoulos2011_Alzheimers: upAD in SupTL
CRK	Avramopoulos2011_Alzheimers: upAD in SupTL
DDIT4L	Avramopoulos2011_Alzheimers: upAD in SupTL
POMT2	Avramopoulos2011_Alzheimers: upAD in SupTL
PHB	Avramopoulos2011_Alzheimers: upAD in SupTL
TOB1	Avramopoulos2011_Alzheimers: upAD in SupTL
IGSF11	Avramopoulos2011_Alzheimers: upAD in SupTL
TMEM2	Avramopoulos2011_Alzheimers: upAD in SupTL
ZNF609	Avramopoulos2011_Alzheimers: upAD in SupTL
OXSR1	Avramopoulos2011_Alzheimers: upAD in SupTL
NECAP2	Avramopoulos2011_Alzheimers: upAD in SupTL
RHOU	Avramopoulos2011_Alzheimers: upAD in SupTL
SSH2	Avramopoulos2011_Alzheimers: upAD in SupTL
ABCA8	Avramopoulos2011_Alzheimers: upAD in SupTL
DPYSL2	Avramopoulos2011_Alzheimers: upAD in SupTL
RDX	Avramopoulos2011_Alzheimers: upAD in SupTL
TEAD2	Avramopoulos2011_Alzheimers: upAD in SupTL
STIP1	Avramopoulos2011_Alzheimers: upAD in SupTL
TNIP2	Avramopoulos2011_Alzheimers: upAD in SupTL
CNOT6	Avramopoulos2011_Alzheimers: upAD in SupTL
SLC44A1	Avramopoulos2011_Alzheimers: upAD in SupTL
SOX13	Avramopoulos2011_Alzheimers: upAD in SupTL
CDR2L	Avramopoulos2011_Alzheimers: upAD in SupTL
SLMAP	Avramopoulos2011_Alzheimers: upAD in SupTL
CDK2AP2	Avramopoulos2011_Alzheimers: upAD in SupTL
LRP10	Avramopoulos2011_Alzheimers: upAD in SupTL
MBD6	Avramopoulos2011_Alzheimers: upAD in SupTL
ZIC2	Avramopoulos2011_Alzheimers: upAD in SupTL
SPR	Avramopoulos2011_Alzheimers: upAD in SupTL
ZNF621	Avramopoulos2011_Alzheimers: upAD in SupTL
PIGM	Avramopoulos2011_Alzheimers: upAD in SupTL
ZNF395	Avramopoulos2011_Alzheimers: upAD in SupTL
SH3BP4	Avramopoulos2011_Alzheimers: upAD in SupTL
DIAPH1	Avramopoulos2011_Alzheimers: upAD in SupTL
ITGB2	Avramopoulos2011_Alzheimers: upAD in SupTL
IPO8	Avramopoulos2011_Alzheimers: upAD in SupTL
FAM84B	Avramopoulos2011_Alzheimers: upAD in SupTL
YAP1	Avramopoulos2011_Alzheimers: upAD in SupTL
BFAR	Avramopoulos2011_Alzheimers: upAD in SupTL
DDIT4	Avramopoulos2011_Alzheimers: upAD in SupTL
LSS	Avramopoulos2011_Alzheimers: upAD in SupTL
COBLL1	Avramopoulos2011_Alzheimers: upAD in SupTL
NPC1	Avramopoulos2011_Alzheimers: upAD in SupTL
CHIC2	Avramopoulos2011_Alzheimers: upAD in SupTL
CHD9	Avramopoulos2011_Alzheimers: upAD in SupTL
CDK5RAP2	Avramopoulos2011_Alzheimers: upAD in SupTL
LTBR	Avramopoulos2011_Alzheimers: upAD in SupTL
ARHGEF18	Avramopoulos2011_Alzheimers: upAD in SupTL
SPAG9	Avramopoulos2011_Alzheimers: upAD in SupTL
PCF11	Avramopoulos2011_Alzheimers: upAD in SupTL
NAP1L1	Avramopoulos2011_Alzheimers: upAD in SupTL
WNK1	Avramopoulos2011_Alzheimers: upAD in SupTL
NFE2L1	Avramopoulos2011_Alzheimers: upAD in SupTL
CHD1	Avramopoulos2011_Alzheimers: upAD in SupTL
CHD7	Avramopoulos2011_Alzheimers: upAD in SupTL
TP53INP1	Avramopoulos2011_Alzheimers: upAD in SupTL
AGPAT3	Avramopoulos2011_Alzheimers: upAD in SupTL
PPP4R1	Avramopoulos2011_Alzheimers: upAD in SupTL
CDH19	Avramopoulos2011_Alzheimers: upAD in SupTL
ANKRD40	Avramopoulos2011_Alzheimers: upAD in SupTL
KLF15	Avramopoulos2011_Alzheimers: upAD in SupTL
ABHD4	Avramopoulos2011_Alzheimers: upAD in SupTL
TCFL5	Avramopoulos2011_Alzheimers: upAD in SupTL
GAB2	Avramopoulos2011_Alzheimers: upAD in SupTL
SGPL1	Avramopoulos2011_Alzheimers: upAD in SupTL
PDK4	Avramopoulos2011_Alzheimers: upAD in SupTL
AK2	Avramopoulos2011_Alzheimers: upAD in SupTL
MAFB	Avramopoulos2011_Alzheimers: upAD in SupTL
ZNF398	Avramopoulos2011_Alzheimers: upAD in SupTL
ANGPT2	Avramopoulos2011_Alzheimers: upAD in SupTL
RBM22	Avramopoulos2011_Alzheimers: upAD in SupTL
DCTN5	Avramopoulos2011_Alzheimers: upAD in SupTL
PNPLA2	Avramopoulos2011_Alzheimers: upAD in SupTL
TJP2	Avramopoulos2011_Alzheimers: upAD in SupTL
TNFRSF1A	Avramopoulos2011_Alzheimers: upAD in SupTL
LITAF	Avramopoulos2011_Alzheimers: upAD in SupTL
EEF2K	Avramopoulos2011_Alzheimers: upAD in SupTL
ARHGEF7	Avramopoulos2011_Alzheimers: upAD in SupTL
CEP135	Avramopoulos2011_Alzheimers: upAD in SupTL
TGFBR3	Avramopoulos2011_Alzheimers: upAD in SupTL
DIP2B	Avramopoulos2011_Alzheimers: upAD in SupTL
EMP3	Avramopoulos2011_Alzheimers: upAD in SupTL
CRB2	Avramopoulos2011_Alzheimers: upAD in SupTL
MSRB3	Avramopoulos2011_Alzheimers: upAD in SupTL
SALL2	Avramopoulos2011_Alzheimers: upAD in SupTL
ST3GAL1	Avramopoulos2011_Alzheimers: upAD in SupTL
CASC3	Avramopoulos2011_Alzheimers: upAD in SupTL
NPC2	Avramopoulos2011_Alzheimers: upAD in SupTL
IKBKB	Avramopoulos2011_Alzheimers: upAD in SupTL
TXNIP	Avramopoulos2011_Alzheimers: upAD in SupTL
LAYN	Avramopoulos2011_Alzheimers: upAD in SupTL
EFNA1	Avramopoulos2011_Alzheimers: upAD in SupTL
PHYHD1	Avramopoulos2011_Alzheimers: upAD in SupTL
ZNF22	Avramopoulos2011_Alzheimers: upAD in SupTL
RIPK1	Avramopoulos2011_Alzheimers: upAD in SupTL
YIPF6	Avramopoulos2011_Alzheimers: upAD in SupTL
BAZ2B	Avramopoulos2011_Alzheimers: upAD in SupTL
ZNF664	Avramopoulos2011_Alzheimers: upAD in SupTL
FMNL2	Avramopoulos2011_Alzheimers: upAD in SupTL
RAB5B	Avramopoulos2011_Alzheimers: upAD in SupTL
CYP27A1	Avramopoulos2011_Alzheimers: upAD in SupTL
PLXNB1	Avramopoulos2011_Alzheimers: upAD in SupTL
AXIN1	Avramopoulos2011_Alzheimers: upAD in SupTL
FSTL1	Avramopoulos2011_Alzheimers: upAD in SupTL
STX16	Avramopoulos2011_Alzheimers: upAD in SupTL
MAPKAPK2	Avramopoulos2011_Alzheimers: upAD in SupTL
CYBA	Avramopoulos2011_Alzheimers: upAD in SupTL
ESRRA	Avramopoulos2011_Alzheimers: upAD in SupTL
DERL2	Avramopoulos2011_Alzheimers: upAD in SupTL
PURA	Avramopoulos2011_Alzheimers: upAD in SupTL
SHMT1	Avramopoulos2011_Alzheimers: upAD in SupTL
SLC27A6	Avramopoulos2011_Alzheimers: upAD in SupTL
ROM1	Avramopoulos2011_Alzheimers: upAD in SupTL
NFE2L2	Avramopoulos2011_Alzheimers: upAD in SupTL
SP1	Avramopoulos2011_Alzheimers: upAD in SupTL
TPR	Avramopoulos2011_Alzheimers: upAD in SupTL
H2AFX	Avramopoulos2011_Alzheimers: upAD in SupTL
AXIN2	Avramopoulos2011_Alzheimers: upAD in SupTL
SLC39A11	Avramopoulos2011_Alzheimers: upAD in SupTL
SAV1	Avramopoulos2011_Alzheimers: upAD in SupTL
OGDH	Avramopoulos2011_Alzheimers: upAD in SupTL
E2F4	Avramopoulos2011_Alzheimers: upAD in SupTL
TGM2	Avramopoulos2011_Alzheimers: upAD in SupTL
EP300	Avramopoulos2011_Alzheimers: upAD in SupTL
GNG7	Avramopoulos2011_Alzheimers: upAD in SupTL
CA2	Avramopoulos2011_Alzheimers: upAD in SupTL
CLDND1	Avramopoulos2011_Alzheimers: upAD in SupTL
MT1X	Avramopoulos2011_Alzheimers: upAD in SupTL
IQGAP1	Avramopoulos2011_Alzheimers: upAD in SupTL
BCAR3	Avramopoulos2011_Alzheimers: upAD in SupTL
STX10	Avramopoulos2011_Alzheimers: upAD in SupTL
PIGA	Avramopoulos2011_Alzheimers: upAD in SupTL
EXOSC7	Avramopoulos2011_Alzheimers: upAD in SupTL
GRAMD3	Avramopoulos2011_Alzheimers: upAD in SupTL
SEC14L1	Avramopoulos2011_Alzheimers: upAD in SupTL
ZFP91	Avramopoulos2011_Alzheimers: upAD in SupTL
LDLR	Avramopoulos2011_Alzheimers: upAD in SupTL
SDCCAG3	Avramopoulos2011_Alzheimers: upAD in SupTL
ELOVL1	Avramopoulos2011_Alzheimers: upAD in SupTL
UCK1	Avramopoulos2011_Alzheimers: upAD in SupTL
STARD13	Avramopoulos2011_Alzheimers: upAD in SupTL
GYPC	Avramopoulos2011_Alzheimers: upAD in SupTL
ARHGEF6	Avramopoulos2011_Alzheimers: upAD in SupTL
ZBTB40	Avramopoulos2011_Alzheimers: upAD in SupTL
BCL6	Avramopoulos2011_Alzheimers: upAD in SupTL
ZFAND3	Avramopoulos2011_Alzheimers: upAD in SupTL
RICTOR	Avramopoulos2011_Alzheimers: upAD in SupTL
TRIM26	Avramopoulos2011_Alzheimers: upAD in SupTL
AIP	Avramopoulos2011_Alzheimers: upAD in SupTL
PLAGL2	Avramopoulos2011_Alzheimers: upAD in SupTL
MLLT6	Avramopoulos2011_Alzheimers: upAD in SupTL
CLDN12	Avramopoulos2011_Alzheimers: upAD in SupTL
PAPOLA	Avramopoulos2011_Alzheimers: upAD in SupTL
HSP90AA1	Avramopoulos2011_Alzheimers: upAD in SupTL
RIN2	Avramopoulos2011_Alzheimers: upAD in SupTL
HERPUD1	Avramopoulos2011_Alzheimers: upAD in SupTL
PLOD2	Avramopoulos2011_Alzheimers: upAD in SupTL
RAB3GAP1	Avramopoulos2011_Alzheimers: upAD in SupTL
PRKCH	Avramopoulos2011_Alzheimers: upAD in SupTL
PDGFRB	Avramopoulos2011_Alzheimers: upAD in SupTL
SF3B3	Avramopoulos2011_Alzheimers: upAD in SupTL
COLEC12	Avramopoulos2011_Alzheimers: upAD in SupTL
LIFR	Avramopoulos2011_Alzheimers: upAD in SupTL
ZNF35	Avramopoulos2011_Alzheimers: upAD in SupTL
RGMA	Avramopoulos2011_Alzheimers: upAD in SupTL
PLCE1	Avramopoulos2011_Alzheimers: upAD in SupTL
DYSF	Avramopoulos2011_Alzheimers: upAD in SupTL
ADARB2	Avramopoulos2011_Alzheimers: upAD in SupTL
TACC1	Avramopoulos2011_Alzheimers: upAD in SupTL
LHFPL2	Avramopoulos2011_Alzheimers: upAD in SupTL
DVL3	Avramopoulos2011_Alzheimers: upAD in SupTL
PLEKHH3	Avramopoulos2011_Alzheimers: upAD in SupTL
TAF15	Avramopoulos2011_Alzheimers: upAD in SupTL
DUSP1	Avramopoulos2011_Alzheimers: upAD in SupTL
PTTG1IP	Avramopoulos2011_Alzheimers: upAD in SupTL
TMEM123	Avramopoulos2011_Alzheimers: upAD in SupTL
STAT5A	Avramopoulos2011_Alzheimers: upAD in SupTL
SEC24C	Avramopoulos2011_Alzheimers: upAD in SupTL
TAX1BP3	Avramopoulos2011_Alzheimers: upAD in SupTL
DNAJB1	Avramopoulos2011_Alzheimers: upAD in SupTL
SEC61A1	Avramopoulos2011_Alzheimers: upAD in SupTL
PACS2	Avramopoulos2011_Alzheimers: upAD in SupTL
LASP1	Avramopoulos2011_Alzheimers: upAD in SupTL
ASXL2	Avramopoulos2011_Alzheimers: upAD in SupTL
JUP	Avramopoulos2011_Alzheimers: upAD in SupTL
TFIP11	Avramopoulos2011_Alzheimers: upAD in SupTL
MVP	Avramopoulos2011_Alzheimers: upAD in SupTL
PPP2R2A	Avramopoulos2011_Alzheimers: upAD in SupTL
THOC2	Avramopoulos2011_Alzheimers: upAD in SupTL
ZCCHC3	Avramopoulos2011_Alzheimers: upAD in SupTL
PRPSAP1	Avramopoulos2011_Alzheimers: upAD in SupTL
NCOA4	Avramopoulos2011_Alzheimers: upAD in SupTL
SSRP1	Avramopoulos2011_Alzheimers: upAD in SupTL
ASCL1	Avramopoulos2011_Alzheimers: upAD in SupTL
ARIH2	Avramopoulos2011_Alzheimers: upAD in SupTL
PTPN23	Avramopoulos2011_Alzheimers: upAD in SupTL
SNX27	Avramopoulos2011_Alzheimers: upAD in SupTL
AEBP1	Avramopoulos2011_Alzheimers: upAD in SupTL
GNB3	Avramopoulos2011_Alzheimers: upAD in SupTL
ZHX1	Avramopoulos2011_Alzheimers: upAD in SupTL
EIF4G1	Avramopoulos2011_Alzheimers: upAD in SupTL
ZDHHC11	Avramopoulos2011_Alzheimers: upAD in SupTL
FGR	Avramopoulos2011_Alzheimers: upAD in SupTL
STARD10	Avramopoulos2011_Alzheimers: upAD in SupTL
MORC2	Avramopoulos2011_Alzheimers: upAD in SupTL
APH1A	Avramopoulos2011_Alzheimers: upAD in SupTL
HCLS1	Avramopoulos2011_Alzheimers: upAD in SupTL
EXOSC1	Avramopoulos2011_Alzheimers: upAD in SupTL
PHF21A	Avramopoulos2011_Alzheimers: upAD in SupTL
SMA4	Avramopoulos2011_Alzheimers: upAD in SupTL
CHST3	Avramopoulos2011_Alzheimers: upAD in SupTL
PLD2	Avramopoulos2011_Alzheimers: upAD in SupTL
HCP5	Avramopoulos2011_Alzheimers: upAD in SupTL
PTGS1	Avramopoulos2011_Alzheimers: upAD in SupTL
ZMPSTE24	Avramopoulos2011_Alzheimers: upAD in SupTL
RAB10	Avramopoulos2011_Alzheimers: upAD in SupTL
GIMAP4	Avramopoulos2011_Alzheimers: upAD in SupTL
ANXA5	Avramopoulos2011_Alzheimers: upAD in SupTL
ACSL5	Avramopoulos2011_Alzheimers: upAD in SupTL
FNBP1	Avramopoulos2011_Alzheimers: upAD in SupTL
SEPP1	Avramopoulos2011_Alzheimers: upAD in SupTL
MAPRE1	Avramopoulos2011_Alzheimers: upAD in SupTL
INPPL1	Avramopoulos2011_Alzheimers: upAD in SupTL
C1QC	Avramopoulos2011_Alzheimers: upAD in SupTL
KLK6	Avramopoulos2011_Alzheimers: upAD in SupTL
SLC14A1	Avramopoulos2011_Alzheimers: upAD in SupTL
TCF12	Avramopoulos2011_Alzheimers: upAD in SupTL
DDX17	Avramopoulos2011_Alzheimers: upAD in SupTL
RAI14	Avramopoulos2011_Alzheimers: upAD in SupTL
RNASEH1	Avramopoulos2011_Alzheimers: upAD in SupTL
PCM1	Avramopoulos2011_Alzheimers: upAD in SupTL
BSG	Avramopoulos2011_Alzheimers: upAD in SupTL
BCL2L1	Avramopoulos2011_Alzheimers: upAD in SupTL
TRIM8	Avramopoulos2011_Alzheimers: upAD in SupTL
ATG4C	Avramopoulos2011_Alzheimers: upAD in SupTL
LRRFIP2	Avramopoulos2011_Alzheimers: upAD in SupTL
ADAMTS1	Avramopoulos2011_Alzheimers: upAD in SupTL
QKI	Avramopoulos2011_Alzheimers: upAD in SupTL
RAF1	Avramopoulos2011_Alzheimers: upAD in SupTL
ITSN1	Avramopoulos2011_Alzheimers: upAD in SupTL
ENAH	Avramopoulos2011_Alzheimers: upAD in SupTL
PLEKHF1	Avramopoulos2011_Alzheimers: upAD in SupTL
SLC44A1	Avramopoulos2011_Alzheimers: upAD in SupTL
CMTM3	Avramopoulos2011_Alzheimers: upAD in SupTL
BAG3	Avramopoulos2011_Alzheimers: upAD in SupTL
ZNF615	Avramopoulos2011_Alzheimers: upAD in SupTL
IFI27	Colangelo_Alzheimers:downAD in CA1
ADAM9	Colangelo_Alzheimers:downAD in CA1
BDNF	Colangelo_Alzheimers:downAD in CA1
SYN1	Colangelo_Alzheimers:downAD in CA1
SLIT2	Colangelo_Alzheimers:downAD in CA1
CSPG5	Colangelo_Alzheimers:downAD in CA1
STAT1	Colangelo_Alzheimers:downAD in CA1
NFKBIA	Colangelo_Alzheimers:downAD in CA1
MTF1	Colangelo_Alzheimers:downAD in CA1
SYP	Colangelo_Alzheimers:downAD in CA1
MT3	Colangelo_Alzheimers:downAD in CA1
DAXX	Colangelo_Alzheimers:upAD in CA1
PLA2G4A	Colangelo_Alzheimers:upAD in CA1
PDCD5	Colangelo_Alzheimers:upAD in CA1
NFKB1	Colangelo_Alzheimers:upAD in CA1
FAS	Colangelo_Alzheimers:upAD in CA1
APP	Colangelo_Alzheimers:upAD in CA1
CTSC	Colangelo_Alzheimers:upAD in CA1
CEBPB	Colangelo_Alzheimers:upAD in CA1
IL1B	Colangelo_Alzheimers:upAD in CA1
TNFAIP2	Colangelo_Alzheimers:upAD in CA1
CD83	Colangelo_Alzheimers:upAD in CA1
RTEL1	Colangelo_Alzheimers:upAD in CA1
NFKB2	Colangelo_Alzheimers:upAD in CA1
CCL2	Colangelo_Alzheimers:upAD in CA1
PTGS2	Colangelo_Alzheimers:upAD in CA1
ERBB2	Colangelo_Alzheimers:upAD in CA1
AAMP	DownWithAlzheimers_Liang_HIP
AARS	DownWithAlzheimers_Liang_HIP
AASDHPPT	DownWithAlzheimers_Liang_HIP
AATF	DownWithAlzheimers_Liang_HIP
ABCA3	DownWithAlzheimers_Liang_HIP
ABCA5	DownWithAlzheimers_Liang_HIP
ABCB6	DownWithAlzheimers_Liang_HIP
ABCC5	DownWithAlzheimers_Liang_HIP
ABCC5	DownWithAlzheimers_Liang_HIP
ABHD2	DownWithAlzheimers_Liang_HIP
ABHD6	DownWithAlzheimers_Liang_HIP
ABL2	DownWithAlzheimers_Liang_HIP
ABLIM1	DownWithAlzheimers_Liang_HIP
ABR	DownWithAlzheimers_Liang_HIP
ACAA1	DownWithAlzheimers_Liang_HIP
ACACA	DownWithAlzheimers_Liang_HIP
ACAD8	DownWithAlzheimers_Liang_HIP
ACAT2	DownWithAlzheimers_Liang_HIP
ACO1	DownWithAlzheimers_Liang_HIP
ACO2	DownWithAlzheimers_Liang_HIP
ACOT2	DownWithAlzheimers_Liang_HIP
ACOT7	DownWithAlzheimers_Liang_HIP
ACOT8	DownWithAlzheimers_Liang_HIP
ACOX1	DownWithAlzheimers_Liang_HIP
ACP1	DownWithAlzheimers_Liang_HIP
ACP2	DownWithAlzheimers_Liang_HIP
ACSL1	DownWithAlzheimers_Liang_HIP
ACSL3	DownWithAlzheimers_Liang_HIP
ACSL3	DownWithAlzheimers_Liang_HIP
ACSL6	DownWithAlzheimers_Liang_HIP
ACSL6	DownWithAlzheimers_Liang_HIP
ACTB	DownWithAlzheimers_Liang_HIP
ACTB	DownWithAlzheimers_Liang_HIP
ACTB	DownWithAlzheimers_Liang_HIP
ACTB	DownWithAlzheimers_Liang_HIP
ACTB	DownWithAlzheimers_Liang_HIP
ACTG1	DownWithAlzheimers_Liang_HIP
ACTG1	DownWithAlzheimers_Liang_HIP
ACTG1	DownWithAlzheimers_Liang_HIP
ACTG1	DownWithAlzheimers_Liang_HIP
ACTG1	DownWithAlzheimers_Liang_HIP
ACTG1	DownWithAlzheimers_Liang_HIP
ACTG1	DownWithAlzheimers_Liang_HIP
ACTG1	DownWithAlzheimers_Liang_HIP
ACTG1	DownWithAlzheimers_Liang_HIP
ACTN2	DownWithAlzheimers_Liang_HIP
ACTR10	DownWithAlzheimers_Liang_HIP
ACTR1A	DownWithAlzheimers_Liang_HIP
ACTR1A	DownWithAlzheimers_Liang_HIP
ACTR1B	DownWithAlzheimers_Liang_HIP
ACTR8	DownWithAlzheimers_Liang_HIP
ACVR1C	DownWithAlzheimers_Liang_HIP
ACYP1	DownWithAlzheimers_Liang_HIP
ACYP2	DownWithAlzheimers_Liang_HIP
ADAM17	DownWithAlzheimers_Liang_HIP
ADAM22	DownWithAlzheimers_Liang_HIP
ADAM23	DownWithAlzheimers_Liang_HIP
ADAM9	DownWithAlzheimers_Liang_HIP
ADAR	DownWithAlzheimers_Liang_HIP
ADARB1	DownWithAlzheimers_Liang_HIP
ADCY3	DownWithAlzheimers_Liang_HIP
ADCYAP1R1	DownWithAlzheimers_Liang_HIP
ADD1	DownWithAlzheimers_Liang_HIP
ADH5	DownWithAlzheimers_Liang_HIP
ADIPOR1	DownWithAlzheimers_Liang_HIP
ADNP	DownWithAlzheimers_Liang_HIP
ADORA1	DownWithAlzheimers_Liang_HIP
ADPGK	DownWithAlzheimers_Liang_HIP
ADSL	DownWithAlzheimers_Liang_HIP
ADSL	DownWithAlzheimers_Liang_HIP
AFG3L2	DownWithAlzheimers_Liang_HIP
AGPAT1	DownWithAlzheimers_Liang_HIP
AGPAT1	DownWithAlzheimers_Liang_HIP
AGPAT3	DownWithAlzheimers_Liang_HIP
AGPAT6	DownWithAlzheimers_Liang_HIP
AGPS	DownWithAlzheimers_Liang_HIP
AHCY	DownWithAlzheimers_Liang_HIP
AHSA1	DownWithAlzheimers_Liang_HIP
AK1	DownWithAlzheimers_Liang_HIP
AK5	DownWithAlzheimers_Liang_HIP
AKAP11	DownWithAlzheimers_Liang_HIP
AKAP6	DownWithAlzheimers_Liang_HIP
AKAP9	DownWithAlzheimers_Liang_HIP
AKR1A1	DownWithAlzheimers_Liang_HIP
AKR1B1	DownWithAlzheimers_Liang_HIP
AKT3	DownWithAlzheimers_Liang_HIP
ALAS1	DownWithAlzheimers_Liang_HIP
ALDH3A2	DownWithAlzheimers_Liang_HIP
ALDOA	DownWithAlzheimers_Liang_HIP
ALDOA	DownWithAlzheimers_Liang_HIP
ALDOC	DownWithAlzheimers_Liang_HIP
ALS2	DownWithAlzheimers_Liang_HIP
AMD1	DownWithAlzheimers_Liang_HIP
AMFR	DownWithAlzheimers_Liang_HIP
AMIGO1	DownWithAlzheimers_Liang_HIP
AMPH	DownWithAlzheimers_Liang_HIP
AMZ2	DownWithAlzheimers_Liang_HIP
ANAPC13	DownWithAlzheimers_Liang_HIP
ANAPC5	DownWithAlzheimers_Liang_HIP
ANAPC5	DownWithAlzheimers_Liang_HIP
ANAPC5	DownWithAlzheimers_Liang_HIP
ANK2	DownWithAlzheimers_Liang_HIP
ANKH	DownWithAlzheimers_Liang_HIP
ANKMY2	DownWithAlzheimers_Liang_HIP
ANKRD10	DownWithAlzheimers_Liang_HIP
ANKRD10	DownWithAlzheimers_Liang_HIP
ANKRD10	DownWithAlzheimers_Liang_HIP
ANKRD32	DownWithAlzheimers_Liang_HIP
ANKRD46	DownWithAlzheimers_Liang_HIP
ANP32E	DownWithAlzheimers_Liang_HIP
ANXA6	DownWithAlzheimers_Liang_HIP
ANXA7	DownWithAlzheimers_Liang_HIP
AP1M1	DownWithAlzheimers_Liang_HIP
AP1S2	DownWithAlzheimers_Liang_HIP
AP2A2	DownWithAlzheimers_Liang_HIP
AP2A2	DownWithAlzheimers_Liang_HIP
AP2A2	DownWithAlzheimers_Liang_HIP
AP2A2	DownWithAlzheimers_Liang_HIP
AP2B1	DownWithAlzheimers_Liang_HIP
AP2M1	DownWithAlzheimers_Liang_HIP
AP2S1	DownWithAlzheimers_Liang_HIP
AP2S1	DownWithAlzheimers_Liang_HIP
AP3M2	DownWithAlzheimers_Liang_HIP
AP4B1	DownWithAlzheimers_Liang_HIP
APC	DownWithAlzheimers_Liang_HIP
APEX1	DownWithAlzheimers_Liang_HIP
APLP2	DownWithAlzheimers_Liang_HIP
APLP2	DownWithAlzheimers_Liang_HIP
APLP2	DownWithAlzheimers_Liang_HIP
APOA1BP	DownWithAlzheimers_Liang_HIP
APPBP2	DownWithAlzheimers_Liang_HIP
APTX	DownWithAlzheimers_Liang_HIP
ARCN1	DownWithAlzheimers_Liang_HIP
ARF1	DownWithAlzheimers_Liang_HIP
ARF5	DownWithAlzheimers_Liang_HIP
ARFGEF2	DownWithAlzheimers_Liang_HIP
ARFIP1	DownWithAlzheimers_Liang_HIP
ARHGAP21	DownWithAlzheimers_Liang_HIP
ARHGAP26	DownWithAlzheimers_Liang_HIP
ARHGAP5	DownWithAlzheimers_Liang_HIP
ARHGEF7	DownWithAlzheimers_Liang_HIP
ARHGEF7	DownWithAlzheimers_Liang_HIP
ARHGEF9	DownWithAlzheimers_Liang_HIP
ARID1A	DownWithAlzheimers_Liang_HIP
ARIH1	DownWithAlzheimers_Liang_HIP
ARIH1	DownWithAlzheimers_Liang_HIP
ARL6IP4	DownWithAlzheimers_Liang_HIP
ARL6IP5	DownWithAlzheimers_Liang_HIP
ARMC8	DownWithAlzheimers_Liang_HIP
ARMCX2	DownWithAlzheimers_Liang_HIP
ARMCX4	DownWithAlzheimers_Liang_HIP
ARPC1A	DownWithAlzheimers_Liang_HIP
ARPC3	DownWithAlzheimers_Liang_HIP
ARPC5L	DownWithAlzheimers_Liang_HIP
ARRDC3	DownWithAlzheimers_Liang_HIP
ARV1	DownWithAlzheimers_Liang_HIP
ASAH1	DownWithAlzheimers_Liang_HIP
ASB1	DownWithAlzheimers_Liang_HIP
ASB13	DownWithAlzheimers_Liang_HIP
ASB3	DownWithAlzheimers_Liang_HIP
ASB8	DownWithAlzheimers_Liang_HIP
ASH2L	DownWithAlzheimers_Liang_HIP
ASNS	DownWithAlzheimers_Liang_HIP
ASPH	DownWithAlzheimers_Liang_HIP
ATCAY	DownWithAlzheimers_Liang_HIP
ATF6	DownWithAlzheimers_Liang_HIP
ATG3	DownWithAlzheimers_Liang_HIP
ATG5	DownWithAlzheimers_Liang_HIP
ATIC	DownWithAlzheimers_Liang_HIP
ATOX1	DownWithAlzheimers_Liang_HIP
ATP1A1	DownWithAlzheimers_Liang_HIP
ATP1A3	DownWithAlzheimers_Liang_HIP
ATP1B1	DownWithAlzheimers_Liang_HIP
ATP2A2	DownWithAlzheimers_Liang_HIP
ATP2B2	DownWithAlzheimers_Liang_HIP
ATP2B3	DownWithAlzheimers_Liang_HIP
ATP5A1	DownWithAlzheimers_Liang_HIP
ATP5B	DownWithAlzheimers_Liang_HIP
ATP5C1	DownWithAlzheimers_Liang_HIP
ATP5C1	DownWithAlzheimers_Liang_HIP
ATP5C1	DownWithAlzheimers_Liang_HIP
ATP5F1	DownWithAlzheimers_Liang_HIP
ATP5G2	DownWithAlzheimers_Liang_HIP
ATP5G3	DownWithAlzheimers_Liang_HIP
ATP5G3	DownWithAlzheimers_Liang_HIP
ATP5J	DownWithAlzheimers_Liang_HIP
ATP5J2	DownWithAlzheimers_Liang_HIP
ATP5L	DownWithAlzheimers_Liang_HIP
ATP5L	DownWithAlzheimers_Liang_HIP
ATP5L	DownWithAlzheimers_Liang_HIP
ATP5O	DownWithAlzheimers_Liang_HIP
ATP6AP1	DownWithAlzheimers_Liang_HIP
ATP6V0B	DownWithAlzheimers_Liang_HIP
ATP6V0D1	DownWithAlzheimers_Liang_HIP
ATP6V1B2	DownWithAlzheimers_Liang_HIP
ATP6V1C1	DownWithAlzheimers_Liang_HIP
ATP6V1D	DownWithAlzheimers_Liang_HIP
ATP6V1E1	DownWithAlzheimers_Liang_HIP
ATP6V1F	DownWithAlzheimers_Liang_HIP
ATP6V1G2	DownWithAlzheimers_Liang_HIP
ATP6V1H	DownWithAlzheimers_Liang_HIP
ATP8A2	DownWithAlzheimers_Liang_HIP
ATP9A	DownWithAlzheimers_Liang_HIP
ATPIF1	DownWithAlzheimers_Liang_HIP
ATR	DownWithAlzheimers_Liang_HIP
ATR	DownWithAlzheimers_Liang_HIP
ATRN	DownWithAlzheimers_Liang_HIP
ATRX	DownWithAlzheimers_Liang_HIP
ATXN10	DownWithAlzheimers_Liang_HIP
ATXN10	DownWithAlzheimers_Liang_HIP
AUH	DownWithAlzheimers_Liang_HIP
AURKAIP1	DownWithAlzheimers_Liang_HIP
AURKAIP1	DownWithAlzheimers_Liang_HIP
AZIN1	DownWithAlzheimers_Liang_HIP
B3GALT6	DownWithAlzheimers_Liang_HIP
B3GAT1	DownWithAlzheimers_Liang_HIP
BAALC	DownWithAlzheimers_Liang_HIP
BAALC	DownWithAlzheimers_Liang_HIP
BACE1	DownWithAlzheimers_Liang_HIP
BAG1	DownWithAlzheimers_Liang_HIP
BAG5	DownWithAlzheimers_Liang_HIP
BAG5	DownWithAlzheimers_Liang_HIP
BAZ1B	DownWithAlzheimers_Liang_HIP
BBS2	DownWithAlzheimers_Liang_HIP
BCAP29	DownWithAlzheimers_Liang_HIP
BCAP31	DownWithAlzheimers_Liang_HIP
BCAS2	DownWithAlzheimers_Liang_HIP
BCAT1	DownWithAlzheimers_Liang_HIP
BCCIP	DownWithAlzheimers_Liang_HIP
BCLAF1	DownWithAlzheimers_Liang_HIP
BCLAF1	DownWithAlzheimers_Liang_HIP
BCR	DownWithAlzheimers_Liang_HIP
BID	DownWithAlzheimers_Liang_HIP
BIN1	DownWithAlzheimers_Liang_HIP
BIN1	DownWithAlzheimers_Liang_HIP
BIN1	DownWithAlzheimers_Liang_HIP
BIN1	DownWithAlzheimers_Liang_HIP
BIN1	DownWithAlzheimers_Liang_HIP
BIRC6	DownWithAlzheimers_Liang_HIP
BLCAP	DownWithAlzheimers_Liang_HIP
BLOC1S1	DownWithAlzheimers_Liang_HIP
BLVRA	DownWithAlzheimers_Liang_HIP
BLVRB	DownWithAlzheimers_Liang_HIP
BMPR2	DownWithAlzheimers_Liang_HIP
BPGM	DownWithAlzheimers_Liang_HIP
BRD2	DownWithAlzheimers_Liang_HIP
BRD4	DownWithAlzheimers_Liang_HIP
BRD7	DownWithAlzheimers_Liang_HIP
BRD9	DownWithAlzheimers_Liang_HIP
BRE	DownWithAlzheimers_Liang_HIP
BRMS1L	DownWithAlzheimers_Liang_HIP
BRWD1	DownWithAlzheimers_Liang_HIP
BSN	DownWithAlzheimers_Liang_HIP
BTBD10	DownWithAlzheimers_Liang_HIP
BTF3	DownWithAlzheimers_Liang_HIP
BTF3	DownWithAlzheimers_Liang_HIP
BTN2A1	DownWithAlzheimers_Liang_HIP
BTN2A1	DownWithAlzheimers_Liang_HIP
BTRC	DownWithAlzheimers_Liang_HIP
BUB3	DownWithAlzheimers_Liang_HIP
BZW1	DownWithAlzheimers_Liang_HIP
C10orf35	DownWithAlzheimers_Liang_HIP
C12orf10	DownWithAlzheimers_Liang_HIP
C12orf4	DownWithAlzheimers_Liang_HIP
C12orf4	DownWithAlzheimers_Liang_HIP
C14orf119	DownWithAlzheimers_Liang_HIP
C14orf166	DownWithAlzheimers_Liang_HIP
C14orf2	DownWithAlzheimers_Liang_HIP
C14orf2	DownWithAlzheimers_Liang_HIP
C16orf45	DownWithAlzheimers_Liang_HIP
C1orf115	DownWithAlzheimers_Liang_HIP
C1orf123	DownWithAlzheimers_Liang_HIP
C1orf21	DownWithAlzheimers_Liang_HIP
C1orf43	DownWithAlzheimers_Liang_HIP
C1QBP	DownWithAlzheimers_Liang_HIP
C20orf194	DownWithAlzheimers_Liang_HIP
C20orf24	DownWithAlzheimers_Liang_HIP
C21orf33	DownWithAlzheimers_Liang_HIP
C5orf15	DownWithAlzheimers_Liang_HIP
C6orf120	DownWithAlzheimers_Liang_HIP
C6orf48	DownWithAlzheimers_Liang_HIP
C6orf62	DownWithAlzheimers_Liang_HIP
C6orf62	DownWithAlzheimers_Liang_HIP
C6orf89	DownWithAlzheimers_Liang_HIP
C6orf89	DownWithAlzheimers_Liang_HIP
C8orf33	DownWithAlzheimers_Liang_HIP
CAB39	DownWithAlzheimers_Liang_HIP
CACHD1	DownWithAlzheimers_Liang_HIP
CACNA1E	DownWithAlzheimers_Liang_HIP
CACNB2	DownWithAlzheimers_Liang_HIP
CACNB2	DownWithAlzheimers_Liang_HIP
CADPS	DownWithAlzheimers_Liang_HIP
CADPS	DownWithAlzheimers_Liang_HIP
CALM1	DownWithAlzheimers_Liang_HIP
CALM1	DownWithAlzheimers_Liang_HIP
CALM1	DownWithAlzheimers_Liang_HIP
CALM1	DownWithAlzheimers_Liang_HIP
CALM2	DownWithAlzheimers_Liang_HIP
CALM3	DownWithAlzheimers_Liang_HIP
CAMK2A	DownWithAlzheimers_Liang_HIP
CAMK2B	DownWithAlzheimers_Liang_HIP
CAMK2B	DownWithAlzheimers_Liang_HIP
CAMK2B	DownWithAlzheimers_Liang_HIP
CAMK2B	DownWithAlzheimers_Liang_HIP
CAMKK1	DownWithAlzheimers_Liang_HIP
CAMKK2	DownWithAlzheimers_Liang_HIP
CAMKV	DownWithAlzheimers_Liang_HIP
CAMSAP1	DownWithAlzheimers_Liang_HIP
CAMTA1	DownWithAlzheimers_Liang_HIP
CAND1	DownWithAlzheimers_Liang_HIP
CANX	DownWithAlzheimers_Liang_HIP
CANX	DownWithAlzheimers_Liang_HIP
CANX	DownWithAlzheimers_Liang_HIP
CAP1	DownWithAlzheimers_Liang_HIP
CAPNS1	DownWithAlzheimers_Liang_HIP
CAPZA1	DownWithAlzheimers_Liang_HIP
CAPZA2	DownWithAlzheimers_Liang_HIP
CAST	DownWithAlzheimers_Liang_HIP
CBR4	DownWithAlzheimers_Liang_HIP
CBX1	DownWithAlzheimers_Liang_HIP
CBX6	DownWithAlzheimers_Liang_HIP
CBX6	DownWithAlzheimers_Liang_HIP
CCDC25	DownWithAlzheimers_Liang_HIP
CCDC3	DownWithAlzheimers_Liang_HIP
CCDC6	DownWithAlzheimers_Liang_HIP
CCM2	DownWithAlzheimers_Liang_HIP
CCND2	DownWithAlzheimers_Liang_HIP
CCNDBP1	DownWithAlzheimers_Liang_HIP
CCNL1	DownWithAlzheimers_Liang_HIP
CCT2	DownWithAlzheimers_Liang_HIP
CCT3	DownWithAlzheimers_Liang_HIP
CCT4	DownWithAlzheimers_Liang_HIP
CCT5	DownWithAlzheimers_Liang_HIP
CCT7	DownWithAlzheimers_Liang_HIP
CCT8	DownWithAlzheimers_Liang_HIP
CD200	DownWithAlzheimers_Liang_HIP
CD47	DownWithAlzheimers_Liang_HIP
CD59	DownWithAlzheimers_Liang_HIP
CD9	DownWithAlzheimers_Liang_HIP
CD99L2	DownWithAlzheimers_Liang_HIP
CD99L2	DownWithAlzheimers_Liang_HIP
CDC16	DownWithAlzheimers_Liang_HIP
CDC16	DownWithAlzheimers_Liang_HIP
CDC16	DownWithAlzheimers_Liang_HIP
CDC27	DownWithAlzheimers_Liang_HIP
CDC37L1	DownWithAlzheimers_Liang_HIP
CDC40	DownWithAlzheimers_Liang_HIP
CDC42	DownWithAlzheimers_Liang_HIP
CDC42SE1	DownWithAlzheimers_Liang_HIP
CDC42SE1	DownWithAlzheimers_Liang_HIP
CDC42SE2	DownWithAlzheimers_Liang_HIP
CDK5	DownWithAlzheimers_Liang_HIP
CDK7	DownWithAlzheimers_Liang_HIP
CDS1	DownWithAlzheimers_Liang_HIP
CECR5	DownWithAlzheimers_Liang_HIP
CECR6	DownWithAlzheimers_Liang_HIP
CEPT1	DownWithAlzheimers_Liang_HIP
CERK	DownWithAlzheimers_Liang_HIP
CETN2	DownWithAlzheimers_Liang_HIP
CFDP1	DownWithAlzheimers_Liang_HIP
CGGBP1	DownWithAlzheimers_Liang_HIP
CGRRF1	DownWithAlzheimers_Liang_HIP
CHCHD1	DownWithAlzheimers_Liang_HIP
CHCHD2	DownWithAlzheimers_Liang_HIP
CHCHD6	DownWithAlzheimers_Liang_HIP
CHCHD7	DownWithAlzheimers_Liang_HIP
CHGB	DownWithAlzheimers_Liang_HIP
CHIC1	DownWithAlzheimers_Liang_HIP
CHKA	DownWithAlzheimers_Liang_HIP
CHMP2A	DownWithAlzheimers_Liang_HIP
CHMP2B	DownWithAlzheimers_Liang_HIP
CHMP4B	DownWithAlzheimers_Liang_HIP
CHMP5	DownWithAlzheimers_Liang_HIP
CHN1	DownWithAlzheimers_Liang_HIP
CHN2	DownWithAlzheimers_Liang_HIP
CHRM1	DownWithAlzheimers_Liang_HIP
CHRNB2	DownWithAlzheimers_Liang_HIP
CIB1	DownWithAlzheimers_Liang_HIP
CIRBP	DownWithAlzheimers_Liang_HIP
CIRBP	DownWithAlzheimers_Liang_HIP
CIRH1A	DownWithAlzheimers_Liang_HIP
CKAP5	DownWithAlzheimers_Liang_HIP
CKAP5	DownWithAlzheimers_Liang_HIP
CKB	DownWithAlzheimers_Liang_HIP
CLASP1	DownWithAlzheimers_Liang_HIP
CLASP2	DownWithAlzheimers_Liang_HIP
CLASP2	DownWithAlzheimers_Liang_HIP
CLCN3	DownWithAlzheimers_Liang_HIP
CLCN3	DownWithAlzheimers_Liang_HIP
CLCN4	DownWithAlzheimers_Liang_HIP
CLPP	DownWithAlzheimers_Liang_HIP
CLSTN1	DownWithAlzheimers_Liang_HIP
CLTA	DownWithAlzheimers_Liang_HIP
CLTA	DownWithAlzheimers_Liang_HIP
CLTA	DownWithAlzheimers_Liang_HIP
CLTB	DownWithAlzheimers_Liang_HIP
CLTB	DownWithAlzheimers_Liang_HIP
CLTC	DownWithAlzheimers_Liang_HIP
CNN3	DownWithAlzheimers_Liang_HIP
CNOT2	DownWithAlzheimers_Liang_HIP
CNOT4	DownWithAlzheimers_Liang_HIP
CNTN1	DownWithAlzheimers_Liang_HIP
COASY	DownWithAlzheimers_Liang_HIP
COG1	DownWithAlzheimers_Liang_HIP
COG3	DownWithAlzheimers_Liang_HIP
COIL	DownWithAlzheimers_Liang_HIP
COL4A3BP	DownWithAlzheimers_Liang_HIP
COMMD1	DownWithAlzheimers_Liang_HIP
COMMD3	DownWithAlzheimers_Liang_HIP
COMMD7	DownWithAlzheimers_Liang_HIP
COMMD9	DownWithAlzheimers_Liang_HIP
COPB2	DownWithAlzheimers_Liang_HIP
COPG2	DownWithAlzheimers_Liang_HIP
COPS2	DownWithAlzheimers_Liang_HIP
COPS3	DownWithAlzheimers_Liang_HIP
COPS4	DownWithAlzheimers_Liang_HIP
COPS5	DownWithAlzheimers_Liang_HIP
COPS6	DownWithAlzheimers_Liang_HIP
COPS7A	DownWithAlzheimers_Liang_HIP
COPS8	DownWithAlzheimers_Liang_HIP
COPS8	DownWithAlzheimers_Liang_HIP
COPZ1	DownWithAlzheimers_Liang_HIP
COQ3	DownWithAlzheimers_Liang_HIP
COQ3	DownWithAlzheimers_Liang_HIP
CORO1C	DownWithAlzheimers_Liang_HIP
COTL1	DownWithAlzheimers_Liang_HIP
COX15	DownWithAlzheimers_Liang_HIP
COX4I1	DownWithAlzheimers_Liang_HIP
COX4I1	DownWithAlzheimers_Liang_HIP
COX5B	DownWithAlzheimers_Liang_HIP
COX5B	DownWithAlzheimers_Liang_HIP
COX5B	DownWithAlzheimers_Liang_HIP
COX6B1	DownWithAlzheimers_Liang_HIP
COX6C	DownWithAlzheimers_Liang_HIP
COX7B	DownWithAlzheimers_Liang_HIP
COX7C	DownWithAlzheimers_Liang_HIP
COX8A	DownWithAlzheimers_Liang_HIP
CPD	DownWithAlzheimers_Liang_HIP
CPD	DownWithAlzheimers_Liang_HIP
CPNE1	DownWithAlzheimers_Liang_HIP
CPNE2	DownWithAlzheimers_Liang_HIP
CPNE3	DownWithAlzheimers_Liang_HIP
CPSF3	DownWithAlzheimers_Liang_HIP
CPSF6	DownWithAlzheimers_Liang_HIP
CRBN	DownWithAlzheimers_Liang_HIP
CRBN	DownWithAlzheimers_Liang_HIP
CREG1	DownWithAlzheimers_Liang_HIP
CRELD1	DownWithAlzheimers_Liang_HIP
CRIPT	DownWithAlzheimers_Liang_HIP
CRMP1	DownWithAlzheimers_Liang_HIP
CRY2	DownWithAlzheimers_Liang_HIP
CRYGS	DownWithAlzheimers_Liang_HIP
CRYL1	DownWithAlzheimers_Liang_HIP
CS	DownWithAlzheimers_Liang_HIP
CSDE1	DownWithAlzheimers_Liang_HIP
CSE1L	DownWithAlzheimers_Liang_HIP
CSE1L	DownWithAlzheimers_Liang_HIP
CSNK1A1	DownWithAlzheimers_Liang_HIP
CSNK1A1	DownWithAlzheimers_Liang_HIP
CSNK1A1	DownWithAlzheimers_Liang_HIP
CSNK1D	DownWithAlzheimers_Liang_HIP
CSNK2A2	DownWithAlzheimers_Liang_HIP
CSNK2B	DownWithAlzheimers_Liang_HIP
CSRP2BP	DownWithAlzheimers_Liang_HIP
CTBP1	DownWithAlzheimers_Liang_HIP
CTBP1	DownWithAlzheimers_Liang_HIP
CTNNA2	DownWithAlzheimers_Liang_HIP
CTNNB1	DownWithAlzheimers_Liang_HIP
CTNNBL1	DownWithAlzheimers_Liang_HIP
CTSB	DownWithAlzheimers_Liang_HIP
CTSB	DownWithAlzheimers_Liang_HIP
CUEDC2	DownWithAlzheimers_Liang_HIP
CUL1	DownWithAlzheimers_Liang_HIP
CUL2	DownWithAlzheimers_Liang_HIP
CUL3	DownWithAlzheimers_Liang_HIP
CUL5	DownWithAlzheimers_Liang_HIP
CUTC	DownWithAlzheimers_Liang_HIP
CXorf40B	DownWithAlzheimers_Liang_HIP
CYB561	DownWithAlzheimers_Liang_HIP
CYFIP2	DownWithAlzheimers_Liang_HIP
CYFIP2	DownWithAlzheimers_Liang_HIP
CYHR1	DownWithAlzheimers_Liang_HIP
CYLD	DownWithAlzheimers_Liang_HIP
CYLD	DownWithAlzheimers_Liang_HIP
DAD1	DownWithAlzheimers_Liang_HIP
DAG1	DownWithAlzheimers_Liang_HIP
DAP3	DownWithAlzheimers_Liang_HIP
DAPK1	DownWithAlzheimers_Liang_HIP
DARS	DownWithAlzheimers_Liang_HIP
DAZAP2	DownWithAlzheimers_Liang_HIP
DCTD	DownWithAlzheimers_Liang_HIP
DCTD	DownWithAlzheimers_Liang_HIP
DCTN1	DownWithAlzheimers_Liang_HIP
DCTN2	DownWithAlzheimers_Liang_HIP
DCTN4	DownWithAlzheimers_Liang_HIP
DCTN6	DownWithAlzheimers_Liang_HIP
DCUN1D2	DownWithAlzheimers_Liang_HIP
DCUN1D4	DownWithAlzheimers_Liang_HIP
DCUN1D5	DownWithAlzheimers_Liang_HIP
DDHD1	DownWithAlzheimers_Liang_HIP
DDHD2	DownWithAlzheimers_Liang_HIP
DDIT3	DownWithAlzheimers_Liang_HIP
DDOST	DownWithAlzheimers_Liang_HIP
DDX1	DownWithAlzheimers_Liang_HIP
DDX10	DownWithAlzheimers_Liang_HIP
DDX17	DownWithAlzheimers_Liang_HIP
DDX25	DownWithAlzheimers_Liang_HIP
DDX3X	DownWithAlzheimers_Liang_HIP
DDX41	DownWithAlzheimers_Liang_HIP
DDX42	DownWithAlzheimers_Liang_HIP
DDX49	DownWithAlzheimers_Liang_HIP
DDX5	DownWithAlzheimers_Liang_HIP
DDX5	DownWithAlzheimers_Liang_HIP
DDX50	DownWithAlzheimers_Liang_HIP
DDX56	DownWithAlzheimers_Liang_HIP
DDX6	DownWithAlzheimers_Liang_HIP
DEAF1	DownWithAlzheimers_Liang_HIP
DECR1	DownWithAlzheimers_Liang_HIP
DENR	DownWithAlzheimers_Liang_HIP
DERL2	DownWithAlzheimers_Liang_HIP
DGUOK	DownWithAlzheimers_Liang_HIP
DHCR24	DownWithAlzheimers_Liang_HIP
DHPS	DownWithAlzheimers_Liang_HIP
DHRS7	DownWithAlzheimers_Liang_HIP
DHX15	DownWithAlzheimers_Liang_HIP
DHX15	DownWithAlzheimers_Liang_HIP
DHX29	DownWithAlzheimers_Liang_HIP
DHX30	DownWithAlzheimers_Liang_HIP
DHX30	DownWithAlzheimers_Liang_HIP
DHX36	DownWithAlzheimers_Liang_HIP
DHX9	DownWithAlzheimers_Liang_HIP
DICER1	DownWithAlzheimers_Liang_HIP
DKC1	DownWithAlzheimers_Liang_HIP
DKC1	DownWithAlzheimers_Liang_HIP
DKK3	DownWithAlzheimers_Liang_HIP
DKK3	DownWithAlzheimers_Liang_HIP
DLD	DownWithAlzheimers_Liang_HIP
DLG3	DownWithAlzheimers_Liang_HIP
DMAP1	DownWithAlzheimers_Liang_HIP
DMXL2	DownWithAlzheimers_Liang_HIP
DNAJA2	DownWithAlzheimers_Liang_HIP
DNAJA4	DownWithAlzheimers_Liang_HIP
DNAJB6	DownWithAlzheimers_Liang_HIP
DNAJB6	DownWithAlzheimers_Liang_HIP
DNAJC14	DownWithAlzheimers_Liang_HIP
DNAJC16	DownWithAlzheimers_Liang_HIP
DNAJC19	DownWithAlzheimers_Liang_HIP
DNAJC5	DownWithAlzheimers_Liang_HIP
DNAJC5	DownWithAlzheimers_Liang_HIP
DNAJC7	DownWithAlzheimers_Liang_HIP
DNAJC8	DownWithAlzheimers_Liang_HIP
DNAJC8	DownWithAlzheimers_Liang_HIP
DNM1L	DownWithAlzheimers_Liang_HIP
DNM3	DownWithAlzheimers_Liang_HIP
DOCK10	DownWithAlzheimers_Liang_HIP
DOCK3	DownWithAlzheimers_Liang_HIP
DPP6	DownWithAlzheimers_Liang_HIP
DPP8	DownWithAlzheimers_Liang_HIP
DPYSL2	DownWithAlzheimers_Liang_HIP
DRP2	DownWithAlzheimers_Liang_HIP
DST	DownWithAlzheimers_Liang_HIP
DSTN	DownWithAlzheimers_Liang_HIP
DUSP12	DownWithAlzheimers_Liang_HIP
DYRK4	DownWithAlzheimers_Liang_HIP
DZIP3	DownWithAlzheimers_Liang_HIP
DZIP3	DownWithAlzheimers_Liang_HIP
EAF1	DownWithAlzheimers_Liang_HIP
EBPL	DownWithAlzheimers_Liang_HIP
ECH1	DownWithAlzheimers_Liang_HIP
ECHDC1	DownWithAlzheimers_Liang_HIP
ECHS1	DownWithAlzheimers_Liang_HIP
EDEM1	DownWithAlzheimers_Liang_HIP
EDF1	DownWithAlzheimers_Liang_HIP
EDF1	DownWithAlzheimers_Liang_HIP
EDIL3	DownWithAlzheimers_Liang_HIP
EEF1A1	DownWithAlzheimers_Liang_HIP
EEF1A1	DownWithAlzheimers_Liang_HIP
EEF1A1	DownWithAlzheimers_Liang_HIP
EEF1A1	DownWithAlzheimers_Liang_HIP
EEF1A2	DownWithAlzheimers_Liang_HIP
EEF1B2	DownWithAlzheimers_Liang_HIP
EEF1D	DownWithAlzheimers_Liang_HIP
EEF1E1	DownWithAlzheimers_Liang_HIP
EEF1G	DownWithAlzheimers_Liang_HIP
EEF1G	DownWithAlzheimers_Liang_HIP
EEF1G	DownWithAlzheimers_Liang_HIP
EEF2	DownWithAlzheimers_Liang_HIP
EFTUD2	DownWithAlzheimers_Liang_HIP
EGLN2	DownWithAlzheimers_Liang_HIP
EGR1	DownWithAlzheimers_Liang_HIP
EGR1	DownWithAlzheimers_Liang_HIP
EHD3	DownWithAlzheimers_Liang_HIP
EIF1	DownWithAlzheimers_Liang_HIP
EIF1	DownWithAlzheimers_Liang_HIP
EIF1	DownWithAlzheimers_Liang_HIP
EIF2AK1	DownWithAlzheimers_Liang_HIP
EIF2B1	DownWithAlzheimers_Liang_HIP
EIF2B3	DownWithAlzheimers_Liang_HIP
EIF2B4	DownWithAlzheimers_Liang_HIP
EIF2S1	DownWithAlzheimers_Liang_HIP
EIF2S2	DownWithAlzheimers_Liang_HIP
EIF4A1	DownWithAlzheimers_Liang_HIP
EIF4B	DownWithAlzheimers_Liang_HIP
EIF4E2	DownWithAlzheimers_Liang_HIP
EIF4E3	DownWithAlzheimers_Liang_HIP
EIF4E3	DownWithAlzheimers_Liang_HIP
EIF4ENIF1	DownWithAlzheimers_Liang_HIP
EIF4G1	DownWithAlzheimers_Liang_HIP
EIF4G2	DownWithAlzheimers_Liang_HIP
EIF5	DownWithAlzheimers_Liang_HIP
EIF5	DownWithAlzheimers_Liang_HIP
EIF5	DownWithAlzheimers_Liang_HIP
ELAVL4	DownWithAlzheimers_Liang_HIP
ELF2	DownWithAlzheimers_Liang_HIP
ELL2	DownWithAlzheimers_Liang_HIP
ELMO1	DownWithAlzheimers_Liang_HIP
ELMO2	DownWithAlzheimers_Liang_HIP
ELMOD2	DownWithAlzheimers_Liang_HIP
ELP4	DownWithAlzheimers_Liang_HIP
ENAH	DownWithAlzheimers_Liang_HIP
ENC1	DownWithAlzheimers_Liang_HIP
ENO1	DownWithAlzheimers_Liang_HIP
ENO2	DownWithAlzheimers_Liang_HIP
ENSA	DownWithAlzheimers_Liang_HIP
ENSA	DownWithAlzheimers_Liang_HIP
ENTPD3	DownWithAlzheimers_Liang_HIP
ENTPD6	DownWithAlzheimers_Liang_HIP
ENY2	DownWithAlzheimers_Liang_HIP
EPB41L1	DownWithAlzheimers_Liang_HIP
EPB41L3	DownWithAlzheimers_Liang_HIP
EPDR1	DownWithAlzheimers_Liang_HIP
EPM2AIP1	DownWithAlzheimers_Liang_HIP
EPRS	DownWithAlzheimers_Liang_HIP
ERCC1	DownWithAlzheimers_Liang_HIP
ERCC3	DownWithAlzheimers_Liang_HIP
ERH	DownWithAlzheimers_Liang_HIP
ERO1L	DownWithAlzheimers_Liang_HIP
ERP29	DownWithAlzheimers_Liang_HIP
ESD	DownWithAlzheimers_Liang_HIP
ETF1	DownWithAlzheimers_Liang_HIP
ETFB	DownWithAlzheimers_Liang_HIP
ETFDH	DownWithAlzheimers_Liang_HIP
ETFDH	DownWithAlzheimers_Liang_HIP
ETV5	DownWithAlzheimers_Liang_HIP
EVL	DownWithAlzheimers_Liang_HIP
EXOSC1	DownWithAlzheimers_Liang_HIP
EXOSC7	DownWithAlzheimers_Liang_HIP
EXT2	DownWithAlzheimers_Liang_HIP
EXT2	DownWithAlzheimers_Liang_HIP
EXTL2	DownWithAlzheimers_Liang_HIP
EZH1	DownWithAlzheimers_Liang_HIP
FABP3	DownWithAlzheimers_Liang_HIP
FABP3	DownWithAlzheimers_Liang_HIP
FABP5	DownWithAlzheimers_Liang_HIP
FAF1	DownWithAlzheimers_Liang_HIP
FAF1	DownWithAlzheimers_Liang_HIP
FAHD1	DownWithAlzheimers_Liang_HIP
FAHD2A	DownWithAlzheimers_Liang_HIP
FAM20B	DownWithAlzheimers_Liang_HIP
FAM32A	DownWithAlzheimers_Liang_HIP
FAM49A	DownWithAlzheimers_Liang_HIP
FAM50A	DownWithAlzheimers_Liang_HIP
FAM58A	DownWithAlzheimers_Liang_HIP
FAU	DownWithAlzheimers_Liang_HIP
FBXL5	DownWithAlzheimers_Liang_HIP
FBXO21	DownWithAlzheimers_Liang_HIP
FBXO34	DownWithAlzheimers_Liang_HIP
FBXO38	DownWithAlzheimers_Liang_HIP
FBXO41	DownWithAlzheimers_Liang_HIP
FBXO7	DownWithAlzheimers_Liang_HIP
FBXO9	DownWithAlzheimers_Liang_HIP
FBXW2	DownWithAlzheimers_Liang_HIP
FBXW7	DownWithAlzheimers_Liang_HIP
FDFT1	DownWithAlzheimers_Liang_HIP
FDPS	DownWithAlzheimers_Liang_HIP
FEN1	DownWithAlzheimers_Liang_HIP
FH	DownWithAlzheimers_Liang_HIP
FH	DownWithAlzheimers_Liang_HIP
FHL1	DownWithAlzheimers_Liang_HIP
FHL1	DownWithAlzheimers_Liang_HIP
FHL2	DownWithAlzheimers_Liang_HIP
FHOD3	DownWithAlzheimers_Liang_HIP
FIBP	DownWithAlzheimers_Liang_HIP
FIGNL1	DownWithAlzheimers_Liang_HIP
FKBP1A	DownWithAlzheimers_Liang_HIP
FKBP2	DownWithAlzheimers_Liang_HIP
FKRP	DownWithAlzheimers_Liang_HIP
FMR1	DownWithAlzheimers_Liang_HIP
FN3KRP	DownWithAlzheimers_Liang_HIP
FNBP4	DownWithAlzheimers_Liang_HIP
FNTA	DownWithAlzheimers_Liang_HIP
FOSL2	DownWithAlzheimers_Liang_HIP
FOXJ3	DownWithAlzheimers_Liang_HIP
FRMD4A	DownWithAlzheimers_Liang_HIP
FSD1	DownWithAlzheimers_Liang_HIP
FTH1	DownWithAlzheimers_Liang_HIP
FUCA1	DownWithAlzheimers_Liang_HIP
FUNDC2	DownWithAlzheimers_Liang_HIP
FUS	DownWithAlzheimers_Liang_HIP
FUT8	DownWithAlzheimers_Liang_HIP
FXR1	DownWithAlzheimers_Liang_HIP
FXR1	DownWithAlzheimers_Liang_HIP
FYTTD1	DownWithAlzheimers_Liang_HIP
GABARAP	DownWithAlzheimers_Liang_HIP
GABARAPL1	DownWithAlzheimers_Liang_HIP
GABARAPL2	DownWithAlzheimers_Liang_HIP
GABBR1	DownWithAlzheimers_Liang_HIP
GABRA5	DownWithAlzheimers_Liang_HIP
GABRB3	DownWithAlzheimers_Liang_HIP
GABRG2	DownWithAlzheimers_Liang_HIP
GAK	DownWithAlzheimers_Liang_HIP
GALC	DownWithAlzheimers_Liang_HIP
GAPDH	DownWithAlzheimers_Liang_HIP
GAPDH	DownWithAlzheimers_Liang_HIP
GAPDH	DownWithAlzheimers_Liang_HIP
GAPDH	DownWithAlzheimers_Liang_HIP
GAPDH	DownWithAlzheimers_Liang_HIP
GAPDH	DownWithAlzheimers_Liang_HIP
GARS	DownWithAlzheimers_Liang_HIP
GATM	DownWithAlzheimers_Liang_HIP
GATS	DownWithAlzheimers_Liang_HIP
GBAS	DownWithAlzheimers_Liang_HIP
GCAT	DownWithAlzheimers_Liang_HIP
GCLC	DownWithAlzheimers_Liang_HIP
GDAP1	DownWithAlzheimers_Liang_HIP
GDI2	DownWithAlzheimers_Liang_HIP
GFM2	DownWithAlzheimers_Liang_HIP
GGCX	DownWithAlzheimers_Liang_HIP
GHITM	DownWithAlzheimers_Liang_HIP
GHITM	DownWithAlzheimers_Liang_HIP
GHITM	DownWithAlzheimers_Liang_HIP
GLCE	DownWithAlzheimers_Liang_HIP
GLO1	DownWithAlzheimers_Liang_HIP
GLRB	DownWithAlzheimers_Liang_HIP
GLRX	DownWithAlzheimers_Liang_HIP
GLRX	DownWithAlzheimers_Liang_HIP
GLS	DownWithAlzheimers_Liang_HIP
GLS	DownWithAlzheimers_Liang_HIP
GLS2	DownWithAlzheimers_Liang_HIP
GLT8D1	DownWithAlzheimers_Liang_HIP
GLUD1	DownWithAlzheimers_Liang_HIP
GMFB	DownWithAlzheimers_Liang_HIP
GMPR2	DownWithAlzheimers_Liang_HIP
GNAS	DownWithAlzheimers_Liang_HIP
GNAS	DownWithAlzheimers_Liang_HIP
GNAS	DownWithAlzheimers_Liang_HIP
GNAS	DownWithAlzheimers_Liang_HIP
GNAS	DownWithAlzheimers_Liang_HIP
GNB2	DownWithAlzheimers_Liang_HIP
GNB2L1	DownWithAlzheimers_Liang_HIP
GNG3	DownWithAlzheimers_Liang_HIP
GNL3	DownWithAlzheimers_Liang_HIP
GNPDA1	DownWithAlzheimers_Liang_HIP
GNPDA2	DownWithAlzheimers_Liang_HIP
GNPNAT1	DownWithAlzheimers_Liang_HIP
GOLGA3	DownWithAlzheimers_Liang_HIP
GOLGA5	DownWithAlzheimers_Liang_HIP
GOLGA7	DownWithAlzheimers_Liang_HIP
GOLGA8B	DownWithAlzheimers_Liang_HIP
GOLGB1	DownWithAlzheimers_Liang_HIP
GOPC	DownWithAlzheimers_Liang_HIP
GOT1	DownWithAlzheimers_Liang_HIP
GOT2	DownWithAlzheimers_Liang_HIP
GPBP1	DownWithAlzheimers_Liang_HIP
GPD2	DownWithAlzheimers_Liang_HIP
GPHN	DownWithAlzheimers_Liang_HIP
GPI	DownWithAlzheimers_Liang_HIP
GPM6A	DownWithAlzheimers_Liang_HIP
GPM6B	DownWithAlzheimers_Liang_HIP
GPM6B	DownWithAlzheimers_Liang_HIP
GPRASP1	DownWithAlzheimers_Liang_HIP
GPRASP2	DownWithAlzheimers_Liang_HIP
GPRC5B	DownWithAlzheimers_Liang_HIP
GPX4	DownWithAlzheimers_Liang_HIP
GRB10	DownWithAlzheimers_Liang_HIP
GRHPR	DownWithAlzheimers_Liang_HIP
GRHPR	DownWithAlzheimers_Liang_HIP
GRHPR	DownWithAlzheimers_Liang_HIP
GRIA1	DownWithAlzheimers_Liang_HIP
GRIPAP1	DownWithAlzheimers_Liang_HIP
GRSF1	DownWithAlzheimers_Liang_HIP
GSK3B	DownWithAlzheimers_Liang_HIP
GSK3B	DownWithAlzheimers_Liang_HIP
GSS	DownWithAlzheimers_Liang_HIP
GSTA4	DownWithAlzheimers_Liang_HIP
GSTO1	DownWithAlzheimers_Liang_HIP
GSTO1	DownWithAlzheimers_Liang_HIP
GTDC1	DownWithAlzheimers_Liang_HIP
GTF2A1	DownWithAlzheimers_Liang_HIP
GTF2B	DownWithAlzheimers_Liang_HIP
GTF2E2	DownWithAlzheimers_Liang_HIP
GTF2F1	DownWithAlzheimers_Liang_HIP
GTF3A	DownWithAlzheimers_Liang_HIP
GTF3A	DownWithAlzheimers_Liang_HIP
GTF3C1	DownWithAlzheimers_Liang_HIP
GTF3C4	DownWithAlzheimers_Liang_HIP
GUCY1B3	DownWithAlzheimers_Liang_HIP
H2AFV	DownWithAlzheimers_Liang_HIP
H2AFY	DownWithAlzheimers_Liang_HIP
H2AFZ	DownWithAlzheimers_Liang_HIP
H3F3B	DownWithAlzheimers_Liang_HIP
H3F3B	DownWithAlzheimers_Liang_HIP
HABP4	DownWithAlzheimers_Liang_HIP
HABP4	DownWithAlzheimers_Liang_HIP
HADHA	DownWithAlzheimers_Liang_HIP
HADHB	DownWithAlzheimers_Liang_HIP
HAGH	DownWithAlzheimers_Liang_HIP
HARS	DownWithAlzheimers_Liang_HIP
HARS2	DownWithAlzheimers_Liang_HIP
HAX1	DownWithAlzheimers_Liang_HIP
HBS1L	DownWithAlzheimers_Liang_HIP
HCCS	DownWithAlzheimers_Liang_HIP
HDDC2	DownWithAlzheimers_Liang_HIP
HDHD2	DownWithAlzheimers_Liang_HIP
HDLBP	DownWithAlzheimers_Liang_HIP
HEBP2	DownWithAlzheimers_Liang_HIP
HECTD1	DownWithAlzheimers_Liang_HIP
HEXB	DownWithAlzheimers_Liang_HIP
HIATL1	DownWithAlzheimers_Liang_HIP
HIGD1A	DownWithAlzheimers_Liang_HIP
HINT1	DownWithAlzheimers_Liang_HIP
HINT1	DownWithAlzheimers_Liang_HIP
HINT1	DownWithAlzheimers_Liang_HIP
HIST2H2BE	DownWithAlzheimers_Liang_HIP
HIVEP2	DownWithAlzheimers_Liang_HIP
HK1	DownWithAlzheimers_Liang_HIP
HLF	DownWithAlzheimers_Liang_HIP
HMG20A	DownWithAlzheimers_Liang_HIP
HMGB1	DownWithAlzheimers_Liang_HIP
HMGB3	DownWithAlzheimers_Liang_HIP
HMGCLL1	DownWithAlzheimers_Liang_HIP
HMGCR	DownWithAlzheimers_Liang_HIP
HMGCS1	DownWithAlzheimers_Liang_HIP
HMGN1	DownWithAlzheimers_Liang_HIP
HMGN2	DownWithAlzheimers_Liang_HIP
HMGN4	DownWithAlzheimers_Liang_HIP
HMGN4	DownWithAlzheimers_Liang_HIP
HMGN4	DownWithAlzheimers_Liang_HIP
HMP19	DownWithAlzheimers_Liang_HIP
HN1	DownWithAlzheimers_Liang_HIP
HN1	DownWithAlzheimers_Liang_HIP
HPCAL4	DownWithAlzheimers_Liang_HIP
HPRT1	DownWithAlzheimers_Liang_HIP
HPS4	DownWithAlzheimers_Liang_HIP
HRAS	DownWithAlzheimers_Liang_HIP
HRSP12	DownWithAlzheimers_Liang_HIP
HS6ST3	DownWithAlzheimers_Liang_HIP
HSBP1	DownWithAlzheimers_Liang_HIP
HSDL1	DownWithAlzheimers_Liang_HIP
HSF2	DownWithAlzheimers_Liang_HIP
HSPA12A	DownWithAlzheimers_Liang_HIP
HSPA8	DownWithAlzheimers_Liang_HIP
HSPA8	DownWithAlzheimers_Liang_HIP
HSPA8	DownWithAlzheimers_Liang_HIP
HSPD1	DownWithAlzheimers_Liang_HIP
HUNK	DownWithAlzheimers_Liang_HIP
HUWE1	DownWithAlzheimers_Liang_HIP
HUWE1	DownWithAlzheimers_Liang_HIP
HYOU1	DownWithAlzheimers_Liang_HIP
IARS	DownWithAlzheimers_Liang_HIP
IARS2	DownWithAlzheimers_Liang_HIP
ICMT	DownWithAlzheimers_Liang_HIP
ICT1	DownWithAlzheimers_Liang_HIP
IDH3A	DownWithAlzheimers_Liang_HIP
IDH3A	DownWithAlzheimers_Liang_HIP
IDH3B	DownWithAlzheimers_Liang_HIP
IDH3B	DownWithAlzheimers_Liang_HIP
IDH3B	DownWithAlzheimers_Liang_HIP
IDH3G	DownWithAlzheimers_Liang_HIP
IDI1	DownWithAlzheimers_Liang_HIP
IDI1	DownWithAlzheimers_Liang_HIP
IFNGR1	DownWithAlzheimers_Liang_HIP
IK	DownWithAlzheimers_Liang_HIP
IKBKAP	DownWithAlzheimers_Liang_HIP
IL6ST	DownWithAlzheimers_Liang_HIP
IL7	DownWithAlzheimers_Liang_HIP
ILF2	DownWithAlzheimers_Liang_HIP
ILKAP	DownWithAlzheimers_Liang_HIP
IMMT	DownWithAlzheimers_Liang_HIP
IMP3	DownWithAlzheimers_Liang_HIP
IMP4	DownWithAlzheimers_Liang_HIP
IMPAD1	DownWithAlzheimers_Liang_HIP
IMPDH2	DownWithAlzheimers_Liang_HIP
INA	DownWithAlzheimers_Liang_HIP
INPP1	DownWithAlzheimers_Liang_HIP
INPP4A	DownWithAlzheimers_Liang_HIP
INPP5F	DownWithAlzheimers_Liang_HIP
INSIG1	DownWithAlzheimers_Liang_HIP
INSIG2	DownWithAlzheimers_Liang_HIP
IPO11	DownWithAlzheimers_Liang_HIP
IPO8	DownWithAlzheimers_Liang_HIP
IQCE	DownWithAlzheimers_Liang_HIP
IQCG	DownWithAlzheimers_Liang_HIP
IQSEC1	DownWithAlzheimers_Liang_HIP
IQSEC1	DownWithAlzheimers_Liang_HIP
ITGB1BP1	DownWithAlzheimers_Liang_HIP
ITM2C	DownWithAlzheimers_Liang_HIP
ITPA	DownWithAlzheimers_Liang_HIP
JAGN1	DownWithAlzheimers_Liang_HIP
JAK1	DownWithAlzheimers_Liang_HIP
JMJD1C	DownWithAlzheimers_Liang_HIP
KARS	DownWithAlzheimers_Liang_HIP
KBTBD11	DownWithAlzheimers_Liang_HIP
KBTBD6	DownWithAlzheimers_Liang_HIP
KCTD1	DownWithAlzheimers_Liang_HIP
KCTD2	DownWithAlzheimers_Liang_HIP
KCTD7	DownWithAlzheimers_Liang_HIP
KDELR2	DownWithAlzheimers_Liang_HIP
KEAP1	DownWithAlzheimers_Liang_HIP
KIAA0100	DownWithAlzheimers_Liang_HIP
KIAA0196	DownWithAlzheimers_Liang_HIP
KIAA0232	DownWithAlzheimers_Liang_HIP
KIAA0368	DownWithAlzheimers_Liang_HIP
KIAA0513	DownWithAlzheimers_Liang_HIP
KIAA1045	DownWithAlzheimers_Liang_HIP
KIAA1279	DownWithAlzheimers_Liang_HIP
KIAA1324L	DownWithAlzheimers_Liang_HIP
KIAA1429	DownWithAlzheimers_Liang_HIP
KIAA1468	DownWithAlzheimers_Liang_HIP
KIAA1671	DownWithAlzheimers_Liang_HIP
KIAA1715	DownWithAlzheimers_Liang_HIP
KIAA2013	DownWithAlzheimers_Liang_HIP
KIF1B	DownWithAlzheimers_Liang_HIP
KIF21A	DownWithAlzheimers_Liang_HIP
KIF3B	DownWithAlzheimers_Liang_HIP
KIFAP3	DownWithAlzheimers_Liang_HIP
KLF12	DownWithAlzheimers_Liang_HIP
KLHDC2	DownWithAlzheimers_Liang_HIP
KLHDC3	DownWithAlzheimers_Liang_HIP
KLHDC3	DownWithAlzheimers_Liang_HIP
KLHL12	DownWithAlzheimers_Liang_HIP
KNDC1	DownWithAlzheimers_Liang_HIP
KPNA1	DownWithAlzheimers_Liang_HIP
KPNA1	DownWithAlzheimers_Liang_HIP
KPNA2	DownWithAlzheimers_Liang_HIP
KPNA3	DownWithAlzheimers_Liang_HIP
KPNB1	DownWithAlzheimers_Liang_HIP
LAMP1	DownWithAlzheimers_Liang_HIP
LANCL1	DownWithAlzheimers_Liang_HIP
LANCL1	DownWithAlzheimers_Liang_HIP
LAP3	DownWithAlzheimers_Liang_HIP
LAPTM4A	DownWithAlzheimers_Liang_HIP
LARGE	DownWithAlzheimers_Liang_HIP
LARP6	DownWithAlzheimers_Liang_HIP
LARS	DownWithAlzheimers_Liang_HIP
LCMT1	DownWithAlzheimers_Liang_HIP
LDHA	DownWithAlzheimers_Liang_HIP
LDHB	DownWithAlzheimers_Liang_HIP
LDHB	DownWithAlzheimers_Liang_HIP
LDLR	DownWithAlzheimers_Liang_HIP
LDOC1L	DownWithAlzheimers_Liang_HIP
LEO1	DownWithAlzheimers_Liang_HIP
LEPROTL1	DownWithAlzheimers_Liang_HIP
LETMD1	DownWithAlzheimers_Liang_HIP
LGALS8	DownWithAlzheimers_Liang_HIP
LGALS8	DownWithAlzheimers_Liang_HIP
LGALS8	DownWithAlzheimers_Liang_HIP
LGI1	DownWithAlzheimers_Liang_HIP
LIPA	DownWithAlzheimers_Liang_HIP
LMAN2	DownWithAlzheimers_Liang_HIP
LMBRD1	DownWithAlzheimers_Liang_HIP
LMO2	DownWithAlzheimers_Liang_HIP
LMO3	DownWithAlzheimers_Liang_HIP
LMO4	DownWithAlzheimers_Liang_HIP
LOC93622	DownWithAlzheimers_Liang_HIP
LPGAT1	DownWithAlzheimers_Liang_HIP
LPIN1	DownWithAlzheimers_Liang_HIP
LRBA	DownWithAlzheimers_Liang_HIP
LRCH2	DownWithAlzheimers_Liang_HIP
LRP12	DownWithAlzheimers_Liang_HIP
LRPPRC	DownWithAlzheimers_Liang_HIP
LRPPRC	DownWithAlzheimers_Liang_HIP
LRRC41	DownWithAlzheimers_Liang_HIP
LRRC47	DownWithAlzheimers_Liang_HIP
LRRC49	DownWithAlzheimers_Liang_HIP
LRRC8D	DownWithAlzheimers_Liang_HIP
LSM1	DownWithAlzheimers_Liang_HIP
LSM3	DownWithAlzheimers_Liang_HIP
LSM4	DownWithAlzheimers_Liang_HIP
LSM7	DownWithAlzheimers_Liang_HIP
LTA4H	DownWithAlzheimers_Liang_HIP
LUC7L	DownWithAlzheimers_Liang_HIP
LUC7L	DownWithAlzheimers_Liang_HIP
LUC7L2	DownWithAlzheimers_Liang_HIP
LUZP1	DownWithAlzheimers_Liang_HIP
LYSMD2	DownWithAlzheimers_Liang_HIP
LYST	DownWithAlzheimers_Liang_HIP
M6PR	DownWithAlzheimers_Liang_HIP
MACF1	DownWithAlzheimers_Liang_HIP
MACF1	DownWithAlzheimers_Liang_HIP
MAD2L1BP	DownWithAlzheimers_Liang_HIP
MADD	DownWithAlzheimers_Liang_HIP
MADD	DownWithAlzheimers_Liang_HIP
MAEA	DownWithAlzheimers_Liang_HIP
MAGED1	DownWithAlzheimers_Liang_HIP
MAGED2	DownWithAlzheimers_Liang_HIP
MAGED4	DownWithAlzheimers_Liang_HIP
MAGI3	DownWithAlzheimers_Liang_HIP
MAL2	DownWithAlzheimers_Liang_HIP
MANBAL	DownWithAlzheimers_Liang_HIP
MANEAL	DownWithAlzheimers_Liang_HIP
MAOB	DownWithAlzheimers_Liang_HIP
MAP1A	DownWithAlzheimers_Liang_HIP
MAP1LC3B	DownWithAlzheimers_Liang_HIP
MAP2K1	DownWithAlzheimers_Liang_HIP
MAP2K4	DownWithAlzheimers_Liang_HIP
MAP3K9	DownWithAlzheimers_Liang_HIP
MAP4	DownWithAlzheimers_Liang_HIP
MAP6	DownWithAlzheimers_Liang_HIP
MAPK1	DownWithAlzheimers_Liang_HIP
MAPK10	DownWithAlzheimers_Liang_HIP
MAPK14	DownWithAlzheimers_Liang_HIP
MAPK9	DownWithAlzheimers_Liang_HIP
MAPKAP1	DownWithAlzheimers_Liang_HIP
MAPRE2	DownWithAlzheimers_Liang_HIP
MAPT	DownWithAlzheimers_Liang_HIP
MARK3	DownWithAlzheimers_Liang_HIP
MARS	DownWithAlzheimers_Liang_HIP
MAST3	DownWithAlzheimers_Liang_HIP
MAT2B	DownWithAlzheimers_Liang_HIP
MATR3	DownWithAlzheimers_Liang_HIP
MBP	DownWithAlzheimers_Liang_HIP
MBTPS1	DownWithAlzheimers_Liang_HIP
MCF2	DownWithAlzheimers_Liang_HIP
MCM3AP	DownWithAlzheimers_Liang_HIP
MCTS1	DownWithAlzheimers_Liang_HIP
MDH1	DownWithAlzheimers_Liang_HIP
MDH2	DownWithAlzheimers_Liang_HIP
MDH2	DownWithAlzheimers_Liang_HIP
MDN1	DownWithAlzheimers_Liang_HIP
ME2	DownWithAlzheimers_Liang_HIP
ME3	DownWithAlzheimers_Liang_HIP
MEF2A	DownWithAlzheimers_Liang_HIP
MESDC2	DownWithAlzheimers_Liang_HIP
METAP1	DownWithAlzheimers_Liang_HIP
METTL3	DownWithAlzheimers_Liang_HIP
MGAT2	DownWithAlzheimers_Liang_HIP
MGAT3	DownWithAlzheimers_Liang_HIP
MGEA5	DownWithAlzheimers_Liang_HIP
MGST1	DownWithAlzheimers_Liang_HIP
MGST3	DownWithAlzheimers_Liang_HIP
MICAL2	DownWithAlzheimers_Liang_HIP
MIF	DownWithAlzheimers_Liang_HIP
MKKS	DownWithAlzheimers_Liang_HIP
MKKS	DownWithAlzheimers_Liang_HIP
MKLN1	DownWithAlzheimers_Liang_HIP
MKRN1	DownWithAlzheimers_Liang_HIP
MKRN2	DownWithAlzheimers_Liang_HIP
MLLT11	DownWithAlzheimers_Liang_HIP
MOAP1	DownWithAlzheimers_Liang_HIP
MOCS2	DownWithAlzheimers_Liang_HIP
MORF4L1	DownWithAlzheimers_Liang_HIP
MORF4L1	DownWithAlzheimers_Liang_HIP
MPP1	DownWithAlzheimers_Liang_HIP
MPPE1	DownWithAlzheimers_Liang_HIP
MPV17	DownWithAlzheimers_Liang_HIP
MRFAP1	DownWithAlzheimers_Liang_HIP
MRFAP1L1	DownWithAlzheimers_Liang_HIP
MRPL14	DownWithAlzheimers_Liang_HIP
MRPL15	DownWithAlzheimers_Liang_HIP
MRPL16	DownWithAlzheimers_Liang_HIP
MRPL17	DownWithAlzheimers_Liang_HIP
MRPL18	DownWithAlzheimers_Liang_HIP
MRPL20	DownWithAlzheimers_Liang_HIP
MRPL23	DownWithAlzheimers_Liang_HIP
MRPL24	DownWithAlzheimers_Liang_HIP
MRPL27	DownWithAlzheimers_Liang_HIP
MRPL28	DownWithAlzheimers_Liang_HIP
MRPL3	DownWithAlzheimers_Liang_HIP
MRPL32	DownWithAlzheimers_Liang_HIP
MRPL34	DownWithAlzheimers_Liang_HIP
MRPL35	DownWithAlzheimers_Liang_HIP
MRPL35	DownWithAlzheimers_Liang_HIP
MRPL36	DownWithAlzheimers_Liang_HIP
MRPL40	DownWithAlzheimers_Liang_HIP
MRPL46	DownWithAlzheimers_Liang_HIP
MRPL47	DownWithAlzheimers_Liang_HIP
MRPL53	DownWithAlzheimers_Liang_HIP
MRPL55	DownWithAlzheimers_Liang_HIP
MRPL9	DownWithAlzheimers_Liang_HIP
MRPL9	DownWithAlzheimers_Liang_HIP
MRPS10	DownWithAlzheimers_Liang_HIP
MRPS14	DownWithAlzheimers_Liang_HIP
MRPS15	DownWithAlzheimers_Liang_HIP
MRPS17	DownWithAlzheimers_Liang_HIP
MRPS21	DownWithAlzheimers_Liang_HIP
MRPS22	DownWithAlzheimers_Liang_HIP
MRPS22	DownWithAlzheimers_Liang_HIP
MRPS23	DownWithAlzheimers_Liang_HIP
MRPS25	DownWithAlzheimers_Liang_HIP
MRPS25	DownWithAlzheimers_Liang_HIP
MRPS27	DownWithAlzheimers_Liang_HIP
MRPS28	DownWithAlzheimers_Liang_HIP
MRPS35	DownWithAlzheimers_Liang_HIP
MRPS7	DownWithAlzheimers_Liang_HIP
MRPS9	DownWithAlzheimers_Liang_HIP
MSRA	DownWithAlzheimers_Liang_HIP
MSRB2	DownWithAlzheimers_Liang_HIP
MT3	DownWithAlzheimers_Liang_HIP
MTCH2	DownWithAlzheimers_Liang_HIP
MTCH2	DownWithAlzheimers_Liang_HIP
MTHFD1	DownWithAlzheimers_Liang_HIP
MTMR4	DownWithAlzheimers_Liang_HIP
MTPN	DownWithAlzheimers_Liang_HIP
MTX2	DownWithAlzheimers_Liang_HIP
MTX3	DownWithAlzheimers_Liang_HIP
MUM1L1	DownWithAlzheimers_Liang_HIP
MXRA7	DownWithAlzheimers_Liang_HIP
[truncated: 19,242 more rows]
