# Supplementary material for: Neuropathological and transcriptomic characteristics of the aged brain
Source: eLife. 2017 Nov 9;6:e31126. doi: 10.7554/eLife.31126 (PMC5679757; doi:10.7554/eLife.31126)
Supplement: Figure 6—source data 6. — SVA P-values (Bonferroni corrected) are shown. Only metrics with at least one significant association in any region in either the un-normalized or RIN-normalized data are included in the table. [file elife-31126-fig6-data6.xlsx]

## Sheet: SourceData6
Principal component	RIN (un-normalized)				RIN (RIN-normalized)				Batch (un-normalized)				Batch (RIN-normalized)				sex (un-normalized)				sex (RIN-normalized)				act_demented (un-normalized)				act_demented (RIN-normalized)				dsm_iv_clinical_diagnosis (un-normalized)				dsm_iv_clinical_diagnosis (RIN-normalized)				braak (un-normalized)				braak (RIN-normalized)				ihc_at8 (un-normalized)
	HIP	TCx	PCx	FWM	HIP	TCx	PCx	FWM	HIP	TCx	PCx	FWM	HIP	TCx	PCx	FWM	HIP	TCx	PCx	FWM	HIP	TCx	PCx	FWM	HIP	TCx	PCx	FWM	HIP	TCx	PCx	FWM	HIP	TCx	PCx	FWM	HIP	TCx	PCx	FWM	HIP	TCx	PCx	FWM	HIP	TCx	PCx	FWM	HIP
PC1	<1E-16	<1E-16	<1E-16	1	1	1	1	1	1	1	1	1	0.00921297	0.000430636	0.260306	1	1	1	1	1	1	1	1	1	0.0253303	0.00563157	0.00176278	0.418321	0.689322	0.0618335	1	1	1	0.07851	0.0849329	1	0.270332	0.00930986	1	1	0.447823	1	1	1	0.333633	1	1	1	0.442979
PC2	1	1	1	<1E-16	1	0.194072	1	1	4.77393e-05	5.78485e-07	1	1	0.538315	0.0284824	0.000769079	1	1	1	1	1	1	1	1	0.00541382	1	1	1	0.00170555	1	1	1	1	0.612704	0.162232	1	0.045278	1	1	0.279496	1	1	1	1	0.451958	1	1	1	1	1
PC3	1	1	1	1	1	1	1	1	0.0716012	1	7.25204e-05	1	0.0286243	1	1	1.28345e-07	1	1	1	0.198391	0.262304	1	0.804772	1	1	1	1	1	1	1	0.289634	1	1	1	0.485731	1	1	1	0.64131	0.217335	1	1	1	1	0.478516	1	1	1	1
PC4	1	1	1	1	1	1	1	0.0104468	1	1	1	1.97936e-07	0.507856	0.684935	1	1	0.0105529	1	0.0118765	1	0.0151863	1	7.86608e-05	1	1	1	1	1	1	1	1	0.760011	1	1	1	1	1	1	1	1	1	1	1	1	1	1	1	0.192254	0.293789
PC5	1	1	1	1	1	1	1	0.54691	1	1	1	1	1	1	1	1	0.0168914	9.74359e-11	0.198999	1	0.29767	0	2.80906e-09	1	1	1	1	1	1	1	1	1	1	1	1	1	1	1	1	1	1	0.377198	1	1	1	1	0.533185	1	1
PC6	1	1	1	1	1	1	1	0.287969	1	1	1	1	1	1	1	1	0.0754714	8.27211e-05	9.03999e-11	2.09115e-05	1	0.0572038	1	0.00429798	1	1	1	1	1	1	1	1	1	1	1	1	1	1	1	1	0.0295469	1	0.357342	1	0.534125	1	1	0.712366	0.488717
PC7	1	1	1	1	1	1.29693e-05	0.00198167	0.0111023	1	1	1	1	0.135371	0.654022	0.411788	0.578329	2.7009e-06	0.00623195	0.306644	8.48998e-06	6.59434e-10	1	0.902237	9.06932e-07	1	1	1	1	1	1	1	1	1	1	1	1	1	1	1	1	1	1	1	1	1	1	1	1	1
PC8	1	1	1	1	1	1	1	1	0.584181	1	1	1	1	1	1	1	0.415498	0.0568595	1	1	0.000677474	1	1	1	1	0.945906	1	1	1	0.232785	1	1	1	0.680468	1	1	1	1	1	1	1	1	1	0.798966	1	1	1	1	1
PC9	1	1	1	1	1	1	1	0.0312267	1	0.0610603	0.0543226	1	1	1	1	1	1	1	0.000673464	2.53902e-06	0.948205	0.349465	0.00163745	4.71639e-06	1	1	1	1	1	1	1	1	1	1	1	1	1	1	1	1	0.510602	1	1	1	0.396644	1	1	1	1
PC10	1	1	1	1	1	0.915481	0.0264421	4.80785e-06	1	1	1	1	1	1	1	1	2.06412e-05	0.194914	0.792147	1	1	0.696425	0.811569	1	1	1	1	1	1	1	1	1	1	1	1	1	1	1	1	1	1	1	1	1	1	1	1	1	1
PC11	1	1	1	1	1	1	1	1	1	1	1	0.202317	1	1	1	1	1	1	1	1	1	1	1	1	1	1	1	1	1	1	1	1	1	1	1	1	1	1	1	1	1	1	1	1	1	1	1	1	1
PC12	1	1	1	1	0.144687	1	0.0701529	1	1	1	1	0.373906	1	1	1	0.0492225	1	1	1	1	1	1	1	1	1	1	1	1	1	1	1	1	1	1	1	1	1	1	1	1	1	1	1	1	1	1	1	1	1
PC13	1	1	1	1	1	1	1	1	1	0.0337313	1	1	1	1	0.367743	1	1	1	1	1	1	1	1	1	1	1	1	0.478845	1	1	1	1	1	1	1	1	1	1	1	1	1	1	1	1	1	1	1	1	1
PC14	1	1	1	1	1	1	0.0165681	1	0.000189443	0.550707	1	1	0.000804415	0.00637684	1	1	1	1	1	1	1	1	1	1	1	1	1	1	1	1	1	1	1	1	1	1	1	1	1	1	1	1	1	1	1	1	1	1	1
PC15	1	1	1	1	1	1	1	1	1	1	1	1	1	1	1	1	1	1	1	0.685668	1	1	1	0.834702	1	1	1	1	1	1	1	1	1	1	0.793815	1	1	1	1	1	1	1	1	1	1	1	1	1	1
PC16	1	1	1	1	1	1	1	1	1	1	1	1	1	1	1	1	1	1	1	1	1	1	1	1	1	1	1	1	0.3427	1	1	1	1	1	1	1	0.12999	1	1	1	1	0.0323531	1	1	1	0.0686334	1	1	1
PC17	1	1	1	1	1	0.0571713	1	1	1	1	1	1	1	1	1	1	1	1	1	1	1	1	1	1	1	1	1	1	0.405377	0.781192	1	1	1	1	1	1	1	0.984942	1	1	1	1	0.964566	1	1	1	0.510298	1	0.0166509
PC18	1	1	1	1	1	1	1	0.533442	1	1	1	0.997439	1	1	1	0.427855	1	1	1	1	1	1	1	1	0.354282	1	1	1	1	1	1	1	0.540859	1	1	1	1	1	1	1	0.601349	1	1	1	1	1	1	1	1
PC19	1	1	1	1	1	0.660545	1	1	1	1	1	1	1	1	1	1	1	1	1	1	1	1	1	1	1	1	1	1	1	1	1	1	1	1	1	1	1	1	1	1	1	1	1	1	0.887114	1	1	1	1
PC20	1	1	1	1	0.987863	1	1	1	1	1	1	1	1	1	1	1	1	1	1	1	1	1	1	1	1	1	1	1	1	1	1	1	1	1	1	1	1	1	1	1	1	1	1	1	1	1	1	1	0.589132
PC21	1	1	1	1	1	1	1	1	1	1	1	1	1	1	1	1	1	1	1	1	1	1	1	1	1	1	1	0.0596638	1	1	1	1	1	1	1	0.0279629	1	1	1	1	1	1	1	1	1	1	1	1	1
PC22	1	1	1	1	0.188755	0.558486	0.349785	1	1	1	1	1	1	1	0.55962	1	1	1	1	1	1	1	1	1	1	1	1	1	1	1	0.762978	0.0962242	1	1	1	1	1	1	1	0.143574	1	1	1	1	1	1	0.348742	1	1
PC23	1	1	1	1	9.21994e-09	1	1	1	1	1	1	1	1	1	1	1	1	1	1	1	1	1	1	1	1	1	1	1	1	1	1	1	1	1	1	1	1	1	1	1	1	1	1	1	1	1	1	1	1
PC24	1	1	1	1	1	1	1	1	1	1	1	1	1	1	1	1	1	1	1	1	1	1	1	1	1	1	1	1	1	1	1	1	1	1	1	1	1	1	1	1	1	0.603792	1	1	1	1	1	1	1
PC25	1	1	1	1	1	1	1	1	1	1	1	1	1	1	1	1	1	1	1	1	1	1	1	1	1	1	1	1	1	1	1	1	1	1	1	1	1	1	1	1	1	1	1	1	1	0.280846	1	1	0.99266
[truncated: 87 more columns]
